# Supplementary material for: Integrated genomic analyses reveal frequent TERT aberrations in acral melanoma
Source: HighWire-hosted journal article supplement (doi:10.1101/gr.213348.116), 2017-04-01
Supplement: Supplemental_Tables.xlsx [file Supplemental_Tables.xlsx]

## Sheet: SuppTableS1A
Supplementary Table 1A
Summary patient characteristics
			N	%
	Stage at Presentation
		IB	1	0.0294118
		IIA	2	0.0588235
		IIB	1	0.0294118
		IIC	6	0.176471
		IIIA	3	0.0882353
		IIIB	10	0.294118
		IIIC	7	0.205882
		IV	1	0.0294118
		M1a	2	0.0588235
		M1c	1	0.0294118
	Primary Location
		Plantar foot	21	0.617647
		Subungual foot	9	0.264706
		Subungual hand	4	0.117647
	Primary Depth
		<1mm	3	0.0882353
		1.01-2.0mm	3	0.0882353
		2.01-4.0mm	12	0.352941
		>4.0mm	16	0.470588
	Primary Ulceration
		No	12	0.352941
		Yes	22	0.647059
	Primary Mitoses
		0	4	0.117647
		1	4	0.117647
		2-5	13	0.382353
		>5	12	0.352941
		Unknown	1	0.0294118
	In-transit disease
		No	20	0.588235
		Yes	14	0.411765
	Number of lymph nodes involved
		0	12	0.352941
		1	12	0.352941
		2-3	7	0.205882
		>4	2	0.0588235
		Unknown	1	0.0294118
	Race
		African-American	6	0.176471
		Caucasian	28	0.823529
	Disease Status
				Duration from dx (range)
		NED	8	18-125 mos
		AWD	8	23-134 mos
		DOD	16	14-107 mos
	Immunotherapy
		Anti-CTLA4	22	0.647059
		Anti-PD1	10	0.294118

## Sheet: SuppTableS1B
Supplementary Table 1B
Clinical features of patients
n/a=data not available
PATIENT	OS_MONTHS	OS_STATUS	DFS_MONTHS	DFS_STATUS	STAGE_PRESENTATION	PRIMARY_LOCATION	METASTASIZED	OR_DATE	SITE	SUBSITE	PRIMARY_DEPTH	PRIMARY_ULCERATION	PRIMARY_MITOSES	NUMBER_LYMPH_noDES	DOB	GENDER	RACE	DATE_DX	OR_DATE (sample collection)	Age_DX	DATE_RECURRENCE	SITE_FIRST_RECURRENCE	DATE_FUP	TREATMENT	IN_TRANSIT	ADJUVANT_RX	ANTI_PD1_RX	DATE_START_ANTI_PD1	DATE_ANTI_PD1_PROGRESSION	BEST_RESPONSE_ANTI_PD1	IPI_RX	DATE_START_IPI	DATE_IPI_PROGRESSION	BEST_RESPONSE_IPI	TARGETED_RX	DATE_START_TARGETED	DATE_TARGETED_PROGRESSION	BEST_RESPONSE_TARGETED	OTHER_RX	OTHER_RX_RESPONSES
1	28.03	DOD	21	no	IIIB	Plantar foot	no	2013-01-25	met	Inguninal( LN Regional)	0.5	no	<1	0	1934-04-15	F	Caucasian	2011-04-27	2013-01-25	77	2013-01-25	Inguinal LN	2013-08-26	no	no	no	no	no	n/a	n/a	no	n/a	n/a	n/a	Trametinib	2013-07-26	2013-08-21	PD	no	n/a
2	60.33	AWD	29.1	no	IIIA	Plantar foot	yes	2010-08-20	primary	Foot	5.5	no	6	2	1943-02-23	F	Caucasian	2010-07-07	2010-08-20	67	2012-12-07	Inguinal LN	2015-07-15	no	no	no	no	no	n/a	n/a	yes	2014-10-01	N/A	PR	Vem/cobi	2013-10-17	2014-07-24	PR	no	n/a
3	41.02	DOD	13.3	no	IIIB	Plantar foot	yes	2013-01-08	met	Leg( In-transit)	4	yes	4	1	1934-01-07	F	Caucasian	2011-09-08	2013-01-08	77	2012-10-16	Leg	2015-02-06	no	yes	no	Nivolumab	2013-01-28	2013-05-06	PD	yes	2014-01-17	2014-06-14	?SD/PD	no	n/a	n/a	n/a	no	n/a
4	34.05	AWD	5.5	no	M1c	Plantar foot	yes	2014-06-17	met	Mesentery (distant met)	1	no	2	9	1972-09-23	M	Caucasian	2012-09-21	2014-06-17	39	2013-03-06	Lung	2015-07-23	IL-2, ipi	no	no (radiation)	Pembrolizumab	2014-11-06	n/a	CR	yes	2013-10-30	2014-04-23	SD	no	n/a	n/a	n/a	IL-2	Brief SD
5	101.41	AWD	32.6	no	M1a	Subungual hand	yes	2013-12-03	met	Arm (in-transit)	5.5	yes	unknown	3	1959-06-10	M	Caucasian	2007-01-29	2013-12-03	47	2009-10-15	Arm in-transit	2015-07-09	Biochemo, limb infusion, ipi, IL-2, BCG, pembrolizumab, MEK/AKTi	yes	Biochemotherapy	Nivolumab	2013-04-29	2013-09-03	Brief SD	yes	2012-01-15	2012-05-18	PD	MEKi/AKTi	2013-11-19	2014-05-05	SD	IL-2, limb infusion, repeat nivolumab, TIL infusion, CVT	n/a
6	45.63	NED	10.7	yes	IIIC	Plantar foot	no	2012-11-21	met	Pelvic LN (deep regional)	2.6	no	1	2	1954-09-15	M	Caucasian	2011-09-12	2012-11-21	56	2012-08-03	Inguinal LN	2015-06-30	no	no	Ipilimumab	no	no	n/a	n/a	Adjuvant	n/a	n/a	n/a	no	n/a	n/a	n/a	no	n/a
7	85.89	DOD	51.2	no	IIIB	Subungual toe	yes	2013-11-11	met	Chest Wall (distant met)	5.5	yes	3	1	1960-04-26	M	Caucasian	2007-01-22	2013-11-11	46	2011-04-28	Lung	2014-03-17	IFN, Ipi, TM, carbo/taxol, IL-2, pembrolizumab	no	Interferon	Pembrolizumab	2013-03-27	2013-08-26	PD	yes	2011-05-20	2011-10-01	PD	MEKi/AKTi	2013-11-12	2014-01-07	PD	IL-2, carbo/taxol, TMZ	n/a
8	13.42	DOD	10.8	no	IIIB	Subungual thumb	yes	2012-03-28	primary	Thumb	6	yes	10	2	1952-07-06	F	Caucasian	2012-02-27	2012-03-28	59	2013-01-21	Brain	2013-04-10	no	no	Ipilimumab	no	no	n/a	n/a	Adjuvant	n/a	n/a	n/a	no	n/a	n/a	n/a	no	n/a
9	15.36	DOD	9.8	no	IIC	Subungual thumb	no	2013-08-16	primary	Thumb	8	yes	4	unknown	1926-11-15	F	Caucasian	2013-07-12	2013-08-16	86	2014-05-06	Axillary LN	2014-10-22	no	no	no	no	no	n/a	n/a	no	n/a	n/a	n/a	no	n/a	n/a	n/a	no	n/a
10	19.18	DOD	9.6	no	IIC	Plantar foot	yes	2011-10-05	primary	Heel	7	yes	13	0	1933-02-14	M	Caucasian	2011-08-12	2011-10-05	78	2012-05-29	Inguinal LN	2013-03-17	no	yes	no	MPDL3280A	2012-06-04	2012-08-29	PD	yes	2012-10-29	2013-01-22	PD	no	n/a	n/a	n/a	MLN8237	n/a
11	27.73	NED	27.3	yes	IIIC	Plantar toe	no	2013-04-24	met	Inguninal LN (Regional LN)	2.6	yes	4	5	1941-12-12	M	Caucasian	2013-03-15	2013-04-24	71	n/a	n/a	2015-07-06	no	no	Ipilimumab	no	no	n/a	n/a	no	n/a	n/a	n/a	no	n/a	n/a	n/a	no	n/a
12	17.99	DOD	13.6	no	IIIC	Plantar foot	yes	2011-05-20	primary	Foot	4	yes	15	1	1968-05-12	M	Caucasian	2011-03-30	2011-05-20	42	2012-05-17	Inguinal LN	2012-09-27	no	no	no	no	no	n/a	n/a	no	n/a	n/a	n/a	no	n/a	n/a	n/a	IL-2 (no response)	no response
13	18.36	NED	18.4	yes	IIIB	Subungual toe	no	2014-02-14	primary	Foot	8	yes	0	1	1954-07-23	M	Caucasian	2014-01-17	2014-02-14	59	n/a	n/a	2015-07-29	no	no	no	no	no	n/a	n/a	no	n/a	n/a	n/a	no	n/a	n/a	n/a	no	n/a
14	30.63	DOD	19.1	no	M1a	Subungual toe	yes	2013-02-22	met	Ankle (in-transit)	25	yes	6	3	1950-10-29	F	African American	2011-02-23	2013-02-22	60	2012-09-26	Leg in-transit	2013-09-11	no	yes	no	no	no	n/a	n/a	yes	2013-08-20	2013-09-15	PD	no	n/a	n/a	n/a	MLN8237	n/a
15	51.91	DOD	20	no	IIIc	Plantar foot	yes	2009-10-01	primary	Foot/Ankle	3	no	3	1	1959-09-09	M	Caucasian	2009-09-15	2009-10-01	50	2011-05-17	Leg in-transit	2014-01-10	no	yes	Interferon	no	no	n/a	n/a	yes	2013-12-02	2013-12-31	PD	Dab/Tram	2012-10-17	2013-07-23	PR	no	n/a
16	125.69	NED	16.6	yes	IIC	Plantar foot	no	2005-09-02	met	Obturator LN (Regional LN)	4.2	yes	5	0	1975-01-06	M	Caucasian	2004-04-14	2005-09-02	29	2005-09-02	Oburator LN	2014-09-30	GM-CSF vs. placebo	no	Interferon	no	no	n/a	n/a	no	n/a	n/a	n/a	no	n/a	n/a	n/a	no	n/a
17	162.57	AWD	120.3	no	IIA	Plantar foot	yes	2002-05-02	primary	foot	2.5	no	2	0	1948-12-26	F	African American	2002-04-15	2002-05-02	53	2012-04-19	in transit	2015-10-26	limb infusion, ipi, pd1, cvt	yes	no	Pembrolizumab	2013-08-28	2014-04-30	PR	yes	2012-05-31	2016-04-15	PR with ILI	no	n/a	n/a	n/a	CVT, surgery	prolonged SD, vitiligo)
18	101.71	NED	107.1	yes	IIB	Subungual	no	2002-10-10	primary	Greater Right Toe	2.1	yes	14	0	1965-02-16	M	Caucasian	2002-09-04	2002-10-10	37	n/a	n/a	2011-02-21	n/a	no	no	no	no	n/a	n/a	no	n/a	n/a	n/a	no	n/a	n/a	n/a	no	n/a
19	96.51	DOD	28.8	no	IIIB	foot	yes	2006-12-21	primary	Great Toe skin	4.3	yes	5	2	1958-12-22	M	African American	2006-12-21	2006-12-21	47	2009-05-15	in transit	2015-01-02	tem,ipi, carbo taxol, CVT	yes	no	Pembrolizumab	2014-08-07	2014-10-16	PD	yes	2012-07-06	2012-09-11	PD	trametinib + AKT/ProteinKinase B	2014-02-27	2014-03-27	PD	carvo/taxol, temodar, CVT, DTIC	PR
20	97.53	DOD	38.2	no	IIIB	Plantar foot	yes	2008-08-08	met	lymph node	3.2	yes	4	1	1951-02-03	F	African American	2005-02-14	2008-08-08	54	2008-04-21	in transit	2013-03-29	temodar, limb infusion	yes	vaccine	no	no	n/a	n/a	yes	2012-05-24	2012-11-15	PR	vem+ipi	2012-04-26	2012-11-15	PR with ipi	temodar	PD
21	23.95	DOD	7.6	no	IIIC	Plantar foot	yes	2009-12-15	primary	Left Toe tumor	12	no	3	1	1953-01-04	M	Caucasian	2009-11-30	2009-12-15	56	2010-07-20	in transit spine	2011-11-28	ipi, radiation	yes	oncovex	no	no	n/a	n/a	yes	2011-06-22	2011-11-28	PD	no	n/a	n/a	n/a	no	n/a
22	37.99	AWD	6.1	no	IIIA	Plantar foot	yes	2010-10-19	met	Inguinal	1.9	no	1	1	1955-06-17	M	Caucasian	2010-03-22	2010-10-19	54	2010-09-23	node	2013-05-20	ipi	no	no	no	no	n/a	n/a	yes	2013-09-15	2013-11-15	PR	no	n/a	n/a	n/a	no	n/a
23	13.72	DOD	2.3	no	IIIB	Plantar foot	yes	2011-04-22	primary	foot	4.2	yes	2	1	1956-08-01	M	Caucasian	2011-04-14	2011-04-22	54	2011-06-23	node	2012-06-04	IPI	no	no	no	no	n/a	n/a	yes	2011-10-21	2011-11-11	PD	no	n/a	n/a	n/a	no	n/a
24	106.94	DOD	85.7	no	IIA	Plantar foot	yes	2011-05-27	met	Upper Extremities	1.5	yes	6	0	1946-09-21	F	Caucasian	2004-04-08	2011-05-27	57	2011-05-27	soft tissue	2013-03-03	n/a	yes	no	no	no	n/a	n/a	no	n/a	n/a	n/a	no	n/a	n/a	n/a	no	n/a
25a	44.14	DOD	16.6	no	IIIB	Plantar foot	yes	2011-09-22	met	lymph node	0.9	no	0	0	1965-12-28	M	Caucasian	2010-03-22	2011-09-22	44	2011-08-09	node	2013-11-23	ipi, vem, RT, surgery	no	no	no	no	n/a	n/a	yes	2013-03-12	2013-06-10	PD	vem	2013-01-10	2016-03-04	PR	no	n/a
25b	44.14	DOD	16.6	no	IIIB	Plantar foot	yes	2012-05-10	met	lymph node	0.9	no	0	0	1965-12-28	M	Caucasian	2010-03-22	2012-05-10	44	2011-08-09	node	2013-11-23	n/a	n/a	no	no	no	n/a	n/a	no	n/a	n/a	n/a	no	n/a	n/a	n/a	no	n/a
26	21.18	NED	4.1	yes	IIC	Plantar foot	yes	2011-11-03	primary	Foot	5.5	yes	28	0	1932-11-18	M	Caucasian	2011-10-31	2011-11-03	78	2012-03-05	in transit	2013-08-05	limb infusion, ipi	yes	no	no	no	n/a	n/a	yes	2013-05-07	2013-07-09	CR	no	n/a	n/a	n/a	no	n/a
27	23.95	NED	24	yes	IB	Plantar foot	no	2012-09-11	primary	Foot	1.8	no	0	0	1952-06-19	M	Caucasian	2012-08-29	2012-09-11	60	n/a	n/a	2014-08-27	n/a	no	no	no	no	n/a	n/a	no	n/a	n/a	n/a	no	n/a	n/a	n/a	no	n/a
28	39.87	DOD	26.3	no	IIIB	Subungual toe	yes	2012-04-19	met	toe	4	yes	7	1	1947-10-24	M	Caucasian	2009-11-16	2012-04-19	62	2012-01-23	systemic (SB)	2013-03-12	carbo/taxol, limb infusion, DTIC, IPI+PD1	yes	no	ipi+pd1	2012-02-14	2016-04-19	PD +toxicity	yes	n/a	n/a	n/a	no	n/a	n/a	n/a	no	n/a
29a	38.82	NED	3.2	no	IIIC	Subungual toe	yes	2012-09-27	met	lymph node	3.5	no	1	1	1953-05-31	M	Caucasian	2012-09-27	2012-09-27	59	2013-01-03	node	2015-12-21	ipi, nivo	no	no	Nivo	2013-12-19	n/a	CR	yes	2013-06-06	2013-08-08	PR	no	n/a	n/a	n/a	no	n/a
29b	38.82	NED	3.2	no	IIIC	Subungual toe	yes	2012-09-27	primary	toe	3.5	no	1	1	1953-05-31	M	Caucasian	2012-09-27	2012-09-27	59	2013-01-03	node	2015-12-21	n/a	n/a	no	no	n/a	n/a	n/a	no	n/a	n/a	n/a	no	n/a	n/a	n/a	no	n/a
29c	38.82	NED	3.2	no	IIIC	Subungual toe	yes	2013-01-03	met	lymph node	3.5	no	1	1	1953-05-31	M	Caucasian	2012-09-27	2013-01-03	59	2013-01-03	node	2015-12-21	n/a	n/a	no	no	n/a	n/a	n/a	no	n/a	n/a	n/a	no	n/a	n/a	n/a	no	n/a
30	52.07	AWD	39.6	no	IIIa	Plantar foot	yes	2012-10-17	met	lower extremity	2.5	no	1	1	1955-05-07	F	Caucasian	2009-06-30	2012-10-17	54	2012-10-17	in transit	2013-10-30	n/a	yes	leukine	no	no	n/a	n/a	no	n/a	n/a	n/a	no	n/a	n/a	n/a	no	n/a
31	22.96	AWD	13.5	no	IIIC	toe	yes	2013-09-05	primary	toe	8	yes	8	2	1943-07-06	F	African American	2013-09-05	2013-09-05	70	2014-10-21	nodal	2015-08-04	ipi followed by pd1	no	no	Pembrolizumab	2015-08-04	n/a	PR	yes	2014-11-04	2013-08-01	PR	no	n/a	n/a	n/a	no	vitiligo
32	67.6	DOD	37.1	no	IIC	Subungual thumb	yes	2011-02-25	met	lung	4.5	yes	6	0	1953-08-10	M	Caucasian	2006-02-27	2011-02-25	52	2009-04-01	lung	2011-10-14	ipi, temodar	no	no	no	no	n/a	n/a	yes	2011-07-12	2016-09-13	2011-09-13	no	n/a	n/a	n/a	temodar, lung resection	PR
33	106.68	AWD	18.2	no	IV	Subungual toe	yes	2011-06-16	met	lymph node	15	yes	3	0	1934-05-20	F	White	2004-10-25	2011-06-16	70	2006-05-02	node	2013-09-11	n/a	no	no	no	n/a	n/a	n/a	no	n/a	n/a	n/a	no	n/a	n/a	n/a	no	n/a
34a	103.62	NED	93.9	yes	IIC	Plantar foot	yes	2015-03-19	met	leg	4	yes	7	0	1954-10-30	F	Caucasian	2007-05-24	2015-03-19	52	2015-03-19	in transit	2016-01-07	NY eso vaccine	yes	yes vaccine	no	no	n/a	n/a	no	n/a	n/a	n/a	no	n/a	n/a	n/a	Nyesovaccine	n/a
34b	103.62	NED	93.9	yes	IIC	Plantar foot	yes	2007-05-24	primary	foot	4	yes	7	0	1954-10-30	F	Caucasian	2007-05-24	2007-05-24	52	2015-03-19	in transit	n/a	n/a	yes	n/a	no	n/a	n/a	n/a	no	n/a	n/a	n/a	no	n/a	n/a	n/a	n/a	n/a

## Sheet: SuppTableS2
Supplementary Table 2
Assays performed and tumor cellularity estimates
		Exome		Long insert WG		RNA
Patient	%tumor cellularity	Constitutional	Tumor	Constitutional	Tumor	Tumor
1	98	x	x	x	x	x
2	27	x	x	x	x	x
3	16	x	x	x	x	x
4	80	x	x	x	x	x
5	91	x	x	x	x	x
6	15	x	x	x	x	x
7	67	x	x	x	x	x
8	45	x	x	x	x
9	90	x	x	x	x	x
10	70	x	x	x	x	x
11	25	x	x	x	x	x
12	84	x	x	x	x	x
13	44	x	x	x	x	x
14	77	x	x	x	x	x
15	37	x	x	x	x	x
16	24	x	x	x	x	x
17	26	x	x	x	x	x
18	28	x	x	x	x	x
19	53	x	x		x	x
20	68	x	x		x	x
21	67	x	x		x	x
22	24	x	x		x	x
23	41	x	x			x
24	71	x	x		x	x
25a	84	x	x	x	x	x
25b	29	x	x			x
26	57	x	x		x	x
27	29	x	x			x
28	57	x	x	x	x	x
29a	47	x	x		x	x
29b	23	x	x
29c	74	x	x		x	x
30	63	x	x		x	x
31	42	x	x		x	x
32	66	x	x	x	x	x
33	77		x		x	x
34a	22	x	x	x	x	x
34b	30	x	x			x

## Sheet: SuppTableS3
Supplementary Table 3
Sequencing metrics
Exomes (tumor/normal)	Total number of paired & mapped reads	16291118379
	Total number of mapped bases	1507698186726
	Mean mapped sequence coverage	164.2
	Median insert size (bp)	166
	Mean %alignment (pairs)	99.9
	Mean %target bases @ 20X	97
	Mean %target bases @ 30X	94.4
	Mean %target bases @ 40X	90.9
	Mean %target bases @ 50X	86.7
	Mean %target bases @ 100X	61.8
LIWG (tumor/normal)	Total number of paired & mapped reads	14270579152
	Total number of mapped bases	1303455245525
	Average sequence coverage	7.7973
	Average physical coverage	36.7
	Median insert size (bp)	916
	Mean %alignment (pairs)	99.7
	Mean DLRS	0.117
RNA (tumor only)	Total number of mapped reads	8852758992
	Total number of mapped bases	628389503549
	Median insert size (bp)	204
	Mean %alignment	100
	Mean %mRNA bases	89.9
	Mean %coding bases	56.4
	Mean %UTR bases	33.5
	Mean %intergenic bases	1.7
	Mean %intronic bases	4.5
	Mean %ribosomal bases	3.9

## Sheet: SuppTableS4
Supplementary Table 4
Somatic signature analysis
Sample signature ID (ALM)	Incidence across ALMs	Cosine similarity value to Alexandrov signature	Corresponding Alexandrov signature ID from Alexandrov et al. (2013)
S1	0.657895	0.980998	S7
S2	0.605263	0.345516	S8
S3	0.447368	0.362358	S21
S4	0.631579	0.845557	S1A
S5	0.578947	0.402586	S26/U1
S6	0.342105	0.538579	S27/U2
S7	0.605263	0.76072	S1B
S8	0.631579	0.60893	S27/U2
S9	0.552632	0.618575	S27/U2
S10	0.447368	0.710165	S1B

## Sheet: SuppTableS5
Supplementary Table 4
Selected somatic coding SNVs/indels
Patient	Gene (HGNC) (Aberration)	Chr location: base change	Quality	Tumor allele frequency
1	ABCA13 (L3513I)	chr7:48391933:C:A	53	0.233
1	AHNAK (I1103M)	chr11:62298580:G:C	46.6	0.481
1	APBB1 (G178R)	chr11:6432046:C:T	46.2	0.288
1	APCDD1L (R86C)	chr20:57042680:G:A	45.6	0.607
1	C14orf1 (T23M)	chr14:76123778:G:A	32.8	0.067
1	CACNA1E (R911Q)	chr1:181701954:G:A	49.5	0.28
1	CMYA5 (P3172S)	chr5:79034102:C:T	51	0.311
1	CNGA2 (H217N)	chrX:150911624:C:A	41.9	0.531
1	CUX2 (T381P)	chr12:111746120:A:C	49	0.964
1	CXXC5 (G256S)	chr5:139060874:G:A	47.7	0.481
1	CYP21A2 (P11S)	chr6:32006230:C:T	40.3	0.433
1	DGKB (W619C)	chr7:14384998:C:G	48.7	0.518
1	DOCK9 (L845F)	chr13:99535323:T:A	51.6	0.675
1	DPPA3 (R63Q)	chr12:7867884:G:A	48.6	0.447
1	FLCN (S432F)	chr17:17119699:G:A	46.4	0.422
1	FNDC1 (A1229V)	chr6:159655230:C:T	38.1	0.623
1	FOXJ3 (I108V)	chr1:42744066:T:C	50.1	0.515
1	GEN1 (H608Y)	chr2:17962301:C:T	50.3	0.306
1	GRB14 (P205S)	chr2:165381579:G:A	34.8	0.324
1	GRM1 (R628Q)	chr6:146720058:G:A	52	0.464
1	GSTA2 (A24T)	chr6:52622676:C:T	52.7	0.155
1	ITGB3 (A768V)	chr17:45387506:C:T	47.9	0.211
1	LGALS9C (V37I)	chr17:18387258:G:A	46.6	0.467
1	LIF (T167I)	chr22:30639749:G:A	54.2	0.237
1	MYO7A (R1604K)	chr11:76910822:G:A	48.1	0.091
1	MYO7A (D1613N)	chr11:76910848:G:A	37.1	0.08
1	NUMA1 (R1160Q)	chr11:71725070:C:T	49.2	0.136
1	NUP88 (K686N)	chr17:5290132:C:A	50.9	0.51
1	P4HA3 (K122N)	chr11:74013615:C:A	40.4	0.056
1	PLCB3 (R919W)	chr11:64032525:C:T	41.9	0.429
1	PLXNB3 (L337V)	chrX:153033222:C:G	46.1	0.591
1	PRKCG (C69Y)	chr19:54387418:G:A	48	0.354
1	RALGAPA2 (R1501P)	chr20:20493511:C:G	49	0.14
1	REM1 (R288C)	chr20:30072198:C:T	44.6	0.278
1	SF3B1 (P314S)	chr2:198273270:G:A	42.2	0.684
1	SLC26A7 (Q423H)	chr8:92365179:G:T	49.4	0.187
1	SLC7A13 (A245V)	chr8:87235284:G:A	53.5	0.237
1	SSC5D (R479Q)	chr19:56009295:G:A	48	0.231
1	SUPT20H (S383L)	chr13:37602288:G:A	47.7	0.253
1	TBCC (P169L)	chr6:42713306:G:A	38.3	0.209
1	TCEAL1 (R155C)	chrX:102885307:C:T	51.6	0.496
1	TCIRG1 (G405E)	chr11:67814948:G:A	45.1	0.287
1	THBS2 (R763C)	chr6:169628349:G:A	43.6	0.436
1	TMEM230 (W13C)	chr20:5093636:C:A	49.6	0.398
1	TMEM40 (R225H)	chr3:12777110:C:T	51.8	0.278
1	TNFSF10 (F163L)	chr3:172224639:G:T	55.4	0.341
1	TSLP (V141M)	chr5:110411713:G:A	54.3	0.333
1	XYLT1 (K558Q)	chr16:17232304:T:G	46.5	0.228
1	ZDHHC23 (R76C)	chr3:113672611:C:T	50.9	0.267
1	ZNF285 (R89L)	chr19:44892162:C:A	46.7	0.239
2	CACNA2D3 (S914R)	chr3:55038841:C:A	37.6	0.055
2	CCDC146 (K197Q)	chr7:76885731:A:C	53.6	0.313
2	CD6 (P652T)	chr11:60786737:C:A	53.4	0.184
2	CHST4 (R270C)	chr16:71571388:C:T	52.5	0.104
2	DENND4C (V1034L)	chr9:19342726:G:C	51.2	0.264
2	DNAH14 (Q1199E)	chr1:225284841:C:G	48.1	0.098
2	DNAH14 (L1221V)	chr1:225284907:C:G	45.9	0.096
2	EFTUD1 (H810Q)	chr15:82444365:G:T	50.8	0.127
2	EPHA6 (D204N)	chr3:96706333:G:A	52.8	0.188
2	FBLN1 (C617Y)	chr22:45958830:G:A	53.3	0.069
2	FRMD1 (G7E)	chr6:168479755:C:T	52.7	0.259
2	FUT10 (Y274F)	chr8:33246872:T:A	50	0.111
2	MGAM (L1146F)	chr7:141755481:G:T	39.1	0.091
2	MGAM (E1147K)	chr7:141755482:G:A	52	0.092
2	PCDHB7 (V228M)	chr5:140553098:G:A	53.4	0.058
2	PCDHGB4 (R410H)	chr5:140768680:G:A	54.1	0.165
2	PDZRN4 (E513K)	chr12:41961654:G:A	53.6	0.138
2	PKNOX1 (D389A)	chr21:44450066:A:C	50.1	0.094
2	PRPF39 (P79S)	chr14:45564677:C:T	53.6	0.083
2	TEX2 (V1032A)	chr17:62230371:A:G	50.4	0.3
2	TRMT1 (G377C)	chr19:13220630:C:A	51.4	0.077
2	ZFP1 (E321K)	chr16:75203969:G:A	28.8	0.06
3	DNAH9 (R3447C)	chr17:11778362:C:T	39.4	0.086
3	FCHSD2 (E167Q)	chr11:72700031:C:G	49.1	0.132
3	FCHSD2 (Q160H)	chr11:72700050:C:G	55.5	0.128
3	FCHSD2 (E140K)	chr11:72700112:C:T	43	0.113
3	HDAC9 (V863A)	chr7:18875524:T:C	49.7	0.151
3	IFT27 (V51L)	chr22:37163373:C:G	55	0.136
3	INSM2 (Y291*)	chr14:36004331:C:G	21.8	0.058
3	ITPR2 (D2603N)	chr12:26540417:C:T	51.3	0.1
3	KCNU1 (D991E)	chr8:36790479:T:A	34.8	0.199
3	KCNU1 (L992I)	chr8:36790480:C:A	44.3	0.2
3	NCAN (P647R)	chr19:19338369:C:G	28	0.055
3	PPP1R9A (E618K)	chr7:94827758:G:A	42.2	0.078
3	SMAD3 (A305S)	chr15:67477106:G:T	47	0.136
4	ABCA13 (D789A)	chr7:48311629:A:C	55.7	0.242
4	ABCA7 (L1252P)	chr19:1054597:T:C	45.1	0.206
4	ADAM23 (P780fs)	chr2:207460860:AC:A	52.2	0.102
4	ADCY8 (H101P)	chr8:132052278:T:G	44.5	0.096
4	ALG13 (F13C)	chrX:110924484:T:G	46.8	0.193
4	B3GNT4 (H80fs)	chr12:122691036:CA:C	53.8	0.119
4	C10orf12 (V247A)	chr10:98741887:T:C	53.5	0.099
4	CASKIN1 (G616fs)	chr16:2231521:GC:G	49.7	0.091
4	CCIN (G382R)	chr9:36170643:G:A	49.5	0.087
4	CLEC3B (R101H)	chr3:45077109:G:A	53.3	0.074
4	CLOCK (L123fs)	chr4:56336953:TA:T	43.1	0.147
4	COPB2 (S423fs)	chr3:139088325:A:AT	41.7	0.088
4	CRYGA (G159fs)	chr2:209025576:AC:A	43	0.146
4	DCAF17 (L219S)	chr2:172314509:T:C	54.1	0.169
4	DENND3 (S569P)	chr8:142176440:T:C	51.7	0.073
4	DENND4A (L1215fs)	chr15:65983285:AG:A	52.4	0.097
4	DLG5 (G994C)	chr10:79581262:C:A	50.4	0.343
4	DMAP1 (S331R)	chr1:44685490:A:C	49.2	0.818
4	DNAH1 (R4159fs)	chr3:52433592:AA:A	50.1	0.171
4	DYNC2H1 (S107F)	chr11:102984390:C:T	44.7	0.266
4	EDNRA (V398I)	chr4:148463678:G:A	47.6	0.071
4	EPB41L5 (A703V)	chr2:120925556:C:T	51.5	0.133
4	FAHD2B (P281fs)	chr2:97749724:TG:T	44.9	0.064
4	FCGBP (R54H)	chr19:40434108:C:T	53.5	0.141
4	GKN1 (I96V)	chr2:69206042:A:G	50.7	0.133
4	GPRIN1 (S484L)	chr5:176025385:G:A	48.5	0.222
4	ISLR2 (D73N)	chr15:74425312:G:A	50.7	0.125
4	ITIH3 (R570H)	chr3:52836822:G:A	41	0.163
4	KCNQ1 (A41V)	chr11:2466450:C:T	28.9	0.444
4	LCP2 (Q191fs)	chr5:169695438:TG:T	44.3	0.158
4	LRRC16B (R1036W)	chr14:24534192:C:T	43.1	0.061
4	MAGED2 (M27I)	chrX:54836190:G:A	53.8	0.134
4	MAP1A (A397V)	chr15:43814147:C:T	30.6	0.052
4	MAP1A (L2464M)	chr15:43820347:C:A	50.9	0.165
4	MAP3K1 (K1037R)	chr5:56178137:A:G	50.6	0.494
4	MAST4 (E1665fs)	chr5:66459986:AG:A	44.4	0.122
4	MBD3 (V101fs)	chr19:1584645:AC:A	51.4	0.143
4	MOCS2 (P22fs)	chr5:52402939:TG:T	51.9	0.118
4	MYO10 (A1945T)	chr5:16670685:C:T	50.1	0.072
4	NBEAL2 (P353fs)	chr3:47033985:GC:G	48.6	0.176
4	NBPF15 (D334N)	chr1:148589005:G:A	41.9	0.438
4	NOA1 (A582T)	chr4:57832806:C:T	51.8	0.092
4	NOL9 (S460fs)	chr1:6592679:CT:C	55.4	0.075
4	NUBPL (T188N)	chr14:32257035:C:A	50.6	0.806
4	NUP205 (P640fs)	chr7:135279378:TC:T	51.4	0.115
4	OTUD7A (G616fs)	chr15:31776451:GC:G	52.7	0.077
4	PCDH10 (R81H)	chr4:134071537:G:A	53.8	0.129
4	PRR12 (A743V)	chr19:50099820:C:T	48.3	0.12
4	PTPRT (P1094fs)	chr20:40739002:CG:C	51	0.162
4	PURB (Ter313Rext*?)	chr7:44924011:A:G	54.3	0.088
4	PXDNL (A857T)	chr8:52321615:C:T	52	0.142
4	RDH13 (P296fs)	chr19:55556550:CG:C	54.8	0.056
4	RGS22 (T812K)	chr8:101018264:G:T	54.3	0.086
4	RMND5A (L53V)	chr2:86968064:T:G	53	0.112
4	RPAP1 (Q271H)	chr15:41823351:T:G	52	0.232
4	SH2B3 (G451A)	chr12:111885575:G:C	22.4	0.082
4	SIT1 (A32T)	chr9:35650757:C:T	40.6	0.07
4	SMAP1 (A440V)	chr6:71569952:C:T	50.4	0.082
4	SNX17 (V430I)	chr2:27599376:G:A	46.9	0.089
4	SOWAHB (R727L)	chr4:77816823:C:A	53.2	0.062
4	SP2 (D370N)	chr17:46000376:G:A	51.1	0.153
4	SYNE1 (E3772D)	chr6:152673426:C:A	43.8	0.054
4	TBL3 (A778T)	chr16:2028591:G:A	53.2	0.418
4	TCEA3 (G90*)	chr1:23743854:C:A	50.6	0.292
4	TMA16 (E51fs)	chr4:164428215:CG:C	39	0.194
4	TOP3A (G469C)	chr17:18194218:C:A	51.4	0.109
4	TP53BP2 (P105S)	chr1:223998192:G:A	37.4	0.082
4	TRAPPC9 (P729S)	chr8:141297797:G:A	52.1	0.069
4	UNC79 (V102I)	chr14:93940595:G:A	55.4	0.056
4	ZDHHC18 (P177fs)	chr1:27175127:AC:A	55.2	0.052
4	ZNF79 (Y305H)	chr9:130206892:T:C	21.1	0.055
4	ZRANB2 (G140C)	chr1:71537899:C:A	51.7	0.107
5	MARC2 (R286S)	chr1:220953555:G:T	26.6	0.602
5	MARC2 (K287*)	chr1:220953556:A:T	39	0.603
5	ACTRT1 (W341*)	chrX:127185164:C:T	49.2	0.847
5	ADAMTS9 (P984S)	chr3:64601710:G:A	47.2	0.52
5	AEBP1 (K1104E)	chr7:44153693:A:G	50.1	0.291
5	AGAP3 (G558D)	chr7:150837072:G:A	45	0.2
5	AGBL1 (G836S)	chr15:87066129:G:A	51.3	0.419
5	ALB (S294T)	chr4:74279173:T:A	52.3	0.411
5	ALB (S294L)	chr4:74279174:C:T	52.4	0.41
5	AMACR (W264*)	chr5:33989555:C:T	52.3	0.07
5	APH1A (I127V)	chr1:150239858:T:C	51.7	0.29
5	ARHGAP9 (H724Y)	chr12:57867843:G:A	49.1	0.949
5	ARPP19 (P118L)	chr15:52844174:G:A	48.7	0.421
5	ARRDC3 (P391S)	chr5:90669518:G:A	47.3	0.459
5	ASPM (Y2136C)	chr1:197071974:T:C	51.9	0.357
5	BHLHE22 (D150N)	chr8:65493795:G:A	48.2	0.349
5	C1RL (G370C)	chr12:7249343:C:A	50.2	0.227
5	C2orf16 (T543I)	chr2:27801067:C:T	51.5	0.418
5	C7orf62 (H179Y)	chr7:88423722:G:A	47.1	0.245
5	CCDC102B (N101S)	chr18:66504302:A:G	36.3	0.23
5	CCDC88A (K1279N)	chr2:55543160:T:A	48.3	0.327
5	CD163 (C291W)	chr12:7649635:A:C	52.4	0.687
5	CD177 (S130F)	chr19:43859822:C:T	50.9	0.371
5	CD93 (N59H)	chr20:23066655:T:G	41.2	0.316
5	CDC16 (C72fs)	chr13:115004478:GT:G	46.6	0.477
5	CDC16 (R73G)	chr13:115004480:C:G	46.8	0.477
5	CDH18 (G375R)	chr5:19571818:C:G	43	0.084
5	CDHR4 (T361N)	chr3:49832483:G:T	53.7	0.309
5	CEL (H458Y)	chr9:135945924:C:T	52.4	0.404
5	CHM (G17S)	chrX:85302488:C:T	43.1	0.909
5	CHRM4 (R26C)	chr11:46408032:G:A	52	0.511
5	CLUL1 (C132W)	chr18:619346:C:G	51.6	0.607
5	CTAGE1 (E184K)	chr18:19997225:C:T	43.4	0.556
5	DCHS1 (N2598S)	chr11:6645114:T:C	51.6	0.504
5	DCST1 (R261C)	chr1:155014222:C:T	51.4	0.633
5	DDX11 (R256W)	chr12:31242059:C:T	42	0.904
5	DDX60L (D965N)	chr4:169336645:C:T	49.3	0.321
5	DHX15 (M291R)	chr4:24556556:A:C	52.3	0.311
5	DHX8 (A966P)	chr17:41597594:G:C	49.2	0.298
5	DIAPH3 (K871N)	chr13:60435665:C:G	51.4	0.765
5	DRAXIN (E265K)	chr1:11772432:G:A	52.6	0.45
5	DSTYK (Y271*)	chr1:205138802:A:C	52.3	0.341
5	EIF2S3L (S131F)	chr12:10658893:C:T	47.4	1
5	F2R (S375F)	chr5:76029174:C:T	50.6	0.417
5	FAM57B (A137V)	chr16:30037964:G:A	49.8	0.451
5	FANCI (Q74*)	chr15:89804006:C:T	52.2	0.456
5	FBXW10 (N495S)	chr17:18661782:A:G	47.3	0.433
5	FGD6 (P1001S)	chr12:95528596:G:A	45.3	0.882
5	FSHR (F165L)	chr2:49216145:G:T	38.9	0.404
5	GALNT4 (P519S)	chr12:89916772:G:A	49.3	0.424
5	GBP2 (L433I)	chr1:89578220:G:T	52.4	0.467
5	GIPC3 (A229fs)	chr19:3589526:T:TG	49.7	0.239
5	GRIA1 (R843H)	chr5:153182028:G:A	50.9	0.388
5	GSTA2 (S202N)	chr6:52615439:C:T	50.4	0.416
5	HERC1 (S1989F)	chr15:63981870:G:A	50.3	0.305
5	HMX2 (S130A)	chr10:124909205:T:G	46.3	0.295
5	HOXC11 (G249R)	chr12:54369023:G:A	44	0.828
5	HYDIN (S3083G)	chr16:70928353:T:C	49.4	0.081
5	IDO1 (P314L)	chr8:39785433:C:T	50.3	0.811
5	ITGB3 (G286R)	chr17:45364514:G:A	42.2	0.347
5	ITSN2 (G228R)	chr2:24531597:C:T	47.1	0.462
5	JAG2 (P1157S)	chr14:105609280:G:A	53.3	0.843
5	KCNK9 (Ter375Lext*?)	chr8:140630502:T:A	51.4	0.458
5	KDR (I126V)	chr4:55981561:T:C	51.1	0.283
5	KMT2C (P1928L)	chr7:151879162:G:A	53.7	0.158
5	KRAS (V14L)	chr12:25398279:C:A	24.4	0.948
5	KRT2 (R524K)	chr12:53039152:C:T	46.5	0.454
5	LAD1 (D36N)	chr1:201358406:C:T	46.4	0.682
5	LDHD (S42T)	chr16:75149507:A:T	49.1	0.508
5	LRRC8B (S223F)	chr1:90048877:C:T	50.9	0.393
5	LRRTM1 (M271I)	chr2:80530132:C:T	51.6	0.476
5	LTBP3 (P116L)	chr11:65321836:G:A	51.5	0.49
5	LYPD6B (K64E)	chr2:150061879:A:G	43.2	0.319
5	LYSMD2 (K121N)	chr15:52017229:C:A	51.5	0.314
5	MBD3L1 (P46L)	chr19:8953491:C:T	50.6	0.363
5	MDN1 (H5118Y)	chr6:90365621:G:A	51.5	0.839
5	MLLT6 (G27R)	chr17:36861964:G:C	49.1	0.412
5	MORN3 (K9E)	chr12:122107365:T:C	53.5	0.468
5	MYT1 (E805K)	chr20:62853336:G:A	46.1	0.429
5	NAPEPLD (P380L)	chr7:102760045:G:A	52	0.21
5	NEIL3 (R175G)	chr4:178257371:C:G	41.2	0.424
5	NOS2 (F1114L)	chr17:26085921:A:G	45.1	0.29
5	NRAP (G1325E)	chr10:115364645:C:T	52.5	0.35
5	NTRK1 (V282I)	chr1:156841541:G:A	50.2	0.097
5	NUCB2 (M130T)	chr11:17331128:T:C	51.5	0.451
5	OSBPL7 (N835D)	chr17:45885683:T:C	45.8	0.556
5	OSBPL7 (C674*)	chr17:45886703:G:T	49.7	0.438
5	PADI2 (R232Q)	chr1:17413155:C:T	51.8	0.448
5	PCDHGB6 (N359H)	chr5:140788844:A:C	54.4	0.467
5	PCLO (E4910K)	chr7:82451874:C:T	42	0.243
5	PCNXL2 (S1035*)	chr1:233314884:G:T	42.5	0.291
5	PDE7B (F117L)	chr6:136470255:T:C	52.5	0.78
5	PHF2 (L1096F)	chr9:96439953:C:T	51	0.426
5	PHLDB2 (R1080Q)	chr3:111686595:G:A	46.2	0.378
5	PHLDB2 (D1200N)	chr3:111692641:G:A	52	0.377
5	PIGN (V545A)	chr18:59774259:A:G	40.7	0.342
5	PITPNM3 (G45E)	chr17:6428768:C:T	48.8	0.343
5	PNPLA8 (N634S)	chr7:108119801:T:C	52.1	0.244
5	PPARD (P323R)	chr6:35392446:C:G	50.7	0.486
5	PRB3 (G190E)	chr12:11420614:C:T	45	0.447
5	PRKCE (F698L)	chr2:46411900:T:A	48.3	0.43
5	PSMB9 (W123*)	chr6:32825890:G:A	52.6	0.347
5	RELN (W3041*)	chr7:103137044:C:T	48	0.211
5	RFPL4AL1 (D101N)	chr19:56283982:G:A	51.8	0.439
5	RHO (E232G)	chr3:129251258:A:G	52	0.538
5	SCN3A (M1841I)	chr2:165947140:C:T	38.9	0.517
5	SCN7A (V1521L)	chr2:167262578:C:A	52.7	0.406
5	SFTPB (E70K)	chr2:85894825:C:T	50.8	0.437
5	SH2D4A (S430F)	chr8:19252077:C:T	45.3	0.705
5	SIRT7 (V103L)	chr17:79875520:C:G	43.8	0.431
5	SLC11A1 (L455F)	chr2:219258891:C:T	49.9	0.461
5	SLC12A1 (K645R)	chr15:48543959:A:G	49.3	0.387
5	SLC39A3 (S172R)	chr19:2733178:G:C	49	0.39
5	SLC8A1 (S823F)	chr2:40366618:G:A	52.3	0.351
5	SOWAHB (E371K)	chr4:77817892:C:T	36.7	0.452
5	SRF (P298L)	chr6:43143556:C:T	51.6	0.441
5	SYNC (A471T)	chr1:33149638:C:T	53.1	0.427
5	TCEB3CL2 (E368K)	chr18:44543270:C:T	39.3	0.078
5	TEX15 (S1176F)	chr8:30703007:G:A	50.7	0.885
5	THBS4 (P35S)	chr5:79335914:C:T	51.4	0.36
5	TMCO5A (K260M)	chr15:38243347:A:T	46.9	0.375
5	TMEM213 (H73Y)	chr7:138482913:C:T	49.5	0.48
5	TMEM60 (G59E)	chr7:77423515:C:T	55	0.196
5	TMPRSS4 (V240I)	chr11:117982590:G:A	53.9	0.432
5	TNXB (E2809K)	chr6:32023670:C:T	40.9	0.531
5	TOPAZ1 (M1263I)	chr3:44332370:G:A	50.8	0.458
5	TPMT (P139S)	chr6:18139900:G:A	47.1	0.368
5	TRIM55 (Y219H)	chr8:67061931:T:C	53.8	0.39
5	TRPM5 (E678Q)	chr11:2434428:C:G	43.7	0.471
5	VDR (G114R)	chr12:48258917:C:T	50.9	0.487
5	WDR72 (D73N)	chr15:54015042:C:T	53.2	0.41
5	YIPF7 (Q171*)	chr4:44626787:G:A	51.6	0.599
5	ZBTB21 (H816Y)	chr21:43411759:G:A	48.6	0.466
5	ZC3H4 (P997L)	chr19:47570535:G:A	51.6	0.463
5	ZCCHC16 (Q133*)	chrX:111698353:C:T	50.4	0.88
5	ZFC3H1 (P999L)	chr12:72026116:G:A	48.9	0.377
5	ZNF831 (P922S)	chr20:57768838:C:T	50.8	0.336
5	ZNF831 (P922L)	chr20:57768839:C:T	50.8	0.327
5	ZNF837 (R134C)	chr19:58880300:G:A	47.3	0.538
5	ZNF99 (S758C)	chr19:22940058:G:C	21.1	0.086
6	ASL (L154V)	chr7:65551585:C:G	45.4	0.135
6	ASL (P418S)	chr7:65557756:C:T	38.6	0.187
6	CASR (R233M)	chr3:121980580:G:T	23.4	0.062
6	CPM (S386R)	chr12:69250393:T:G	42.4	0.058
7	MARCH7 (G405R)	chr2:160605014:G:A	47.7	0.1
7	SEPT1 (H3Y)	chr16:30394119:G:A	52.3	0.058
7	AAK1 (P320S)	chr2:69754365:G:A	38.6	0.072
7	AAMDC (S33N)	chr11:77553640:G:A	49.4	0.14
7	ABCE1 (L580F)	chr4:146046239:C:T	44.1	0.127
7	ABHD6 (P313L)	chr3:58279416:C:T	41.7	0.084
7	ABL2 (P854L)	chr1:179077841:G:A	53.4	0.061
7	ABLIM1 (G46E)	chr10:116417823:C:T	48.1	0.119
7	ACIN1 (A234E)	chr14:23550017:G:T	52.3	0.168
7	ACSBG1 (G465S)	chr15:78471983:C:T	40.5	0.13
7	ACSS1 (R253K)	chr20:25004151:C:T	41	0.109
7	ADAM15 (G536E)	chr1:155030517:G:A	37.5	0.052
7	ADAMTS14 (S1223F)	chr10:72520596:C:T	30.7	0.081
7	ADAMTSL1 (T830I)	chr9:18775832:C:T	41.7	0.213
7	ADAMTSL4 (P248S)	chr1:150526209:C:T	35.9	0.066
7	ADAR (V25M)	chr1:154600402:C:T	46.7	0.156
7	ADCY2 (S655N)	chr5:7757569:G:A	51.9	0.809
7	ADNP (D839N)	chr20:49508736:C:T	50.1	0.099
7	ADORA1 (S135F)	chr1:203134451:C:T	53.8	0.058
7	AGFG1 (S146F)	chr2:228388538:C:T	52.5	0.101
7	AGPAT4 (G364S)	chr6:161557619:C:T	54.8	0.059
7	AHDC1 (G355E)	chr1:27877563:C:T	45.2	0.096
7	AHDC1 (S169F)	chr1:27878121:G:A	43.6	0.066
7	AHNAK2 (M921I)	chr14:105419025:C:T	50.6	0.376
7	AIFM3 (G201S)	chr22:21328904:G:A	20.5	0.073
7	AIM1L (E475K)	chr1:26662855:C:T	47.2	0.113
7	AKAP4 (A326T)	chrX:49958388:C:T	51.8	0.233
7	ALOXE3 (R345Q)	chr17:8017916:C:T	28.2	0.076
7	AMMECR1L (A82T)	chr2:128631565:C:T	16.1	0.064
7	AMPD2 (P106L)	chr1:110167988:C:T	52.1	0.147
7	ANGPT4 (E133K)	chr20:870924:C:T	49.2	0.105
7	ANKRD12 (E51K)	chr18:9195612:G:A	39.5	0.084
7	ANKRD17 (R1808G)	chr4:73957923:G:C	51.7	0.118
7	ANKRD30B (E523K)	chr18:14782610:G:A	51.1	0.102
7	APOL4 (T57I)	chr22:36591405:G:A	21.6	0.057
7	ARHGAP23 (R485C)	chr17:36623377:C:T	51.4	0.137
7	ARHGAP29 (T138I)	chr1:94674834:G:A	48.2	0.13
7	ARL13B (V19I)	chr3:93699322:G:A	50.3	0.244
7	ARNT2 (A707T)	chr15:80886004:G:A	51.9	0.109
7	ARRDC5 (P11L)	chr19:4902848:G:A	47.9	0.14
7	ASXL3 (R167K)	chr18:31250659:G:A	23.4	0.067
7	ATAD2 (P1065S)	chr8:124348631:G:A	54	0.102
7	ATP4A (L659F)	chr19:36046609:G:A	50.5	0.099
7	AVPR1A (A200T)	chr12:63544019:C:T	53.7	0.101
7	B3GALNT1 (E266Q)	chr3:160803747:C:G	52.9	0.257
7	B3GNT9 (T200I)	chr16:67183790:G:A	54.2	0.163
7	BARHL2 (A132V)	chr1:91182358:G:A	20	0.09
7	BCKDHA (E171K)	chr19:41919987:G:A	51.8	0.095
7	BCLAF1 (E618K)	chr6:136596670:C:T	47.6	0.125
7	BDP1 (G412E)	chr5:70785252:G:A	44.9	0.086
7	BEX2 (G8E)	chrX:102565354:C:T	21.7	0.2
7	BLACE (G113E)	chr7:155150537:C:T	50.5	0.063
7	BMP1 (E897G)	chr8:22067072:A:G	53.4	0.3
7	BPIFB4 (P395S)	chr20:31680303:C:T	45	0.118
7	BPTF (M1717I)	chr17:65908773:G:A	46.5	0.147
7	BRI3BP (W205*)	chr12:125509834:G:A	52.4	0.054
7	BTG1 (V111M)	chr12:92538041:C:T	49.5	0.194
7	BTN3A2 (P173S)	chr6:26370633:C:T	51.1	0.125
7	C10orf71 (P366L)	chr10:50531687:C:T	50.6	0.145
7	C11orf53 (G39E)	chr11:111154909:G:A	43.9	0.167
7	C12orf42 (S351C)	chr12:103695917:G:C	52	0.281
7	C12orf42 (S333*)	chr12:103695971:G:C	37.2	0.339
7	C15orf41 (R22K)	chr15:36872126:G:A	50.8	0.164
7	C16orf72 (S111N)	chr16:9196865:G:A	52.4	0.066
7	C1orf27 (D386N)	chr1:186375370:G:A	28	0.051
7	C1QTNF9B (D218N)	chr13:24465778:C:T	54	0.081
7	C1S (S39F)	chr12:7169889:C:T	49.3	0.28
7	C22orf46 (S4L)	chr22:42086642:C:T	53.3	0.135
7	C2CD3 (P1071L)	chr11:73804993:G:A	20.1	0.061
7	C2orf54 (G350S)	chr2:241827912:C:T	40.4	0.11
7	C2orf71 (S594F)	chr2:29295347:G:A	54.3	0.126
7	C2orf71 (S436F)	chr2:29295821:G:A	47.3	0.077
7	C3orf38 (R179K)	chr3:88205331:G:A	49.3	0.124
7	C4orf27 (S26N)	chr4:170674958:C:T	41.4	0.073
7	CA13 (E118K)	chr8:86171766:G:A	22.4	0.068
7	CACNA1D (P270L)	chr3:53699729:C:T	43.1	0.063
7	CACNA1E (P1503S)	chr1:181727906:C:T	53.6	0.079
7	CACNB3 (E427K)	chr12:49221506:G:A	47.6	0.062
7	CAMTA1 (P894S)	chr1:7730998:C:T	51.4	0.085
7	CASZ1 (E216K)	chr1:10720453:C:T	48.7	0.087
7	CCDC88A (E543K)	chr2:55563846:C:T	45.2	0.092
7	CCDC9 (E270K)	chr19:47769955:G:A	50	0.132
7	CCDC97 (E12K)	chr19:41816249:G:A	25.6	0.137
7	CCNB3 (M568L)	chrX:50052871:A:C	51.7	0.282
7	CCNE1 (P390L)	chr19:30314620:C:T	31.8	0.1
7	CD14 (P194S)	chr5:140011989:G:A	51.8	0.117
7	CD1E (A200T)	chr1:158325332:G:A	15.2	0.073
7	CD200 (G245E)	chr3:112066642:G:A	35.8	0.136
7	CD8A (G232E)	chr2:87016499:C:T	46.8	0.136
7	CDK12 (D668N)	chr17:37646880:G:A	41.7	0.098
7	CDK13 (G698R)	chr7:40039009:G:A	53.2	0.06
7	CDK5R2 (G215S)	chr2:219825185:G:A	50	0.122
7	CEP68 (T363I)	chr2:65299318:C:T	47.6	0.092
7	CEP97 (G442R)	chr3:101476774:G:A	52.2	0.125
7	CHAC2 (P103S)	chr2:54001414:C:T	52.8	0.116
7	CHD3 (G1842E)	chr17:7812101:G:A	52.3	0.107
7	CHRM1 (S126P)	chr11:62678197:A:G	52.4	0.153
7	CHST11 (P170Q)	chr12:105151031:C:A	54.4	0.053
7	CHSY3 (P761L)	chr5:129521117:C:T	53.8	0.102
7	CIZ1 (G693R)	chr9:130931934:C:T	51	0.148
7	CLEC4A (N221T)	chr12:8290831:A:C	53.1	0.11
7	CLSTN1 (V638I)	chr1:9795204:C:T	41.7	0.096
7	CLSTN2 (P954S)	chr3:140285087:C:T	31.3	0.154
7	CMPK1 (G228S)	chr1:47842412:G:A	54.2	0.086
7	CNIH2 (R35Q)	chr11:66049752:G:A	20.1	0.06
7	CNTN3 (G868S)	chr3:74334558:C:T	51.9	0.068
7	CNTN3 (S175F)	chr3:74420481:G:A	50.5	0.18
7	COL12A1 (G2984E)	chr6:75798881:C:T	38.4	0.105
7	COL5A2 (P728L)	chr2:189923201:G:A	47.3	0.145
7	COL6A1 (G143E)	chr21:47404383:G:A	53.4	0.073
7	COL7A1 (G1758R)	chr3:48616837:C:T	53.1	0.107
7	COL9A3 (P396L)	chr20:61461737:C:T	44.8	0.129
7	COMP (P155L)	chr19:18900033:G:A	45.4	0.078
7	CRB1 (G435E)	chr1:197390262:G:A	52	0.093
7	CREB3L2 (V424M)	chr7:137569741:C:T	52.3	0.071
7	CRELD1 (P34S)	chr3:9976222:C:T	45.3	0.102
7	CRY1 (G48S)	chr12:107486598:C:T	34.9	0.179
7	CS (E44K)	chr12:56679771:C:T	49	0.118
7	CSMD3 (E2506*)	chr8:113326691:C:A	53.3	0.121
7	CSMD3 (L1387F)	chr8:113569067:G:A	36.9	0.086
7	CSTF2T (P470L)	chr10:53457901:G:A	49	0.111
7	CUL9 (V72I)	chr6:43152262:G:A	52.3	0.135
7	CUL9 (D1287N)	chr6:43171164:G:A	32	0.064
7	CXXC1 (G529E)	chr18:47809885:C:T	50.6	0.083
7	CYP21A2 (P328S)	chr6:32008225:C:T	51.3	0.084
7	CYP46A1 (T114P)	chr14:100165860:A:C	43.5	0.121
7	DAAM1 (A347V)	chr14:59792432:C:T	25	0.098
7	DACT1 (G593E)	chr14:59113119:G:A	51.1	0.111
7	DALRD3 (G321D)	chr3:49054246:C:T	52.1	0.084
7	DBP (P218S)	chr19:49136811:G:A	34.2	0.109
7	DCAF8 (H697Y)	chr1:160188164:G:A	51.6	0.09
7	DCC (D1011N)	chr18:50936917:G:A	54	0.072
7	DCDC1 (T759I)	chr11:31099434:G:A	52.8	0.116
7	DCDC2B (E326K)	chr1:32681424:G:A	51.4	0.106
7	DCK (E143K)	chr4:71889301:G:A	51.9	0.093
7	DCTN1 (R41Q)	chr2:74605284:C:T	51.1	0.175
7	DDX39B (G117E)	chr6:31506913:C:T	53.2	0.075
7	DDX4 (D119N)	chr5:55063729:G:A	54.3	0.118
7	DDX59 (L185F)	chr1:200635316:G:A	49.6	0.051
7	DEF8 (E362K)	chr16:90028513:G:A	49.1	0.094
7	DHX29 (R1281K)	chr5:54557314:C:T	52.2	0.11
7	DHX34 (E177K)	chr19:47856816:G:A	51.2	0.127
7	DLEC1 (E1656K)	chr3:38163218:G:A	24.8	0.058
7	DLGAP4 (E681K)	chr20:35128021:G:A	51.1	0.136
7	DLL3 (G482S)	chr19:39998029:G:A	31.4	0.103
7	DMRT2 (E425D)	chr9:1056862:G:C	54.4	0.083
7	DNAH6 (E1561K)	chr2:84864361:G:A	38.3	0.108
7	DNAH6 (S2587F)	chr2:84926800:C:T	50.1	0.179
7	DNAH7 (R2284K)	chr2:196729528:C:T	54.9	0.096
7	DNAJB5 (G116R)	chr9:34993234:G:A	53.4	0.14
7	DNAJC1 (G515R)	chr10:22048152:C:T	51.1	0.112
7	DNAJC10 (I206S)	chr2:183593705:T:G	39.6	0.059
7	DNAJC10 (G210E)	chr2:183593717:G:A	43.7	0.068
7	DOCK2 (G235E)	chr5:169111297:G:A	53.1	0.113
7	DOCK8 (P105L)	chr9:286618:C:T	23.9	0.056
7	DOCK8 (S1697F)	chr9:439255:C:T	23	0.065
7	DST (S4940N)	chr6:56420367:C:T	41.2	0.051
7	DYM (G409S)	chr18:46798574:C:T	50.4	0.076
7	DYNC2H1 (P791L)	chr11:103006475:C:T	53.2	0.075
7	EGFR (V726M)	chr7:55241728:G:A	50.4	0.165
7	EML6 (P431L)	chr2:55077203:C:T	53.1	0.089
7	EPHA4 (V743M)	chr2:222301238:C:T	47.7	0.06
7	EPS8L1 (D438N)	chr19:55594843:G:A	32.3	0.074
7	EPS8L3 (M173I)	chr1:110301231:C:T	33.3	0.091
7	ERCC6 (G648E)	chr10:50691441:C:T	52.8	0.117
7	ERF (P242L)	chr19:42753539:G:A	16.8	0.093
7	ERG (R357H)	chr21:39755716:C:T	42.4	0.271
7	ERMP1 (P608S)	chr9:5805119:G:A	54	0.163
7	ERVV-2 (P279S)	chr19:53553339:C:T	54.8	0.092
7	ESCO1 (G768E)	chr18:19112506:C:T	40.6	0.063
7	ESRRG (P244H)	chr1:216737728:G:T	36.3	0.067
7	ETV3 (G205S)	chr1:157095559:C:T	44.4	0.053
7	EXOC3 (E628K)	chr5:465331:G:A	39.7	0.06
7	EXOG (W136*)	chr3:38542939:G:A	50.7	0.145
7	FAM111B (R120K)	chr11:58891929:G:A	27.4	0.065
7	FAM120B (N45I)	chr6:170626543:A:T	50.8	0.135
7	FAM129C (P198L)	chr19:17648257:C:T	46.7	0.164
7	FAM161A (E677K)	chr2:62053712:C:T	44.5	0.161
7	FAM168B (P113L)	chr2:131812982:G:A	49.8	0.115
7	FAM178A (G233E)	chr10:102676840:G:A	50.7	0.158
7	FAM216A (S181F)	chr12:110924444:C:T	55.2	0.059
7	FAM64A (G9R)	chr17:6348455:G:A	46.6	0.2
7	FAN1 (E223K)	chr15:31197533:G:A	52	0.109
7	FANCC (G474S)	chr9:97869461:C:T	47	0.124
7	FBN3 (Q2659*)	chr19:8137045:G:A	53.1	0.062
7	FBXL6 (E88K)	chr8:145581846:C:T	48	0.15
7	FEM1B (L255F)	chr15:68582459:C:T	54.7	0.068
7	FGD5 (G1088E)	chr3:14942567:G:A	53.2	0.095
7	FLNA (P2036S)	chrX:153581489:G:A	51.2	0.385
7	FLNC (P1581L)	chr7:128488851:C:T	31.6	0.053
7	FN1 (G1963A)	chr2:216240441:C:G	53.4	0.107
7	FOXA3 (G82D)	chr19:46375508:G:A	44.3	0.128
7	FRAS1 (P620L)	chr4:79238561:C:T	52.6	0.14
7	FRMD5 (T508I)	chr15:44166273:G:A	40.5	0.112
7	FSIP2 (M3178I)	chr2:186661130:G:A	51	0.225
7	GALNT14 (P42S)	chr2:31360829:G:A	36.7	0.067
7	GBP1 (G454E)	chr1:89521706:C:T	41	0.052
7	GCC1 (E424K)	chr7:127223126:C:T	40.5	0.068
7	GCNT1 (K307M)	chr9:79118217:A:T	50.7	0.142
7	GCNT6 (A54V)	chr6:10634153:C:T	53.4	0.062
7	GHR (G419E)	chr5:42718865:G:A	53	0.15
7	GLB1L2 (S427F)	chr11:134240966:C:T	32.1	0.06
7	GMPR (T223M)	chr6:16286037:C:T	51.8	0.088
7	GNB1 (G53E)	chr1:1747240:C:T	48.3	0.124
7	GNG4 (P64S)	chr1:235715447:G:A	52.6	0.058
7	GPR111 (P571S)	chr6:47650006:C:T	27.2	0.071
7	GPR125 (L1283P)	chr4:22389446:A:G	51.2	0.115
7	GPR125 (L1283F)	chr4:22389447:G:A	51.1	0.113
7	GPR88 (E342K)	chr1:101005546:G:A	36.2	0.07
7	GREB1 (G204E)	chr2:11716635:G:A	53.1	0.146
7	GTSE1 (E626D)	chr22:46724738:A:C	48.8	0.089
7	GXYLT1 (H157Y)	chr12:42512819:G:A	46.9	0.075
7	HGF (P537S)	chr7:81336613:G:A	39.7	0.167
7	HIATL1 (E371D)	chr9:97218606:G:C	49.8	0.159
7	HIVEP1 (F108C)	chr6:12120351:T:G	52.2	0.057
7	HLA-A (P217S)	chr6:29911928:C:T	18.8	0.059
7	HMGA1 (P288S)	chr6:34213267:C:T	51.6	0.093
7	HMGXB3 (T782I)	chr5:149417022:C:T	51.2	0.11
7	HMX3 (T269M)	chr10:124896979:C:T	21.3	0.086
7	HOOK1 (V115M)	chr1:60299146:G:A	53	0.074
7	HOXA4 (E22K)	chr7:27170289:C:T	52.3	0.107
7	HRH3 (S330L)	chr20:60791411:G:A	43.4	0.225
7	IDUA (G584E)	chr4:997371:G:A	38.3	0.052
7	IFFO1 (G365E)	chr12:6657978:C:T	51.9	0.132
7	IGSF8 (M574I)	chr1:160062076:C:T	19.6	0.068
7	IGSF9 (P831S)	chr1:159898687:G:A	41.4	0.076
7	IL10RB (P263S)	chr21:34660549:C:T	42.7	0.052
7	IL25 (R2K)	chr14:23842332:G:A	52.6	0.08
7	IMPA1 (D62N)	chr8:82593789:C:T	55	0.057
7	IMPG1 (Q155*)	chr6:76744343:G:A	40.4	0.134
7	INPP5D (P914L)	chr2:234106824:C:T	50.2	0.078
7	INPP5J (G226D)	chr22:31521402:G:A	52.9	0.123
7	INTS4 (D51N)	chr11:77702249:C:T	46.5	0.147
7	IRAK1 (L595F)	chrX:153278641:G:A	24.7	0.227
7	IRF2BP2 (T516I)	chr1:234743100:G:A	52.1	0.138
7	IRX3 (P485L)	chr16:54317650:G:A	50.2	0.125
7	ISM2 (H522P)	chr14:77942089:T:G	54.8	0.185
7	ITSN2 (S1031L)	chr2:24475242:G:A	54	0.068
7	IVNS1ABP (G360D)	chr1:185270145:C:T	53	0.073
7	KANK2 (S89F)	chr19:11304490:G:A	50.9	0.118
7	KCNC4 (G607D)	chr1:110774843:G:A	49	0.097
7	KDM5A (P1076L)	chr12:419120:G:A	20.8	0.059
7	KIF18B (P418S)	chr17:43009597:G:A	41.5	0.353
7	KIFC1 (G568E)	chr6:33374139:G:A	51.8	0.089
7	KIFC2 (E301K)	chr8:145693931:G:A	46.3	0.161
7	KLHL1 (G739D)	chr13:70275865:C:T	54.6	0.074
7	KLHL21 (G43S)	chr1:6662751:C:T	30.9	0.149
7	KLK13 (P116L)	chr19:51563243:G:A	51.6	0.092
7	KMT2A (S1388R)	chr11:118354975:T:G	40.4	0.06
7	KMT2B (P2351L)	chr19:36224666:C:T	42.5	0.081
7	KMT2D (P877L)	chr12:49444836:G:A	51.7	0.146
7	KMT2D (P774A)	chr12:49445146:G:C	48	0.063
7	KNG1 (Q165*)	chr3:186442978:C:T	52.9	0.082
7	KPTN (V151I)	chr19:47984289:C:T	47.6	0.081
7	LAMA2 (S2600F)	chr6:129807668:C:T	22.5	0.066
7	LAMA2 (G2932E)	chr6:129828725:G:A	47.4	0.122
7	LCT (T1279I)	chr2:136566081:G:A	52.3	0.113
7	LGI2 (S393F)	chr4:25005533:G:A	50.4	0.169
7	LHFPL5 (G104S)	chr6:35773757:G:A	53.3	0.073
7	LHX4 (E170K)	chr1:180240571:G:A	50.3	0.106
7	LMF1 (G181R)	chr16:961053:C:T	53.9	0.113
7	LMOD1 (S508F)	chr1:201868618:G:A	48.4	0.079
7	LPAR2 (T209I)	chr19:19737468:G:A	36.3	0.063
7	LPHN1 (G171S)	chr19:14274117:C:T	51.8	0.103
7	LRBA (W311C)	chr4:151836841:C:G	43.2	0.095
7	LRFN1 (G418D)	chr19:39804724:C:T	16.5	0.064
7	LRP12 (E483G)	chr8:105509332:T:C	54.7	0.099
7	LRP4 (G1128E)	chr11:46898170:C:T	48.3	0.078
7	LRRC66 (C858Y)	chr4:52860615:C:T	39.7	0.149
7	LRRK1 (M1572I)	chr15:101601412:G:A	26.4	0.067
7	LZTS2 (A17T)	chr10:102762344:G:A	49	0.143
7	MACF1 (L6650F)	chr1:39913439:C:T	50.2	0.072
7	MAGI1 (G1092E)	chr3:65350543:C:T	40.8	0.051
7	MALRD1 (D617N)	chr10:19636720:G:A	26.5	0.083
7	MAN1B1 (E485K)	chr9:140001229:G:A	48.6	0.124
7	MAP1B (S1690N)	chr5:71494251:G:A	50.5	0.134
7	MAP1B (S1710F)	chr5:71494311:C:T	40.9	0.212
7	MAP3K6 (G1044E)	chr1:27684018:C:T	37.6	0.063
7	MAP4K4 (E431K)	chr2:102472496:G:A	52.9	0.079
7	MAST4 (S206P)	chr5:66084596:T:C	36.6	0.143
7	MBD5 (R425K)	chr2:149226786:G:A	48.8	0.063
7	MCM5 (H238Y)	chr22:35804516:C:T	52.1	0.08
7	MDN1 (V2121M)	chr6:90428307:C:T	49	0.07
7	MEGF8 (G2433E)	chr19:42879687:G:A	51.5	0.115
7	MEGF9 (Y578C)	chr9:123367655:T:C	53.1	0.149
7	MFSD12 (A448V)	chr19:3544884:G:A	37	0.101
7	MGA (P2868S)	chr15:42058882:C:T	40.6	0.093
7	MGEA5 (A686T)	chr10:103553684:C:T	26.6	0.064
7	MIB2 (P786S)	chr1:1563911:C:T	43.3	0.128
7	MICAL1 (P830S)	chr6:109767489:G:A	29.9	0.065
7	MKI67 (D249N)	chr10:129913927:C:T	46.1	0.247
7	MKRN2 (G333S)	chr3:12623335:G:A	51.9	0.079
7	MMP21 (R94Q)	chr10:127462816:C:T	31.8	0.294
7	MN1 (P885L)	chr22:28193878:G:A	49.8	0.148
7	MOB1A (Q25*)	chr2:74399821:G:A	48	0.096
7	MOB1B (D104N)	chr4:71840889:G:A	36	0.11
7	MOBP (P163S)	chr3:39544234:C:T	51.9	0.162
7	MON2 (E55K)	chr12:62878001:G:A	33	0.072
7	MPEG1 (P163L)	chr11:58979851:G:A	31.8	0.103
7	MPEG1 (Q134H)	chr11:58979937:C:G	52.5	0.164
7	MPP3 (T122I)	chr17:41907408:G:A	48.5	0.103
7	MPP5 (M469I)	chr14:67786984:G:A	53.9	0.1
7	MRC2 (G31S)	chr17:60705254:G:A	19.7	0.076
7	MRC2 (N1311T)	chr17:60768042:A:C	46.3	0.052
7	MROH6 (G316E)	chr8:144652509:C:T	18.6	0.05
7	MRPL9 (G66E)	chr1:151735579:C:T	52.1	0.066
7	MTMR3 (S1006N)	chr22:30416665:G:A	51.5	0.14
7	MTSS1 (A37T)	chr8:125716396:C:T	52.1	0.125
7	MUS81 (V327I)	chr11:65631292:G:A	47.5	0.125
7	MYCBP2 (P2151L)	chr13:77739415:G:A	44.3	0.103
7	MYEF2 (G464D)	chr15:48441556:C:T	50.8	0.227
7	MYH4 (A34V)	chr17:10369962:G:A	47.6	0.612
7	MYO15A (E1355K)	chr17:18034577:G:A	50.6	0.115
7	MYO1E (D353N)	chr15:59510140:C:T	51.2	0.185
7	N6AMT2 (G74D)	chr13:21311868:C:T	53.2	0.084
7	NAALAD2 (G311E)	chr11:89892448:G:A	53	0.097
7	NACC1 (G38S)	chr19:13246133:G:A	19.8	0.051
7	NARG2 (L818F)	chr15:60728400:G:A	51.1	0.158
7	NAT8 (R159S)	chr2:73868279:C:G	51.1	0.142
7	NCAPH (V539I)	chr2:97030246:G:A	52.8	0.112
7	NCOA5 (P15A)	chr20:44699171:G:C	40.5	0.153
7	NDOR1 (P520S)	chr9:140110522:C:T	51.9	0.13
7	NDUFS6 (G159S)	chr5:1814741:G:A	51.3	0.139
7	NIPAL4 (L80F)	chr5:156890116:C:T	42.7	0.089
7	NLK (P40S)	chr17:26370017:C:T	16.5	0.07
7	NLRP4 (P43L)	chr19:56363574:C:T	50.4	0.078
7	NOD2 (S402Y)	chr16:50745027:C:A	53.7	0.33
7	NPC1 (H492Y)	chr18:21134801:G:A	51	0.065
7	NPHP3 (D120N)	chr3:132440842:C:T	51.9	0.104
7	NR1D1 (P255S)	chr17:38252182:G:A	47.9	0.148
7	NRDE2 (L1116F)	chr14:90745429:G:A	53.4	0.138
7	NUDCD2 (G143E)	chr5:162881019:C:T	53.2	0.129
7	NUFIP2 (V362I)	chr17:27613928:C:T	51.4	0.1
7	NUP188 (P606S)	chr9:131745591:C:T	52.8	0.076
7	NUP214 (P1531S)	chr9:134073469:C:T	49	0.122
7	NUP214 (V1625F)	chr9:134073751:G:T	48.7	0.112
7	NUP85 (P158S)	chr17:73211915:C:T	49.3	0.162
7	NUTM1 (L344F)	chr15:34646028:C:T	46.2	0.172
7	NYX (G379R)	chrX:41333841:G:A	46.3	0.385
7	OBSCN (R85H)	chr1:228399738:G:A	49.2	0.247
7	OCLN (G63E)	chr5:68805105:G:A	52.1	0.061
7	OR10D3 (Y60C)	chr11:124056155:A:G	51.6	0.213
7	ORC1 (S196N)	chr1:52861852:C:T	45.3	0.085
7	OTOF (V537M)	chr2:26703848:C:T	50.8	0.127
7	OTUD3 (H373Y)	chr1:20234159:C:T	51.4	0.091
7	PANX2 (P613L)	chr22:50617510:C:T	49.1	0.087
7	PAPLN (G974D)	chr14:73730978:G:A	51.7	0.237
7	PARD6G (P356S)	chr18:77917719:G:A	47.6	0.112
7	PARP4 (P1215L)	chr13:25016006:G:A	36.9	0.085
7	PCDH15 (G1348E)	chr10:55591234:C:T	51.1	0.162
7	PCDHA3 (L260V)	chr5:140181560:C:G	17.9	0.051
7	PCDHGA4 (V662M)	chr5:140736751:G:A	27	0.06
7	PCDHGB6 (G568S)	chr5:140789471:G:A	44.7	0.136
7	PCGF2 (P266S)	chr17:36891715:G:A	27.3	0.064
7	PCK1 (G457E)	chr20:56140147:G:A	50.7	0.106
7	PCSK5 (G1103S)	chr9:78910312:G:A	50	0.109
7	PCSK9 (G244S)	chr1:55518395:G:A	49.1	0.153
7	PDE1A (G392R)	chr2:183053787:C:T	53.2	0.092
7	PFAS (P1321S)	chr17:8172526:C:T	51.5	0.154
7	PHF23 (R113K)	chr17:7139908:C:T	37.9	0.055
7	PHKG2 (E213K)	chr16:30767583:G:A	52.6	0.178
7	PIK3C2G (S738N)	chr12:18552679:G:A	42.5	0.147
7	PIK3CA (D64N)	chr3:178916803:G:A	52.9	0.176
7	PIK3CD (H582R)	chr1:9780951:A:G	22.9	0.079
7	PITPNA (P92L)	chr17:1451604:G:A	45.7	0.101
7	PJA2 (P462L)	chr5:108704346:G:A	53.8	0.078
7	PKD1 (G3583S)	chr16:2143886:C:T	49.4	0.195
7	PKHD1 (S2080N)	chr6:51777257:C:T	50.6	0.053
7	PLCG2 (R1257K)	chr16:81991575:G:A	51.1	0.163
7	PLCH2 (P1226S)	chr1:2436077:C:T	39.7	0.116
7	PLEKHH3 (P776S)	chr17:40820201:G:A	43.1	0.123
7	PLEKHO2 (P312S)	chr15:65157548:C:T	21.2	0.055
7	PLXNA1 (D1526N)	chr3:126747090:G:A	25.3	0.079
7	PMEL (P307S)	chr12:56351168:G:A	48.6	0.109
7	PODN (G641S)	chr1:53547768:G:A	50.3	0.089
7	PODNL1 (P496L)	chr19:14043570:G:A	52.7	0.109
7	POGZ (P684S)	chr1:151381181:G:A	54.7	0.059
7	POR (G585S)	chr7:75615101:G:A	49	0.228
7	PPAN (V172M)	chr19:10220307:G:A	53.1	0.068
7	PPIL3 (T135I)	chr2:201741654:G:A	51.4	0.127
7	PPP1R12B (E935G)	chr1:202536952:A:G	32.6	0.054
7	PPP1R9B (P252S)	chr17:48227119:G:A	50.3	0.118
7	PPP2R5A (G259S)	chr1:212521741:G:A	54.6	0.109
7	PRDM8 (S615F)	chr4:81124460:C:T	46	0.256
7	PRDX1 (P11S)	chr1:45984685:G:A	48.8	0.141
7	PRKD1 (E350K)	chr14:30105662:C:T	54.8	0.113
7	PRPSAP2 (S233N)	chr17:18814529:G:A	16.8	0.077
7	PRR12 (P197L)	chr19:50098182:C:T	50.5	0.117
7	PRR14L (E1980D)	chr22:32099596:C:A	48.6	0.235
7	PRR19 (P204A)	chr19:42814431:C:G	51	0.057
7	PTP4A1 (G165D)	chr6:64290051:G:A	50.6	0.064
7	PTPN23 (L330F)	chr3:47449059:C:T	51.8	0.1
7	PTPN6 (G37S)	chr12:7060872:G:A	18.2	0.125
7	PTPRG (A465V)	chr3:62188863:C:T	45	0.084
7	PTPRS (P1507L)	chr19:5214469:G:A	52.7	0.088
7	PTPRS (T153I)	chr19:5265129:G:A	37.5	0.089
7	PTPRT (Q1188H)	chr20:40733242:C:G	52	0.074
7	PXDN (P795L)	chr2:1653168:G:A	51.7	0.149
7	QPCTL (P9L)	chr19:46195987:C:T	50.4	0.119
7	QSER1 (S1205F)	chr11:32956805:C:T	54.8	0.087
7	RAD51AP2 (W430*)	chr2:17698393:C:T	28	0.104
7	RAI1 (S21W)	chr17:17696324:C:G	54.6	0.078
7	RAI1 (G1873R)	chr17:17707121:G:A	51.5	0.161
7	RALGAPB (D1153N)	chr20:37187022:G:A	50.3	0.063
7	RAPH1 (S207P)	chr2:204354420:A:G	49.1	0.183
7	RASA2 (Y289C)	chr3:141289756:A:G	38.5	0.096
7	RASGRF1 (G1191E)	chr15:79265733:C:T	42.1	0.131
7	RASSF6 (P41S)	chr4:74477488:G:A	56	0.162
7	RBM47 (G384D)	chr4:40438637:C:T	27.4	0.108
7	RBM47 (P89L)	chr4:40440645:G:A	53.2	0.167
7	REPIN1 (G16E)	chr7:150066847:G:A	46.5	0.08
7	RET (P129S)	chr10:43597837:C:T	44.1	0.121
7	REXO4 (P145S)	chr9:136279924:G:A	51.2	0.08
7	RHOJ (N43S)	chr14:63671715:A:G	48.6	0.123
7	RNF20 (E80K)	chr9:104302593:G:A	42.8	0.059
7	RNF43 (R330*)	chr17:56436149:G:A	50	0.106
7	RNF6 (R343K)	chr13:26788991:C:T	49.9	0.068
7	ROMO1 (P7L)	chr20:34287574:C:T	52	0.137
7	RORC (P227S)	chr1:151787683:G:A	36	0.106
7	RP1 (E1551K)	chr8:55541093:G:A	41.5	0.084
7	RPL28 (P29L)	chr19:55897942:C:T	27.3	0.107
7	RPS6 (V18M)	chr9:19379571:C:T	53.6	0.125
7	RPSA (G234S)	chr3:39453444:G:A	20.8	0.14
7	RPTN (H438N)	chr1:152128263:G:T	54.5	0.31
7	RSPH4A (A450T)	chr6:116949218:G:A	55.2	0.105
7	RYR3 (P808L)	chr15:33916073:C:T	24.1	0.055
7	RYR3 (R2730I)	chr15:34040721:G:T	40.7	0.092
7	SACS (L3134F)	chr13:23908615:G:A	26.5	0.1
7	SALL4 (G538E)	chr20:50407409:C:T	36.7	0.067
7	SASH1 (S109F)	chr6:148761360:C:T	48.6	0.091
7	SBDS (Q152*)	chr7:66458209:G:A	30.7	0.07
7	SCML4 (P328S)	chr6:108029207:G:A	30.4	0.085
7	SCN10A (D513V)	chr3:38793927:T:A	16.1	0.052
7	SCN4A (P1555S)	chr17:62018979:G:A	42.3	0.073
7	SCNN1A (G335S)	chr12:6471266:C:T	36.9	0.26
7	SCO1 (P32S)	chr17:10600731:G:A	16.6	0.058
7	SDF2 (P91L)	chr17:26982381:G:A	26.5	0.071
7	SDF2L1 (S193T)	chr22:21998376:G:C	51.1	0.081
7	SELP (G660R)	chr1:169565286:C:T	21.5	0.067
7	SEMA6C (L945F)	chr1:151105016:G:A	41.4	0.057
7	SEMA7A (V391M)	chr15:74707011:C:T	52	0.113
7	SERP2 (G22E)	chr13:44948226:G:A	44.4	0.085
7	SESTD1 (D175N)	chr2:180014082:C:T	50.9	0.075
7	SETBP1 (P326S)	chr18:42530281:C:T	50	0.126
7	SETD1B (P747L)	chr12:122252361:C:T	47.6	0.279
7	SETD5 (P452L)	chr3:9486842:C:T	48.6	0.052
7	SF3A1 (D349H)	chr22:30737707:C:G	46.7	0.106
7	SGK1 (S517F)	chr6:134491437:G:A	51.5	0.128
7	SGK223 (G562E)	chr8:8234234:C:T	32.9	0.167
7	SHROOM1 (P365S)	chr5:132160455:G:A	41.5	0.121
7	SHROOM3 (P1109L)	chr4:77662652:C:T	38.3	0.261
7	SIDT2 (P418L)	chr11:117059454:C:T	39.8	0.058
7	SIGLEC6 (S189F)	chr19:52034075:G:A	25.2	0.125
7	SIK3 (P1177L)	chr11:116728630:G:A	51.4	0.084
7	SIRT7 (C266R)	chr17:79872190:A:G	32.8	0.052
7	SKOR1 (P389L)	chr15:68119332:C:T	54.4	0.101
7	SLC11A2 (E317K)	chr12:51389540:C:T	42.8	0.13
7	SLC13A3 (E104K)	chr20:45242166:C:T	50.5	0.188
7	SLC19A2 (V388M)	chr1:169437943:C:T	50.1	0.357
7	SLC23A3 (P533L)	chr2:220026890:G:A	32.7	0.068
7	SLC25A12 (T188I)	chr2:172693680:G:A	53.6	0.084
7	SLC25A23 (S218*)	chr19:6454476:G:C	52	0.075
7	SLC26A11 (P403S)	chr17:78220361:C:T	53.4	0.072
7	SLC2A1 (P58L)	chr1:43396819:G:A	48.8	0.098
7	SLC2A3 (G300D)	chr12:8078507:C:T	39.7	0.206
7	SLC30A9 (V472I)	chr4:42072704:G:A	28.1	0.096
7	SLC35A4 (L255F)	chr5:139947517:C:T	51.2	0.188
7	SLC38A5 (Q218*)	chrX:48320512:G:A	50	0.142
7	SLC39A10 (E586K)	chr2:196581420:G:A	43.6	0.081
7	SLC39A5 (G513E)	chr12:56631430:G:A	49.9	0.125
7	SLC44A3 (E129K)	chr1:95293169:G:A	42.6	0.103
7	SLC5A6 (W201*)	chr2:27428349:C:T	52	0.146
7	SLC6A15 (T36I)	chr12:85285793:G:A	54.4	0.064
7	SLC6A3 (P597L)	chr5:1401079:G:A	41.6	0.101
7	SLC6A4 (G83S)	chr17:28548730:C:T	46.3	0.127
7	SLMAP (S400L)	chr3:57857375:C:T	35.2	0.136
7	SMARCC2 (G810E)	chr12:56563679:C:T	42.7	0.094
7	SMC1B (V140I)	chr22:45802538:C:T	52.3	0.094
7	SMEK2 (V822I)	chr2:55777133:C:T	54.2	0.119
7	SMG5 (G161R)	chr1:156244451:C:T	51.1	0.1
7	SMG8 (K866E)	chr17:57290780:A:G	37.8	0.062
7	SMOX (P280L)	chr20:4162965:C:T	51.5	0.074
7	SMYD5 (D184N)	chr2:73448966:G:A	53.1	0.109
7	SMYD5 (E399K)	chr2:73453012:G:A	51.6	0.092
7	SNW1 (G417S)	chr14:78184873:C:T	48.7	0.078
7	SNX19 (G338E)	chr11:130784822:C:T	54.2	0.062
7	SNX2 (G24E)	chr5:122110869:G:A	43.6	0.051
7	SNX31 (R130K)	chr8:101629891:C:T	51.1	0.085
7	SOCS4 (Q390*)	chr14:55510927:C:T	53.6	0.123
7	SOGA2 (R823Q)	chr18:8784498:G:A	50.8	0.107
7	SOHLH1 (A106V)	chr9:138590203:G:A	49.2	0.122
7	SON (P599S)	chr21:34923332:C:T	49.8	0.118
7	SOSTDC1 (E30K)	chr7:16505206:C:T	41.5	0.183
7	SPEF2 (P556L)	chr5:35691281:C:T	49.9	0.062
7	SPEG (R2639Q)	chr2:220353277:G:A	34.6	0.052
7	SPEG (R2747H)	chr2:220353866:G:A	26.4	0.06
7	SPEN (R1350K)	chr1:16256784:G:A	54.3	0.061
7	SPHK2 (G723E)	chr19:49133754:G:A	27.6	0.087
7	SPOP (F102I)	chr17:47696644:A:T	28.9	0.053
7	SPTB (D2190N)	chr14:65220289:C:T	49.3	0.137
7	SRCAP (G2734E)	chr16:30749562:G:A	52.4	0.13
7	SRPR (G42E)	chr11:126137974:C:T	26.6	0.073
7	SRSF2 (P209L)	chr17:74732283:G:A	42.5	0.079
7	SSC5D (P1080L)	chr19:56028882:C:T	51.9	0.124
7	ST7L (P471S)	chr1:113093301:G:A	45.9	0.058
7	STAG2 (P5S)	chrX:123156490:C:T	51.5	0.295
7	STK38 (L162F)	chr6:36485524:G:A	43.8	0.054
7	STOX2 (E791G)	chr4:184932363:A:G	50.6	0.164
7	STX5 (P220L)	chr11:62592528:G:A	43.9	0.085
7	SUGT1 (R350K)	chr13:53261921:G:A	50.9	0.122
7	SUPV3L1 (E782K)	chr10:70968774:G:A	53.7	0.079
7	SYNE2 (L4505F)	chr14:64591887:C:T	53.3	0.113
7	SYNE4 (G253E)	chr19:36497434:C:T	49	0.155
7	SYTL2 (K1619N)	chr11:85411592:T:G	52	0.237
7	TAF10 (V80M)	chr11:6633044:C:T	51.3	0.151
7	TAF6 (E160K)	chr7:99711329:C:T	50.7	0.079
7	TANGO2 (G28S)	chr22:20024520:G:A	24.3	0.051
7	TAS1R3 (P466L)	chr1:1268422:C:T	33.8	0.05
7	TATDN2 (G48E)	chr3:10291027:G:A	53.3	0.11
7	TAX1BP1 (P70S)	chr7:27797695:C:T	53.6	0.105
7	TAX1BP1 (S690F)	chr7:27856569:C:T	52.6	0.187
7	TBC1D15 (G114E)	chr12:72274385:G:A	53.8	0.076
7	TBC1D15 (G249E)	chr12:72288503:G:A	48.2	0.105
7	TBC1D7 (V250I)	chr6:13306677:C:T	18.9	0.064
7	TBC1D8B (P909S)	chrX:106110089:C:T	48.2	0.438
7	TBC1D9 (R638T)	chr4:141580750:C:G	50.2	0.065
7	TCEANC (H180N)	chrX:13681075:C:A	53	0.096
7	TCF7L1 (G473E)	chr2:85536236:G:A	51.6	0.109
7	TCOF1 (V718M)	chr5:149755995:G:A	49.5	0.144
7	TCTN1 (V427I)	chr12:111080142:G:A	52	0.102
7	TEKT2 (E428K)	chr1:36553776:G:A	50.8	0.178
7	TFAP2A (P181L)	chr6:10404969:G:A	50.8	0.109
7	TFIP11 (G88E)	chr22:26902841:C:T	50.8	0.128
7	TGFBI (E336K)	chr5:135388688:G:A	51.6	0.093
7	THBS3 (P716S)	chr1:155167940:G:A	53.5	0.079
7	THBS4 (G444E)	chr5:79363932:G:A	34	0.1
7	THSD1 (E291D)	chr13:52971515:T:A	52	0.27
7	THSD7B (W670*)	chr2:137990563:G:A	41.6	0.113
7	TIE1 (G376E)	chr1:43774741:G:A	43.8	0.053
7	TLR7 (D41V)	chrX:12903749:A:T	50.1	0.083
7	TMBIM1 (T301I)	chr2:219140232:G:A	52.9	0.112
7	TMEM132D (G211E)	chr12:130184691:C:T	42.5	0.159
7	TMEM135 (S26F)	chr11:86749164:C:T	53	0.137
7	TMEM143 (V238M)	chr19:48846050:C:T	51	0.135
7	TMEM151B (G525R)	chr6:44244136:G:A	33.5	0.071
7	TMEM174 (P142S)	chr5:72469494:C:T	52.5	0.171
7	TMEM247 (E60K)	chr2:46707604:G:A	50.2	0.136
7	TNPO3 (G124R)	chr7:128657062:C:T	51.9	0.072
7	TNRC6C (G1409D)	chr17:76089773:G:A	52.6	0.108
7	TP53BP1 (L643F)	chr15:43748879:G:A	52.7	0.175
7	TRAF2 (E99K)	chr9:139794901:G:A	51	0.264
7	TRIM10 (P49S)	chr6:30128491:G:A	34.5	0.058
7	TRIM36 (G347E)	chr5:114473141:C:T	53.8	0.147
7	TRPM1 (G1377S)	chr15:31294825:C:T	53.6	0.175
7	TTLL4 (S544F)	chr2:219605277:C:T	50.8	0.183
7	TUBB (E157K)	chr6:30691308:G:A	54	0.074
7	TWSG1 (G110E)	chr18:9396383:G:A	46.8	0.109
7	UBC (E51K)	chr12:125398167:C:T	20.6	0.058
7	UBE2O (E830K)	chr17:74392530:C:T	49.5	0.057
7	UBE2Q2 (G197S)	chr15:76168528:G:A	50.3	0.157
7	UBTF (P99S)	chr17:42293297:G:A	43.1	0.069
7	UCK2 (G244A)	chr1:165877005:G:C	53.7	0.269
7	UNC5B (P423S)	chr10:73050839:C:T	52.7	0.108
7	UPF2 (Q1193*)	chr10:11973751:G:A	52.4	0.158
7	USP3 (S293P)	chr15:63862747:T:C	47.6	0.087
7	USP31 (P533L)	chr16:23098437:G:A	21.5	0.052
7	USP34 (S1461N)	chr2:61522163:C:T	44.8	0.082
7	USP8 (T675I)	chr15:50782512:C:T	52.1	0.169
7	VAV3 (P188S)	chr1:108313344:G:A	37.5	0.092
7	VPS13B (Q3918*)	chr8:100883857:C:T	15.7	0.067
7	VPS16 (A640V)	chr20:2845293:C:T	49.3	0.112
7	VRK1 (L155W)	chr14:97319257:T:G	50.6	0.264
7	VTI1A (R157K)	chr10:114428019:G:A	53.4	0.108
7	WDFY4 (V1167M)	chr10:49988087:G:A	45	0.099
7	WDR35 (P696L)	chr2:20138035:G:A	52	0.074
7	WDR41 (G8E)	chr5:76788023:C:T	53.9	0.12
7	WEE2 (A299V)	chr7:141422949:C:T	46.1	0.091
7	WNK1 (G2371S)	chr12:1005270:G:A	53	0.154
7	WRAP53 (P78L)	chr17:7592199:C:T	51.9	0.186
7	WSB1 (R88I)	chr17:25630446:G:T	54.1	0.057
7	WWTR1 (M267I)	chr3:149245727:C:T	47.6	0.216
7	XIRP1 (P581H)	chr3:39229195:G:T	50.4	0.11
7	XPO7 (P41S)	chr8:21824470:C:T	50.1	0.23
7	XRN1 (E617K)	chr3:142123783:C:T	53.6	0.16
7	YES1 (T231I)	chr18:745755:G:A	43.3	0.125
7	YIPF5 (M172I)	chr5:143541877:C:T	55	0.285
7	YLPM1 (G10E)	chr14:75230221:G:A	37.3	0.104
7	ZAN (S2096N)	chr7:100374159:G:A	53.8	0.089
7	ZBBX (T173I)	chr3:167068218:G:A	51.6	0.118
7	ZBTB22 (G571E)	chr6:33282982:C:T	51.5	0.09
7	ZC3HAV1 (V120I)	chr7:138774456:C:T	44.8	0.076
7	ZCCHC12 (G57E)	chrX:117959377:G:A	50.2	0.398
7	ZCCHC16 (T76P)	chrX:111698182:A:C	42.7	0.675
7	ZEB2 (P96L)	chr2:145187380:G:A	50.3	0.113
7	ZFHX3 (E40K)	chr16:72993927:C:T	51.7	0.209
7	ZFHX4 (P3304H)	chr8:77775861:C:A	51.4	0.074
7	ZIC5 (G517E)	chr13:100618073:C:T	51.6	0.172
7	ZMIZ1 (Y413C)	chr10:81056235:A:G	51.5	0.174
7	ZMYND8 (E164K)	chr20:45923508:C:T	54.3	0.111
7	ZNF112 (E272K)	chr19:44833565:C:T	49.1	0.099
7	ZNF233 (L635F)	chr19:44778716:C:T	38.8	0.174
7	ZNF251 (T484I)	chr8:145947594:G:A	26	0.086
7	ZNF263 (P321S)	chr16:3339467:C:T	51.5	0.118
7	ZNF337 (R648K)	chr20:25655981:C:T	39.7	0.086
7	ZNF33A (L574F)	chr10:38344754:C:T	53.8	0.069
7	ZNF385C (P405L)	chr17:40179700:G:A	49.9	0.176
7	ZNF432 (K163*)	chr19:52538445:T:A	50.3	0.172
7	ZNF460 (G157E)	chr19:57802379:G:A	54.1	0.069
7	ZNF469 (P3506S)	chr16:88504394:C:T	51	0.15
7	ZNF525 (W22*)	chr19:53879073:G:A	44.8	0.108
7	ZNF565 (H481Y)	chr19:36673547:G:A	51.6	0.099
7	ZNF608 (T101I)	chr5:124080381:G:A	52.4	0.122
7	ZNF696 (G98E)	chr8:144378138:G:A	51.2	0.089
7	ZNF703 (S339F)	chr8:37555435:C:T	52.8	0.116
7	ZNF709 (C338Y)	chr19:12575723:C:T	51.7	0.088
7	ZNF717 (T45I)	chr3:75790811:G:A	27.8	0.061
7	ZNF792 (V555I)	chr19:35449096:C:T	47.3	0.109
7	ZNF8 (C469Y)	chr19:58806580:G:A	52.6	0.119
7	ZNF805 (G191D)	chr19:57764759:G:A	51.6	0.097
7	ZNF841 (E100K)	chr19:52570837:C:T	52.6	0.082
7	ZNF865 (V778M)	chr19:56127316:G:A	15.4	0.115
7	ZXDA (G125R)	chrX:57936482:C:T	41.1	0.48
7	LZTR1 (H287Y)	chr22:21345984:C:T
8	ACADS (R272G)	chr12:121176354:C:G	50.5	0.277
8	ADAM28 (P81L)	chr8:24167690:C:T	54.3	0.341
8	AKAP9 (M96I)	chr7:91603228:G:A	49.4	0.144
8	AMBRA1 (R16*)	chr11:46569885:G:A	53.2	0.345
8	C11orf86 (I76M)	chr11:66743061:C:G	51.1	0.267
8	C2CD3 (P902S)	chr11:73811598:G:A	52.1	0.495
8	CDCP1 (E412K)	chr3:45136851:C:T	53.3	0.308
8	CDH5 (W51R)	chr16:66413391:T:A	52.8	0.294
8	CREBBP (L2330F)	chr16:3778060:G:A	51.6	0.481
8	ESCO2 (V325L)	chr8:27641534:G:C	52.5	0.295
8	FRS3 (R381C)	chr6:41738695:G:A	51.3	0.231
8	GABRA2 (E330*)	chr4:46264014:C:A	54.9	0.342
8	GDPD2 (P187S)	chrX:69646718:C:T	52.6	0.337
8	GEMIN5 (D866G)	chr5:154284102:T:C	52.3	0.273
8	LCAT (F289L)	chr16:67974263:G:T	51.5	0.151
8	LHCGR (W433R)	chr2:48915639:A:T	53.9	0.274
8	LILRA1 (P234S)	chr19:55107142:C:T	49.7	0.298
8	LPHN2 (D739N)	chr1:82432171:G:A	51.5	0.442
8	MTMR12 (L540V)	chr5:32233935:G:C	54.5	0.241
8	MYL2 (D48N)	chr12:111353546:C:T	50.8	0.313
8	MYO10 (R381S)	chr5:16766225:C:G	52.5	0.292
8	ODF1 (P238S)	chr8:103573071:C:T	40.5	0.456
8	PAK7 (E447D)	chr20:9546681:T:G	52.1	0.467
8	PCBP1 (A93V)	chr2:70315153:C:T	52.4	0.231
8	PROB1 (G577E)	chr5:138729041:C:T	49	0.245
8	PRRC2A (F1533L)	chr6:31601644:T:C	47.7	0.244
8	SCN2A (F14L)	chr2:166152373:T:C	53.8	0.322
8	SCN2A (F14S)	chr2:166152374:T:C	53.8	0.324
8	STRA6 (M663I)	chr15:74472553:C:T	52.3	0.306
8	SYDE1 (S382*)	chr19:15221401:C:A	48	0.367
8	TGS1 (D291H)	chr8:56699328:G:C	47.5	0.062
8	TIMELESS (Q716E)	chr12:56817204:G:C	49.1	0.343
8	TSHZ2 (P669A)	chr20:51872002:C:G	50.4	0.288
8	TTC39A (A591P)	chr1:51753900:C:G	45	0.387
8	UNK (E115*)	chr17:73805851:G:T	50.9	0.298
8	UPF1 (Q906H)	chr19:18974331:G:T	50.4	0.095
8	ZNF501 (N172S)	chr3:44776428:A:G	52.5	0.149
8	ZNF519 (L335F)	chr18:14105536:G:A	50.9	0.389
8	ZNF559 (K229R)	chr19:9452621:A:G	53.1	0.092
8	ZNF587 (N446K)	chr19:58371118:C:A	48.9	0.324
9	ADORA3 (R316K)	chr1:112028388:C:T	52.1	0.455
9	AKAP13 (V394L)	chr15:86122479:G:C	50.6	0.447
9	ATF6 (V288M)	chr1:161772015:G:A	47.8	0.416
9	CHML (E651G)	chr1:241797117:T:C	42	0.48
9	CNTNAP2 (P258L)	chr7:146818089:C:T	45.2	0.264
9	DNAH9 (K2428R)	chr17:11671882:A:G	50.1	0.442
9	EIF4G3 (E376D)	chr1:21268369:C:G	52	0.386
9	EIF4G3 (D340H)	chr1:21268479:C:G	45.3	0.424
9	ERC1 (A64D)	chr12:1137260:C:A	51.5	0.431
9	ESCO2 (K287T)	chr8:27634685:A:C	47.2	0.955
9	FMNL2 (R1035*)	chr2:153497362:C:T	50.6	0.407
9	GAS2 (N245S)	chr11:22833354:A:G	49.5	0.307
9	GLE1 (L79V)	chr9:131271290:C:G	51.3	0.38
9	KCTD5 (G23fs)	chr16:2732608:T:TG	43.8	0.762
9	KRT12 (D293N)	chr17:39020047:C:T	39.3	0.286
9	KSR2 (P277L)	chr12:118198972:G:A	43	0.466
9	LIMD1 (S235R)	chr3:45637074:A:C	49.9	0.404
9	MAP4K4 (R152G)	chr2:102446002:C:G	53.6	0.425
9	MAP4K4 (R277G)	chr2:102456336:C:G	38.7	0.434
9	MGAM (S1100T)	chr7:141754693:G:C	49.7	0.201
9	MYBPC1 (L258I)	chr12:102038456:C:A	51.4	0.397
9	NRXN1 (L981F)	chr2:50724527:T:G	43.8	0.089
9	PDP2 (V423G)	chr16:66919455:T:G	41.3	0.381
9	POTEC (K289I)	chr18:14534951:T:A	23.3	0.208
9	REPIN1 (R241Q)	chr7:150068881:G:A	51.9	0.329
9	RIC8A (V53A)	chr11:209432:T:C	52.4	0.444
9	RNF121 (V294G)	chr11:71707258:T:G	44.2	0.477
9	SAMD3 (L408F)	chr6:130467198:C:G	48.9	0.882
9	SCN7A (N899K)	chr2:167285680:A:C	45.6	0.567
9	SCN7A (G419E)	chr2:167313414:C:T	46.2	0.426
9	SERPINB9 (V338I)	chr6:2890516:C:T	51.3	0.467
9	SHPK (A2G)	chr17:3539509:G:C	50.3	0.488
9	SPRED1 (G29fs)	chr15:38591623:A:AGT	40.2	0.785
9	STAG1 (D412Y)	chr3:136183802:C:A	47.8	0.371
9	SULF1 (A652V)	chr8:70540014:C:T	50.5	0.154
9	TANGO2 (D286H)	chr22:20052087:G:C	52.5	0.125
9	TMPRSS5 (C401G)	chr11:113560958:A:C	42.7	0.875
9	TNC (H102Y)	chr9:117852994:G:A	54.1	0.392
9	TTBK2 (D387E)	chr15:43075653:A:C	49.2	0.436
9	TUBGCP6 (S999L)	chr22:50659792:G:A	45.7	0.464
9	VIM (V84A)	chr10:17271672:T:C	45.3	0.81
9	ZNF106 (N1575S)	chr15:42727670:T:C	45.7	0.456
9	ZNF35 (I355M)	chr3:44700920:C:G	53.8	0.413
10	ACAP3 (A661V)	chr1:1229939:G:A	47.2	0.4
10	ALPK3 (G1022A)	chr15:85400428:G:C	43.6	0.395
10	ARRB1 (E389K)	chr11:74977299:C:T	53.3	0.375
10	ARRB1 (E378*)	chr11:74978709:C:A	47.3	0.252
10	ARRB1 (E364K)	chr11:74979936:C:T	51.3	0.345
10	ATP1A1 (K840Q)	chr1:116942111:A:C	51.8	0.267
10	BBX (R23*)	chr3:107429374:C:T	56	0.297
10	BEST3 (G226S)	chr12:70070998:C:T	49.7	0.315
10	CADM2 (A202V)	chr3:85961619:C:T	52	0.331
10	CBX2 (R92C)	chr17:77755586:C:T	51.6	0.41
10	CCDC171 (D613N)	chr9:15728011:G:A	49.4	0.338
10	COL22A1 (G1183A)	chr8:139648992:C:G	55	0.123
10	DDX60L (V40fs)	chr4:169393044:C:CA	53.3	0.299
10	DZIP3 (A114fs)	chr3:108335464:T:TAGAA	51.7	0.207
10	EID1 (E163*)	chr15:49170860:G:T	53.2	0.334
10	FLNB (C32G)	chr3:57994385:T:G	51.2	0.41
10	FOXC1 (A32G)	chr6:1610775:C:G	42.8	0.333
10	GPR98 (S2491F)	chr5:89990045:C:T	52.8	0.339
10	HKR1 (S219C)	chr19:37853353:C:G	53.7	0.177
10	IL9R (P174L)	chrX:155234172:C:T	39.1	0.385
10	KCNA7 (L69F)	chr19:49575638:G:A	53.3	0.686
10	LRRIQ1 (N850S)	chr12:85460530:A:G	52.3	0.315
10	MCF2 (W945*)	chrX:138670568:C:T	45.7	0.75
10	MEN1 (A24P)	chr11:64577512:C:G	51.9	0.468
10	MGAM (R1144T)	chr7:141755474:G:C	53.4	0.367
10	NACA (S577P)	chr12:57113585:A:G	52.6	0.322
10	NEURL1B (A246G)	chr5:172110581:C:G	49.1	0.327
10	NHSL2 (L603V)	chrX:71359205:C:G	48.2	0.75
10	NLRP4 (I868T)	chr19:56388439:T:C	52.6	0.226
10	NR2C2 (Q537*)	chr3:15080670:C:T	47.5	0.205
10	NUDT16L1 (P22S)	chr16:4743791:C:T	51.8	0.41
10	OSBPL6 (V130A)	chr2:179197384:T:C	53.9	0.285
10	PC (A798T)	chr11:66618226:C:T	51.6	0.548
10	PCDH12 (A148T)	chr5:141336975:C:T	48.8	0.36
10	PCDHB3 (D237V)	chr5:140480943:A:T	54.1	0.362
10	PLA2R1 (K1350N)	chr2:160801511:C:A	54.2	0.318
10	POLR3C (S264fs)	chr1:145601615:CT:C	48.7	0.15
10	RAG2 (N391S)	chr11:36614547:T:C	54.9	0.332
10	RBMXL2 (D259N)	chr11:7111126:G:A	54.7	0.341
10	RGS9 (S533L)	chr17:63221310:C:T	53	0.373
10	SLC25A29 (C110S)	chr14:100759203:C:G	51.1	0.203
10	SYNE1 (E8353K)	chr6:152464820:C:T	52.1	0.625
10	TRPM3 (S82N)	chr9:73479366:C:T	51.1	0.361
10	TRRAP (R1681H)	chr7:98547392:G:A	51.2	0.341
10	TULP2 (S432N)	chr19:49385441:C:T	52.1	0.219
10	USP53 (T1048S)	chr4:120214286:A:T	54.4	0.339
10	ZSCAN18 (P335Q)	chr19:58597543:G:T	54.5	0.163
11	AGK (P202S)	chr7:141333716:C:T	49.2	0.156
11	AGK (S213F)	chr7:141333750:C:T	46.2	0.162
11	B4GALT2 (V3L)	chr1:44445690:G:C	37.8	0.087
11	BZRAP1 (R1793Q)	chr17:56382803:C:T	53.7	0.074
11	C10orf54 (R90H)	chr10:73521597:C:T	36.6	0.064
11	C1orf51 (I321V)	chr1:150259169:A:G	54.2	0.129
11	CAPN15 (R540W)	chr16:599161:C:T	49.3	0.135
11	CEP350 (L1882F)	chr1:180044235:A:C	45.8	0.059
11	DNAH9 (A3091P)	chr17:11737979:G:C	50	0.142
11	DSG2 (A327D)	chr18:29104817:C:A	53.8	0.087
11	ENDOG (R285P)	chr9:131584849:G:C	50.2	0.108
11	ERMP1 (I609M)	chr9:5805114:G:C	54.4	0.097
11	FCGBP (N897S)	chr19:40421231:T:C	51.1	0.126
11	GABRP (R200L)	chr5:170232777:G:T	51.2	0.145
11	GHR (I127V)	chr5:42695131:A:G	53.6	0.125
11	GNS (F38I)	chr12:65152945:A:T	45.5	0.29
11	GTDC1 (C222Y)	chr2:144764959:C:T	53.2	0.109
11	IRF2BPL (S674P)	chr14:77492116:A:G	51.3	0.265
11	KCNH1 (T599M)	chr1:210970969:G:A	50.2	0.099
11	LMO7 (Q1489*)	chr13:76423373:C:T	21.2	0.059
11	MRPS27 (L351*)	chr5:71516971:A:T	52.5	0.092
11	MTNR1A (I174M)	chr4:187455374:G:C	39.2	0.143
11	NPSR1 (N298K)	chr7:34888144:T:G	51.9	0.127
11	NUP210 (Q418P)	chr3:13417831:T:G	45.5	0.306
11	PDE11A (G80V)	chr2:178936926:C:A	30.2	0.098
11	PELI3 (P344L)	chr11:66243259:C:T	31.2	0.149
11	PREX2 (S1167T)	chr8:69031745:G:C	54.1	0.11
11	PRKD3 (G545W)	chr2:37501582:C:A	50.1	0.13
11	PRSS16 (T433N)	chr6:27222619:C:A	51.5	0.116
11	PSTPIP2 (Ter335Yext*?)	chr18:43568676:T:G	55.1	0.12
11	RGSL1 (D893Y)	chr1:182517459:G:T	51.7	0.139
11	RGSL1 (Q902R)	chr1:182517487:A:G	53.2	0.129
11	SORCS1 (R977Q)	chr10:108371772:C:T	32.3	0.081
11	SPATC1 (S428R)	chr8:145095984:A:C	46.1	0.087
11	TNFRSF11A (M56I)	chr18:60017055:G:A	50.8	0.156
11	TUBB6 (G35S)	chr18:12308731:G:A	44.9	0.213
11	VIT (V476M)	chr2:37035651:G:A	52	0.15
11	WDR91 (R104K)	chr7:134893743:C:T	49.1	0.308
11	TP53 (R248W)	chr17:7577539:G:A	30.7	0.095
12	ABCA13 (A4196T)	chr7:48494654:G:A	41.1	0.471
12	ARHGEF38 (D661Y)	chr4:106588693:G:T	54.2	0.398
12	CFTR (A72V)	chr7:117149138:C:T	50.8	0.392
12	CNTNAP3 (R652C)	chr9:39133055:G:A	42.2	0.7
12	CSMD1 (S2823C)	chr8:2836236:T:A	54	0.44
12	CTC1 (R542Q)	chr17:8137966:C:T	52	0.315
12	EDNRB (F121L)	chr13:78492618:A:G	49.9	0.227
12	GPLD1 (S84T)	chr6:24476489:A:T	50.5	0.457
12	IGDCC3 (A135P)	chr15:65667441:C:G	51	0.157
12	KLHL41 (A260T)	chr2:170367066:G:A	51.2	0.469
12	MRC2 (S1404P)	chr17:60769490:T:C	50.5	0.393
12	MTRF1 (Q57R)	chr13:41834913:T:C	52.1	0.711
12	MUM1 (W17*)	chr19:1356438:G:A	51.8	0.511
12	SLC6A18 (W581*)	chr5:1246049:G:A	49.2	0.092
12	SMCR8 (M382L)	chr17:18220247:A:T	51.6	0.347
12	SNAP29 (S61G)	chr22:21213579:A:G	52	0.17
12	SRL (P440L)	chr16:4242257:G:A	51.5	0.457
12	TERT (F919L)	chr5:1264607:A:G	53.1	0.093
12	WDFY3 (F3348S)	chr4:85600176:A:G	52.9	0.496
13	AIFM1 (K562N)	chrX:129264029:T:G	51.2	0.479
13	AKAP13 (P1459A)	chr15:86198648:C:G	42.3	0.187
13	AKAP13 (F1605V)	chr15:86207795:T:G	48.1	0.247
13	ALAS2 (K87M)	chrX:55051195:T:A	48.1	0.413
13	ANKRD30B (P910S)	chr18:14842901:C:T	45.9	0.078
13	ARHGAP35 (P1257T)	chr19:47440608:C:A	51.8	0.234
13	ARSF (V391A)	chrX:3021872:T:C	48.1	0.433
13	ARVCF (D789G)	chr22:19960714:T:C	50	0.25
13	ATAD2B (D1022V)	chr2:24005807:T:A	51.6	0.176
13	CHRDL2 (Y49H)	chr11:74429815:A:G	48.3	0.219
13	CWF19L2 (R482H)	chr11:107289002:C:T	55.3	0.257
13	CYP20A1 (T227N)	chr2:204137448:C:A	50.5	0.409
13	FADS3 (S131I)	chr11:61646914:C:A	50.4	0.275
13	FSIP2 (M6849I)	chr2:186678724:G:T	53.2	0.085
13	HERC1 (S2747C)	chr15:63958638:G:C	52.1	0.183
13	HERC1 (I1644M)	chr15:63988512:G:C	51.6	0.3
13	INADL (M946I)	chr1:62340917:G:T	42.7	0.215
13	IRAK4 (I327T)	chr12:44176148:T:C	53.1	0.326
13	LRP2 (W2322*)	chr2:170063264:C:T	53.6	0.199
13	MAU2 (Y174H)	chr19:19449717:T:C	51.6	0.287
13	MLIP (S146F)	chr6:53989455:C:T	53.9	0.196
13	NCOA1 (G1416*)	chr2:24991180:G:T	51.6	0.25
13	RPRD2 (L687*)	chr1:150443484:T:G	52.3	0.288
13	RTN1 (V236L)	chr14:60212735:C:G	54.4	0.194
13	SEC14L5 (E359K)	chr16:5050871:G:A	49.5	0.182
13	SLC18A3 (A433V)	chr10:50820084:C:T	51.3	0.175
13	SPINK5 (K523R)	chr5:147486688:A:G	44.7	0.262
13	SYT2 (A67D)	chr1:202573728:G:T	48.1	0.109
13	TARSL2 (V518A)	chr15:102224375:A:G	53.2	0.269
13	ZNF763 (R352S)	chr19:12089735:G:C	53.4	0.208
13	LZTR1 (N150fs)	chr22:21342342:TA:T	51.3	0.335
14	ANKRD17 (P2169R)	chr4:73956839:G:C	51.1	0.363
14	ASB12 (Q41E)	chrX:63445410:G:C	45.6	0.327
14	ATG2B (Q765E)	chr14:96792130:G:C	52.3	0.336
14	CACNA1S (A518T)	chr1:201047074:C:T	22.1	0.091
14	DOCK2 (D651H)	chr5:169143226:G:C	49.4	0.673
14	FCER1A (Q205K)	chr1:159277561:C:A	53	0.277
14	FMN2 (P859T)	chr1:240370687:C:A	53.7	0.41
14	FNDC5 (A107V)	chr1:33333880:G:A	51.2	0.289
14	KIF13B (P963A)	chr8:28989880:G:C	41.5	0.07
14	KRT74 (A251P)	chr12:52965235:C:G	47.7	0.409
14	KRT82 (S468R)	chr12:52788897:G:T	50.4	0.138
14	NKPD1 (V405I)	chr19:45656482:C:T	49.8	0.465
14	NOC4L (L413F)	chr12:132636287:G:C	52.2	0.109
14	PLBD2 (W165*)	chr12:113810563:G:A	51.1	0.158
14	PLBD2 (M170I)	chr12:113810579:G:A	50.2	0.141
14	PLCD4 (K328T)	chr2:219494250:A:C	51.3	0.417
14	SBF1 (R1807C)	chr22:50885983:G:A	46.2	0.476
14	SNUPN (T132N)	chr15:75909783:G:T	51.3	0.363
14	TMEM132E (T582M)	chr17:32963063:C:T	26.7	0.4
14	TNFRSF1B (P91H)	chr1:12251107:C:A	51	0.384
14	WDFY3 (I2362V)	chr4:85654672:T:C	50.9	0.371
14	ZFP36L2 (Y192N)	chr2:43452369:A:T	53.3	0.759
14	ZNF318 (R928S)	chr6:43316352:G:T	50.7	0.23
14	ZNF500 (G287S)	chr16:4802961:C:T	50.3	0.372
15	AAK1 (S447F)	chr2:69746243:G:A	46.4	0.404
15	ADH1A (S266L)	chr4:100203534:G:A	55	0.069
15	ALKBH4 (A173V)	chr7:102098232:G:A	50.3	0.319
15	ASXL3 (P570H)	chr18:31319077:C:A	52.5	0.082
15	ATP10D (E412K)	chr4:47538793:G:A	52.7	0.176
15	AUTS2 (P942L)	chr7:70255027:C:T	46.8	0.373
15	C10orf120 (D310N)	chr10:124457329:C:T	55.4	0.361
15	CCDC141 (M745I)	chr2:179734003:C:T	50.5	0.346
15	CCDC147 (S643fs)	chr10:106160545:G:GGA	42.8	0.242
15	CCR2 (D137N)	chr3:46399427:G:A	53.7	0.079
15	CEP120 (P633S)	chr5:122718547:G:A	43	0.056
15	CLIP3 (R379W)	chr19:36509848:G:A	46.4	0.321
15	COG4 (T162S)	chr16:70548298:T:A	48.5	0.168
15	CREB3L3 (G397R)	chr19:4171769:G:A	49.7	0.119
15	CRISP3 (P36Q)	chr6:49705096:G:T	49.9	0.076
15	CT62 (G35S)	chr15:71404519:C:T	50.8	0.224
15	CUX2 (G841E)	chr12:111758335:G:A	46.8	0.267
15	DPP8 (H798Y)	chr15:65744368:G:A	51.7	0.303
15	DYNLRB2 (R87C)	chr16:80583473:C:T	40.6	0.294
15	EDEM3 (H454Y)	chr1:184686032:G:A	52.4	0.247
15	EPHA6 (F311C)	chr3:96706655:T:G	54.2	0.245
15	FAM47C (E669K)	chrX:37028488:G:A	45.3	0.564
15	FAM9A (Q160fs)	chrX:8764319:G:GT	27.8	0.132
15	FBLN1 (T669I)	chr22:45958986:C:T	49.7	0.11
15	FBXW2 (H333Y)	chr9:123533705:G:A	49.5	0.083
15	FGF5 (G196E)	chr4:81207606:G:A	51.2	0.212
15	FOXO1 (R619W)	chr13:41133773:G:A	53.2	0.073
15	FRY (R1875W)	chr13:32808806:C:T	51.2	0.107
15	GBP1 (Q438*)	chr1:89521755:G:A	52.7	0.179
15	GIGYF2 (P1232fs)	chr2:233712226:CA:C	36.1	0.667
15	GLDC (E77K)	chr9:6645271:C:T	48.1	0.197
15	GPR112 (P1155S)	chrX:135429328:C:T	46.4	0.534
15	GPR112 (S2235L)	chrX:135432569:C:T	49.8	0.116
15	GPR179 (V123G)	chr17:36499305:A:C	52.6	0.337
15	GRHL3 (S56N)	chr1:24658065:G:A	48.7	0.077
15	GRID2 (P779S)	chr4:94547561:C:T	48.8	0.055
15	IL37 (H47Y)	chr2:113671425:C:T	52	0.16
15	ITLN1 (W29*)	chr1:160853289:C:T	47.5	0.068
15	JPH4 (D11Y)	chr14:24046632:C:A	42.2	0.186
15	KCNMA1 (E1025K)	chr10:78669798:C:T	51	0.227
15	KCNT2 (R345*)	chr1:196395070:G:A	54.7	0.088
15	KCTD16 (S199F)	chr5:143586873:C:T	52.7	0.151
15	KIF21B (E586K)	chr1:200969022:C:T	42.7	0.061
15	KRT8 (S59A)	chr12:53298675:A:C	35	0.171
15	LILRA2 (P203S)	chr19:55086452:C:T	51.4	0.102
15	LIN28B (H65L)	chr6:105406157:A:T	49.3	0.227
15	LRRC36 (P321S)	chr16:67401126:C:T	54.5	0.155
15	MNDA (R83Q)	chr1:158812191:G:A	53.2	0.27
15	MS4A2 (G62R)	chr11:59857292:G:A	52.2	0.174
15	MS4A2 (G62E)	chr11:59857293:G:A	52.2	0.176
15	MTPAP (H66Y)	chr10:30653986:G:A	47.1	0.439
15	MXRA5 (P953S)	chrX:3240869:G:A	34.4	0.222
15	MYO5B (E1045K)	chr18:47405458:C:T	51.7	0.079
15	NAMPTL (G109E)	chr10:36812837:C:T	54.3	0.273
15	NAV2 (T932S)	chr11:20005751:C:G	47	0.276
15	NCKAP5 (P768S)	chr2:133542082:G:A	53.8	0.273
15	NEUROD1 (D78N)	chr2:182543356:C:T	52.5	0.095
15	NME8 (E587K)	chr7:37936686:G:A	53.9	0.141
15	PARM1 (S95L)	chr4:75937875:C:T	53	0.185
15	PCDHB17 (G380E)	chr5:140536715:G:A	53.5	0.19
15	PCDHGB4 (L682F)	chr5:140769495:C:T	50	0.278
15	PDE8B (R300K)	chr5:76645266:G:A	47	0.2
15	PDXDC1 (K39R)	chr16:15091650:A:G	46	0.067
15	PLAC8 (R104K)	chr4:84015877:C:T	53.5	0.102
15	PLCB1 (D434N)	chr20:8696960:G:A	53.8	0.301
15	PLCG2 (G333S)	chr16:81927324:G:A	49.2	0.149
15	PLTP (R271W)	chr20:44533712:G:A	52.7	0.318
15	PRDM15 (E1327fs)	chr21:43222932:CT:C	53.6	0.251
15	PRDM15 (K1326R)	chr21:43222936:T:C	48.8	0.244
15	PRKCQ (G254R)	chr10:6533675:C:T	47.6	0.404
15	PRSS1 (G205E)	chr7:142460399:G:A	50.1	0.348
15	PSMA6 (H68Y)	chr14:35778150:C:T	53.4	0.303
15	PTPRQ (G64R)	chr12:80839297:G:A	35.8	0.057
15	RASGRP3 (W653*)	chr2:33783992:G:A	23.4	0.08
15	REEP3 (P19S)	chr10:65326120:C:T	42	0.063
15	RGL1 (S636F)	chr1:183885633:C:T	54.5	0.293
15	RICTOR (S1598F)	chr5:38945083:G:A	54.2	0.129
15	RPGRIP1 (R768Q)	chr14:21793478:G:A	49.8	0.118
15	RYR1 (D856N)	chr19:38951220:G:A	28.1	0.176
15	SCN11A (M1336I)	chr3:38904734:C:T	47.6	0.294
15	SGSM1 (D983N)	chr22:25301118:G:A	52	0.236
15	SIGLEC11 (Q547*)	chr19:50461552:G:A	54	0.058
15	SIPA1L1 (R297C)	chr14:72055478:C:T	35.6	0.056
15	SLC36A2 (D39N)	chr5:150726907:C:T	50.7	0.286
15	SMG5 (V983G)	chr1:156220668:A:C	46.4	0.333
15	SND1 (E905K)	chr7:127732090:G:A	54.6	0.172
15	SORL1 (D1267N)	chr11:121457023:G:A	49.4	0.448
15	SPANXN1 (E11K)	chrX:144329137:G:A	52.8	0.128
15	SPANXN5 (R32M)	chrX:52825652:C:A	48.2	0.359
15	SYNE1 (T3801I)	chr6:152673340:G:A	49.8	0.234
15	TENM4 (Q1897K)	chr11:78383182:G:T	51.1	0.187
15	TNKS1BP1 (A506V)	chr11:57080645:G:A	50.2	0.465
15	TNRC18 (P2136L)	chr7:5363880:G:A	24.9	0.123
15	TRIOBP (S637F)	chr22:38120473:C:T	54.5	0.051
15	USH2A (P3873S)	chr1:215914811:G:A	53.1	0.078
15	ZDBF2 (D1326N)	chr2:207173228:G:A	28.8	0.067
15	ZNF35 (M161T)	chr3:44700337:T:C	55.1	0.094
15	ZNF385A (S75F)	chr12:54769662:G:A	51.2	0.299
15	ZNF679 (H262Y)	chr7:63726795:C:T	22.8	0.077
15	ZNF69 (G310E)	chr19:12016141:G:A	51	0.293
17	C1orf65 (V218I)	chr1:223567469:G:A	53.3	0.135
17	CASZ1 (G371W)	chr1:10719988:C:A	50.3	0.283
17	CASZ1 (E240K)	chr1:10720381:C:T	52.9	0.216
17	CASZ1 (D176H)	chr1:10720573:C:G	51.7	0.201
17	GPBP1L1 (A289T)	chr1:46099788:C:T	32.9	0.061
17	LRRC40 (M219I)	chr1:70646773:C:T	45.6	0.223
17	MECOM (H991R)	chr3:168812884:T:C	47.8	0.208
17	MTMR12 (W524C)	chr5:32233981:C:G	54	0.088
17	OBSCN (V1711M)	chr1:228447471:G:A	52.1	0.167
17	PRSS58 (E176G)	chr7:141952341:T:C	53.7	0.071
17	PTCHD2 (C499*)	chr1:11575469:C:A	45	0.117
17	TTLL5 (Y350H)	chr14:76198686:T:C	54	0.091
17	XPO4 (C838Y)	chr13:21371006:C:T	49.6	0.141
17	ZFYVE9 (R1334T)	chr1:52810501:G:C	53.9	0.093
19	ARHGEF25 (R11C)	chr12:58004030:C:T	39.7	0.222
19	ATP1A3 (G452V)	chr19:42485775:C:A	49.3	0.112
19	C9orf131 (P840L)	chr9:35045145:C:T	42.2	0.124
19	CALCRL (M53T)	chr2:188247926:A:G	55.4	0.403
19	CARS2 (G213V)	chr13:111335415:C:A	38.4	0.5
19	CLK2 (G175S)	chr1:155238115:C:T	44.6	0.493
19	ELF2 (S344P)	chr4:139981605:A:G	49.5	0.182
19	EML5 (R1649P)	chr14:89089015:C:G	49.5	0.214
19	FRAT1 (R218Q)	chr10:99079863:G:A	29.6	0.088
19	HARS2 (L4fs)	chr5:140071241:T:TG	27.8	0.095
19	HIST1H1A (K112N)	chr6:26017625:C:G	50.7	0.119
19	KCNC2 (T579M)	chr12:75441977:G:A	55.3	0.339
19	KDM2A (R325H)	chr11:66995524:G:A	45.2	0.096
19	MFSD12 (Q263*)	chr19:3547896:G:A	40.3	0.584
19	MGAM (G483R)	chr7:141730534:G:A	51.4	0.261
19	NF1 (E2578*)	chr17:29683594:G:T	51.8	0.263
19	NKAIN1 (S123P)	chr1:31656768:A:G	47.7	0.143
19	NSD1 (E1088K)	chr5:176638662:G:A	41	0.265
19	NTRK2 (S740I)	chr9:87635167:G:T	46.8	0.25
19	OLR1 (G220S)	chr12:10312968:C:T	41.1	0.125
19	OSR1 (G135S)	chr2:19553164:C:T	48.6	0.261
19	PCSK5 (D625E)	chr9:78790020:C:A	53.5	0.166
19	PIGN (L862F)	chr18:59742047:G:A	46.3	0.292
19	PKD2 (M241V)	chr4:88957383:A:G	50.3	0.252
19	QRICH2 (T1341M)	chr17:74276474:G:A	46	0.151
19	SATB2 (R543H)	chr2:200173595:C:T	52.4	0.162
19	SEMA4A (G697V)	chr1:156146592:G:T	47.6	0.132
19	SFXN3 (A189T)	chr10:102796525:G:A	49	0.223
19	ST6GAL1 (Q61*)	chr3:186760672:C:T	48.1	0.225
19	TACR3 (R425W)	chr4:104510964:G:A	54.3	0.159
19	TACSTD2 (N39S)	chr1:59042713:T:C	26	0.13
19	TECTB (V260L)	chr10:114057933:G:C	48	0.43
19	TENM4 (A2694D)	chr11:78369332:G:T	25.1	0.051
19	TNPO3 (R648H)	chr7:128622320:C:T	51.2	0.186
19	TPRX2P (Q108*)	chr19:48364110:C:T	39.4	0.429
19	TRHDE (Y468S)	chr12:72866914:A:C	54.4	0.239
19	TTBK2 (E951A)	chr15:43044592:T:G	51.3	0.097
19	TTLL4 (P389S)	chr2:219603564:C:T	22.2	0.066
19	UBFD1 (A498V)	chr16:23581802:C:T	47.2	0.193
19	VGF (A94fs)	chr7:100807844:G:GCGTC	45.3	0.18
19	WARS (A224V)	chr14:100820078:G:A	50.2	0.438
19	XIRP2 (E3261K)	chr2:168107683:G:A	46.6	0.421
19	ZCCHC2 (E496G)	chr18:60225998:A:G	49.1	0.222
19	ZNF493 (L61V)	chr19:21588586:C:G	51	0.341
19	ZNF595 (E84*)	chr4:60267:G:T	53.3	0.218
19	ZNF703 (A426T)	chr8:37555695:G:A	41.9	0.367
19	ZNF711 (S703C)	chrX:84526518:C:G	52.7	0.359
20	AARS2 (T222S)	chr6:44278815:G:C	36.3	0.072
20	ANKRD7 (G201R)	chr7:117876167:G:A	42.9	0.269
20	ARGLU1 (E145G)	chr13:107211919:T:C	55.4	0.054
20	ASPM (Y403S)	chr1:197112174:T:G	46.3	0.266
20	BZRAP1 (S555P)	chr17:56396487:A:G	47.6	0.37
20	C14orf105 (S6C)	chr14:57960417:G:C	44.5	0.153
20	C18orf25 (S216C)	chr18:43796492:A:T	48	0.297
20	CACNA1H (E67G)	chr16:1203937:A:G	43.7	0.324
20	CNTROB (E332G)	chr17:7842898:A:G	48.7	0.107
20	CSMD3 (G243R)	chr8:114111175:C:T	49	0.347
20	CTU2 (D337N)	chr16:88779778:G:A	49.1	0.32
20	DCST2 (V8I)	chr1:155006156:C:T	53	0.323
20	DNAH5 (I3938F)	chr5:13729619:T:A	47.1	0.258
20	DNMBP (G67R)	chr10:101728941:C:T	50.8	0.293
20	ELFN2 (S588F)	chr22:37769812:G:A	48.5	0.351
20	EP300 (D1330N)	chr22:41564566:G:A	38.3	0.073
20	EYA1 (Y235*)	chr8:72211403:A:C	50.1	0.173
20	FAT4 (D888V)	chr4:126240229:A:T	52.6	0.247
20	FBLN1 (P675L)	chr22:45959004:C:T	49.8	0.336
20	FSBP (L29P)	chr8:95449011:A:G	48	0.32
20	GOLGA5 (D358G)	chr14:93276679:A:G	50	0.35
20	GPC1 (M444I)	chr2:241404574:G:C	50.4	0.257
20	GRIK5 (R682W)	chr19:42510094:G:A	46.9	0.263
20	HIST1H3J (L127V)	chr6:27858192:G:C	45.2	0.27
20	HSD3B7 (Y265H)	chr16:30999187:T:C	52.2	0.24
20	KRT36 (V358A)	chr17:39643337:A:G	49.4	0.244
20	LRSAM1 (R383C)	chr9:130245287:C:T	51.7	0.169
20	MAST4 (A1642V)	chr5:66459923:C:T	49.1	0.376
20	MPHOSPH10 (D73G)	chr2:71360156:A:G	51.8	0.279
20	NAT10 (M827V)	chr11:34162006:A:G	45	0.547
20	NAV1 (P1845L)	chr1:201786409:C:T	50	0.352
20	NCAM2 (D351N)	chr21:22746189:G:A	50.1	0.317
20	NEK1 (M208V)	chr4:170506685:T:C	45.8	0.266
20	NKX2-6 (R206C)	chr8:23560254:G:A	49.7	0.391
20	PCDHA2 (V226A)	chr5:140175226:T:C	50	0.338
20	PRIMA1 (P59T)	chr14:94245576:G:T	47.1	0.469
20	PTPRS (M795T)	chr19:5225851:A:G	47.3	0.339
20	RBM27 (M313V)	chr5:145613099:A:G	52	0.238
20	RFC5 (I105T)	chr12:118458757:T:C	27.1	0.075
20	RTEL1 (D1090G)	chr20:62326253:A:G	53.4	0.149
20	SASH1 (P443L)	chr6:148848632:C:T	48.1	0.155
20	SIDT2 (L705P)	chr11:117063359:T:C	18.9	0.067
20	SP1 (V167L)	chr12:53776230:G:C	37.5	0.101
20	SPEF2 (V1413I)	chr5:35779238:G:A	46.8	0.367
20	SRSF6 (R313H)	chr20:42089606:G:A	52.2	0.337
20	TADA1 (G20E)	chr1:166845412:C:T	49.7	0.286
20	TASP1 (C293R)	chr20:13463982:A:G	46.7	0.237
20	TDRD7 (S255P)	chr9:100204065:T:C	44.6	0.556
20	TLR10 (E181G)	chr4:38776670:T:C	48	0.402
20	TM9SF1 (E266G)	chr14:24664056:T:C	53.5	0.505
20	TRIM7 (E26A)	chr5:180632034:T:G	47.4	0.314
20	TRIML1 (E91G)	chr4:189060984:A:G	48.2	0.268
20	TTLL7 (S612L)	chr1:84373296:G:A	49.8	0.333
20	TTLL7 (I608M)	chr1:84373307:G:C	49.9	0.337
20	TUBB (T232I)	chr6:30691534:C:T	45.9	0.267
20	ZFHX4 (P2047S)	chr8:77765296:C:T	47.8	0.311
20	ZFYVE9 (R717K)	chr1:52705239:G:A	50.1	0.488
20	TP53 (R248W)	chr17:7577539:G:A	48.4	0.533
21	ATP8B3 (F433Y)	chr19:1800303:A:T	52.5	0.313
21	BHLHE22 (G112S)	chr8:65493681:G:A	36.1	0.224
21	CCDC15 (Q477R)	chr11:124857552:A:G	52.3	0.319
21	HUWE1 (D1193N)	chrX:53620488:C:T	45.6	0.759
21	LRRC39 (V273D)	chr1:100618075:A:T	49.9	0.484
21	LTBP2 (R1752W)	chr14:74968210:G:A	51.1	0.441
21	MXRA5 (R1487Q)	chrX:3239266:C:T	44.6	0.514
21	OTOS (G28R)	chr2:241079482:C:T	48	0.387
21	PLXNA2 (A585V)	chr1:208270206:G:A	46.4	0.274
21	RASGRP1 (R145Q)	chr15:38818545:C:T	50.8	0.267
21	SCN11A (L1762F)	chr3:38888275:C:A	48.7	0.257
21	SPO11 (K391N)	chr20:55918498:A:T	43.8	0.333
21	SRRT (D14G)	chr7:100473252:A:G	52.8	0.435
22	CRAMP1L (M347I)	chr16:1705223:G:A	49.9	0.183
22	IRX2 (W132L)	chr5:2749756:C:A	46.4	0.265
23	MKI67 (K2634fs)	chr10:129902203:TT:T	22.2	0.07
23	SRRT (G104fs)	chr7:100479331:TG:T	34.7	0.074
24	MARCH3 (E123*)	chr5:126250648:C:A	35.3	0.293
24	SEPT2 (A194P)	chr2:242277161:G:C	37.3	0.329
24	ABCA10 (P670L)	chr17:67187319:G:A	43.7	0.371
24	ABCB1 (G674R)	chr7:87174183:C:T	52.4	0.299
24	ABCC5 (L1051V)	chr3:183667617:G:C	49.1	0.472
24	ACOX1 (R393Q)	chr17:73946975:C:T	40.4	0.172
24	ACSM2B (D52N)	chr16:20576014:C:T	43	0.356
24	ADAM11 (E359K)	chr17:42851745:G:A	46.1	0.5
24	AGAP2 (S499F)	chr12:58127862:G:A	47.9	0.422
24	AKAP3 (Q536*)	chr12:4736462:G:A	38.7	0.274
24	ANGPTL2 (P61L)	chr9:129870829:G:A	39.3	0.418
24	APLP2 (D272N)	chr11:129992300:G:A	50.2	0.172
24	ARHGEF15 (P102L)	chr17:8215662:C:T	33.7	0.36
24	ASB10 (R184Q)	chr7:150883647:C:T	43.5	0.333
24	C11orf35 (L624Q)	chr11:555014:A:T	22.7	0.208
24	C19orf71 (W63*)	chr19:3543338:G:A	43.5	0.545
24	C1QL2 (D80N)	chr2:119915608:C:T	45.9	0.44
24	C2CD5 (G607D)	chr12:22631368:C:T	43.3	0.306
24	CACNA1H (T2044A)	chr16:1270062:A:G	35.8	0.411
24	CCDC68 (P306S)	chr18:52575051:G:A	51.1	0.37
24	CDH12 (G248E)	chr5:21842341:C:T	48.2	0.473
24	COL12A1 (G748E)	chr6:75887573:C:T	45.9	0.226
24	COPS3 (L24P)	chr17:17179463:A:G	42	0.43
24	CSMD2 (E2862K)	chr1:34023493:C:T	49.8	0.35
24	CSRP2 (R84S)	chr12:77256987:G:T	47.6	0.465
24	CTTNBP2 (S436F)	chr7:117431943:G:A	41.3	0.315
24	DAPK3 (P216S)	chr19:3961143:G:A	47.4	0.353
24	DDN (E647K)	chr12:49390720:C:T	50.1	0.321
24	DDX41 (T621I)	chr5:176938853:G:A	50.6	0.276
24	DICER1 (S1747L)	chr14:95560349:G:A	28.6	0.359
24	DNAH5 (R3096*)	chr5:13776635:G:A	34.3	0.437
24	DNAH6 (E2979K)	chr2:84934727:G:A	46.2	0.338
24	DNAH7 (N3782S)	chr2:196636472:T:C	33.5	0.318
24	DNTTIP2 (A650V)	chr1:94337746:G:A	30.8	0.331
24	DOK7 (Q233*)	chr4:3491448:C:T	48	0.425
24	DOLPP1 (R206*)	chr9:131849013:C:T	48.7	0.246
24	DTX1 (A455V)	chr12:113532730:C:T	38	0.338
24	ECT2L (P170L)	chr6:139164282:C:T	48.8	0.226
24	EFNB3 (P74L)	chr17:7611374:C:T	44.6	0.305
24	EPHA6 (E578K)	chr3:97167412:G:A	45.2	0.585
24	EYS (A2712T)	chr6:64451806:C:T	25.5	0.328
24	FADS6 (I197F)	chr17:72877335:T:A	48.4	0.231
24	FLG (D736N)	chr1:152285156:C:T	42.1	0.358
24	FLG2 (S1793F)	chr1:152324884:G:A	44.1	0.366
24	FLG2 (S840L)	chr1:152327743:G:A	32.8	0.334
24	FOCAD (G800R)	chr9:20881950:G:A	33.4	0.379
24	GCM1 (P345L)	chr6:52993281:G:A	33.5	0.316
24	GIMAP5 (S22T)	chr7:150439291:T:A	47.1	0.328
24	GLP2R (M215I)	chr17:9760773:G:A	39.7	0.363
24	GON4L (R146K)	chr1:155823135:C:T	36.9	0.347
24	GPRIN2 (P10S)	chr10:46998908:C:T	46.1	0.175
24	GUCA1A (V145G)	chr6:42146622:T:G	32.9	0.338
24	GUCY2C (R356K)	chr12:14827576:C:T	51.6	0.282
24	IER5 (P185L)	chr1:181058592:C:T	37.3	0.385
24	IGFN1 (D2073N)	chr1:201180238:G:A	39.1	0.277
24	IL11RA (R179H)	chr9:34657474:G:A	34	0.383
24	KCNJ2 (S342F)	chr17:68172205:C:T	42.2	0.256
24	KCNK7 (L97F)	chr11:65362955:G:A	44.6	0.724
24	KLHDC1 (L261H)	chr14:50199493:T:A	48.8	0.388
24	KRI1 (R598Q)	chr19:10665769:C:T	46.7	0.341
24	LHPP (H103Y)	chr10:126172889:C:T	46.5	0.38
24	LOXHD1 (E1006K)	chr18:44140091:C:T	29.1	0.417
24	LRP3 (P277S)	chr19:33696505:C:T	49.5	0.402
24	LRRC7 (G1302E)	chr1:70509686:G:A	50	0.372
24	LST3 (P275L)	chr12:21028265:C:T	35.3	0.167
24	MARCO (G178R)	chr2:119731980:G:A	48.5	0.315
24	MARCO (G178E)	chr2:119731981:G:A	48.6	0.31
24	MAST4 (H1931R)	chr5:66460790:A:G	31.8	0.305
24	MED13 (V323A)	chr17:60108846:A:G	47.1	0.34
24	MYCBPAP (P232L)	chr17:48595999:C:T	39.3	0.281
24	MYO15A (D640N)	chr17:18024032:G:A	42.7	0.385
24	NAIP (A218T)	chr5:70307118:C:T	42.8	0.197
24	NBPF6 (R620C)	chr1:109010183:C:T	46	0.217
24	NDST4 (S682F)	chr4:115767049:G:A	32.7	0.381
24	NEB (E8027K)	chr2:152355847:C:T	32.8	0.327
24	NEDD1 (R120*)	chr12:97311504:C:T	51.1	0.348
24	NEFM (P686L)	chr8:24775425:C:T	37.8	0.237
24	NLRP11 (G527E)	chr19:56320396:C:T	26.9	0.364
24	NOTCH3 (E618K)	chr19:15297788:C:T	34.9	0.324
24	NPNT (Y257*)	chr4:106861356:T:G	25.7	0.407
24	NPPA (D103N)	chr1:11907313:C:T	29.2	0.435
24	OAT (V339A)	chr10:126089552:A:G	41.7	0.308
24	PCDHB1 (S24F)	chr5:140431126:C:T	40.7	0.403
24	PDGFRB (D802N)	chr5:149500826:C:T	31.8	0.252
24	PDZD2 (S2331*)	chr5:32090546:C:A	45	0.351
24	PILRA (P238S)	chr7:99996918:C:T	47.1	0.371
24	PIP5K1A (R464Q)	chr1:151214626:G:A	31.1	0.284
24	PLEK2 (H19Y)	chr14:67864531:G:A	42.9	0.319
24	PLXDC2 (K313E)	chr10:20465981:A:G	49.2	0.389
24	PMEPA1 (P172L)	chr20:56227458:G:A	43.3	0.331
24	POM121L2 (P88S)	chr6:27279688:G:A	43.1	0.241
24	PREX2 (A355T)	chr8:68965451:G:A	34.7	0.1
24	PRUNE2 (P1809Q)	chr9:79321764:G:T	47.4	0.324
24	PSG8 (P8S)	chr19:43269712:G:A	49.4	0.356
24	PTPRQ (F1814S)	chr12:81013996:T:C	44.1	0.366
24	RNF17 (S1590F)	chr13:25451320:C:T	35.3	0.309
24	RNF40 (D71N)	chr16:30774517:G:A	38.8	0.282
24	RYR2 (R911K)	chr1:237675007:G:A	48.5	0.31
24	SASH1 (A874T)	chr6:148865226:G:A	37.3	0.326
24	SCAND3 (G283E)	chr6:28543634:C:T	47.2	0.308
24	SCN3A (G801R)	chr2:165987918:C:T	47.7	0.366
24	SGCZ (V39M)	chr8:14412360:C:T	36.5	0.585
24	SIM1 (H394Y)	chr6:100841753:G:A	38.9	0.419
24	SLC17A9 (V159L)	chr20:61591933:G:T	47.4	0.292
24	SLC1A6 (H154Y)	chr19:15079203:G:A	38.9	0.391
24	SLC5A5 (T607P)	chr19:18004573:A:C	47.9	0.345
24	SLITRK1 (D568N)	chr13:84453941:C:T	40.6	0.345
24	SMARCA4 (P1536L)	chr19:11169017:C:T	29.7	0.328
24	SMEK1 (S747F)	chr14:91927876:G:A	49	0.303
24	SORCS3 (M623I)	chr10:106927075:G:A	51.5	0.38
24	SPAG8 (A290T)	chr9:35811051:C:T	47.9	0.325
24	SPEM1 (P166S)	chr17:7324490:C:T	49.1	0.304
24	SSTR3 (M370I)	chr22:37602733:C:T	46.4	0.411
24	SUSD4 (D458Y)	chr1:223396663:C:A	38.8	0.243
24	SYT4 (S144F)	chr18:40853963:G:A	48.2	0.382
24	TEAD4 (P199S)	chr12:3129811:C:T	35.3	0.32
24	TEP1 (A2219V)	chr14:20841691:G:A	42.3	0.39
24	TRPM6 (P1707L)	chr9:77359037:G:A	48.8	0.359
24	TUBB3 (R424C)	chr16:89999938:C:T	42	0.357
24	WDR65 (T598A)	chr1:43675450:A:G	38	0.238
24	XKR4 (V503I)	chr8:56436340:G:A	32.5	0.081
24	ZNF221 (A337V)	chr19:44470664:C:T	47.3	0.318
24	ZNF260 (P359L)	chr19:37005065:G:A	34.5	0.333
24	ZNF469 (A758T)	chr16:88496150:G:A	38.2	0.375
24	ZNF536 (R209Q)	chr19:30935095:G:A	48.3	0.274
24	ZNF585B (V159G)	chr19:37677963:A:C	44.4	0.357
24	ZNF804A (R814Q)	chr2:185802564:G:A	18.8	0.351
26	ADAMTS5 (R180C)	chr21:28338173:G:A	44.5	0.256
26	ADAMTS9 (V1517I)	chr3:64547403:C:T	52.1	0.381
26	ADCK1 (S187L)	chr14:78353570:C:T	49.1	0.647
26	AKR1D1 (V259G)	chr7:137792247:T:G	49.2	0.157
26	C16orf11 (R459K)	chr16:614967:G:A	44	0.48
26	CLEC16A (D608G)	chr16:11141156:A:G	36.5	0.245
26	CLTCL1 (V777M)	chr22:19210296:C:T	51.7	0.171
26	CNOT1 (P1326S)	chr16:58580255:G:A	53.3	0.16
26	CXorf22 (F369V)	chrX:35971767:T:G	46.5	0.314
26	DNASE1L2 (L146P)	chr16:2287496:T:C	15.3	0.07
26	EGFR (R334C)	chr7:55223633:C:T	49.1	0.407
26	FITM1 (T99A)	chr14:24601448:A:G	51.1	0.148
26	GNAZ (E146K)	chr22:23438318:G:A	50.8	0.259
26	HIVEP2 (E53K)	chr6:143095719:C:T	52.8	0.257
26	HIVEP2 (G44V)	chr6:143095745:C:A	52.9	0.191
26	HIVEP2 (W26C)	chr6:143095798:C:A	52.1	0.124
26	HIVEP2 (R25T)	chr6:143095802:C:G	51.8	0.108
26	HIVEP2 (D20N)	chr6:143095818:C:T	51.3	0.139
26	HIVEP2 (D2N)	chr6:143095872:C:T	47.7	0.213
26	IL1RAPL2 (G258S)	chrX:104728379:G:A	33.3	0.359
26	KIFC2 (Q181*)	chr8:145692939:C:T	53.6	0.084
26	L1TD1 (Q544*)	chr1:62676076:C:T	46.1	0.246
26	LAMB1 (C553Y)	chr7:107605109:C:T	48.3	0.278
26	LILRA4 (S225T)	chr19:54848950:A:T	45	0.267
26	LST3 (S138R)	chr12:21014003:A:C	48.8	0.416
26	MYOCD (N657I)	chr17:12656575:A:T	54.6	0.362
26	NDRG1 (R361C)	chr8:134251225:G:A	46.4	0.381
26	NLGN4X (L793I)	chrX:5810992:G:T	51.3	0.7
26	NLRP8 (F1036L)	chr19:56499238:T:C	53	0.339
26	NUP37 (C172G)	chr12:102479570:A:C	47	0.38
26	PEG3 (F1564V)	chr19:57325120:A:C	50.9	0.128
26	PHIP (L1370I)	chr6:79657438:A:T	50.8	0.28
26	PLA2G4F (P714H)	chr15:42436183:G:T	49.7	0.34
26	PPP2R1A (F578V)	chr19:52729040:T:G	52.3	0.36
26	PRKCB (V522M)	chr16:24196462:G:A	50.4	0.234
26	RALGAPA1 (N37S)	chr14:36244948:T:C	46.9	0.368
26	RP1 (Q1092H)	chr8:55539718:A:C	50.2	0.15
26	SATB1 (R674*)	chr3:18391030:G:A	49.2	0.388
26	SDK1 (S2155A)	chr7:4304837:T:G	31.3	0.108
26	SLC38A2 (L261S)	chr12:46758263:A:G	53.1	0.333
26	SMTNL2 (F460L)	chr17:4510776:C:G	54.1	0.097
26	ST8SIA5 (H371Q)	chr18:44260131:G:C	51.4	0.07
26	STAB2 (Y718H)	chr12:104062487:T:C	46.4	0.273
26	STK32C (A416V)	chr10:134036188:G:A	50.4	0.628
26	TP63 (E591A)	chr3:189612020:A:C	55.3	0.161
26	TRIM61 (V4G)	chr4:165891144:A:C	52	0.073
26	WDFY4 (L383R)	chr10:49939173:T:G	52.5	0.486
26	ZNF124 (L29S)	chr1:247323060:A:G	52.4	0.22
26	ZNF321P (E114A)	chr19:53432517:T:G	50.6	0.339
26	ZNF431 (T199S)	chr19:21365702:C:G	48.7	0.313
26	ZNF737 (K192T)	chr19:20728434:T:G	49.6	0.31
27	BRD1 (E533V)	chr22:50192694:T:A	46.3	0.193
27	CCT7 (S169F)	chr2:73471731:C:T	38.3	0.136
27	ETS1 (W400*)	chr11:128333447:C:T	48.9	0.24
27	EYA1 (G159R)	chr8:72229868:C:T	37.8	0.189
27	FAM110A (R152H)	chr20:825902:G:A	33.8	0.159
27	FSCN3 (S462N)	chr7:127240341:G:A	47.9	0.136
27	GIMAP8 (R270M)	chr7:150171226:G:T	34.3	0.085
27	INTS9 (L655*)	chr8:28625676:A:T	47.8	0.164
27	KL (V634E)	chr13:33635117:T:A	49.1	0.238
27	MAP3K8 (E366Q)	chr10:30748253:G:C	45.7	0.34
27	MEGF6 (Q903*)	chr1:3417197:G:A	40	0.157
27	NLRP4 (L196F)	chr19:56369347:G:T	50.3	0.238
27	PLCB1 (P611L)	chr20:8709765:C:T	47.9	0.066
27	SLC6A16 (V670L)	chr19:49793583:C:G	39.7	0.146
27	SUN3 (G193*)	chr7:48045566:C:A	34.7	0.123
28	ABCG8 (P239A)	chr2:44079758:C:G	52	0.305
28	ACCSL (Q122H)	chr11:44069952:A:T	53.5	0.308
28	ADAMTS18 (G1140V)	chr16:77323292:C:A	48.4	0.346
28	ADAMTS3 (T1096A)	chr4:73149185:T:C	51.4	0.3
28	ANKRD31 (I1842L)	chr5:74380148:T:A	54.1	0.249
28	ANKRD35 (S760A)	chr1:145562590:T:G	26.9	0.105
28	ASH1L (T2900fs)	chr1:155307999:G:GT	23.4	0.103
28	ASPM (W989L)	chr1:197094292:C:A	54.8	0.216
28	ATP6V1B1 (Y498F)	chr2:71192202:A:T	49.3	0.346
28	C20orf26 (S243N)	chr20:20079327:G:A	54.8	0.068
28	CD163 (R637C)	chr12:7640096:G:A	46	0.257
28	CLEC19A (W86L)	chr16:19315386:G:T	50.7	0.297
28	CTAGE4 (L693R)	chr7:143882674:T:G	38.5	0.069
28	CXXC4 (R65P)	chr4:105412766:C:G	52	0.301
28	DNAH9 (Y3675*)	chr17:11790195:C:G	50.3	0.256
28	EGLN1 (F391S)	chr1:231503359:A:G	48.7	0.238
28	EPS8L1 (P418H)	chr19:55594784:C:A	51.2	0.274
28	EXTL1 (L616P)	chr1:26361494:T:C	39.1	0.101
28	FAM124B (D237Y)	chr2:225265777:C:A	49.3	0.229
28	FASTKD5 (F405I)	chr20:3128504:A:T	52.3	0.543
28	FBXL18 (A531T)	chr7:5540309:C:T	42.2	0.137
28	HERC5 (Y731H)	chr4:89414220:T:C	53.4	0.114
28	IFIH1 (N608S)	chr2:163134146:T:C	52	0.205
28	INPP4A (I404V)	chr2:99169280:A:G	53.7	0.234
28	ITGAE (E195K)	chr17:3664322:C:T	44	0.2
28	KCTD1 (T497P)	chr18:24127012:T:G	24	0.154
28	LGI2 (Q365*)	chr4:25005618:G:A	49.6	0.2
28	MMP20 (Y367*)	chr11:102464316:G:C	48.7	0.28
28	MRVI1 (Q27K)	chr11:10673718:G:T	53.9	0.239
28	NBPF20 (C218F)	chr1:148341920:C:A	22.6	0.208
28	NCOR1 (D1835N)	chr17:15965093:C:T	49.8	0.364
28	NKX3-2 (P74T)	chr4:13545819:G:T	45.7	0.309
28	NRXN1 (F345C)	chr2:50850651:A:C	52	0.254
28	NTN3 (D360E)	chr16:2522853:C:A	52.3	0.268
28	P2RY1 (G48D)	chr3:152553714:G:A	50.8	0.341
28	PAM (S279R)	chr5:102286454:A:C	53.7	0.289
28	PARP10 (F727V)	chr8:145057614:A:C	51.9	0.258
28	PAX7 (P306L)	chr1:19027277:C:T	52.3	0.259
28	PHF20L1 (E934A)	chr8:133856453:A:C	53.9	0.245
28	PLCL1 (E453K)	chr2:198949598:G:A	45.5	0.098
28	PLXND1 (Y1673H)	chr3:129279543:A:G	49.6	0.129
28	PRKD1 (Q800K)	chr14:30066757:G:T	52.1	0.38
28	PTCD3 (M493V)	chr2:86360493:A:G	55.6	0.257
28	PTPRD (R229Q)	chr9:8523518:C:T	39.6	0.077
28	RAB3GAP2 (L865F)	chr1:220344445:C:A	50.7	0.248
28	RPS6KC1 (E867V)	chr1:213415419:A:T	51.9	0.236
28	SALL1 (A742D)	chr16:51173908:G:T	51.7	0.338
28	SETD2 (Q2284P)	chr3:47098423:T:G	52.3	0.275
28	SIGLEC12 (P551Q)	chr19:51995031:G:T	49.8	0.217
28	SLC4A9 (S298L)	chr5:139742510:C:T	47.4	0.332
28	SMG7 (G665W)	chr1:183514208:G:T	54.4	0.291
28	STAC (S80I)	chr3:36484983:G:T	52.7	0.281
28	TFAP2A (L267V)	chr6:10402815:A:C	49.5	0.109
28	TTC22 (V398M)	chr1:55247434:C:T	44.2	0.241
28	YWHAB (Y120*)	chr20:43532693:C:A	40.1	0.557
28	ZNF780B (L232P)	chr19:40542071:A:G	50.1	0.194
28	ZNF831 (D1025fs)	chr20:57769139:T:TG	42.3	0.225
30	ALPK3 (N486S)	chr15:85383361:A:G	44	0.136
30	C21orf67 (S154L)	chr21:46354890:G:A	50	0.108
30	CD55 (P332T)	chr1:207510688:C:A	46.6	0.357
30	COBLL1 (I549M)	chr2:165557160:A:C	35.3	0.138
30	CSNK1G1 (E193D)	chr15:64506189:T:G	51.6	0.123
30	DNAH1 (N2362S)	chr3:52409355:A:G	44.2	0.33
30	DYNLL1 (A25T)	chr12:120934297:G:A	50.5	0.471
30	GOLGA4 (M938T)	chr3:37366124:T:C	48.5	0.337
30	IMMP2L (P50S)	chr7:111127385:G:A	52.3	0.125
30	KDM5B (L1161Q)	chr1:202704606:A:T	51.7	0.138
30	KIF1B (Y1754D)	chr1:10435075:T:G	46.8	0.347
30	LRP2 (G1281E)	chr2:170097701:C:T	21.9	0.077
30	MAP1A (E1854K)	chr15:43818517:G:A	50.3	0.169
30	MCM10 (E264K)	chr10:13222464:G:A	49.3	0.125
30	MOSPD2 (V112M)	chrX:14915217:G:A	49.8	0.309
30	PHLDB2 (I765V)	chr3:111659388:A:G	49.1	0.273
30	PLEKHA8 (A522V)	chr7:30118330:C:T	50.1	0.104
30	RBP4 (A148S)	chr10:95353706:C:A	46.8	0.338
30	SHROOM2 (P375L)	chrX:9863072:C:T	48	0.107
30	SI (C1542F)	chr3:164714390:C:A	46.7	0.105
30	SRPK3 (K178M)	chrX:153047230:A:T	51.7	0.2
30	SUMF2 (S300R)	chr7:56147387:C:A	54.5	0.307
30	WDFY4 (I403L)	chr10:49939232:A:T	50.8	0.119
30	ZBTB33 (E100G)	chrX:119387569:A:G	51	0.1
30	ZNF627 (S104I)	chr19:11727629:G:T	50.1	0.311
30	ZNF75D (F458L)	chrX:134421230:A:G	47.2	0.308
31	SEPT10 (A390T)	chr2:110303808:C:T	50.9	0.202
31	ABRACL (V28M)	chr6:139363876:G:A	45.6	0.07
31	ADCY8 (Q706P)	chr8:131880185:T:G	42.7	0.4
31	AKAP17A (H125Y)	chrX:1712728:C:T	47.4	0.541
31	ANO1 (G139S)	chr11:69934164:G:A	49.6	0.171
31	ATP11C (L1071M)	chrX:138820161:A:T	35.8	0.067
31	ATP11C (L1071M)	chrX:138820161:A:T	35.8	0.067
31	ATP2B2 (V437M)	chr3:10417221:C:T	49	0.211
31	BLACE (A50V)	chr7:155150726:G:A	42.8	0.165
31	CABLES1 (R280G)	chr18:20716564:A:G	47.6	0.164
31	CCDC85C (S267L)	chr14:100002419:G:A	45.3	0.103
31	CHD5 (S88R)	chr1:6219519:A:T	49.7	0.106
31	CHD5 (S88R)	chr1:6219519:A:T	49.7	0.106
31	CLCN3 (L28P)	chr4:170557162:T:C	45.5	0.054
31	CLCN3 (L28P)	chr4:170557162:T:C	45.5	0.054
31	CLSTN1 (N270K)	chr1:9809694:G:T	49.2	0.629
31	CPD (E981D)	chr17:28776640:G:C	51.7	0.286
31	CPD (E981D)	chr17:28776640:G:C	51.7	0.286
31	CYP24A1 (E143K)	chr20:52789470:C:T	49.2	0.231
31	EGLN2 (R354W)	chr19:41313139:C:T	46.1	0.229
31	EPC1 (S717L)	chr10:32560770:G:A	51.3	0.122
31	EPC1 (S713L)	chr10:32560782:G:A	51.6	0.113
31	EPC1 (P689S)	chr10:32560963:G:A	50.5	0.2
31	EPC1 (F672L)	chr10:32561012:G:C	50.6	0.203
31	EPC1 (S648C)	chr10:32561085:G:C	40.4	0.225
31	ESPL1 (L1748I)	chr12:53684131:C:A	52.3	0.283
31	HOXB3 (E402G)	chr17:46627787:T:C	50.6	0.256
31	ITGAD (A645V)	chr16:31424505:C:T	49.5	0.366
31	KEAP1 (C368Y)	chr19:10602475:C:T	47.7	0.32
31	KEAP1 (C368Y)	chr19:10602475:C:T	47.7	0.32
31	KLHL9 (D572fs)	chr9:21333145:C:CT	255	0.316
31	KLHL9 (E570Q)	chr9:21333151:C:G	51.5	0.391
31	KRT18 (T294S)	chr12:53345572:A:T	47.1	0.263
31	MREG (L3fs)	chr2:216878043:AG:A	255	0.343
31	PLP2 (G126D)	chrX:49030713:G:A	52.1	0.383
31	PLP2 (G126D)	chrX:49030713:G:A	52.1	0.383
31	PLXNC1 (K1123T)	chr12:94654534:A:C	47.9	0.293
31	REPS1 (N122K)	chr6:139266746:A:T	50.8	0.487
31	RNF126 (I158M)	chr19:650266:G:C	47.9	0.462
31	RNF126 (I158M)	chr19:650266:G:C	47.9	0.462
31	RREB1 (I538M)	chr6:7229946:C:G	43.6	0.304
31	RREB1 (Q1271E)	chr6:7240673:C:G	43.4	0.348
31	RREB1 (I538M)	chr6:7229946:C:G	43.6	0.304
31	RREB1 (Q1271E)	chr6:7240673:C:G	43.4	0.348
31	RXFP3 (V132L)	chr5:33937239:G:T	50.1	0.285
31	SMAD7 (N381S)	chr18:46447881:T:C	47.9	0.073
31	SMAD7 (N381S)	chr18:46447881:T:C	47.9	0.073
31	SPG20 (D359E)	chr13:36903586:G:T	50.3	0.182
31	SVEP1 (P204H)	chr9:113312305:G:T	50.5	0.147
31	TRAF7 (G270W)	chr16:2223196:G:T	47.6	0.391
31	UNC5CL (V144L)	chr6:41001876:C:A	47.1	0.358
31	UNC5CL (V144L)	chr6:41001876:C:A	47.1	0.358
31	ZCCHC12 (R172W)	chrX:117959721:C:T	49.9	0.446
31	ZCCHC12 (R172W)	chrX:117959721:C:T	49.9	0.446
31	ZCCHC5 (H330fs)	chrX:77912929:TG:T	255	0.333
31	ZCCHC5 (H330fs)	chrX:77912929:TG:T	255	0.333
31	ZNF416 (E358D)	chr19:58084198:T:G	49.1	0.347
31	ZNF467 (S24I)	chr7:149467609:C:A	49.4	0.121
32	ABCA12 (Q931L)	chr2:215866353:T:A	52.2	0.107
32	ABCA8 (V1074I)	chr17:66883572:C:T	53.5	0.077
32	ABCB1 (N1034D)	chr7:87144729:T:C	34.3	0.064
32	ABCB11 (G14R)	chr2:169874596:C:T	51.6	0.303
32	ACAT2 (S134P)	chr6:160188159:T:C	49.4	0.181
32	ACSM5 (C110Y)	chr16:20429505:G:A	44	0.353
32	ADAM22 (L839Q)	chr7:87811279:T:A	51.6	0.065
32	AFP (F526I)	chr4:74318265:T:A	37.8	0.104
32	ALDH5A1 (G518S)	chr6:24533845:G:A	43.3	0.247
32	ALOX15B (P633T)	chr17:7951749:C:A	52.2	0.182
32	ANGPTL2 (H445D)	chr9:129851367:G:C	47.7	0.096
32	ANK3 (R2813K)	chr10:61832201:C:T	52.7	0.35
32	ANKFN1 (V920L)	chr17:54587938:G:C	54.8	0.11
32	ANKRD30A (G48S)	chr10:37418909:G:A	52.1	0.194
32	ANKS1A (E341G)	chr6:34952868:A:G	49.9	0.102
32	ANO3 (L560S)	chr11:26621104:T:C	53	0.121
32	ANTXR2 (V196I)	chr4:80975476:C:T	53.3	0.125
32	APOB (Q321E)	chr2:21256334:G:C	51.7	0.149
32	ARFGAP3 (V265A)	chr22:43218294:A:G	51.7	0.116
32	ARHGAP11A (I952T)	chr15:32929829:T:C	52	0.118
32	ARHGAP36 (P370Q)	chrX:130219891:C:A	41.5	0.235
32	ARPC3 (T39A)	chr12:110878185:T:C	45.9	0.167
32	ATP1A3 (M952T)	chr19:42472940:A:G	53.7	0.106
32	ATP8B4 (V790D)	chr15:50190369:A:T	48.6	0.114
32	AVPR1B (P311S)	chr1:206225371:C:T	47.8	0.136
32	BCAT2 (I361T)	chr19:49299719:A:G	49.6	0.101
32	BMP3 (R263Q)	chr4:81967363:G:A	46.5	0.095
32	C17orf97 (D358E)	chr17:263708:C:A	52.2	0.159
32	C18orf63 (A561G)	chr18:72021184:C:G	52.3	0.257
32	C20orf26 (I199K)	chr20:20071517:T:A	51.7	0.323
32	C2orf44 (W88R)	chr2:24262103:A:G	50.9	0.112
32	C4orf26 (I51T)	chr4:76489364:T:C	51.7	0.071
32	CACNB4 (E233D)	chr2:152727045:C:A	51.8	0.141
32	CALCOCO2 (P403S)	chr17:46937802:C:T	51.6	0.086
32	CATSPERB (V153D)	chr14:92174493:A:T	43.7	0.091
32	CAV3 (I120T)	chr3:8787456:T:C	50.3	0.123
32	CCDC171 (S908Y)	chr9:15777649:C:A	50.3	0.172
32	CCDC67 (Q63E)	chr11:93088694:C:G	53.2	0.08
32	CCDC82 (L240V)	chr11:96117194:G:C	45.8	0.123
32	CD40 (C41G)	chr20:44750528:T:G	51.6	0.151
32	CDH11 (H165Y)	chr16:65032495:G:A	48.5	0.394
32	CDT1 (G134E)	chr16:88871219:G:A	53.9	0.141
32	CELA1 (M59I)	chr12:51737560:C:T	39.2	0.385
32	CEP95 (D70G)	chr17:62506351:A:G	54.2	0.078
32	CES4A (M362I)	chr16:67038701:G:A	38.6	0.244
32	CFHR4 (D24N)	chr1:196871562:G:A	30.5	0.092
32	CHRM3 (P30H)	chr1:240070840:C:A	52.1	0.143
32	CHRM3 (Y293C)	chr1:240071629:A:G	50.2	0.072
32	CLEC16A (N196I)	chr16:11065076:A:T	52.9	0.103
32	CLMP (N115S)	chr11:122955264:T:C	51.8	0.108
32	COL12A1 (A888V)	chr6:75884801:G:A	53.4	0.163
32	COL19A1 (D1127G)	chr6:70916929:A:G	52.5	0.121
32	CORIN (G811E)	chr4:47625696:C:T	51.6	0.118
32	CPSF2 (E701K)	chr14:92625606:G:A	44.3	0.155
32	CR1 (P1911S)	chr1:207762040:C:T	52.2	0.085
32	CR2 (V458L)	chr1:207644231:G:T	51.7	0.088
32	CREB5 (L167P)	chr7:28758405:T:C	52.4	0.09
32	CRTC3 (R615*)	chr15:91185355:C:T	53.9	0.148
32	CRYBA4 (D124N)	chr22:27024321:G:A	51.6	0.164
32	CUL5 (I466T)	chr11:107960304:T:C	47.5	0.143
32	CUX1 (P429L)	chr7:101839944:C:T	44.3	0.085
32	DCAF5 (D532G)	chr14:69521808:T:C	54	0.075
32	DCAF6 (N947S)	chr1:168044657:A:G	53.4	0.075
32	DDX60 (S373F)	chr4:169209390:G:A	42.1	0.163
32	DMBT1 (S1196F)	chr10:124361556:C:T	40.3	0.714
32	DNAH12 (T1998S)	chr3:57394234:T:A	46.7	0.218
32	DNAH3 (L1895M)	chr16:21033386:G:T	53.2	0.121
32	DUS2 (L144F)	chr16:68100232:C:T	51.7	0.4
32	EDC4 (L982P)	chr16:67915689:T:C	52.8	0.213
32	ENTPD5 (S371P)	chr14:74436802:A:G	35	0.08
32	EP400 (T751A)	chr12:132471272:A:G	53.7	0.087
32	ERMN (Y271H)	chr2:158177866:A:G	52.5	0.095
32	EXTL1 (P605R)	chr1:26361461:C:G	50.5	0.185
32	FAM129C (S659N)	chr19:17664254:G:A	44.1	0.074
32	FAM3C (H199R)	chr7:120990603:T:C	51.7	0.075
32	FAT1 (Q2843*)	chr4:187539213:G:A	52	0.089
32	FCGBP (A4326T)	chr19:40368372:C:T	33.3	0.077
32	FCHO1 (S351P)	chr19:17886818:T:C	41.4	0.111
32	FKBP9 (F522L)	chr7:33042320:T:C	39.7	0.071
32	FRY (V802A)	chr13:32749753:T:C	45	0.069
32	G6PD (Y530C)	chrX:153760409:T:C	44	0.132
32	GCM2 (P432L)	chr6:10874454:G:A	50.2	0.125
32	GGN (G635fs)	chr19:38875105:AG:A	49.2	0.138
32	GPATCH1 (H411Q)	chr19:33597753:C:G	31.9	0.074
32	GPR98 (I3698N)	chr5:90046486:T:A	52.4	0.142
32	GPR98 (I5953F)	chr5:90261232:A:T	46.4	0.2
32	GRIN1 (V150A)	chr9:140040233:T:C	46.9	0.09
32	GRM3 (C730Y)	chr7:86469019:G:A	52.6	0.115
32	HARS2 (P379L)	chr5:140076930:C:T	52.4	0.101
32	HCN1 (T654M)	chr5:45262735:G:A	47.4	0.056
32	HEBP1 (T47A)	chr12:13142289:T:C	47.3	0.103
32	HECW2 (G719E)	chr2:197183458:C:T	51.6	0.256
32	HEXIM1 (G35R)	chr17:43226660:G:C	51.3	0.62
32	HMGXB4 (M486V)	chr22:35683433:A:G	44.8	0.121
32	HOXD9 (S202G)	chr2:176988100:A:G	53.5	0.252
32	HTR3E (G239E)	chr3:183823133:G:A	53.4	0.204
32	HYDIN (E4019*)	chr16:70894045:C:A	45.9	0.35
32	IFI16 (G730V)	chr1:159023426:G:T	54.3	0.052
32	IPCEF1 (S187F)	chr6:154521152:G:A	49.9	0.304
32	IQGAP3 (P233L)	chr1:156533026:G:A	43.6	0.159
32	IRS4 (G419V)	chrX:107978319:C:A	49.7	0.134
32	IRS4 (V239A)	chrX:107978859:A:G	44.1	0.167
32	ITGB4 (Y50C)	chr17:73723344:A:G	52.1	0.103
32	ITIH1 (N892D)	chr3:52825865:A:G	40.4	0.101
32	ITPKB (W509R)	chr1:226923635:A:G	51.9	0.104
32	IWS1 (P629L)	chr2:128250900:G:A	50.7	0.186
32	KBTBD2 (I9T)	chr7:32919191:A:G	52.9	0.101
32	KCMF1 (G15E)	chr2:85255039:G:A	52.4	0.09
32	KCNQ4 (I250T)	chr1:41285059:T:C	52.9	0.171
32	KIF13A (V985I)	chr6:17794925:C:T	55.1	0.058
32	KIF26B (E1434G)	chr1:245850586:A:G	51.4	0.1
32	KLHL11 (Y426C)	chr17:40010842:T:C	52.5	0.114
32	KLHL30 (V2M)	chr2:239049399:G:A	51.7	0.128
32	KMT2E (N1083T)	chr7:104748152:A:C	51.7	0.138
32	LIPM (D266G)	chr10:90575199:A:G	27.7	0.09
32	LMTK2 (Y350H)	chr7:97820089:T:C	52.9	0.068
32	LOXHD1 (M168T)	chr18:44219587:A:G	21.3	0.136
32	LOXL2 (R162K)	chr8:23217649:C:T	53.7	0.346
32	LRPPRC (S1336P)	chr2:44116995:A:G	43.7	0.146
32	LRRC16B (T865A)	chr14:24531942:A:G	33.4	0.066
32	LRRC8A (M37T)	chr9:131669553:T:C	52.5	0.169
32	LRRN1 (S245F)	chr3:3887059:C:T	44.5	0.118
32	LUZP1 (D324G)	chr1:23419784:T:C	47.6	0.102
32	MAP2K7 (I28T)	chr19:7968912:T:C	51.8	0.085
32	MAPKBP1 (Y363C)	chr15:42106837:A:G	42.1	0.151
32	MECOM (P88S)	chr3:169099088:G:A	54.1	0.61
32	MED23 (P971L)	chr6:131917188:G:A	51.1	0.361
32	MET (R1345C)	chr7:116435984:C:T	53.7	0.246
32	MFN2 (T139A)	chr1:12056316:A:G	51.5	0.104
32	MGEA5 (Y729H)	chr10:103551187:A:G	54	0.136
32	MKLN1 (S492F)	chr7:131130612:C:T	41.2	0.072
32	MKX (P49S)	chr10:28032200:G:A	50	0.195
32	MLLT6 (D13G)	chr17:36861923:A:G	50	0.136
32	MYCBP2 (E3607G)	chr13:77661674:T:C	48	0.087
32	MYO18B (D2208N)	chr22:26422559:G:A	54	0.075
32	MYO18B (A2249T)	chr22:26422682:G:A	52.3	0.31
32	MYO19 (I383V)	chr17:34866595:T:C	35.4	0.098
32	NAALAD2 (L106F)	chr11:89880619:C:T	48.8	0.104
32	NAMPTL (D165Y)	chr10:36812670:C:A	51.6	0.157
32	NBEAL2 (R597*)	chr3:47037014:C:T	48.8	0.124
32	NCCRP1 (E131G)	chr19:39688747:A:G	49.2	0.144
32	NCOA1 (G697V)	chr2:24930429:G:T	49.9	0.089
32	NEK10 (Q381*)	chr3:27343214:G:A	52.6	0.141
32	NEO1 (V498I)	chr15:73536725:G:A	52.7	0.128
32	NFKB2 (S188N)	chr10:104157344:G:A	52.6	0.13
32	NHSL1 (F251L)	chr6:138754743:A:G	42.2	0.07
32	NUMA1 (L12P)	chr11:71746955:A:G	25.4	0.058
32	OSGEP (Y146C)	chr14:20917400:T:C	42.3	0.113
32	PAPLN (H788L)	chr14:73729175:A:T	32	0.336
32	PAPPA (I478M)	chr9:118950451:C:G	50.1	0.159
32	PARP2 (D214G)	chr14:20822245:A:G	52.8	0.081
32	PAXIP1 (A917V)	chr7:154746036:G:A	51.7	0.084
32	PCDHA11 (V384A)	chr5:140249839:T:C	36.9	0.112
32	PCLO (E2139D)	chr7:82583852:T:G	52.5	0.192
32	PDK4 (M171V)	chr7:95222090:T:C	48.4	0.07
32	PGLS (T97A)	chr19:17626982:A:G	49.6	0.102
32	PHGR1 (G61D)	chr15:40648437:G:A	48.2	0.081
32	PIP (V52A)	chr7:142832346:T:C	50.2	0.061
32	PIP4K2C (D119G)	chr12:57988992:A:G	51.4	0.07
32	PKHD1L1 (R2605fs)	chr8:110476874:AG:A	47.4	0.13
32	PLAA (K650N)	chr9:26905947:T:A	52.1	0.087
32	PLCZ1 (E142K)	chr12:18872510:C:T	49.7	0.128
32	PLEKHD1 (E172K)	chr14:69969555:G:A	52.9	0.219
32	PNLIP (Y287H)	chr10:118315559:T:C	54.6	0.15
32	PPP1R14A (E86K)	chr19:38743560:C:T	42.4	0.092
32	PRKCZ (V95A)	chr1:1990980:T:C	49.9	0.225
32	PRUNE2 (T2323A)	chr9:79320223:T:C	51.6	0.154
32	PRUNE2 (P407L)	chr9:79325970:G:A	47.1	0.445
32	PRX (G1455R)	chr19:40899896:C:T	37.8	0.101
32	PTPRN2 (A999V)	chr7:157341689:G:A	52.3	0.186
32	PTPRT (C1165R)	chr20:40733313:A:G	27.6	0.059
32	PTPRT (E438V)	chr20:41101043:T:A	34.4	0.057
32	PUM1 (V1169L)	chr1:31409528:C:A	52.2	0.24
32	PUS10 (V213A)	chr2:61192597:A:G	40	0.09
32	PUS7 (V390A)	chr7:105121505:A:G	52	0.295
32	PVRL1 (G15V)	chr11:119599220:C:A	50.1	0.173
32	RAP1GAP (P481T)	chr1:21930393:G:T	51.8	0.093
32	RELN (R3020C)	chr7:103137108:G:A	46.5	0.106
32	RELN (G2549V)	chr7:103162491:C:A	43.1	0.274
32	RGL2 (P5L)	chr6:33266374:G:A	48	0.31
32	RHCE (Y242C)	chr1:25717316:T:C	51.5	0.131
32	RHOBTB2 (G357R)	chr8:22864761:G:A	51.6	0.128
32	RICTOR (P450S)	chr5:38964946:G:A	52.7	0.367
32	RIOK2 (Y73H)	chr5:96513541:A:G	52.4	0.1
32	RIT1 (M43T)	chr1:155880476:A:G	55.1	0.106
32	RNF135 (T282A)	chr17:29325754:A:G	49.3	0.088
32	RNPEPL1 (I377V)	chr2:241516345:A:G	50.5	0.119
32	RYR2 (S1427L)	chr1:237756786:C:T	25.8	0.06
32	SCN1B (T49A)	chr19:35523536:A:G	47.1	0.066
32	SCYL3 (D319N)	chr1:169833510:C:T	52.1	0.087
32	SEC16B (G998E)	chr1:177901644:C:T	51.6	0.143
32	SECISBP2L (M304T)	chr15:49320349:A:G	50.4	0.159
32	SEPHS2 (S463P)	chr16:30455662:A:G	51.8	0.134
32	SETD1A (F680S)	chr16:30977241:T:C	52.5	0.162
32	SH3GLB1 (R21C)	chr1:87170643:C:T	45.2	0.155
32	SH3PXD2B (D57G)	chr5:171833343:T:C	53.5	0.127
32	SIGLEC6 (R100K)	chr19:52034542:C:T	45.8	0.332
32	SIPA1L1 (W502*)	chr14:72085481:G:A	54.7	0.125
32	SKIL (L205S)	chr3:170078733:T:C	53.5	0.119
32	SLC17A3 (K282*)	chr6:25850836:T:A	51.1	0.114
32	SLC27A6 (K431T)	chr5:128362862:A:C	52.2	0.102
32	SLC4A10 (K406E)	chr2:162751210:A:G	51	0.126
32	SLC6A5 (G210R)	chr11:20625919:G:A	39.7	0.125
32	SLC7A14 (L141P)	chr3:170219017:A:G	51.6	0.151
32	SLITRK5 (L14F)	chr13:88327683:C:T	55.8	0.053
32	SLITRK5 (V278I)	chr13:88328475:G:A	43.1	0.064
32	SMARCA2 (R1270W)	chr9:2123764:C:T	52	0.145
32	SMARCAD1 (H895R)	chr4:95202693:A:G	48.2	0.121
32	SNAPC4 (S835P)	chr9:139274313:A:G	50	0.09
32	SNX8 (R127C)	chr7:2314786:G:A	53.1	0.29
32	SORBS1 (N581I)	chr10:97116550:T:A	32.2	0.152
32	SQSTM1 (S332*)	chr5:179260612:C:A	53	0.253
32	SRFBP1 (V214A)	chr5:121356071:T:C	52.7	0.107
32	STARD9 (V4547M)	chr15:43010254:G:A	49.1	0.106
32	SYCP2L (T583A)	chr6:10935354:A:G	44.2	0.089
32	SYTL1 (R324Q)	chr1:27676942:G:A	54.2	0.128
32	TAAR1 (T271A)	chr6:132966332:T:C	52.8	0.062
32	TACC3 (S745P)	chr4:1746254:T:C	50.2	0.157
32	TANC1 (V643A)	chr2:160035092:T:C	53.8	0.095
32	TANC2 (R1023*)	chr17:61476233:C:T	51	0.094
32	TAS2R16 (P188S)	chr7:122635127:G:A	52.6	0.318
32	TBC1D17 (D56G)	chr19:50381801:A:G	53	0.088
32	TBX3 (W197*)	chr12:115118750:C:T	35.6	0.182
32	TCEAL4 (W90G)	chrX:102840637:T:G	30.3	0.194
32	TCHH (E1179K)	chr1:152082158:C:T	53.7	0.09
32	TLR5 (N750S)	chr1:223284125:T:C	54	0.105
32	TMEM79 (T345A)	chr1:156261237:A:G	54.4	0.086
32	TPD52L1 (S58P)	chr6:125550300:T:C	53.6	0.21
32	TRA2B (S64P)	chr3:185643395:A:G	53.6	0.135
32	TRIM26 (E147G)	chr6:30166300:T:C	52	0.149
32	TSHZ3 (R198W)	chr19:31770107:G:A	51.8	0.222
32	UBE2Q1 (A177T)	chr1:154527912:C:T	39.3	0.132
32	UGGT1 (V320I)	chr2:128878015:G:A	53.2	0.071
32	ULK4 (R51H)	chr3:41979676:C:T	38.1	0.612
32	UMOD (R227S)	chr16:20360091:G:T	37	0.24
32	UNC13A (T740A)	chr19:17758164:T:C	49.1	0.106
32	UNK (A651V)	chr17:73816076:C:T	52.4	0.116
32	UPK1A (D211G)	chr19:36166905:A:G	52	0.095
32	VGLL3 (Ter327Gext*?)	chr3:86996176:A:C	55	0.559
32	VSTM2A (P264R)	chr7:54621716:C:G	53.4	0.127
32	XIRP2 (N3538I)	chr2:168110599:A:T	51.9	0.113
32	YIPF6 (M63T)	chrX:67733170:T:C	49.2	0.192
32	YTHDF3 (K433N)	chr8:64099871:A:T	53.3	0.12
32	ZC3H12C (N21fs)	chr11:110007419:G:GA	51.8	0.136
32	ZC3H13 (F1521L)	chr13:46538086:G:T	51.7	0.208
32	ZFYVE16 (R765Q)	chr5:79734798:G:A	52.6	0.201
32	ZFYVE26 (P827S)	chr14:68260399:G:A	51	0.163
32	ZMYND11 (T415A)	chr10:294291:A:G	50.2	0.133
32	ZNF12 (D80E)	chr7:6732333:A:T	50.3	0.382
32	ZNF142 (T1616A)	chr2:219503280:T:C	50.1	0.085
32	ZNF263 (Q234*)	chr16:3336080:C:T	50.5	0.191
32	ZNF280D (S379G)	chr15:56970889:T:C	50.1	0.21
32	ZNF311 (V64A)	chr6:28967383:A:G	52.1	0.108
32	ZNF461 (Y203C)	chr19:37130639:T:C	49.1	0.109
32	ZNF470 (N201I)	chr19:57088399:A:T	49.1	0.11
32	ZNF524 (P238L)	chr19:56114191:C:T	50	0.144
32	ZNF594 (H177Y)	chr17:5087023:G:A	52.2	0.236
32	ZYX (L296M)	chr7:143080278:T:A	51.1	0.102
33	ERBB3 (S1119C)	chr12:56494998:A:T	53.1	0.493
25b	A1CF (E34K)	chr10:52603882:C:T	40.7	0.28
[truncated: 393 more rows]

## Sheet: SuppTableS6
Supplementary Table 5
Selected somatic structural variants
Patient	Gene (HGNC)	chromosome	position	effect	SV Pair Coordinates	Quality	TumorAlleleRatio	NormalAlleleRatio	SvType	END
1	ARHGAP42	11	100707000	ARHGAP42 (Breakpoint)	-:11:70995000|+:11:100707000	93	0.15	0	PossibleLargeIndel	11:70995000
1	ARPC1B	7	99045000	ARPC1B (Breakpoint)	+:7:99045000|-:7:98988000	38	0.13	0	PossibleLargeIndel	7:98988000
1	ATP5J2-PTCD1	7	99045000	ATP5J2-PTCD1 (Breakpoint)	+:7:99045000|-:7:98988000	38	0.13	0	PossibleLargeIndel	7:98988000
1	C3orf67	3	59061000	C3orf67 (Breakpoint)	+:3:59061000|-:3:58969500	29	0.13	0	PossibleLargeIndel	3:58969500
1	CDS2	20	5112000	CDS2 (Breakpoint)	-:20:4900500|+:20:5112000	83	0.18	0	PossibleLargeIndel	20:4900500
1	CDS2_SLC23A2	20	5112000	CDS2_SLC23A2 (Breakpoint)	-:20:4900500|+:20:5112000	83	0.18	0	PossibleLargeIndel	20:4900500
1	CLPB	11	103792500	CLPB (Breakpoint)	-:11:72117000|+:11:103792500	130	0.15	0	PossibleLargeIndel	11:72117000
1	CLPB_PDGFD	11	103792500	CLPB_PDGFD (Breakpoint)	-:11:72117000|+:11:103792500	130	0.15	0	PossibleLargeIndel	11:72117000
1	CPSF4	7	99045000	CPSF4 (Breakpoint)	+:7:99045000|-:7:98988000	38	0.13	0	PossibleLargeIndel	7:98988000
1	IKZF3	17	37921500	IKZF3 (Breakpoint)	-:17:37359000|+:17:37921500	1331	0.24	0	PossibleLargeIndel	17:37359000
1	IKZF3_RPL19	17	37921500	IKZF3_RPL19 (Breakpoint)	-:17:37359000|+:17:37921500	1331	0.24	0	PossibleLargeIndel	17:37359000
1	JARID2	6	16168500	JARID2 (Breakpoint)	-:6:15361500|+:6:16168500	37	0.13	0	PossibleLargeIndel	6:15361500
1	NAALAD2	11	89866500	NAALAD2 (Breakpoint)	-:11:91048500|+:11:89866500	150	0.17	0	PossibleLargeIndel	11:91048500
1	PDE4D	5	58275000	PDE4D (Breakpoint)	-:5:59817000|+:5:58275000	29	0.2	0	PossibleLargeIndel	5:59817000
1	PDGFD	11	103792500	PDGFD (Breakpoint)	-:11:72117000|+:11:103792500	130	0.15	0	PossibleLargeIndel	11:72117000
1	PDGFD_CLPB	11	103792500	PDGFD_CLPB (Breakpoint)	-:11:72117000|+:11:103792500	130	0.15	0	PossibleLargeIndel	11:72117000
1	PTCD1	7	99045000	PTCD1 (Breakpoint)	+:7:99045000|-:7:98988000	38	0.13	0	PossibleLargeIndel	7:98988000
1	RPL19	17	37918500	RPL19 (Breakpoint)	+:17:37918500|-:17:37357500	2449	0.28	0	PossibleLargeIndel	17:37357500
1	RPL19	17	37921500	RPL19 (Breakpoint)	-:17:37359000|+:17:37921500	1331	0.24	0	PossibleLargeIndel	17:37359000
1	RPL19_IKZF3	17	37921500	RPL19_IKZF3 (Breakpoint)	-:17:37359000|+:17:37921500	1331	0.24	0	PossibleLargeIndel	17:37359000
1	SLC23A2	20	5112000	SLC23A2 (Breakpoint)	-:20:4900500|+:20:5112000	83	0.18	0	PossibleLargeIndel	20:4900500
1	SLC23A2_CDS2	20	5112000	SLC23A2_CDS2 (Breakpoint)	-:20:4900500|+:20:5112000	83	0.18	0	PossibleLargeIndel	20:4900500
1	SNX29	16	12117000	SNX29 (Breakpoint)	+:16:12117000|-:16:11535000	34	0.17	0	PossibleLargeIndel	16:11535000
1	STEAP2	7	89802000	STEAP2 (Breakpoint)	+:7:89802000|-:7:89871000	58	0.27	0	PossibleLargeIndel	7:89871000
1	UBE2D2	5	138921000	UBE2D2 (Breakpoint)	+:5:138921000|-:5:138741000	34	0.16	0	PossibleLargeIndel	5:138741000
1	ZC3H7A	16	11914500	ZC3H7A (Breakpoint)	-:16:11890500|+:16:11914500	26	0.1	0	PossibleLargeIndel	16:11890500
2	CMSS1	3	99813000	CMSS1 (Breakpoint)	-:3:99834000|+:3:99813000	27	0.13	0	PossibleLargeIndel	3:99834000
2	FILIP1L	3	99813000	FILIP1L (Breakpoint)	-:3:99834000|+:3:99813000	27	0.13	0	PossibleLargeIndel	3:99834000
3	ACER3	11	78146600	ACER3 (Breakpoint)	-:11:76615000|+:11:78146600	101	0.15	0	PossibleLargeIndel	11:76615000
3	AKAP13	15	88468800	AKAP13 (Breakpoint)	-:15:86042600|+:15:88468800	31	0.11	0	PossibleLargeIndel	15:86042600
3	AKAP13_NTRK3	15	88468800	AKAP13_NTRK3 (Breakpoint)	-:15:86042600|+:15:88468800	31	0.11	0	PossibleLargeIndel	15:86042600
3	DDHD2	8	38089800	DDHD2 (Breakpoint)	+:8:38089800|-:8:36801800	28	0.1	0	PossibleLargeIndel	8:36801800
3	GAB2	11	78107400	GAB2 (Breakpoint)	+:11:78107400|-:11:78114400	95	0.12	0	PossibleLargeIndel	11:78114400
3	KCNB2	8	73788400	KCNB2 (Breakpoint)	-:8:73794000|+:8:73788400	49	0.38	0	PossibleLargeIndel	8:73794000
3	LPXN	11	71066800	LPXN (Breakpoint)	+:11:71066800|-:11:58328200	45	0.17	0	PossibleLargeIndel	11:58328200
3	NTRK3_AKAP13	15	88468800	NTRK3_AKAP13 (Breakpoint)	-:15:86042600|+:15:88468800	31	0.11	0	PossibleLargeIndel	15:86042600
3	PACS1	6	67508000	PACS1 (Breakpoint)	-:11:65870000|+:6:67508000	32	0.14	0	Translocation	11:65870000
3	THSD4	15	71677200	THSD4 (Breakpoint)	-:15:93066400|+:15:71677200	25	0.1	0	PossibleLargeIndel	15:93066400
5	AGAP1	2	236817000	AGAP1 (Breakpoint)	+:2:236817000|-:2:236841000	35	0.17	0	PossibleLargeIndel	2:236841000
5	ASUN	12	27090000	ASUN (Breakpoint)	+:12:27090000|-:12:26944500	744	0.21	0	PossibleLargeIndel	12:26944500
5	ASUN_ITPR2	12	27090000	ASUN_ITPR2 (Breakpoint)	+:12:27090000|-:12:26944500	744	0.21	0	PossibleLargeIndel	12:26944500
5	AUTS2	7	70078500	AUTS2 (Breakpoint)	-:7:70125000|+:7:70078500	38	0.12	0	PossibleLargeIndel	7:70125000
5	C10ORF68	10	33015000	C10ORF68 (Breakpoint)	-:10:33058500|+:10:33015000	41	0.2	0	PossibleLargeIndel	10:33058500
5	C12orf40	12	40219500	C12orf40 (Breakpoint)	-:5:19666500|+:12:40219500	212	0.33	0	Translocation	5:19666500
5	CCDC91	12	28626000	CCDC91 (Breakpoint)	+:12:28626000|+:12:30969000	97	0.1	0	PossibleInversion	12:30969000
5	CCDC91	12	28620000	CCDC91 (Breakpoint)	-:12:34780500|+:12:28620000	109	0.11	0	PossibleLargeIndel	12:34780500
5	CDH18	12	40219500	CDH18 (Breakpoint)	-:5:19666500|+:12:40219500	212	0.33	0	Translocation	5:19666500
5	CDK8	13	26913000	CDK8 (Breakpoint)	-:13:60444000|+:13:26913000	45	0.27	0	PossibleLargeIndel	13:60444000
5	CDK8_DIAPH3	13	26913000	CDK8_DIAPH3 (Breakpoint)	-:13:60444000|+:13:26913000	45	0.27	0	PossibleLargeIndel	13:60444000
5	CDKN2A	9	21963000	CDKN2A (Breakpoint)	-:9:21970500|+:9:21963000	32	0.37	0	PossibleLargeIndel	9:21970500
5	CNGA1	4	44737500	CNGA1 (Breakpoint)	-:4:47994000|+:4:44737500	40	0.17	0	PossibleLargeIndel	4:47994000
5	CNGA1	4	44734500	CNGA1 (Breakpoint)	+:4:44734500|-:4:47992500	37	0.15	0	PossibleLargeIndel	4:47992500
5	CSMD1	8	3958500	CSMD1 (Breakpoint)	-:8:3988500|+:8:3958500	31	0.44	0	PossibleLargeIndel	8:3988500
5	DGKI	7	137464500	DGKI (Breakpoint)	-:7:137523000|+:7:137464500	55	0.18	0	PossibleLargeIndel	7:137523000
5	DGKI	7	137466000	DGKI (Breakpoint)	+:7:137466000|-:7:137526000	37	0.1	0	PossibleLargeIndel	7:137526000
5	DIAPH3	13	26913000	DIAPH3 (Breakpoint)	-:13:60444000|+:13:26913000	45	0.27	0	PossibleLargeIndel	13:60444000
5	DIAPH3	13	60375000	DIAPH3 (Breakpoint)	-:4:64990500|+:13:60375000	35	0.2	0	Translocation	4:64990500
5	DIAPH3_CDK8	13	26913000	DIAPH3_CDK8 (Breakpoint)	-:13:60444000|+:13:26913000	45	0.27	0	PossibleLargeIndel	13:60444000
5	DSG2	18	29092500	DSG2 (Breakpoint)	-:18:26428500|+:18:29092500	50	0.12	0	PossibleLargeIndel	18:26428500
5	EGFLAM	5	36558000	EGFLAM (Breakpoint)	+:5:36558000|-:5:38323500	266	0.44	0	PossibleLargeIndel	5:38323500
5	EXOC6	10	94650000	EXOC6 (Breakpoint)	-:10:94663500|+:10:94650000	35	0.2	0	PossibleLargeIndel	10:94663500
5	EYS	6	64408500	EYS (Breakpoint)	+:6:64408500|-:6:64486500	40	0.36	0	PossibleLargeIndel	6:64486500
5	FAM212B	1	112170000	FAM212B (Breakpoint)	-:1:112296000|+:1:112170000	32	0.18	0	PossibleLargeIndel	1:112296000
5	FAM212B_RAP1A	1	112170000	FAM212B_RAP1A (Breakpoint)	-:1:112296000|+:1:112170000	32	0.18	0	PossibleLargeIndel	1:112296000
5	GABRB1	14	34329000	GABRB1 (Breakpoint)	-:4:47251500|+:14:34329000	47	0.26	0	Translocation	4:47251500
5	GABRB1	4	47251500	GABRB1 (Breakpoint)	+:4:47251500|-:14:33814500	23	0.14	0	Translocation	14:33814500
5	GTSCR1	18	68314500	GTSCR1 (Breakpoint)	+:18:68314500|-:18:68371500	38	0.33	0	PossibleLargeIndel	18:68371500
5	HTRA1	10	124240500	HTRA1 (Breakpoint)	-:10:124245000|+:10:124240500	27	0.18	0	PossibleLargeIndel	10:124245000
5	ITPR2	12	27090000	ITPR2 (Breakpoint)	+:12:27090000|-:12:26944500	744	0.21	0	PossibleLargeIndel	12:26944500
5	ITPR2_ASUN	12	27090000	ITPR2_ASUN (Breakpoint)	+:12:27090000|-:12:26944500	744	0.21	0	PossibleLargeIndel	12:26944500
5	MACROD2	20	15267000	MACROD2 (Breakpoint)	+:20:15267000|-:20:15291000	43	0.18	0	PossibleLargeIndel	20:15291000
5	MACROD2	20	15270000	MACROD2 (Breakpoint)	-:20:15292500|+:20:15270000	25	0.13	0	PossibleLargeIndel	20:15292500
5	MGAT4C	12	86425500	MGAT4C (Breakpoint)	+:12:86425500|-:12:86434500	27	0.19	0	PossibleLargeIndel	12:86434500
5	NCKAP5	2	133491000	NCKAP5 (Breakpoint)	-:2:133507500|+:2:133491000	34	0.18	0	PossibleLargeIndel	2:133507500
5	NIPAL1	4	44737500	NIPAL1 (Breakpoint)	-:4:47994000|+:4:44737500	40	0.17	0	PossibleLargeIndel	4:47994000
5	NIPAL1	4	44734500	NIPAL1 (Breakpoint)	+:4:44734500|-:4:47992500	37	0.15	0	PossibleLargeIndel	4:47992500
5	OR4F6	15	102339000	OR4F6 (Breakpoint)	+:15:102339000|-:15:102346500	39	0.22	0	PossibleLargeIndel	15:102346500
5	PCDHA1	5	140350500	PCDHA1 (Breakpoint)	-:5:140487000|+:5:140350500	27	0.18	0	PossibleLargeIndel	5:140487000
5	PCDHA1	5	140352000	PCDHA1 (Breakpoint)	+:5:140352000|-:5:140490000	21	0.12	0	PossibleLargeIndel	5:140490000
5	PCDHA10	5	140350500	PCDHA10 (Breakpoint)	-:5:140487000|+:5:140350500	27	0.18	0	PossibleLargeIndel	5:140487000
5	PCDHA10	5	140352000	PCDHA10 (Breakpoint)	+:5:140352000|-:5:140490000	21	0.12	0	PossibleLargeIndel	5:140490000
5	PCDHA11	5	140350500	PCDHA11 (Breakpoint)	-:5:140487000|+:5:140350500	27	0.18	0	PossibleLargeIndel	5:140487000
5	PCDHA11	5	140352000	PCDHA11 (Breakpoint)	+:5:140352000|-:5:140490000	21	0.12	0	PossibleLargeIndel	5:140490000
5	PCDHA12	5	140350500	PCDHA12 (Breakpoint)	-:5:140487000|+:5:140350500	27	0.18	0	PossibleLargeIndel	5:140487000
5	PCDHA12	5	140352000	PCDHA12 (Breakpoint)	+:5:140352000|-:5:140490000	21	0.12	0	PossibleLargeIndel	5:140490000
5	PCDHA13	5	140350500	PCDHA13 (Breakpoint)	-:5:140487000|+:5:140350500	27	0.18	0	PossibleLargeIndel	5:140487000
5	PCDHA13	5	140352000	PCDHA13 (Breakpoint)	+:5:140352000|-:5:140490000	21	0.12	0	PossibleLargeIndel	5:140490000
5	PCDHA2	5	140350500	PCDHA2 (Breakpoint)	-:5:140487000|+:5:140350500	27	0.18	0	PossibleLargeIndel	5:140487000
5	PCDHA2	5	140352000	PCDHA2 (Breakpoint)	+:5:140352000|-:5:140490000	21	0.12	0	PossibleLargeIndel	5:140490000
5	PCDHA3	5	140350500	PCDHA3 (Breakpoint)	-:5:140487000|+:5:140350500	27	0.18	0	PossibleLargeIndel	5:140487000
5	PCDHA3	5	140352000	PCDHA3 (Breakpoint)	+:5:140352000|-:5:140490000	21	0.12	0	PossibleLargeIndel	5:140490000
5	PCDHA4	5	140350500	PCDHA4 (Breakpoint)	-:5:140487000|+:5:140350500	27	0.18	0	PossibleLargeIndel	5:140487000
5	PCDHA4	5	140352000	PCDHA4 (Breakpoint)	+:5:140352000|-:5:140490000	21	0.12	0	PossibleLargeIndel	5:140490000
5	PCDHA5	5	140350500	PCDHA5 (Breakpoint)	-:5:140487000|+:5:140350500	27	0.18	0	PossibleLargeIndel	5:140487000
5	PCDHA5	5	140352000	PCDHA5 (Breakpoint)	+:5:140352000|-:5:140490000	21	0.12	0	PossibleLargeIndel	5:140490000
5	PCDHA6	5	140350500	PCDHA6 (Breakpoint)	-:5:140487000|+:5:140350500	27	0.18	0	PossibleLargeIndel	5:140487000
5	PCDHA6	5	140352000	PCDHA6 (Breakpoint)	+:5:140352000|-:5:140490000	21	0.12	0	PossibleLargeIndel	5:140490000
5	PCDHA7	5	140350500	PCDHA7 (Breakpoint)	-:5:140487000|+:5:140350500	27	0.18	0	PossibleLargeIndel	5:140487000
5	PCDHA7	5	140352000	PCDHA7 (Breakpoint)	+:5:140352000|-:5:140490000	21	0.12	0	PossibleLargeIndel	5:140490000
5	PCDHA8	5	140350500	PCDHA8 (Breakpoint)	-:5:140487000|+:5:140350500	27	0.18	0	PossibleLargeIndel	5:140487000
5	PCDHA8	5	140352000	PCDHA8 (Breakpoint)	+:5:140352000|-:5:140490000	21	0.12	0	PossibleLargeIndel	5:140490000
5	PCDHA9	5	140350500	PCDHA9 (Breakpoint)	-:5:140487000|+:5:140350500	27	0.18	0	PossibleLargeIndel	5:140487000
5	PCDHA9	5	140352000	PCDHA9 (Breakpoint)	+:5:140352000|-:5:140490000	21	0.12	0	PossibleLargeIndel	5:140490000
5	PCDHAC1	5	140350500	PCDHAC1 (Breakpoint)	-:5:140487000|+:5:140350500	27	0.18	0	PossibleLargeIndel	5:140487000
5	PCDHAC1	5	140352000	PCDHAC1 (Breakpoint)	+:5:140352000|-:5:140490000	21	0.12	0	PossibleLargeIndel	5:140490000
5	PCDHAC2	5	140350500	PCDHAC2 (Breakpoint)	-:5:140487000|+:5:140350500	27	0.18	0	PossibleLargeIndel	5:140487000
5	PCDHAC2	5	140352000	PCDHAC2 (Breakpoint)	+:5:140352000|-:5:140490000	21	0.12	0	PossibleLargeIndel	5:140490000
5	PHF3	6	64408500	PHF3 (Breakpoint)	+:6:64408500|-:6:64486500	40	0.36	0	PossibleLargeIndel	6:64486500
5	RAP1A	1	112170000	RAP1A (Breakpoint)	-:1:112296000|+:1:112170000	32	0.18	0	PossibleLargeIndel	1:112296000
5	RAP1A_FAM212B	1	112170000	RAP1A_FAM212B (Breakpoint)	-:1:112296000|+:1:112170000	32	0.18	0	PossibleLargeIndel	1:112296000
5	SLC2A13	12	40219500	SLC2A13 (Breakpoint)	-:5:19666500|+:12:40219500	212	0.33	0	Translocation	5:19666500
5	UGDH	4	39517500	UGDH (Breakpoint)	+:4:39517500|+:4:64962000	48	0.2	0	PossibleInversion	4:64962000
5	UGDH	4	64963500	UGDH (Breakpoint)	+:4:64963500|+:4:39519000	46	0.29	0	PossibleInversion	4:39519000
5	UGDH	3	139156500	UGDH (Breakpoint)	-:4:39529500|+:3:139156500	84	0.35	0	Translocation	4:39529500
5	USP31	16	23022000	USP31 (Breakpoint)	+:16:23022000|-:16:23124000	25	0.15	0	PossibleLargeIndel	16:23124000
5	WDFY3	4	85770000	WDFY3 (Breakpoint)	+:4:85770000|-:4:85849500	35	0.18	0	PossibleLargeIndel	4:85849500
5	WNT2B	1	113034000	WNT2B (Breakpoint)	+:1:113034000|-:1:113056500	45	0.21	0	PossibleLargeIndel	1:113056500
7	ADCY2	5	1309500	ADCY2 (Breakpoint)	+:5:1309500|+:5:7756500	115	0.26	0	PossibleInversion	5:7756500
7	ADCY2	5	7758000	ADCY2 (Breakpoint)	+:5:7758000|+:5:1308000	113	0.36	0	PossibleInversion	5:1308000
7	ADCY2	5	20578500	ADCY2 (Breakpoint)	+:5:20578500|+:5:7734000	93	0.22	0	PossibleInversion	5:7734000
7	ADCY2	12	112695000	ADCY2 (Breakpoint)	-:5:7744500|-:12:112695000	88	0.2	0	Translocation	5:7744500
7	ADCY2	5	10773000	ADCY2 (Breakpoint)	-:5:7585500|+:5:10773000	128	0.28	0	PossibleLargeIndel	5:7585500
7	ADCY2	5	7743000	ADCY2 (Breakpoint)	-:12:112695000|-:5:7743000	65	0.22	0	Translocation	12:112695000
7	ADCY2_HECTD4	12	112695000	ADCY2_HECTD4 (Breakpoint)	-:5:7744500|-:12:112695000	88	0.2	0	Translocation	5:7744500
7	ADCY2_HECTD4	5	7743000	ADCY2_HECTD4 (Breakpoint)	-:12:112695000|-:5:7743000	65	0.22	0	Translocation	12:112695000
7	ANKS1B	12	78742500	ANKS1B (Breakpoint)	-:12:100204500|+:12:78742500	78	0.29	0	PossibleLargeIndel	12:100204500
7	ANKS1B	12	100204500	ANKS1B (Breakpoint)	-:12:123273000|-:12:100204500	41	0.15	0	PossibleInversion	12:123273000
7	ANKS1B	12	123259500	ANKS1B (Breakpoint)	+:12:123259500|+:12:100204500	31	0.14	0	PossibleInversion	12:100204500
7	ANKS1B_CCDC62	12	100204500	ANKS1B_CCDC62 (Breakpoint)	-:12:123273000|-:12:100204500	41	0.15	0	PossibleInversion	12:123273000
7	ANKS1B_CCDC62	12	123259500	ANKS1B_CCDC62 (Breakpoint)	+:12:123259500|+:12:100204500	31	0.14	0	PossibleInversion	12:100204500
7	ASIC1	12	115186500	ASIC1 (Breakpoint)	-:12:50458500|-:12:115186500	69	0.11	0	PossibleInversion	12:50458500
7	ASIC1	12	50457000	ASIC1 (Breakpoint)	-:12:115188000|-:12:50457000	68	0.1	0	PossibleInversion	12:115188000
7	CABP1	12	121080000	CABP1 (Breakpoint)	+:12:121080000|-:12:128635500	43	0.18	0	PossibleLargeIndel	12:128635500
7	CABP1	12	121083000	CABP1 (Breakpoint)	-:12:128637000|+:12:121083000	22	0.1	0	PossibleLargeIndel	12:128637000
7	CCDC152	12	129276000	CCDC152 (Breakpoint)	+:12:129276000|+:5:42790500	74	0.17	0	Translocation	5:42790500
7	CCDC152	12	61903500	CCDC152 (Breakpoint)	-:5:42760500|-:12:61903500	72	0.2	0	Translocation	5:42760500
7	CCDC152	5	42763500	CCDC152 (Breakpoint)	-:5:39831000|+:5:42763500	142	0.33	0	PossibleLargeIndel	5:39831000
7	CCDC152	5	42759000	CCDC152 (Breakpoint)	-:12:61905000|-:5:42759000	68	0.19	0	Translocation	12:61905000
7	CCDC152	5	42792000	CCDC152 (Breakpoint)	+:5:42792000|+:12:129277500	49	0.21	0	Translocation	12:129277500
7	CCDC152	5	42769500	CCDC152 (Breakpoint)	-:5:42769500|-:12:129307500	34	0.12	0	Translocation	12:129307500
7	CCDC152_SLC15A4	5	42769500	CCDC152_SLC15A4 (Breakpoint)	-:5:42769500|-:12:129307500	34	0.12	0	Translocation	12:129307500
7	CCDC62	12	123261000	CCDC62 (Breakpoint)	-:12:91972500|-:12:123261000	56	0.16	0	PossibleInversion	12:91972500
7	CCDC62	12	91971000	CCDC62 (Breakpoint)	-:12:123261000|-:12:91971000	49	0.2	0	PossibleInversion	12:123261000
7	CCDC62	12	100204500	CCDC62 (Breakpoint)	-:12:123273000|-:12:100204500	41	0.15	0	PossibleInversion	12:123273000
7	CCDC62	12	123270000	CCDC62 (Breakpoint)	-:12:123244500|+:12:123270000	34	0.13	0	PossibleLargeIndel	12:123244500
7	CCDC62	12	123271500	CCDC62 (Breakpoint)	+:12:123271500|-:12:123243000	33	0.24	0	PossibleLargeIndel	12:123243000
7	CCDC62	12	123259500	CCDC62 (Breakpoint)	+:12:123259500|+:12:100204500	31	0.14	0	PossibleInversion	12:100204500
7	CCDC62_ANKS1B	12	100204500	CCDC62_ANKS1B (Breakpoint)	-:12:123273000|-:12:100204500	41	0.15	0	PossibleInversion	12:123273000
7	CCDC62_ANKS1B	12	123259500	CCDC62_ANKS1B (Breakpoint)	+:12:123259500|+:12:100204500	31	0.14	0	PossibleInversion	12:100204500
7	CCDC62_DENR	12	123270000	CCDC62_DENR (Breakpoint)	-:12:123244500|+:12:123270000	34	0.13	0	PossibleLargeIndel	12:123244500
7	CDH18	5	14916000	CDH18 (Breakpoint)	-:5:20520000|-:5:14916000	39	0.12	0	PossibleInversion	5:20520000
7	CDH18	5	20518500	CDH18 (Breakpoint)	-:5:14916000|-:5:20518500	32	0.14	0	PossibleInversion	5:14916000
7	CNTN1	12	42028500	CNTN1 (Breakpoint)	+:12:42028500|-:12:41329500	26	0.17	0	PossibleLargeIndel	12:41329500
7	DAZAP2	12	51634500	DAZAP2 (Breakpoint)	+:12:51634500|-:12:126907500	48	0.19	0	PossibleLargeIndel	12:126907500
7	DENR	12	123270000	DENR (Breakpoint)	-:12:123244500|+:12:123270000	34	0.13	0	PossibleLargeIndel	12:123244500
7	DENR	12	123271500	DENR (Breakpoint)	+:12:123271500|-:12:123243000	33	0.24	0	PossibleLargeIndel	12:123243000
7	DENR_CCDC62	12	123270000	DENR_CCDC62 (Breakpoint)	-:12:123244500|+:12:123270000	34	0.13	0	PossibleLargeIndel	12:123244500
7	DNAH10	5	37749000	DNAH10 (Breakpoint)	+:5:37749000|-:12:124377000	128	0.27	0	Translocation	12:124377000
7	DNAH10	12	124371000	DNAH10 (Breakpoint)	-:12:129274500|+:12:124371000	131	0.23	0	PossibleLargeIndel	12:129274500
7	DNAH10	5	27523500	DNAH10 (Breakpoint)	-:12:124342500|-:5:27523500	56	0.13	0	Translocation	12:124342500
7	DNAH10	12	124341000	DNAH10 (Breakpoint)	-:5:27523500|-:12:124341000	42	0.21	0	Translocation	5:27523500
7	DNAH10_WDR70	5	37749000	DNAH10_WDR70 (Breakpoint)	+:5:37749000|-:12:124377000	128	0.27	0	Translocation	12:124377000
7	FBXL7	5	15712500	FBXL7 (Breakpoint)	+:5:15712500|+:12:72172500	64	0.16	0	Translocation	12:72172500
7	FBXL7	12	69439500	FBXL7 (Breakpoint)	+:12:69439500|-:5:15705000	99	0.2	0	Translocation	5:15705000
7	FBXL7	12	70314000	FBXL7 (Breakpoint)	+:12:70314000|+:5:15700500	40	0.11	0	Translocation	5:15700500
7	FBXL7	5	15702000	FBXL7 (Breakpoint)	+:5:15702000|+:12:70315500	39	0.16	0	Translocation	12:70315500
7	FBXL7	12	72174000	FBXL7 (Breakpoint)	+:12:72174000|+:5:15714000	36	0.14	0	Translocation	5:15714000
7	FBXL7_MYRFL	12	70314000	FBXL7_MYRFL (Breakpoint)	+:12:70314000|+:5:15700500	40	0.11	0	Translocation	5:15700500
7	FBXL7_MYRFL	5	15702000	FBXL7_MYRFL (Breakpoint)	+:5:15702000|+:12:70315500	39	0.16	0	Translocation	12:70315500
7	FBXL7_RAB21	5	15712500	FBXL7_RAB21 (Breakpoint)	+:5:15712500|+:12:72172500	64	0.16	0	Translocation	12:72172500
7	FBXL7_RAB21	12	72174000	FBXL7_RAB21 (Breakpoint)	+:12:72174000|+:5:15714000	36	0.14	0	Translocation	5:15714000
7	FNDC3A	13	49651500	FNDC3A (Breakpoint)	+:13:49651500|-:13:48510000	26	0.16	0	PossibleLargeIndel	13:48510000
7	FOXP2	7	114145500	FOXP2 (Breakpoint)	-:7:107332500|+:7:114145500	57	0.29	0	PossibleLargeIndel	7:107332500
7	FOXP2	7	113410500	FOXP2 (Breakpoint)	+:7:113410500|-:7:114123000	26	0.17	0	PossibleLargeIndel	7:114123000
7	FOXP2_SLC26A4	7	114145500	FOXP2_SLC26A4 (Breakpoint)	-:7:107332500|+:7:114145500	57	0.29	0	PossibleLargeIndel	7:107332500
7	GAS2L3	12	100999500	GAS2L3 (Breakpoint)	+:12:100999500|-:12:126097500	33	0.1	0	PossibleLargeIndel	12:126097500
7	GAS2L3_TMEM132B	12	100999500	GAS2L3_TMEM132B (Breakpoint)	+:12:100999500|-:12:126097500	33	0.1	0	PossibleLargeIndel	12:126097500
7	GHR	5	42709500	GHR (Breakpoint)	+:5:42709500|-:20:12439500	26	0.21	0	Translocation	20:12439500
7	HECTD4	12	112695000	HECTD4 (Breakpoint)	-:5:7744500|-:12:112695000	88	0.2	0	Translocation	5:7744500
7	HECTD4	5	7743000	HECTD4 (Breakpoint)	-:12:112695000|-:5:7743000	65	0.22	0	Translocation	12:112695000
7	HECTD4	12	129544500	HECTD4 (Breakpoint)	+:12:129544500|-:12:112686000	53	0.17	0	PossibleLargeIndel	12:112686000
7	HECTD4	12	112692000	HECTD4 (Breakpoint)	+:12:112692000|+:5:18933000	33	0.17	0	Translocation	5:18933000
7	HECTD4	12	129547500	HECTD4 (Breakpoint)	-:12:112687500|+:12:129547500	27	0.12	0	PossibleLargeIndel	12:112687500
7	HECTD4_ADCY2	12	112695000	HECTD4_ADCY2 (Breakpoint)	-:5:7744500|-:12:112695000	88	0.2	0	Translocation	5:7744500
7	HECTD4_ADCY2	5	7743000	HECTD4_ADCY2 (Breakpoint)	-:12:112695000|-:5:7743000	65	0.22	0	Translocation	12:112695000
7	KERA	12	91444500	KERA (Breakpoint)	+:12:91444500|-:12:98586000	50	0.15	0	PossibleLargeIndel	12:98586000
7	MYO10	5	14454000	MYO10 (Breakpoint)	+:5:14454000|-:5:16687500	51	0.14	0	PossibleLargeIndel	5:16687500
7	MYO10_TRIO	5	14454000	MYO10_TRIO (Breakpoint)	+:5:14454000|-:5:16687500	51	0.14	0	PossibleLargeIndel	5:16687500
7	MYRFL	12	70314000	MYRFL (Breakpoint)	+:12:70314000|+:5:15700500	40	0.11	0	Translocation	5:15700500
7	MYRFL	5	15702000	MYRFL (Breakpoint)	+:5:15702000|+:12:70315500	39	0.16	0	Translocation	12:70315500
7	MYRFL_FBXL7	12	70314000	MYRFL_FBXL7 (Breakpoint)	+:12:70314000|+:5:15700500	40	0.11	0	Translocation	5:15700500
7	MYRFL_FBXL7	5	15702000	MYRFL_FBXL7 (Breakpoint)	+:5:15702000|+:12:70315500	39	0.16	0	Translocation	12:70315500
7	NIPBL	5	32638500	NIPBL (Breakpoint)	+:5:32638500|-:5:37036500	120	0.28	0	PossibleLargeIndel	5:37036500
7	NUP107	12	69093000	NUP107 (Breakpoint)	-:5:15087000|+:12:69093000	227	0.49	0	Translocation	5:15087000
7	NUP107	12	95091000	NUP107 (Breakpoint)	+:12:95091000|-:12:69084000	188	0.47	0	PossibleLargeIndel	12:69084000
7	NUP107	12	95091000	NUP107 (Breakpoint)	-:12:69096000|-:12:95091000	54	0.17	0	PossibleInversion	12:69096000
7	NUP107	12	69094500	NUP107 (Breakpoint)	-:12:95091000|-:12:69094500	32	0.17	0	PossibleInversion	12:95091000
7	NUP107	12	95094000	NUP107 (Breakpoint)	-:12:69085500|+:12:95094000	31	0.1	0	PossibleLargeIndel	12:69085500
7	PDCD6	5	20581500	PDCD6 (Breakpoint)	-:5:277500|-:5:20581500	60	0.14	0	PossibleInversion	5:277500
7	PDCD6	5	276000	PDCD6 (Breakpoint)	-:5:20580000|-:5:276000	52	0.13	0	PossibleInversion	5:20580000
7	PDZD2	5	21750000	PDZD2 (Breakpoint)	+:5:21750000|-:5:31903500	36	0.1	0	PossibleLargeIndel	5:31903500
7	PDZD2	5	31828500	PDZD2 (Breakpoint)	+:5:31828500|-:5:21417000	43	0.1	0	PossibleLargeIndel	5:21417000
7	PPP1R12A	12	69070500	PPP1R12A (Breakpoint)	-:12:80241000|-:12:69070500	56	0.19	0	PossibleInversion	12:80241000
7	PPP1R12A	12	80242500	PPP1R12A (Breakpoint)	-:12:69072000|-:12:80242500	51	0.12	0	PossibleInversion	12:69072000
7	RAB21	5	15712500	RAB21 (Breakpoint)	+:5:15712500|+:12:72172500	64	0.16	0	Translocation	12:72172500
7	RAB21	12	72153000	RAB21 (Breakpoint)	-:12:72709500|-:12:72153000	55	0.13	0	PossibleInversion	12:72709500
7	RAB21	12	72708000	RAB21 (Breakpoint)	-:12:72153000|-:12:72708000	53	0.17	0	PossibleInversion	12:72153000
7	RAB21	12	72174000	RAB21 (Breakpoint)	+:12:72174000|+:5:15714000	36	0.14	0	Translocation	5:15714000
7	RAB21_FBXL7	5	15712500	RAB21_FBXL7 (Breakpoint)	+:5:15712500|+:12:72172500	64	0.16	0	Translocation	12:72172500
7	RAB21_FBXL7	12	72174000	RAB21_FBXL7 (Breakpoint)	+:12:72174000|+:5:15714000	36	0.14	0	Translocation	5:15714000
7	RAB21_TRHDE	12	72153000	RAB21_TRHDE (Breakpoint)	-:12:72709500|-:12:72153000	55	0.13	0	PossibleInversion	12:72709500
7	RAB21_TRHDE	12	72708000	RAB21_TRHDE (Breakpoint)	-:12:72153000|-:12:72708000	53	0.17	0	PossibleInversion	12:72153000
7	SLC15A4	5	42769500	SLC15A4 (Breakpoint)	-:5:42769500|-:12:129307500	34	0.12	0	Translocation	12:129307500
7	SLC15A4_CCDC152	5	42769500	SLC15A4_CCDC152 (Breakpoint)	-:5:42769500|-:12:129307500	34	0.12	0	Translocation	12:129307500
7	SLC26A4	7	114145500	SLC26A4 (Breakpoint)	-:7:107332500|+:7:114145500	57	0.29	0	PossibleLargeIndel	7:107332500
7	SLC26A4_FOXP2	7	114145500	SLC26A4_FOXP2 (Breakpoint)	-:7:107332500|+:7:114145500	57	0.29	0	PossibleLargeIndel	7:107332500
7	SMARCD1	12	115155000	SMARCD1 (Breakpoint)	-:12:50484000|+:12:115155000	69	0.13	0	PossibleLargeIndel	12:50484000
7	SMARCD1	12	115152000	SMARCD1 (Breakpoint)	+:12:115152000|-:12:50482500	68	0.14	0	PossibleLargeIndel	12:50482500
7	SMARCD1	12	50487000	SMARCD1 (Breakpoint)	+:12:50487000|+:12:50482500	59	0.39	0	PossibleInversion	12:50482500
7	SMARCD1	12	50481000	SMARCD1 (Breakpoint)	+:12:50481000|+:12:50485500	57	0.21	0	PossibleInversion	12:50485500
7	SYT1	5	15069000	SYT1 (Breakpoint)	-:12:79353000|+:5:15069000	115	0.36	0	Translocation	12:79353000
7	SYT1	12	73056000	SYT1 (Breakpoint)	+:12:73056000|+:12:79444500	41	0.24	0	PossibleInversion	12:79444500
7	SYT1	12	79444500	SYT1 (Breakpoint)	+:12:79444500|+:12:73054500	35	0.15	0	PossibleInversion	12:73054500
7	SYT1	5	15070500	SYT1 (Breakpoint)	+:5:15070500|-:12:79356000	33	0.13	0	Translocation	12:79356000
7	SYT1_TRHDE	12	73056000	SYT1_TRHDE (Breakpoint)	+:12:73056000|+:12:79444500	41	0.24	0	PossibleInversion	12:79444500
7	SYT1_TRHDE	12	79444500	SYT1_TRHDE (Breakpoint)	+:12:79444500|+:12:73054500	35	0.15	0	PossibleInversion	12:73054500
7	TMEM132B	12	100999500	TMEM132B (Breakpoint)	+:12:100999500|-:12:126097500	33	0.1	0	PossibleLargeIndel	12:126097500
7	TMEM132B_GAS2L3	12	100999500	TMEM132B_GAS2L3 (Breakpoint)	+:12:100999500|-:12:126097500	33	0.1	0	PossibleLargeIndel	12:126097500
7	TRHDE	12	73035000	TRHDE (Breakpoint)	+:12:73035000|+:12:98617500	66	0.21	0	PossibleInversion	12:98617500
7	TRHDE	12	95079000	TRHDE (Breakpoint)	+:12:95079000|-:12:73035000	121	0.3	0	PossibleLargeIndel	12:73035000
7	TRHDE	12	72153000	TRHDE (Breakpoint)	-:12:72709500|-:12:72153000	55	0.13	0	PossibleInversion	12:72709500
7	TRHDE	12	72708000	TRHDE (Breakpoint)	-:12:72153000|-:12:72708000	53	0.17	0	PossibleInversion	12:72153000
7	TRHDE	12	98619000	TRHDE (Breakpoint)	+:12:98619000|+:12:73036500	44	0.13	0	PossibleInversion	12:73036500
7	TRHDE	12	73056000	TRHDE (Breakpoint)	+:12:73056000|+:12:79444500	41	0.24	0	PossibleInversion	12:79444500
7	TRHDE	12	79444500	TRHDE (Breakpoint)	+:12:79444500|+:12:73054500	35	0.15	0	PossibleInversion	12:73054500
7	TRHDE_RAB21	12	72153000	TRHDE_RAB21 (Breakpoint)	-:12:72709500|-:12:72153000	55	0.13	0	PossibleInversion	12:72709500
7	TRHDE_RAB21	12	72708000	TRHDE_RAB21 (Breakpoint)	-:12:72153000|-:12:72708000	53	0.17	0	PossibleInversion	12:72153000
7	TRHDE_SYT1	12	73056000	TRHDE_SYT1 (Breakpoint)	+:12:73056000|+:12:79444500	41	0.24	0	PossibleInversion	12:79444500
7	TRHDE_SYT1	12	79444500	TRHDE_SYT1 (Breakpoint)	+:12:79444500|+:12:73054500	35	0.15	0	PossibleInversion	12:73054500
7	TRIO	5	44001000	TRIO (Breakpoint)	-:5:14154000|+:5:44001000	79	0.28	0	PossibleLargeIndel	5:14154000
7	TRIO	5	14454000	TRIO (Breakpoint)	+:5:14454000|-:5:16687500	51	0.14	0	PossibleLargeIndel	5:16687500
7	TRIO_MYO10	5	14454000	TRIO_MYO10 (Breakpoint)	+:5:14454000|-:5:16687500	51	0.14	0	PossibleLargeIndel	5:16687500
7	UGP2	2	65046000	UGP2 (Breakpoint)	+:2:65046000|-:2:64114500	43	0.2	0	PossibleLargeIndel	2:64114500
7	USP15	12	61117500	USP15 (Breakpoint)	-:12:62791500|+:12:61117500	65	0.31	0	PossibleLargeIndel	12:62791500
7	USP15	12	62794500	USP15 (Breakpoint)	+:12:62794500|+:12:110983500	23	0.12	0	PossibleInversion	12:110983500
7	WDR70	5	37753500	WDR70 (Breakpoint)	+:5:37753500|-:5:42753000	140	0.43	0	PossibleLargeIndel	5:42753000
7	WDR70	5	37749000	WDR70 (Breakpoint)	+:5:37749000|-:12:124377000	128	0.27	0	Translocation	12:124377000
7	WDR70_DNAH10	5	37749000	WDR70_DNAH10 (Breakpoint)	+:5:37749000|-:12:124377000	128	0.27	0	Translocation	12:124377000
9	ACTR3C	7	133570500	ACTR3C (Breakpoint)	-:7:149965500|-:7:133570500	28	0.24	0	PossibleInversion	7:149965500
9	ACTR3C_EXOC4	7	133570500	ACTR3C_EXOC4 (Breakpoint)	-:7:149965500|-:7:133570500	28	0.24	0	PossibleInversion	7:149965500
9	ALDH9A1	1	165418500	ALDH9A1 (Breakpoint)	-:1:165664500|+:1:165418500	37	0.3	0	PossibleLargeIndel	1:165664500
9	ATF7	12	53959500	ATF7 (Breakpoint)	-:12:53985000|+:12:53959500	31	0.22	0	PossibleLargeIndel	12:53985000
9	C16orf62	16	19576500	C16orf62 (Breakpoint)	-:5:24621000|+:16:19576500	25	0.12	0	Translocation	5:24621000
9	C16orf62_CDH10	16	19576500	C16orf62_CDH10 (Breakpoint)	-:5:24621000|+:16:19576500	25	0.12	0	Translocation	5:24621000
9	CALCR	7	93135000	CALCR (Breakpoint)	+:7:93135000|+:7:125697000	25	0.12	0	PossibleInversion	7:125697000
9	CDH10	16	19576500	CDH10 (Breakpoint)	-:5:24621000|+:16:19576500	25	0.12	0	Translocation	5:24621000
9	CDH10_C16orf62	16	19576500	CDH10_C16orf62 (Breakpoint)	-:5:24621000|+:16:19576500	25	0.12	0	Translocation	5:24621000
9	CNBD1	8	88408500	CNBD1 (Breakpoint)	-:8:88456500|+:8:88408500	31	0.17	0	PossibleLargeIndel	8:88456500
9	CPE	4	166363500	CPE (Breakpoint)	+:4:166363500|-:4:166402500	31	0.22	0	PossibleLargeIndel	4:166402500
9	EXOC4	7	133570500	EXOC4 (Breakpoint)	-:7:149965500|-:7:133570500	28	0.24	0	PossibleInversion	7:149965500
9	EXOC4	7	133539000	EXOC4 (Breakpoint)	+:7:133539000|+:7:146598000	20	0.22	0	PossibleInversion	7:146598000
9	EXOC4_ACTR3C	7	133570500	EXOC4_ACTR3C (Breakpoint)	-:7:149965500|-:7:133570500	28	0.24	0	PossibleInversion	7:149965500
9	FBXL19	16	22099500	FBXL19 (Breakpoint)	-:16:30934500|+:16:22099500	44	0.37	0	PossibleLargeIndel	16:30934500
9	FIBCD1	13	111757500	FIBCD1 (Breakpoint)	-:9:133797000|+:13:111757500	62	0.41	0	Translocation	9:133797000
9	GEN1	2	18066000	GEN1 (Breakpoint)	-:2:17959500|+:2:18066000	26	0.15	0	PossibleLargeIndel	2:17959500
9	KCNS3	2	18066000	KCNS3 (Breakpoint)	-:2:17959500|+:2:18066000	26	0.15	0	PossibleLargeIndel	2:17959500
9	KIF18A	7	9411000	KIF18A (Breakpoint)	+:7:9411000|-:11:28125000	26	0.12	0	Translocation	11:28125000
9	LPP	3	188298000	LPP (Breakpoint)	-:3:188310000|+:3:188298000	25	0.16	0	PossibleLargeIndel	3:188310000
9	LSAMP	3	117093000	LSAMP (Breakpoint)	-:3:117075000|+:3:117093000	32	0.14	0	PossibleLargeIndel	3:117075000
9	MTAP	9	21892500	MTAP (Breakpoint)	-:9:22146000|+:9:21892500	49	0.47	0	PossibleLargeIndel	9:22146000
9	PCDH9	13	67620000	PCDH9 (Breakpoint)	+:13:67620000|-:13:68149500	32	0.2	0	PossibleLargeIndel	13:68149500
9	PCDH9	13	67621500	PCDH9 (Breakpoint)	-:13:68151000|+:13:67621500	20	0.1	0	PossibleLargeIndel	13:68151000
9	PRMT3	11	20637000	PRMT3 (Breakpoint)	+:11:20637000|-:11:20523000	25	0.12	0	PossibleLargeIndel	11:20523000
9	PRMT3_SLC6A5	11	20637000	PRMT3_SLC6A5 (Breakpoint)	+:11:20637000|-:11:20523000	25	0.12	0	PossibleLargeIndel	11:20523000
9	PTPRN2	7	157474500	PTPRN2 (Breakpoint)	+:7:157474500|-:7:157726500	36	0.2	0	PossibleLargeIndel	7:157726500
9	PTPRN2	7	157477500	PTPRN2 (Breakpoint)	-:7:157728000|+:7:157477500	33	0.24	0	PossibleLargeIndel	7:157728000
9	SLC6A5	11	20637000	SLC6A5 (Breakpoint)	+:11:20637000|-:11:20523000	25	0.12	0	PossibleLargeIndel	11:20523000
9	SLC6A5_PRMT3	11	20637000	SLC6A5_PRMT3 (Breakpoint)	+:11:20637000|-:11:20523000	25	0.12	0	PossibleLargeIndel	11:20523000
9	SMC6	2	18066000	SMC6 (Breakpoint)	-:2:17959500|+:2:18066000	26	0.15	0	PossibleLargeIndel	2:17959500
9	SPOCK3	4	167809500	SPOCK3 (Breakpoint)	-:4:167829000|+:4:167809500	46	0.28	0	PossibleLargeIndel	4:167829000
9	SPOCK3	4	167734500	SPOCK3 (Breakpoint)	-:7:125697000|+:4:167734500	29	0.15	0	Translocation	7:125697000
9	SRRM3	7	75912000	SRRM3 (Breakpoint)	-:7:75744000|+:7:75912000	25	0.15	0	PossibleLargeIndel	7:75744000
9	TLL1	4	166938000	TLL1 (Breakpoint)	+:4:166938000|-:7:125710500	41	0.2	0	Translocation	7:125710500
9	XYLT1	16	17350500	XYLT1 (Breakpoint)	-:5:595500|+:16:17350500	39	0.15	0	Translocation	5:595500
9	ZNF35	3	44700000	ZNF35 (Breakpoint)	+:3:44700000|-:3:44703000	31	0.26	0	PossibleLargeIndel	3:44703000
10	A1CF	10	53041800	A1CF (Breakpoint)	-:10:52584000|+:10:53041800	25	0.12	0	PossibleLargeIndel	10:52584000
10	A1CF_PRKG1	10	53041800	A1CF_PRKG1 (Breakpoint)	-:10:52584000|+:10:53041800	25	0.12	0	PossibleLargeIndel	10:52584000
10	ANO3	11	26649000	ANO3 (Breakpoint)	-:6:26125400|+:11:26649000	25	0.16	0	Translocation	6:26125400
10	ANO3_HIST1H2AC	11	26649000	ANO3_HIST1H2AC (Breakpoint)	-:6:26125400|+:11:26649000	25	0.16	0	Translocation	6:26125400
10	ARHGEF17	6	25022200	ARHGEF17 (Breakpoint)	-:11:73054800|+:6:25022200	30	0.1	0	Translocation	11:73054800
10	ARHGEF17_FAM65B	6	25022200	ARHGEF17_FAM65B (Breakpoint)	-:11:73054800|+:6:25022200	30	0.1	0	Translocation	11:73054800
10	C11orf74	11	65639000	C11orf74 (Breakpoint)	+:11:65639000|-:11:36618400	26	0.2	0	PossibleLargeIndel	11:36618400
10	C2CD3	11	73733800	C2CD3 (Breakpoint)	+:11:73733800|-:10:69522600	38	0.11	0	Translocation	10:69522600
10	CAP2	11	16423400	CAP2 (Breakpoint)	+:11:16423400|-:6:17542000	58	0.29	0	Translocation	6:17542000
10	CAP2_SOX6	11	16423400	CAP2_SOX6 (Breakpoint)	+:11:16423400|-:6:17542000	58	0.29	0	Translocation	6:17542000
10	CTTN	11	21441000	CTTN (Breakpoint)	+:11:21441000|-:11:70250600	26	0.16	0	PossibleLargeIndel	11:70250600
10	CTTN_NELL1	11	21441000	CTTN_NELL1 (Breakpoint)	+:11:21441000|-:11:70250600	26	0.16	0	PossibleLargeIndel	11:70250600
10	DTNBP1	11	69217400	DTNBP1 (Breakpoint)	-:6:15547000|+:11:69217400	28	0.17	0	Translocation	6:15547000
10	EFCAB5	17	27987400	EFCAB5 (Breakpoint)	+:17:27987400|-:17:28285600	26	0.19	0	PossibleLargeIndel	17:28285600
10	EFCAB5_SSH2	17	27987400	EFCAB5_SSH2 (Breakpoint)	+:17:27987400|-:17:28285600	26	0.19	0	PossibleLargeIndel	17:28285600
10	EFEMP2	11	65639000	EFEMP2 (Breakpoint)	+:11:65639000|-:11:36618400	26	0.2	0	PossibleLargeIndel	11:36618400
10	EHMT2	6	31267600	EHMT2 (Breakpoint)	-:6:31848600|+:6:31267600	27	0.17	0	PossibleLargeIndel	6:31848600
10	EYS	6	65853200	EYS (Breakpoint)	-:6:66126200|+:6:65853200	63	0.32	0	PossibleLargeIndel	6:66126200
10	EYS	6	64575000	EYS (Breakpoint)	-:6:65027200|+:6:64575000	39	0.22	0	PossibleLargeIndel	6:65027200
10	FAM168A	11	35299600	FAM168A (Breakpoint)	-:11:73291400|+:11:35299600	27	0.1	0	PossibleLargeIndel	11:73291400
10	FAM168A_SLC1A2	11	35299600	FAM168A_SLC1A2 (Breakpoint)	-:11:73291400|+:11:35299600	27	0.1	0	PossibleLargeIndel	11:73291400
10	FAM65B	6	25022200	FAM65B (Breakpoint)	-:11:73054800|+:6:25022200	30	0.1	0	Translocation	11:73054800
10	FAM65B_ARHGEF17	6	25022200	FAM65B_ARHGEF17 (Breakpoint)	-:11:73054800|+:6:25022200	30	0.1	0	Translocation	11:73054800
10	GLIS3	9	4104800	GLIS3 (Breakpoint)	-:9:4291000|+:9:4104800	26	0.2	0	PossibleLargeIndel	9:4291000
10	HIST1H2AC	11	26649000	HIST1H2AC (Breakpoint)	-:6:26125400|+:11:26649000	25	0.16	0	Translocation	6:26125400
10	HIST1H2AC_ANO3	11	26649000	HIST1H2AC_ANO3 (Breakpoint)	-:6:26125400|+:11:26649000	25	0.16	0	Translocation	6:26125400
10	JMJD1C	10	65185400	JMJD1C (Breakpoint)	+:10:65185400|-:10:65296000	27	0.18	0	PossibleLargeIndel	10:65296000
10	JMJD1C_REEP3	10	65185400	JMJD1C_REEP3 (Breakpoint)	+:10:65185400|-:10:65296000	27	0.18	0	PossibleLargeIndel	10:65296000
10	KCNQ5	11	79277800	KCNQ5 (Breakpoint)	-:6:73582600|+:11:79277800	321	0.36	0	Translocation	6:73582600
10	KCNQ5	11	79279200	KCNQ5 (Breakpoint)	+:11:79279200|-:6:73585400	105	0.14	0	Translocation	6:73585400
10	KHDRBS2	11	78790600	KHDRBS2 (Breakpoint)	-:6:62479200|+:11:78790600	88	0.1	0	Translocation	6:62479200
10	KHDRBS2_TENM4	11	78790600	KHDRBS2_TENM4 (Breakpoint)	-:6:62479200|+:11:78790600	88	0.1	0	Translocation	6:62479200
10	LECT2	5	135277800	LECT2 (Breakpoint)	+:5:135277800|-:5:135283400	28	0.24	0	PossibleLargeIndel	5:135283400
10	MPPED2	11	11646600	MPPED2 (Breakpoint)	+:11:11646600|-:11:30550800	27	0.16	0	PossibleLargeIndel	11:30550800
10	MRPL11	10	69546400	MRPL11 (Breakpoint)	-:11:66208800|+:10:69546400	26	0.16	0	Translocation	11:66208800
10	NELL1	11	21441000	NELL1 (Breakpoint)	+:11:21441000|-:11:70250600	26	0.16	0	PossibleLargeIndel	11:70250600
10	NELL1_CTTN	11	21441000	NELL1_CTTN (Breakpoint)	+:11:21441000|-:11:70250600	26	0.16	0	PossibleLargeIndel	11:70250600
10	PAAF1	11	27336400	PAAF1 (Breakpoint)	+:11:27336400|-:11:73631600	29	0.11	0	PossibleLargeIndel	11:73631600
10	PC	11	30149000	PC (Breakpoint)	+:11:30149000|-:11:66616200	28	0.21	0	PossibleLargeIndel	11:66616200
10	PDE2A	6	63320600	PDE2A (Breakpoint)	-:11:72305800|+:6:63320600	44	0.11	0	Translocation	11:72305800
10	PPARD	6	41388200	PPARD (Breakpoint)	-:6:35354200|+:6:41388200	49	0.23	0	PossibleLargeIndel	6:35354200
10	PRKG1	10	53041800	PRKG1 (Breakpoint)	-:10:52584000|+:10:53041800	25	0.12	0	PossibleLargeIndel	10:52584000
10	PRKG1_A1CF	10	53041800	PRKG1_A1CF (Breakpoint)	-:10:52584000|+:10:53041800	25	0.12	0	PossibleLargeIndel	10:52584000
10	PRKRIR	11	76073200	PRKRIR (Breakpoint)	-:6:75287800|+:11:76073200	60	0.13	0	Translocation	6:75287800
10	RAG2	11	65639000	RAG2 (Breakpoint)	+:11:65639000|-:11:36618400	26	0.2	0	PossibleLargeIndel	11:36618400
10	REEP3	10	65185400	REEP3 (Breakpoint)	+:10:65185400|-:10:65296000	27	0.18	0	PossibleLargeIndel	10:65296000
10	REEP3_JMJD1C	10	65185400	REEP3_JMJD1C (Breakpoint)	+:10:65185400|-:10:65296000	27	0.18	0	PossibleLargeIndel	10:65296000
10	SHANK2	11	78663200	SHANK2 (Breakpoint)	-:11:70903000|+:11:78663200	93	0.1	0	PossibleLargeIndel	11:70903000
10	SHANK2	11	70470400	SHANK2 (Breakpoint)	-:11:36551200|+:11:70470400	24	0.2	0	PossibleLargeIndel	11:36551200
10	SHANK2_TENM4	11	78663200	SHANK2_TENM4 (Breakpoint)	-:11:70903000|+:11:78663200	93	0.1	0	PossibleLargeIndel	11:70903000
10	SLC17A5	6	74622800	SLC17A5 (Breakpoint)	+:6:74622800|+:6:74316200	87	0.13	0	PossibleInversion	6:74316200
10	SLC1A2	11	35299600	SLC1A2 (Breakpoint)	-:11:73291400|+:11:35299600	27	0.1	0	PossibleLargeIndel	11:73291400
10	SLC1A2_FAM168A	11	35299600	SLC1A2_FAM168A (Breakpoint)	-:11:73291400|+:11:35299600	27	0.1	0	PossibleLargeIndel	11:73291400
10	SOX6	11	16423400	SOX6 (Breakpoint)	+:11:16423400|-:6:17542000	58	0.29	0	Translocation	6:17542000
10	SOX6_CAP2	11	16423400	SOX6_CAP2 (Breakpoint)	+:11:16423400|-:6:17542000	58	0.29	0	Translocation	6:17542000
10	SSH2	17	27987400	SSH2 (Breakpoint)	+:17:27987400|-:17:28285600	26	0.19	0	PossibleLargeIndel	17:28285600
10	SSH2_EFCAB5	17	27987400	SSH2_EFCAB5 (Breakpoint)	+:17:27987400|-:17:28285600	26	0.19	0	PossibleLargeIndel	17:28285600
10	TENM4	11	78790600	TENM4 (Breakpoint)	-:6:62479200|+:11:78790600	88	0.1	0	Translocation	6:62479200
10	TENM4	11	78663200	TENM4 (Breakpoint)	-:11:70903000|+:11:78663200	93	0.1	0	PossibleLargeIndel	11:70903000
10	TENM4_KHDRBS2	11	78790600	TENM4_KHDRBS2 (Breakpoint)	-:6:62479200|+:11:78790600	88	0.1	0	Translocation	6:62479200
10	TENM4_SHANK2	11	78663200	TENM4_SHANK2 (Breakpoint)	-:11:70903000|+:11:78663200	93	0.1	0	PossibleLargeIndel	11:70903000
10	ZNF195	11	3365600	ZNF195 (Breakpoint)	-:11:69883800|+:11:3365600	30	0.16	0	PossibleLargeIndel	11:69883800
11	AMOTL1	11	100834500	AMOTL1 (Breakpoint)	-:11:94561500|+:11:100834500	33	0.12	0	PossibleLargeIndel	11:94561500
11	AMOTL1_ARHGAP42	11	100834500	AMOTL1_ARHGAP42 (Breakpoint)	-:11:94561500|+:11:100834500	33	0.12	0	PossibleLargeIndel	11:94561500
11	ARHGAP42	11	100834500	ARHGAP42 (Breakpoint)	-:11:94561500|+:11:100834500	33	0.12	0	PossibleLargeIndel	11:94561500
11	ARHGAP42_AMOTL1	11	100834500	ARHGAP42_AMOTL1 (Breakpoint)	-:11:94561500|+:11:100834500	33	0.12	0	PossibleLargeIndel	11:94561500
11	CNTN5	11	99561000	CNTN5 (Breakpoint)	-:11:81021000|+:11:99561000	39	0.1	0	PossibleLargeIndel	11:81021000
11	EXD3	9	140254500	EXD3 (Breakpoint)	-:9:140257500|+:9:140254500	29	0.22	0	PossibleLargeIndel	9:140257500
11	KDM4C	9	6843000	KDM4C (Breakpoint)	+:9:6843000|-:9:29067000	32	0.12	0	PossibleLargeIndel	9:29067000
12	ANKH	5	14821500	ANKH (Breakpoint)	-:5:14821500|-:5:10311000	31	0.13	0	PossibleInversion	5:10311000
12	ANKH	5	32037000	ANKH (Breakpoint)	+:5:32037000|-:5:14821500	30	0.12	0	PossibleLargeIndel	5:14821500
12	ANKH	5	21112500	ANKH (Breakpoint)	+:5:21112500|-:5:14821500	29	0.12	0	PossibleLargeIndel	5:14821500
12	ANKRD16	10	5925000	ANKRD16 (Breakpoint)	+:10:5925000|-:10:5935500	30	0.18	0	PossibleLargeIndel	10:5935500
12	ANKRD16_FBXO18	10	5925000	ANKRD16_FBXO18 (Breakpoint)	+:10:5925000|-:10:5935500	30	0.18	0	PossibleLargeIndel	10:5935500
12	BASP1	5	17110500	BASP1 (Breakpoint)	-:5:31666500|+:5:17110500	116	0.42	0	PossibleLargeIndel	5:31666500
12	BASP1	5	17112000	BASP1 (Breakpoint)	+:5:17112000|-:5:31669500	53	0.31	0	PossibleLargeIndel	5:31669500
12	BASP1_PDZD2	5	17110500	BASP1_PDZD2 (Breakpoint)	-:5:31666500|+:5:17110500	116	0.42	0	PossibleLargeIndel	5:31666500
12	BRD9	5	21270000	BRD9 (Breakpoint)	-:5:873000|+:5:21270000	103	0.27	0	PossibleLargeIndel	5:873000
12	BRD9	5	21271500	BRD9 (Breakpoint)	+:5:21271500|-:5:876000	84	0.19	0	PossibleLargeIndel	5:876000
12	BRD9	5	21343500	BRD9 (Breakpoint)	+:5:21343500|+:5:861000	37	0.17	0	PossibleInversion	5:861000
12	C5orf42	5	22338000	C5orf42 (Breakpoint)	+:5:22338000|-:5:37239000	94	0.15	0	PossibleLargeIndel	5:37239000
12	C5orf42	5	22341000	C5orf42 (Breakpoint)	-:5:37240500|+:5:22341000	86	0.21	0	PossibleLargeIndel	5:37240500
12	C5orf42_CDH12	5	22338000	C5orf42_CDH12 (Breakpoint)	+:5:22338000|-:5:37239000	94	0.15	0	PossibleLargeIndel	5:37239000
12	CDH12	5	29557500	CDH12 (Breakpoint)	-:5:22293000|+:5:29557500	127	0.35	0	PossibleLargeIndel	5:22293000
12	CDH12	5	22338000	CDH12 (Breakpoint)	+:5:22338000|-:5:37239000	94	0.15	0	PossibleLargeIndel	5:37239000
12	CDH12	5	22341000	CDH12 (Breakpoint)	-:5:37240500|+:5:22341000	86	0.21	0	PossibleLargeIndel	5:37240500
12	CDH12	5	29559000	CDH12 (Breakpoint)	+:5:29559000|-:5:22296000	79	0.2	0	PossibleLargeIndel	5:22296000
12	CDH12	5	21868500	CDH12 (Breakpoint)	-:5:21390000|+:5:21868500	98	0.23	0	PossibleLargeIndel	5:21390000
12	CDH12	5	33345000	CDH12 (Breakpoint)	+:5:33345000|+:5:22350000	23	0.1	0	PossibleInversion	5:22350000
12	CDH12	5	33388500	CDH12 (Breakpoint)	+:5:33388500|-:5:22350000	35	0.24	0	PossibleLargeIndel	5:22350000
12	CDH12_C5orf42	5	22338000	CDH12_C5orf42 (Breakpoint)	+:5:22338000|-:5:37239000	94	0.15	0	PossibleLargeIndel	5:37239000
12	CLPTM1L	5	1323000	CLPTM1L (Breakpoint)	+:5:1323000|-:5:14421000	268	0.4	0	PossibleLargeIndel	5:14421000
12	CLPTM1L	5	10309500	CLPTM1L (Breakpoint)	-:5:1320000|-:5:10309500	104	0.22	0	PossibleInversion	5:1320000
12	CLPTM1L	5	1318500	CLPTM1L (Breakpoint)	-:5:10309500|-:5:1318500	100	0.29	0	PossibleInversion	5:10309500
12	CLPTM1L	5	32046000	CLPTM1L (Breakpoint)	+:5:32046000|+:5:1324500	85	0.36	0	PossibleInversion	5:1324500
12	CLPTM1L	5	1318500	CLPTM1L (Breakpoint)	+:5:1318500|+:5:14458500	59	0.13	0	PossibleInversion	5:14458500
12	CLPTM1L	5	1324500	CLPTM1L (Breakpoint)	-:5:16974000|-:5:1324500	45	0.11	0	PossibleInversion	5:16974000
12	CLPTM1L	5	1326000	CLPTM1L (Breakpoint)	+:5:1326000|+:5:32047500	43	0.31	0	PossibleInversion	5:32047500
12	CLPTM1L	5	16972500	CLPTM1L (Breakpoint)	-:5:1324500|-:5:16972500	40	0.23	0	PossibleInversion	5:1324500
12	CLPTM1L	5	1324500	CLPTM1L (Breakpoint)	+:5:1324500|+:5:32044500	37	0.23	0	PossibleInversion	5:32044500
12	CLPTM1L_PDZD2	5	32046000	CLPTM1L_PDZD2 (Breakpoint)	+:5:32046000|+:5:1324500	85	0.36	0	PossibleInversion	5:1324500
12	CLPTM1L_PDZD2	5	1326000	CLPTM1L_PDZD2 (Breakpoint)	+:5:1326000|+:5:32047500	43	0.31	0	PossibleInversion	5:32047500
12	CLPTM1L_TRIO	5	1323000	CLPTM1L_TRIO (Breakpoint)	+:5:1323000|-:5:14421000	268	0.4	0	PossibleLargeIndel	5:14421000
12	DNAH5	5	13711500	DNAH5 (Breakpoint)	+:5:13711500|-:5:21112500	103	0.31	0	PossibleLargeIndel	5:21112500
12	DPYS	8	105471000	DPYS (Breakpoint)	+:8:105471000|-:8:105487500	30	0.12	0	PossibleLargeIndel	8:105487500
12	ENOX1	13	44338500	ENOX1 (Breakpoint)	+:13:44338500|-:2:157147500	29	0.1	0	Translocation	2:157147500
12	EPHA3	3	89376000	EPHA3 (Breakpoint)	+:3:89376000|-:3:89437500	28	0.15	0	PossibleLargeIndel	3:89437500
12	FBXL7	5	819000	FBXL7 (Breakpoint)	-:5:15642000|-:5:819000	64	0.18	0	PossibleInversion	5:15642000
12	FBXL7	5	15640500	FBXL7 (Breakpoint)	-:5:819000|-:5:15640500	41	0.2	0	PossibleInversion	5:819000
12	FBXL7	5	15673500	FBXL7 (Breakpoint)	+:5:15673500|-:5:21355500	28	0.12	0	PossibleLargeIndel	5:21355500
12	FBXL7_ZDHHC11	5	819000	FBXL7_ZDHHC11 (Breakpoint)	-:5:15642000|-:5:819000	64	0.18	0	PossibleInversion	5:15642000
12	FBXL7_ZDHHC11	5	15640500	FBXL7_ZDHHC11 (Breakpoint)	-:5:819000|-:5:15640500	41	0.2	0	PossibleInversion	5:819000
12	FBXO18	10	5925000	FBXO18 (Breakpoint)	+:10:5925000|-:10:5935500	30	0.18	0	PossibleLargeIndel	10:5935500
12	FBXO18_ANKRD16	10	5925000	FBXO18_ANKRD16 (Breakpoint)	+:10:5925000|-:10:5935500	30	0.18	0	PossibleLargeIndel	10:5935500
12	LPAR6	15	48403500	LPAR6 (Breakpoint)	+:15:48403500|+:13:48973500	55	0.14	0	Translocation	13:48973500
12	LPAR6	2	153630000	LPAR6 (Breakpoint)	-:13:48975000|-:2:153630000	51	0.11	0	Translocation	13:48975000
12	LPAR6	13	48973500	LPAR6 (Breakpoint)	-:2:153631500|-:13:48973500	50	0.12	0	Translocation	2:153631500
12	MYO10	5	37375500	MYO10 (Breakpoint)	+:5:37375500|-:5:16785000	118	0.18	0	PossibleLargeIndel	5:16785000
12	MYO10	5	37378500	MYO10 (Breakpoint)	-:5:16786500|+:5:37378500	87	0.18	0	PossibleLargeIndel	5:16786500
12	MYO10	5	32046000	MYO10 (Breakpoint)	-:5:32046000|-:5:16791000	74	0.36	0	PossibleTandemDup	5:16791000
12	MYO10	5	32047500	MYO10 (Breakpoint)	-:5:16792500|-:5:32047500	40	0.34	0	PossibleInversion	5:16792500
12	MYO10	5	10309500	MYO10 (Breakpoint)	+:5:10309500|+:5:16791000	38	0.29	0	PossibleInversion	5:16791000
12	MYO10	5	16791000	MYO10 (Breakpoint)	+:5:16791000|-:5:6429000	32	0.28	0	PossibleLargeIndel	5:6429000
12	MYO10	5	16791000	MYO10 (Breakpoint)	+:5:16791000|-:5:12468000	22	0.21	0	PossibleLargeIndel	5:12468000
12	MYO10_PDZD2	5	32046000	MYO10_PDZD2 (Breakpoint)	-:5:32046000|-:5:16791000	74	0.36	0	PossibleTandemDup	5:16791000
12	NIM1K	5	21475500	NIM1K (Breakpoint)	+:5:21475500|+:5:43213500	64	0.38	0	PossibleInversion	5:43213500
12	NIM1K	5	43212000	NIM1K (Breakpoint)	+:5:43212000|+:5:21474000	56	0.22	0	PossibleInversion	5:21474000
12	PDZD2	5	17110500	PDZD2 (Breakpoint)	-:5:31666500|+:5:17110500	116	0.42	0	PossibleLargeIndel	5:31666500
12	PDZD2	5	32046000	PDZD2 (Breakpoint)	+:5:32046000|+:5:1324500	85	0.36	0	PossibleInversion	5:1324500
12	PDZD2	5	32022000	PDZD2 (Breakpoint)	-:5:32044500|+:5:32022000	149	0.59	0	PossibleLargeIndel	5:32044500
12	PDZD2	5	17112000	PDZD2 (Breakpoint)	+:5:17112000|-:5:31669500	53	0.31	0	PossibleLargeIndel	5:31669500
12	PDZD2	5	32046000	PDZD2 (Breakpoint)	-:5:32046000|-:5:16791000	74	0.36	0	PossibleTandemDup	5:16791000
12	PDZD2	5	1326000	PDZD2 (Breakpoint)	+:5:1326000|+:5:32047500	43	0.31	0	PossibleInversion	5:32047500
12	PDZD2	5	32047500	PDZD2 (Breakpoint)	-:5:16792500|-:5:32047500	40	0.34	0	PossibleInversion	5:16792500
12	PDZD2	5	1324500	PDZD2 (Breakpoint)	+:5:1324500|+:5:32044500	37	0.23	0	PossibleInversion	5:32044500
12	PDZD2	5	31668000	PDZD2 (Breakpoint)	+:5:31668000|+:5:30763500	37	0.13	0	PossibleInversion	5:30763500
12	PDZD2	5	10311000	PDZD2 (Breakpoint)	+:5:10311000|+:5:32046000	35	0.22	0	PossibleInversion	5:32046000
12	PDZD2	5	32046000	PDZD2 (Breakpoint)	+:5:32046000|+:5:10309500	24	0.15	0	PossibleInversion	5:10309500
12	PDZD2	5	10311000	PDZD2 (Breakpoint)	+:5:10311000|-:5:32044500	33	0.25	0	PossibleLargeIndel	5:32044500
12	PDZD2	5	1099500	PDZD2 (Breakpoint)	+:5:1099500|+:5:31671000	22	0.25	0	PossibleInversion	5:31671000
12	PDZD2	5	32037000	PDZD2 (Breakpoint)	+:5:32037000|-:5:14821500	30	0.12	0	PossibleLargeIndel	5:14821500
12	PDZD2_BASP1	5	17110500	PDZD2_BASP1 (Breakpoint)	-:5:31666500|+:5:17110500	116	0.42	0	PossibleLargeIndel	5:31666500
12	PDZD2_CLPTM1L	5	32046000	PDZD2_CLPTM1L (Breakpoint)	+:5:32046000|+:5:1324500	85	0.36	0	PossibleInversion	5:1324500
12	PDZD2_CLPTM1L	5	1326000	PDZD2_CLPTM1L (Breakpoint)	+:5:1326000|+:5:32047500	43	0.31	0	PossibleInversion	5:32047500
12	PDZD2_MYO10	5	32046000	PDZD2_MYO10 (Breakpoint)	-:5:32046000|-:5:16791000	74	0.36	0	PossibleTandemDup	5:16791000
12	RB1	15	48403500	RB1 (Breakpoint)	+:15:48403500|+:13:48973500	55	0.14	0	Translocation	13:48973500
12	RB1	2	153630000	RB1 (Breakpoint)	-:13:48975000|-:2:153630000	51	0.11	0	Translocation	13:48975000
12	RB1	13	48973500	RB1 (Breakpoint)	-:2:153631500|-:13:48973500	50	0.12	0	Translocation	2:153631500
12	SEMA6D	15	47647500	SEMA6D (Breakpoint)	-:2:154213500|-:15:47647500	63	0.19	0	Translocation	2:154213500
12	SEMA6D	2	154215000	SEMA6D (Breakpoint)	-:15:47649000|-:2:154215000	52	0.15	0	Translocation	15:47649000
12	SLC12A7	5	1098000	SLC12A7 (Breakpoint)	+:5:1098000|-:5:30763500	27	0.18	0	PossibleLargeIndel	5:30763500
12	SLC12A7	5	1099500	SLC12A7 (Breakpoint)	+:5:1099500|+:5:31671000	22	0.25	0	PossibleInversion	5:31671000
12	TERT	5	1288500	TERT (Breakpoint)	-:5:36583500|-:5:1288500	28	0.04	0	PossibleInversion	5:36583500
12	TMEM65	8	47521500	TMEM65 (Breakpoint)	-:8:125380500|+:8:47521500	96	0.26	0	PossibleLargeIndel	8:125380500
12	TMEM65	8	47523000	TMEM65 (Breakpoint)	+:8:47523000|-:8:125383500	30	0.1	0	PossibleLargeIndel	8:125383500
12	TRIO	5	1323000	TRIO (Breakpoint)	+:5:1323000|-:5:14421000	268	0.4	0	PossibleLargeIndel	5:14421000
12	TRIO	5	1318500	TRIO (Breakpoint)	+:5:1318500|+:5:14458500	59	0.13	0	PossibleInversion	5:14458500
12	TRIO_CLPTM1L	5	1323000	TRIO_CLPTM1L (Breakpoint)	+:5:1323000|-:5:14421000	268	0.4	0	PossibleLargeIndel	5:14421000
12	ZBBX	3	166984500	ZBBX (Breakpoint)	-:3:167010000|+:3:166984500	29	0.19	0	PossibleLargeIndel	3:167010000
12	ZDHHC11	5	819000	ZDHHC11 (Breakpoint)	-:5:15642000|-:5:819000	64	0.18	0	PossibleInversion	5:15642000
12	ZDHHC11	5	15640500	ZDHHC11 (Breakpoint)	-:5:819000|-:5:15640500	41	0.2	0	PossibleInversion	5:819000
12	ZDHHC11_FBXL7	5	819000	ZDHHC11_FBXL7 (Breakpoint)	-:5:15642000|-:5:819000	64	0.18	0	PossibleInversion	5:15642000
12	ZDHHC11_FBXL7	5	15640500	ZDHHC11_FBXL7 (Breakpoint)	-:5:819000|-:5:15640500	41	0.2	0	PossibleInversion	5:819000
13	APH1B	15	63576000	APH1B (Breakpoint)	-:15:27315000|+:15:63576000	62	0.16	0	PossibleLargeIndel	15:27315000
13	APH1B_GABRG3	15	63576000	APH1B_GABRG3 (Breakpoint)	-:15:27315000|+:15:63576000	62	0.16	0	PossibleLargeIndel	15:27315000
13	CA12	15	63621000	CA12 (Breakpoint)	-:15:63925500|+:15:63621000	45	0.14	0	PossibleLargeIndel	15:63925500
13	CA12_HERC1	15	63621000	CA12_HERC1 (Breakpoint)	-:15:63925500|+:15:63621000	45	0.14	0	PossibleLargeIndel	15:63925500
13	CSRNP3	2	166395000	CSRNP3 (Breakpoint)	+:2:166395000|+:2:189543000	60	0.16	0	PossibleInversion	2:189543000
13	CSRNP3	2	166395000	CSRNP3 (Breakpoint)	+:2:166395000|-:2:189540000	52	0.13	0	PossibleLargeIndel	2:189540000
13	FAM219A	9	34432500	FAM219A (Breakpoint)	-:5:18280500|+:9:34432500	26	0.11	0	Translocation	5:18280500
13	GABRB3	15	26971500	GABRB3 (Breakpoint)	-:15:85260000|+:15:26971500	30	0.12	0	PossibleLargeIndel	15:85260000
13	GABRB3	15	26968500	GABRB3 (Breakpoint)	+:15:26968500|-:15:85258500	29	0.1	0	PossibleLargeIndel	15:85258500
13	GABRB3_SEC11A	15	26971500	GABRB3_SEC11A (Breakpoint)	-:15:85260000|+:15:26971500	30	0.12	0	PossibleLargeIndel	15:85260000
13	GABRG3	15	27546000	GABRG3 (Breakpoint)	+:15:27546000|+:15:94969500	33	0.13	0	PossibleInversion	15:94969500
13	GABRG3	15	63576000	GABRG3 (Breakpoint)	-:15:27315000|+:15:63576000	62	0.16	0	PossibleLargeIndel	15:27315000
13	GABRG3	15	94971000	GABRG3 (Breakpoint)	+:15:94971000|+:15:27547500	20	0.1	0	PossibleInversion	15:27547500
13	GABRG3_APH1B	15	63576000	GABRG3_APH1B (Breakpoint)	-:15:27315000|+:15:63576000	62	0.16	0	PossibleLargeIndel	15:27315000
13	GABRG3_MCTP2	15	27546000	GABRG3_MCTP2 (Breakpoint)	+:15:27546000|+:15:94969500	33	0.13	0	PossibleInversion	15:94969500
13	GABRG3_MCTP2	15	94971000	GABRG3_MCTP2 (Breakpoint)	+:15:94971000|+:15:27547500	20	0.1	0	PossibleInversion	15:27547500
13	HERC1	15	63955500	HERC1 (Breakpoint)	+:15:63955500|-:15:62989500	63	0.2	0	PossibleLargeIndel	15:62989500
13	HERC1	15	63621000	HERC1 (Breakpoint)	-:15:63925500|+:15:63621000	45	0.14	0	PossibleLargeIndel	15:63925500
13	HERC1	15	27816000	HERC1 (Breakpoint)	-:15:63960000|+:15:27816000	30	0.11	0	PossibleLargeIndel	15:63960000
13	HERC1_CA12	15	63621000	HERC1_CA12 (Breakpoint)	-:15:63925500|+:15:63621000	45	0.14	0	PossibleLargeIndel	15:63925500
13	HERC1_TLN2	15	63955500	HERC1_TLN2 (Breakpoint)	+:15:63955500|-:15:62989500	63	0.2	0	PossibleLargeIndel	15:62989500
13	MCTP2	15	27546000	MCTP2 (Breakpoint)	+:15:27546000|+:15:94969500	33	0.13	0	PossibleInversion	15:94969500
13	MCTP2	15	94971000	MCTP2 (Breakpoint)	+:15:94971000|+:15:27547500	20	0.1	0	PossibleInversion	15:27547500
13	MCTP2_GABRG3	15	27546000	MCTP2_GABRG3 (Breakpoint)	+:15:27546000|+:15:94969500	33	0.13	0	PossibleInversion	15:94969500
13	MCTP2_GABRG3	15	94971000	MCTP2_GABRG3 (Breakpoint)	+:15:94971000|+:15:27547500	20	0.1	0	PossibleInversion	15:27547500
13	SEC11A	15	26971500	SEC11A (Breakpoint)	-:15:85260000|+:15:26971500	30	0.12	0	PossibleLargeIndel	15:85260000
13	SEC11A	15	26968500	SEC11A (Breakpoint)	+:15:26968500|-:15:85258500	29	0.1	0	PossibleLargeIndel	15:85258500
13	SEC11A_GABRB3	15	26971500	SEC11A_GABRB3 (Breakpoint)	-:15:85260000|+:15:26971500	30	0.12	0	PossibleLargeIndel	15:85260000
13	TLN2	15	63955500	TLN2 (Breakpoint)	+:15:63955500|-:15:62989500	63	0.2	0	PossibleLargeIndel	15:62989500
13	TLN2_HERC1	15	63955500	TLN2_HERC1 (Breakpoint)	+:15:63955500|-:15:62989500	63	0.2	0	PossibleLargeIndel	15:62989500
14	ACACB	12	109659000	ACACB (Breakpoint)	+:12:109659000|+:12:124396500	68	0.29	0	PossibleInversion	12:124396500
14	ACACB	12	124398000	ACACB (Breakpoint)	+:12:124398000|+:12:109657500	64	0.19	0	PossibleInversion	12:109657500
14	ACACB_DNAH10	12	109659000	ACACB_DNAH10 (Breakpoint)	+:12:109659000|+:12:124396500	68	0.29	0	PossibleInversion	12:124396500
14	ACACB_DNAH10	12	124398000	ACACB_DNAH10 (Breakpoint)	+:12:124398000|+:12:109657500	64	0.19	0	PossibleInversion	12:109657500
14	ACAD10	12	123318000	ACAD10 (Breakpoint)	+:12:123318000|-:12:112159500	60	0.1	0	PossibleLargeIndel	12:112159500
14	ACSS3	12	81456000	ACSS3 (Breakpoint)	+:12:81456000|-:12:129307500	266	0.35	0	PossibleLargeIndel	12:129307500
14	ACSS3	12	81454500	ACSS3 (Breakpoint)	-:12:129304500|+:12:81454500	307	0.36	0	PossibleLargeIndel	12:129304500
14	ACSS3_SLC15A4	12	81456000	ACSS3_SLC15A4 (Breakpoint)	+:12:81456000|-:12:129307500	266	0.35	0	PossibleLargeIndel	12:129307500
14	AGAP2	12	72340500	AGAP2 (Breakpoint)	-:12:58135500|-:12:72340500	207	0.12	0	PossibleInversion	12:58135500
14	ALX1	20	51268500	ALX1 (Breakpoint)	-:12:85692000|+:20:51268500	241	0.17	0	Translocation	12:85692000
14	ALX1	20	51270000	ALX1 (Breakpoint)	+:20:51270000|-:12:85695000	144	0.1	0	Translocation	12:85695000
14	ANAPC5	12	121815000	ANAPC5 (Breakpoint)	+:12:121815000|+:12:118806000	77	0.3	0	PossibleInversion	12:118806000
14	ANAPC5	12	115644000	ANAPC5 (Breakpoint)	-:12:121813500|+:12:115644000	127	0.27	0	PossibleLargeIndel	12:121813500
14	ANAPC5	12	118807500	ANAPC5 (Breakpoint)	+:12:118807500|+:12:121816500	43	0.27	0	PossibleInversion	12:121816500
14	ANAPC5	12	118806000	ANAPC5 (Breakpoint)	+:12:118806000|+:12:121813500	36	0.16	0	PossibleInversion	12:121813500
14	ANAPC5_TAOK3	12	121815000	ANAPC5_TAOK3 (Breakpoint)	+:12:121815000|+:12:118806000	77	0.3	0	PossibleInversion	12:118806000
14	ANAPC5_TAOK3	12	118807500	ANAPC5_TAOK3 (Breakpoint)	+:12:118807500|+:12:121816500	43	0.27	0	PossibleInversion	12:121816500
14	ATP5B	12	57036000	ATP5B (Breakpoint)	+:12:57036000|-:12:87262500	517	0.48	0	PossibleLargeIndel	12:87262500
14	ATP5B	12	70288500	ATP5B (Breakpoint)	-:12:57034500|+:12:70288500	249	0.36	0	PossibleLargeIndel	12:57034500
14	ATP5B	12	70290000	ATP5B (Breakpoint)	+:12:70290000|-:12:57037500	42	0.14	0	PossibleLargeIndel	12:57037500
14	ATP5B_MYRFL	12	70288500	ATP5B_MYRFL (Breakpoint)	-:12:57034500|+:12:70288500	249	0.36	0	PossibleLargeIndel	12:57034500
14	ATP9A	20	50340000	ATP9A (Breakpoint)	-:20:50739000|+:20:50340000	890	0.18	0	PossibleLargeIndel	20:50739000
14	ATP9A	12	66549000	ATP9A (Breakpoint)	-:20:50373000|-:12:66549000	404	0.12	0	Translocation	20:50373000
14	ATP9A	20	50371500	ATP9A (Breakpoint)	-:12:66549000|-:20:50371500	257	0.1	0	Translocation	12:66549000
14	ATP9A_TMBIM4	12	66549000	ATP9A_TMBIM4 (Breakpoint)	-:20:50373000|-:12:66549000	404	0.12	0	Translocation	20:50373000
14	ATP9A_TMBIM4	20	50371500	ATP9A_TMBIM4 (Breakpoint)	-:12:66549000|-:20:50371500	257	0.1	0	Translocation	12:66549000
14	ATP9A_ZFP64	20	50340000	ATP9A_ZFP64 (Breakpoint)	-:20:50739000|+:20:50340000	890	0.18	0	PossibleLargeIndel	20:50739000
14	ATXN2	12	112029000	ATXN2 (Breakpoint)	-:12:112029000|-:12:122028000	175	0.25	0	PossibleInversion	12:122028000
14	ATXN2	12	111913500	ATXN2 (Breakpoint)	-:5:38701500|-:12:111913500	78	0.19	0	Translocation	5:38701500
14	ATXN2	12	111927000	ATXN2 (Breakpoint)	+:12:111927000|+:12:119854500	75	0.38	0	PossibleInversion	12:119854500
14	ATXN2	12	119854500	ATXN2 (Breakpoint)	+:12:119854500|+:12:111925500	70	0.18	0	PossibleInversion	12:111925500
14	ATXN2	5	38700000	ATXN2 (Breakpoint)	-:12:111915000|-:5:38700000	59	0.17	0	Translocation	12:111915000
14	ATXN2	12	111927000	ATXN2 (Breakpoint)	+:12:111927000|+:12:74358000	38	0.16	0	PossibleInversion	12:74358000
14	ATXN2	12	111976500	ATXN2 (Breakpoint)	+:12:111976500|-:12:109828500	22	0.1	0	PossibleLargeIndel	12:109828500
14	ATXN2_CCDC60	12	111927000	ATXN2_CCDC60 (Breakpoint)	+:12:111927000|+:12:119854500	75	0.38	0	PossibleInversion	12:119854500
14	ATXN2_CCDC60	12	119854500	ATXN2_CCDC60 (Breakpoint)	+:12:119854500|+:12:111925500	70	0.18	0	PossibleInversion	12:111925500
14	BASP1	5	32185500	BASP1 (Breakpoint)	-:5:17170500|+:5:32185500	158	0.1	0	PossibleLargeIndel	5:17170500
14	BAZ2A	12	58285500	BAZ2A (Breakpoint)	+:12:58285500|+:12:57019500	233	0.28	0	PossibleInversion	12:57019500
14	BAZ2A	12	64600500	BAZ2A (Breakpoint)	+:12:64600500|-:12:57009000	254	0.25	0	PossibleLargeIndel	12:57009000
14	BAZ2A	12	57021000	BAZ2A (Breakpoint)	+:12:57021000|+:12:58287000	124	0.22	0	PossibleInversion	12:58287000
14	BAZ2A	12	67480500	BAZ2A (Breakpoint)	+:12:67480500|-:12:57009000	159	0.2	0	PossibleLargeIndel	12:57009000
14	BAZ2A	12	57019500	BAZ2A (Breakpoint)	+:12:57019500|+:12:58284000	108	0.1	0	PossibleInversion	12:58284000
14	BAZ2A	12	57022500	BAZ2A (Breakpoint)	+:12:57022500|-:12:71194500	51	0.1	0	PossibleLargeIndel	12:71194500
14	BAZ2A_C12orf66	12	64600500	BAZ2A_C12orf66 (Breakpoint)	+:12:64600500|-:12:57009000	254	0.25	0	PossibleLargeIndel	12:57009000
14	BAZ2A_PTPRR	12	57022500	BAZ2A_PTPRR (Breakpoint)	+:12:57022500|-:12:71194500	51	0.1	0	PossibleLargeIndel	12:71194500
14	BRI3BP	12	125502000	BRI3BP (Breakpoint)	+:12:125502000|+:5:18144000	736	0.45	0	Translocation	5:18144000
14	BRI3BP	5	18145500	BRI3BP (Breakpoint)	+:5:18145500|+:12:125503500	676	0.9	0	Translocation	12:125503500
14	C12orf29	12	88429500	C12orf29 (Breakpoint)	-:12:95721000|-:12:88429500	164	0.31	0	PossibleInversion	12:95721000
14	C12orf29	12	95719500	C12orf29 (Breakpoint)	-:12:88431000|-:12:95719500	153	0.26	0	PossibleInversion	12:88431000
14	C12orf29	5	496500	C12orf29 (Breakpoint)	+:5:496500|+:12:88435500	107	0.3	0	Translocation	12:88435500
14	C12orf29	12	88435500	C12orf29 (Breakpoint)	+:12:88435500|+:5:495000	66	0.19	0	Translocation	5:495000
14	C12orf29	12	88437000	C12orf29 (Breakpoint)	+:12:88437000|+:5:498000	26	0.22	0	Translocation	5:498000
14	C12orf29_SLC9A3	5	496500	C12orf29_SLC9A3 (Breakpoint)	+:5:496500|+:12:88435500	107	0.3	0	Translocation	12:88435500
14	C12orf29_SLC9A3	12	88435500	C12orf29_SLC9A3 (Breakpoint)	+:12:88435500|+:5:495000	66	0.19	0	Translocation	5:495000
14	C12orf43	12	87486000	C12orf43 (Breakpoint)	-:12:121441500|+:12:87486000	458	0.38	0	PossibleLargeIndel	12:121441500
14	C12orf43	12	87486000	C12orf43 (Breakpoint)	+:12:87486000|-:12:121452000	108	0.12	0	PossibleLargeIndel	12:121452000
14	C12orf50	12	88417500	C12orf50 (Breakpoint)	-:12:116158500|+:12:88417500	159	0.15	0	PossibleLargeIndel	12:116158500
14	C12orf50	12	88423500	C12orf50 (Breakpoint)	+:12:88423500|+:12:86109000	49	0.17	0	PossibleInversion	12:86109000
14	C12orf56	12	114046500	C12orf56 (Breakpoint)	-:12:64755000|+:12:114046500	556	0.34	0	PossibleLargeIndel	12:64755000
14	C12orf56	12	114048000	C12orf56 (Breakpoint)	+:12:114048000|-:12:64758000	130	0.12	0	PossibleLargeIndel	12:64758000
14	C12orf56	12	58287000	C12orf56 (Breakpoint)	-:12:64687500|+:12:58287000	161	0.32	0	PossibleLargeIndel	12:64687500
14	C12orf56	12	58296000	C12orf56 (Breakpoint)	-:12:58296000|-:12:64701000	77	0.12	0	PossibleInversion	12:64701000
14	C12orf56	12	72681000	C12orf56 (Breakpoint)	+:12:72681000|+:12:64701000	81	0.16	0	PossibleInversion	12:64701000
14	C12orf56	12	64689000	C12orf56 (Breakpoint)	-:12:69069000|+:12:64689000	118	0.24	0	PossibleLargeIndel	12:69069000
14	C12orf56	12	64702500	C12orf56 (Breakpoint)	+:12:64702500|+:12:72682500	58	0.2	0	PossibleInversion	12:72682500
14	C12orf56	12	58288500	C12orf56 (Breakpoint)	+:12:58288500|-:12:64690500	50	0.24	0	PossibleLargeIndel	12:64690500
14	C12orf56_TRHDE	12	72681000	C12orf56_TRHDE (Breakpoint)	+:12:72681000|+:12:64701000	81	0.16	0	PossibleInversion	12:64701000
14	C12orf56_TRHDE	12	64702500	C12orf56_TRHDE (Breakpoint)	+:12:64702500|+:12:72682500	58	0.2	0	PossibleInversion	12:72682500
14	C12orf66	12	64600500	C12orf66 (Breakpoint)	+:12:64600500|-:12:57009000	254	0.25	0	PossibleLargeIndel	12:57009000
14	C12orf66_BAZ2A	12	64600500	C12orf66_BAZ2A (Breakpoint)	+:12:64600500|-:12:57009000	254	0.25	0	PossibleLargeIndel	12:57009000
14	C5orf51	20	48105000	C5orf51 (Breakpoint)	+:20:48105000|-:5:41917500	512	0.45	0	Translocation	5:41917500
14	CAMKK2	12	121710000	CAMKK2 (Breakpoint)	-:12:61390500|+:12:121710000	142	0.16	0	PossibleLargeIndel	12:61390500
14	CAND1	12	64219500	CAND1 (Breakpoint)	-:12:67699500|+:12:64219500	178	0.11	0	PossibleLargeIndel	12:67699500
14	CAND1	12	64221000	CAND1 (Breakpoint)	+:12:64221000|-:12:67702500	154	0.1	0	PossibleLargeIndel	12:67702500
14	CCDC60	12	111927000	CCDC60 (Breakpoint)	+:12:111927000|+:12:119854500	75	0.38	0	PossibleInversion	12:119854500
14	CCDC60	12	74358000	CCDC60 (Breakpoint)	+:12:74358000|-:12:119854500	146	0.41	0	PossibleLargeIndel	12:119854500
14	CCDC60	12	119854500	CCDC60 (Breakpoint)	+:12:119854500|+:12:111925500	70	0.18	0	PossibleInversion	12:111925500
14	CCDC60	12	118959000	CCDC60 (Breakpoint)	+:12:118959000|+:12:119853000	64	0.23	0	PossibleInversion	12:119853000
14	CCDC60	12	119854500	CCDC60 (Breakpoint)	+:12:119854500|+:12:118960500	59	0.32	0	PossibleInversion	12:118960500
14	CCDC60_ATXN2	12	111927000	CCDC60_ATXN2 (Breakpoint)	+:12:111927000|+:12:119854500	75	0.38	0	PossibleInversion	12:119854500
14	CCDC60_ATXN2	12	119854500	CCDC60_ATXN2 (Breakpoint)	+:12:119854500|+:12:111925500	70	0.18	0	PossibleInversion	12:111925500
14	CCDC62	5	34984500	CCDC62 (Breakpoint)	-:5:34984500|-:12:123307500	60	0.18	0	Translocation	12:123307500
14	CCDC62	12	123307500	CCDC62 (Breakpoint)	+:12:123307500|+:5:34983000	43	0.2	0	Translocation	5:34983000
14	CCDC62	5	34984500	CCDC62 (Breakpoint)	+:5:34984500|+:12:123309000	36	0.11	0	Translocation	12:123309000
14	CCDC63	12	57493500	CCDC63 (Breakpoint)	-:12:111301500|-:12:57493500	288	0.17	0	PossibleInversion	12:111301500
14	CCDC63	12	111300000	CCDC63 (Breakpoint)	-:12:57493500|-:12:111300000	273	0.28	0	PossibleInversion	12:57493500
14	CCDC63	12	93642000	CCDC63 (Breakpoint)	+:12:93642000|-:12:111342000	135	0.19	0	PossibleLargeIndel	12:111342000
14	CCDC63	12	111342000	CCDC63 (Breakpoint)	+:12:111342000|-:12:90556500	207	0.22	0	PossibleLargeIndel	12:90556500
14	CCDC63	12	93643500	CCDC63 (Breakpoint)	-:12:111343500|+:12:93643500	98	0.25	0	PossibleLargeIndel	12:111343500
14	CCDC63_STAT6	12	57493500	CCDC63_STAT6 (Breakpoint)	-:12:111301500|-:12:57493500	288	0.17	0	PossibleInversion	12:111301500
14	CCDC63_STAT6	12	111300000	CCDC63_STAT6 (Breakpoint)	-:12:57493500|-:12:111300000	273	0.28	0	PossibleInversion	12:57493500
14	CCDC92	5	34969500	CCDC92 (Breakpoint)	-:12:124434000|+:5:34969500	29	0.2	0	Translocation	12:124434000
14	CCT2	12	69990000	CCT2 (Breakpoint)	+:12:69990000|-:12:87309000	391	0.2	0	PossibleLargeIndel	12:87309000
14	CCT2	12	64869000	CCT2 (Breakpoint)	-:12:69991500|+:12:64869000	460	0.22	0	PossibleLargeIndel	12:69991500
14	CCT2	12	69993000	CCT2 (Breakpoint)	-:12:87310500|+:12:69993000	230	0.15	0	PossibleLargeIndel	12:87310500
14	CCT2_TBK1	12	64869000	CCT2_TBK1 (Breakpoint)	-:12:69991500|+:12:64869000	460	0.22	0	PossibleLargeIndel	12:69991500
14	CHFR	12	133402500	CHFR (Breakpoint)	-:12:109954500|-:12:133402500	69	0.18	0	PossibleInversion	12:109954500
14	CHFR	12	109956000	CHFR (Breakpoint)	-:12:133404000|-:12:109956000	64	0.15	0	PossibleInversion	12:133404000
14	CIT	5	35775000	CIT (Breakpoint)	+:5:35775000|+:12:120294000	81	0.21	0	Translocation	12:120294000
14	CIT	12	61474500	CIT (Breakpoint)	-:12:120220500|+:12:61474500	117	0.18	0	PossibleLargeIndel	12:120220500
14	CIT	12	120186000	CIT (Breakpoint)	-:12:121126500|+:12:120186000	29	0.15	0	PossibleLargeIndel	12:121126500
14	CIT	12	120304500	CIT (Breakpoint)	+:12:120304500|-:12:74275500	20	0.11	0	PossibleLargeIndel	12:74275500
14	CIT_MLEC	12	120186000	CIT_MLEC (Breakpoint)	-:12:121126500|+:12:120186000	29	0.15	0	PossibleLargeIndel	12:121126500
14	CIT_SPEF2	5	35775000	CIT_SPEF2 (Breakpoint)	+:5:35775000|+:12:120294000	81	0.21	0	Translocation	12:120294000
14	CLPTM1L	5	1338000	CLPTM1L (Breakpoint)	+:5:1338000|+:5:18766500	214	0.61	0	PossibleInversion	5:18766500
14	CLPTM1L	5	1332000	CLPTM1L (Breakpoint)	-:5:1671000|-:5:1332000	143	0.27	0	PossibleInversion	5:1671000
14	CLPTM1L	5	34752000	CLPTM1L (Breakpoint)	+:5:34752000|-:5:1338000	170	0.56	0	PossibleLargeIndel	5:1338000
14	CLPTM1L	5	1669500	CLPTM1L (Breakpoint)	-:5:1332000|-:5:1669500	108	0.39	0	PossibleInversion	5:1332000
14	CLPTM1L	5	34755000	CLPTM1L (Breakpoint)	-:5:1339500|+:5:34755000	98	0.52	0	PossibleLargeIndel	5:1339500
14	CLPTM1L	5	31827000	CLPTM1L (Breakpoint)	+:5:31827000|+:5:1332000	88	0.36	0	PossibleInversion	5:1332000
14	CLPTM1L	5	1672500	CLPTM1L (Breakpoint)	-:5:1333500|-:5:1672500	35	0.12	0	PossibleInversion	5:1333500
14	CLPTM1L_PDZD2	5	31827000	CLPTM1L_PDZD2 (Breakpoint)	+:5:31827000|+:5:1332000	88	0.36	0	PossibleInversion	5:1332000
14	CLPTM1L_RAI14	5	34752000	CLPTM1L_RAI14 (Breakpoint)	+:5:34752000|-:5:1338000	170	0.56	0	PossibleLargeIndel	5:1338000
14	CPM	5	40521000	CPM (Breakpoint)	-:5:40521000|-:12:69276000	339	0.17	0	Translocation	12:69276000
14	CPM	5	40453500	CPM (Breakpoint)	+:5:40453500|+:12:69354000	336	0.25	0	Translocation	12:69354000
14	CPM	12	69354000	CPM (Breakpoint)	+:12:69354000|+:5:40452000	185	0.11	0	Translocation	5:40452000
14	CPM	12	69355500	CPM (Breakpoint)	+:12:69355500|+:5:40455000	142	0.16	0	Translocation	5:40455000
14	CRMP1	4	22162500	CRMP1 (Breakpoint)	+:4:22162500|-:4:5851500	75	0.18	0	PossibleLargeIndel	4:5851500
14	CRMP1	4	5880000	CRMP1 (Breakpoint)	-:4:5911500|+:4:5880000	37	0.13	0	PossibleLargeIndel	4:5911500
14	CTDSP2	12	58234500	CTDSP2 (Breakpoint)	-:12:64224000|+:12:58234500	321	0.12	0	PossibleLargeIndel	12:64224000
14	CUX2	12	111681000	CUX2 (Breakpoint)	+:12:111681000|+:12:63832500	27	0.1	0	PossibleInversion	12:63832500
14	CWH43	4	47421000	CWH43 (Breakpoint)	-:4:49057500|+:4:47421000	94	0.25	0	PossibleLargeIndel	4:49057500
14	CWH43_GABRB1	4	47421000	CWH43_GABRB1 (Breakpoint)	-:4:49057500|+:4:47421000	94	0.25	0	PossibleLargeIndel	4:49057500
14	DAO	12	109279500	DAO (Breakpoint)	-:20:48670500|+:12:109279500	1148	0.3	0	Translocation	20:48670500
14	DNAH10	12	109659000	DNAH10 (Breakpoint)	+:12:109659000|+:12:124396500	68	0.29	0	PossibleInversion	12:124396500
14	DNAH10	12	124398000	DNAH10 (Breakpoint)	+:12:124398000|+:12:109657500	64	0.19	0	PossibleInversion	12:109657500
14	DNAH10	12	112887000	DNAH10 (Breakpoint)	+:12:112887000|-:12:124291500	70	0.19	0	PossibleLargeIndel	12:124291500
14	DNAH10	12	124291500	DNAH10 (Breakpoint)	-:5:35374500|+:12:124291500	30	0.21	0	Translocation	5:35374500
14	DNAH10_ACACB	12	109659000	DNAH10_ACACB (Breakpoint)	+:12:109659000|+:12:124396500	68	0.29	0	PossibleInversion	12:124396500
14	DNAH10_ACACB	12	124398000	DNAH10_ACACB (Breakpoint)	+:12:124398000|+:12:109657500	64	0.19	0	PossibleInversion	12:109657500
14	DNAH10_PTPN11	12	112887000	DNAH10_PTPN11 (Breakpoint)	+:12:112887000|-:12:124291500	70	0.19	0	PossibleLargeIndel	12:124291500
14	DPY19L2	5	32010000	DPY19L2 (Breakpoint)	-:12:64048500|+:5:32010000	115	0.18	0	Translocation	12:64048500
14	DPY19L2_PDZD2	5	32010000	DPY19L2_PDZD2 (Breakpoint)	-:12:64048500|+:5:32010000	115	0.18	0	Translocation	12:64048500
14	EGFLAM	5	38296500	EGFLAM (Breakpoint)	+:5:38296500|-:5:39786000	330	0.26	0	PossibleLargeIndel	5:39786000
14	EGFLAM	5	38299500	EGFLAM (Breakpoint)	-:5:39787500|+:5:38299500	282	0.39	0	PossibleLargeIndel	5:39787500
14	EGFLAM	5	38292000	EGFLAM (Breakpoint)	-:12:128880000|-:5:38292000	178	0.12	0	Translocation	12:128880000
14	EGFLAM_TMEM132C	5	38292000	EGFLAM_TMEM132C (Breakpoint)	-:12:128880000|-:5:38292000	178	0.12	0	Translocation	12:128880000
14	EP400NL	12	129954000	EP400NL (Breakpoint)	-:12:132606000|+:12:129954000	456	0.35	0	PossibleLargeIndel	12:132606000
14	EP400NL	5	1996500	EP400NL (Breakpoint)	+:5:1996500|+:12:132607500	263	0.31	0	Translocation	12:132607500
14	EP400NL	12	129973500	EP400NL (Breakpoint)	-:12:132585000|-:12:129973500	254	0.23	0	PossibleInversion	12:132585000
14	EP400NL	12	132588000	EP400NL (Breakpoint)	+:12:132588000|-:12:129927000	385	0.43	0	PossibleLargeIndel	12:129927000
14	EP400NL	12	132586500	EP400NL (Breakpoint)	-:12:129975000|-:12:132586500	190	0.2	0	PossibleInversion	12:129975000
14	EP400NL	12	129955500	EP400NL (Breakpoint)	+:12:129955500|-:12:132609000	179	0.18	0	PossibleLargeIndel	12:132609000
14	EP400NL	5	31788000	EP400NL (Breakpoint)	-:5:31788000|-:12:132601500	166	0.12	0	Translocation	12:132601500
14	EP400NL	12	132598500	EP400NL (Breakpoint)	-:5:31786500|-:12:132598500	108	0.16	0	Translocation	5:31786500
14	EP400NL	5	31785000	EP400NL (Breakpoint)	-:12:132600000|-:5:31785000	108	0.16	0	Translocation	12:132600000
14	EP400NL	12	132583500	EP400NL (Breakpoint)	-:12:129973500|-:12:132583500	58	0.11	0	PossibleInversion	12:129973500
14	EP400NL_PDZD2	5	31788000	EP400NL_PDZD2 (Breakpoint)	-:5:31788000|-:12:132601500	166	0.12	0	Translocation	12:132601500
14	EP400NL_PDZD2	12	132598500	EP400NL_PDZD2 (Breakpoint)	-:5:31786500|-:12:132598500	108	0.16	0	Translocation	5:31786500
14	EP400NL_TMEM132D	12	129954000	EP400NL_TMEM132D (Breakpoint)	-:12:132606000|+:12:129954000	456	0.35	0	PossibleLargeIndel	12:132606000
14	EP400NL_TMEM132D	12	132588000	EP400NL_TMEM132D (Breakpoint)	+:12:132588000|-:12:129927000	385	0.43	0	PossibleLargeIndel	12:129927000
14	ESYT1	12	56538000	ESYT1 (Breakpoint)	+:12:56538000|-:12:71224500	277	0.26	0	PossibleLargeIndel	12:71224500
14	ESYT1	12	56536500	ESYT1 (Breakpoint)	-:12:64369500|-:12:56536500	154	0.3	0	PossibleInversion	12:64369500
14	ESYT1	12	64368000	ESYT1 (Breakpoint)	-:12:56536500|-:12:64368000	152	0.3	0	PossibleInversion	12:56536500
14	ESYT1	12	56407500	ESYT1 (Breakpoint)	+:12:56407500|-:12:56532000	55	0.12	0	PossibleLargeIndel	12:56532000
14	ESYT1	12	56533500	ESYT1 (Breakpoint)	+:12:56533500|+:12:72088500	24	0.13	0	PossibleInversion	12:72088500
14	ESYT1	12	72090000	ESYT1 (Breakpoint)	+:12:72090000|+:12:56532000	22	0.17	0	PossibleInversion	12:56532000
14	ESYT1_IKZF4	12	56407500	ESYT1_IKZF4 (Breakpoint)	+:12:56407500|-:12:56532000	55	0.12	0	PossibleLargeIndel	12:56532000
14	ESYT1_PTPRR	12	56538000	ESYT1_PTPRR (Breakpoint)	+:12:56538000|-:12:71224500	277	0.26	0	PossibleLargeIndel	12:71224500
14	ESYT1_SRGAP1	12	56536500	ESYT1_SRGAP1 (Breakpoint)	-:12:64369500|-:12:56536500	154	0.3	0	PossibleInversion	12:64369500
14	ESYT1_SRGAP1	12	64368000	ESYT1_SRGAP1 (Breakpoint)	-:12:56536500|-:12:64368000	152	0.3	0	PossibleInversion	12:56536500
14	ETV6	12	11827500	ETV6 (Breakpoint)	+:12:11827500|-:12:12072000	30	0.33	0	PossibleLargeIndel	12:12072000
14	FAM101A	12	124521000	FAM101A (Breakpoint)	+:12:124521000|+:5:41038500	62	0.35	0	Translocation	5:41038500
14	FAM101A_MROH2B	12	124521000	FAM101A_MROH2B (Breakpoint)	+:12:124521000|+:5:41038500	62	0.35	0	Translocation	5:41038500
14	FAM19A2	12	66576000	FAM19A2 (Breakpoint)	+:12:66576000|+:12:62653500	159	0.1	0	PossibleInversion	12:62653500
14	FAM19A2	12	60445500	FAM19A2 (Breakpoint)	-:12:62610000|+:12:60445500	211	0.4	0	PossibleLargeIndel	12:62610000
14	FAM19A2	12	68626500	FAM19A2 (Breakpoint)	+:12:68626500|-:12:62350500	159	0.17	0	PossibleLargeIndel	12:62350500
14	FAM19A2	12	62655000	FAM19A2 (Breakpoint)	+:12:62655000|+:12:66577500	81	0.1	0	PossibleInversion	12:66577500
14	FAM19A2	12	62373000	FAM19A2 (Breakpoint)	+:12:62373000|+:20:53395500	79	0.22	0	Translocation	20:53395500
14	FAM19A2	20	53397000	FAM19A2 (Breakpoint)	+:20:53397000|+:12:62371500	79	0.2	0	Translocation	12:62371500
14	FAM19A2	12	60447000	FAM19A2 (Breakpoint)	+:12:60447000|-:12:62613000	58	0.12	0	PossibleLargeIndel	12:62613000
14	FBRSL1	12	118275000	FBRSL1 (Breakpoint)	-:12:133104000|+:12:118275000	52	0.21	0	PossibleLargeIndel	12:133104000
14	FBRSL1_KSR2	12	118275000	FBRSL1_KSR2 (Breakpoint)	-:12:133104000|+:12:118275000	52	0.21	0	PossibleLargeIndel	12:133104000
14	FBXO4	5	41935500	FBXO4 (Breakpoint)	+:5:41935500|-:20:48199500	465	0.4	0	Translocation	20:48199500
14	FRS2	12	69897000	FRS2 (Breakpoint)	-:12:64866000|-:12:69897000	258	0.15	0	PossibleInversion	12:64866000
14	FRS2	12	64864500	FRS2 (Breakpoint)	-:12:69897000|-:12:64864500	245	0.23	0	PossibleInversion	12:69897000
14	FRS2	12	58306500	FRS2 (Breakpoint)	+:12:58306500|+:12:69903000	241	0.2	0	PossibleInversion	12:69903000
14	FRS2	12	69973500	FRS2 (Breakpoint)	+:12:69973500|-:12:62905500	224	0.2	0	PossibleLargeIndel	12:62905500
14	FRS2	12	64198500	FRS2 (Breakpoint)	+:12:64198500|-:12:69952500	193	0.11	0	PossibleLargeIndel	12:69952500
14	FRS2	12	64863000	FRS2 (Breakpoint)	+:12:64863000|-:12:69892500	172	0.16	0	PossibleLargeIndel	12:69892500
14	FRS2	12	69898500	FRS2 (Breakpoint)	-:12:56806500|+:12:69898500	146	0.13	0	PossibleLargeIndel	12:56806500
14	FRS2	12	72114000	FRS2 (Breakpoint)	+:12:72114000|-:12:69900000	138	0.12	0	PossibleLargeIndel	12:69900000
14	FRS2_MON2	12	69973500	FRS2_MON2 (Breakpoint)	+:12:69973500|-:12:62905500	224	0.2	0	PossibleLargeIndel	12:62905500
14	FRS2_TBK1	12	69897000	FRS2_TBK1 (Breakpoint)	-:12:64866000|-:12:69897000	258	0.15	0	PossibleInversion	12:64866000
14	FRS2_TBK1	12	64864500	FRS2_TBK1 (Breakpoint)	-:12:69897000|-:12:64864500	245	0.23	0	PossibleInversion	12:69897000
14	FRS2_TMEM5	12	64198500	FRS2_TMEM5 (Breakpoint)	+:12:64198500|-:12:69952500	193	0.11	0	PossibleLargeIndel	12:69952500
14	GABRA4	4	46941000	GABRA4 (Breakpoint)	-:4:38190000|-:4:46941000	45	0.13	0	PossibleInversion	4:38190000
14	GABRA4	4	38188500	GABRA4 (Breakpoint)	-:4:46942500|-:4:38188500	43	0.12	0	PossibleInversion	4:46942500
14	GABRB1	4	47421000	GABRB1 (Breakpoint)	-:4:49057500|+:4:47421000	94	0.25	0	PossibleLargeIndel	4:49057500
14	GABRB1_CWH43	4	47421000	GABRB1_CWH43 (Breakpoint)	-:4:49057500|+:4:47421000	94	0.25	0	PossibleLargeIndel	4:49057500
14	GLT1D1	12	71028000	GLT1D1 (Breakpoint)	-:12:129349500|+:12:71028000	137	0.1	0	PossibleLargeIndel	12:129349500
14	GLT1D1_PTPRB	12	71028000	GLT1D1_PTPRB (Breakpoint)	-:12:129349500|+:12:71028000	137	0.1	0	PossibleLargeIndel	12:129349500
14	GOLGA3	12	133402500	GOLGA3 (Breakpoint)	-:12:109954500|-:12:133402500	69	0.18	0	PossibleInversion	12:109954500
14	GOLGA3	12	109956000	GOLGA3 (Breakpoint)	-:12:133404000|-:12:109956000	64	0.15	0	PossibleInversion	12:133404000
14	GPN3	12	110893500	GPN3 (Breakpoint)	+:12:110893500|+:12:104137500	67	0.19	0	PossibleInversion	12:104137500
14	GPN3	12	104139000	GPN3 (Breakpoint)	+:12:104139000|+:12:110895000	60	0.29	0	PossibleInversion	12:110895000
14	GPN3_STAB2	12	110893500	GPN3_STAB2 (Breakpoint)	+:12:110893500|+:12:104137500	67	0.19	0	PossibleInversion	12:104137500
14	GPN3_STAB2	12	104139000	GPN3_STAB2 (Breakpoint)	+:12:104139000|+:12:110895000	60	0.29	0	PossibleInversion	12:110895000
14	GPR133	12	131553000	GPR133 (Breakpoint)	+:12:131553000|-:12:132655500	275	0.58	0	PossibleLargeIndel	12:132655500
14	GPR133	5	31812000	GPR133 (Breakpoint)	-:12:131554500|-:5:31812000	136	0.4	0	Translocation	12:131554500
14	GPR133	12	131553000	GPR133 (Breakpoint)	-:5:31812000|-:12:131553000	98	0.33	0	Translocation	5:31812000
14	GPR133	5	16981500	GPR133 (Breakpoint)	+:5:16981500|+:12:131565000	96	0.28	0	Translocation	12:131565000
14	GPR133	5	34752000	GPR133 (Breakpoint)	-:12:131556000|-:5:34752000	89	0.18	0	Translocation	12:131556000
14	GPR133	12	131554500	GPR133 (Breakpoint)	-:5:34753500|-:12:131554500	34	0.16	0	Translocation	5:34753500
14	GPR133_PDZD2	5	31812000	GPR133_PDZD2 (Breakpoint)	-:12:131554500|-:5:31812000	136	0.4	0	Translocation	12:131554500
14	GPR133_PDZD2	12	131553000	GPR133_PDZD2 (Breakpoint)	-:5:31812000|-:12:131553000	98	0.33	0	Translocation	5:31812000
14	GPR133_RAI14	5	34752000	GPR133_RAI14 (Breakpoint)	-:12:131556000|-:5:34752000	89	0.18	0	Translocation	12:131556000
14	GPR133_RAI14	12	131554500	GPR133_RAI14 (Breakpoint)	-:5:34753500|-:12:131554500	34	0.16	0	Translocation	5:34753500
14	GRIP1	12	62712000	GRIP1 (Breakpoint)	+:12:62712000|-:12:67053000	240	0.22	0	PossibleLargeIndel	12:67053000
14	GRIP1	12	66966000	GRIP1 (Breakpoint)	-:12:117082500|-:12:66966000	114	0.16	0	PossibleInversion	12:117082500
14	GRIP1	12	117081000	GRIP1 (Breakpoint)	-:12:66966000|-:12:117081000	92	0.16	0	PossibleInversion	12:66966000
14	GRIP1_USP15	12	62712000	GRIP1_USP15 (Breakpoint)	+:12:62712000|-:12:67053000	240	0.22	0	PossibleLargeIndel	12:67053000
14	HCAR1	12	123910500	HCAR1 (Breakpoint)	+:12:123910500|-:12:123162000	108	0.34	0	PossibleLargeIndel	12:123162000
14	HCAR1_RILPL2	12	123910500	HCAR1_RILPL2 (Breakpoint)	+:12:123910500|-:12:123162000	108	0.34	0	PossibleLargeIndel	12:123162000
14	HECTD4	12	112606500	HECTD4 (Breakpoint)	+:12:112606500|+:12:114412500	93	0.1	0	PossibleInversion	12:114412500
14	HMGA2	12	64848000	HMGA2 (Breakpoint)	+:12:64848000|+:12:66339000	263	0.12	0	PossibleInversion	12:66339000
14	HMGA2	12	66340500	HMGA2 (Breakpoint)	+:12:66340500|+:12:64846500	204	0.11	0	PossibleInversion	12:64846500
14	HMGA2	12	64849500	HMGA2 (Breakpoint)	+:12:64849500|+:12:66342000	191	0.33	0	PossibleInversion	12:66342000
14	HMGA2	12	66228000	HMGA2 (Breakpoint)	+:12:66228000|-:12:62809500	239	0.14	0	PossibleLargeIndel	12:62809500
14	HMGA2_TBK1	12	64848000	HMGA2_TBK1 (Breakpoint)	+:12:64848000|+:12:66339000	263	0.12	0	PossibleInversion	12:66339000
14	HMGA2_TBK1	12	66340500	HMGA2_TBK1 (Breakpoint)	+:12:66340500|+:12:64846500	204	0.11	0	PossibleInversion	12:64846500
14	HMGA2_USP15	12	66228000	HMGA2_USP15 (Breakpoint)	+:12:66228000|-:12:62809500	239	0.14	0	PossibleLargeIndel	12:62809500
14	HSD17B6	12	57160500	HSD17B6 (Breakpoint)	+:12:57160500|+:12:70272000	89	0.16	0	PossibleInversion	12:70272000
14	HSD17B6_MYRFL	12	57160500	HSD17B6_MYRFL (Breakpoint)	+:12:57160500|+:12:70272000	89	0.16	0	PossibleInversion	12:70272000
14	IKZF4	12	56413500	IKZF4 (Breakpoint)	-:12:60982500|+:12:56413500	192	0.3	0	PossibleLargeIndel	12:60982500
14	IKZF4	12	56407500	IKZF4 (Breakpoint)	+:12:56407500|-:12:56532000	55	0.12	0	PossibleLargeIndel	12:56532000
14	IKZF4_ESYT1	12	56407500	IKZF4_ESYT1 (Breakpoint)	+:12:56407500|-:12:56532000	55	0.12	0	PossibleLargeIndel	12:56532000
14	IL7R	5	35854500	IL7R (Breakpoint)	-:12:123690000|-:5:35854500	36	0.15	0	Translocation	12:123690000
14	IL7R	12	123688500	IL7R (Breakpoint)	-:5:35856000|-:12:123688500	35	0.14	0	Translocation	5:35856000
14	IL7R_MPHOSPH9	5	35854500	IL7R_MPHOSPH9 (Breakpoint)	-:12:123690000|-:5:35854500	36	0.15	0	Translocation	12:123690000
14	IL7R_MPHOSPH9	12	123688500	IL7R_MPHOSPH9 (Breakpoint)	-:5:35856000|-:12:123688500	35	0.14	0	Translocation	5:35856000
14	IRX2	5	2748000	IRX2 (Breakpoint)	-:5:32002500|+:5:2748000	50	0.25	0	PossibleLargeIndel	5:32002500
14	IRX2_PDZD2	5	2748000	IRX2_PDZD2 (Breakpoint)	-:5:32002500|+:5:2748000	50	0.25	0	PossibleLargeIndel	5:32002500
14	KCNIP4	4	19221000	KCNIP4 (Breakpoint)	+:4:19221000|-:4:21651000	51	0.22	0	PossibleLargeIndel	4:21651000
14	KCNIP4	4	19224000	KCNIP4 (Breakpoint)	-:4:21652500|+:4:19224000	31	0.18	0	PossibleLargeIndel	4:21652500
14	KRT6C	12	117114000	KRT6C (Breakpoint)	+:12:117114000|+:12:52867500	147	0.31	0	PossibleInversion	12:52867500
14	KRT6C	12	52867500	KRT6C (Breakpoint)	+:12:52867500|+:12:117112500	90	0.17	0	PossibleInversion	12:117112500
14	KRT84	12	65379000	KRT84 (Breakpoint)	-:12:52771500|+:12:65379000	108	0.22	0	PossibleLargeIndel	12:52771500
14	KSR2	12	118141500	KSR2 (Breakpoint)	+:12:118141500|-:12:87601500	185	0.21	0	PossibleLargeIndel	12:87601500
14	KSR2	12	118222500	KSR2 (Breakpoint)	+:12:118222500|-:12:119680500	103	0.29	0	PossibleLargeIndel	12:119680500
14	KSR2	12	118275000	KSR2 (Breakpoint)	-:12:133104000|+:12:118275000	52	0.21	0	PossibleLargeIndel	12:133104000
14	KSR2_FBRSL1	12	118275000	KSR2_FBRSL1 (Breakpoint)	-:12:133104000|+:12:118275000	52	0.21	0	PossibleLargeIndel	12:133104000
14	LIN7A	12	65331000	LIN7A (Breakpoint)	+:12:65331000|-:12:81306000	879	0.31	0	PossibleLargeIndel	12:81306000
14	LIN7A	12	65334000	LIN7A (Breakpoint)	-:12:81307500|+:12:65334000	306	0.17	0	PossibleLargeIndel	12:81307500
14	LIN7A	12	81235500	LIN7A (Breakpoint)	+:12:81235500|-:12:72564000	165	0.25	0	PossibleLargeIndel	12:72564000
14	LRRC10	12	70366500	LRRC10 (Breakpoint)	-:12:70003500|-:12:70366500	368	0.1	0	PossibleInversion	12:70003500
14	LRRC10	12	70003500	LRRC10 (Breakpoint)	-:12:129106500|+:12:70003500	245	0.12	0	PossibleLargeIndel	12:129106500
14	LRRC10_TMEM132C	12	70003500	LRRC10_TMEM132C (Breakpoint)	-:12:129106500|+:12:70003500	245	0.12	0	PossibleLargeIndel	12:129106500
14	LRRIQ1	12	69549000	LRRIQ1 (Breakpoint)	-:12:85638000|+:12:69549000	388	0.21	0	PossibleLargeIndel	12:85638000
14	LRRIQ1	12	85645500	LRRIQ1 (Breakpoint)	+:12:85645500|-:12:81834000	391	0.12	0	PossibleLargeIndel	12:81834000
14	LRRIQ1	20	51246000	LRRIQ1 (Breakpoint)	+:20:51246000|+:12:85626000	193	0.12	0	Translocation	12:85626000
14	LRRIQ1	12	85627500	LRRIQ1 (Breakpoint)	+:12:85627500|+:20:51247500	187	0.17	0	Translocation	20:51247500
14	LRRIQ1_PPFIA2	12	85645500	LRRIQ1_PPFIA2 (Breakpoint)	+:12:85645500|-:12:81834000	391	0.12	0	PossibleLargeIndel	12:81834000
14	MBP	18	74500500	MBP (Breakpoint)	-:18:74698500|+:18:74500500	41	0.26	0	PossibleLargeIndel	18:74698500
14	MDM2	12	87310500	MDM2 (Breakpoint)	+:12:87310500|+:12:69220500	218	0.12	0	PossibleInversion	12:69220500
14	MDM2	12	69220500	MDM2 (Breakpoint)	+:12:69220500|+:12:87309000	198	0.11	0	PossibleInversion	12:87309000
14	MDM2	12	69222000	MDM2 (Breakpoint)	-:12:64359000|+:12:69222000	315	0.22	0	PossibleLargeIndel	12:64359000
14	MDM2_SRGAP1	12	69222000	MDM2_SRGAP1 (Breakpoint)	-:12:64359000|+:12:69222000	315	0.22	0	PossibleLargeIndel	12:64359000
14	MLEC	12	120186000	MLEC (Breakpoint)	-:12:121126500|+:12:120186000	29	0.15	0	PossibleLargeIndel	12:121126500
14	MLEC_CIT	12	120186000	MLEC_CIT (Breakpoint)	-:12:121126500|+:12:120186000	29	0.15	0	PossibleLargeIndel	12:121126500
14	MON2	12	62904000	MON2 (Breakpoint)	-:12:129099000|+:12:62904000	358	0.27	0	PossibleLargeIndel	12:129099000
14	MON2	12	62874000	MON2 (Breakpoint)	-:5:1674000|-:12:62874000	145	0.17	0	Translocation	5:1674000
14	MON2	12	62905500	MON2 (Breakpoint)	+:12:62905500|-:12:71239500	229	0.37	0	PossibleLargeIndel	12:71239500
14	MON2	12	57235500	MON2 (Breakpoint)	+:12:57235500|-:12:62886000	191	0.27	0	PossibleLargeIndel	12:62886000
14	MON2	5	1675500	MON2 (Breakpoint)	-:12:62875500|-:5:1675500	129	0.15	0	Translocation	12:62875500
14	MON2	12	69973500	MON2 (Breakpoint)	+:12:69973500|-:12:62905500	224	0.2	0	PossibleLargeIndel	12:62905500
14	MON2	12	57238500	MON2 (Breakpoint)	-:12:62887500|+:12:57238500	77	0.13	0	PossibleLargeIndel	12:62887500
14	MON2_FRS2	12	69973500	MON2_FRS2 (Breakpoint)	+:12:69973500|-:12:62905500	224	0.2	0	PossibleLargeIndel	12:62905500
14	MON2_PTPRR	12	62905500	MON2_PTPRR (Breakpoint)	+:12:62905500|-:12:71239500	229	0.37	0	PossibleLargeIndel	12:71239500
14	MON2_TMEM132C	12	62904000	MON2_TMEM132C (Breakpoint)	-:12:129099000|+:12:62904000	358	0.27	0	PossibleLargeIndel	12:129099000
14	MORN3	12	122098500	MORN3 (Breakpoint)	+:12:122098500|-:12:61497000	91	0.11	0	PossibleLargeIndel	12:61497000
14	MORN3	12	122092500	MORN3 (Breakpoint)	-:12:80848500|-:12:122092500	46	0.13	0	PossibleInversion	12:80848500
14	MORN3	12	80847000	MORN3 (Breakpoint)	-:12:122092500|-:12:80847000	31	0.15	0	PossibleInversion	12:122092500
14	MORN3	12	122098500	MORN3 (Breakpoint)	+:12:122098500|-:12:122050500	52	0.18	0	PossibleLargeIndel	12:122050500
14	MORN3_PTPRQ	12	122092500	MORN3_PTPRQ (Breakpoint)	-:12:80848500|-:12:122092500	46	0.13	0	PossibleInversion	12:80848500
14	MORN3_PTPRQ	12	80847000	MORN3_PTPRQ (Breakpoint)	-:12:122092500|-:12:80847000	31	0.15	0	PossibleInversion	12:122092500
14	MPHOSPH9	12	123700500	MPHOSPH9 (Breakpoint)	-:12:115375500|+:12:123700500	83	0.16	0	PossibleLargeIndel	12:115375500
14	MPHOSPH9	5	35854500	MPHOSPH9 (Breakpoint)	-:12:123690000|-:5:35854500	36	0.15	0	Translocation	12:123690000
14	MPHOSPH9	12	123688500	MPHOSPH9 (Breakpoint)	-:5:35856000|-:12:123688500	35	0.14	0	Translocation	5:35856000
14	MPHOSPH9_IL7R	5	35854500	MPHOSPH9_IL7R (Breakpoint)	-:12:123690000|-:5:35854500	36	0.15	0	Translocation	12:123690000
14	MPHOSPH9_IL7R	12	123688500	MPHOSPH9_IL7R (Breakpoint)	-:5:35856000|-:12:123688500	35	0.14	0	Translocation	5:35856000
14	MROH2B	12	124521000	MROH2B (Breakpoint)	+:12:124521000|+:5:41038500	62	0.35	0	Translocation	5:41038500
14	MROH2B_FAM101A	12	124521000	MROH2B_FAM101A (Breakpoint)	+:12:124521000|+:5:41038500	62	0.35	0	Translocation	5:41038500
14	MSRB3	12	60985500	MSRB3 (Breakpoint)	-:12:65766000|-:12:60985500	247	0.17	0	PossibleInversion	12:65766000
14	MSRB3	12	65764500	MSRB3 (Breakpoint)	-:12:60985500|-:12:65764500	193	0.2	0	PossibleInversion	12:60985500
14	MTMR12	12	129976500	MTMR12 (Breakpoint)	+:12:129976500|+:5:32253000	171	0.55	0	Translocation	5:32253000
14	MTMR12	5	32253000	MTMR12 (Breakpoint)	+:5:32253000|+:12:129973500	171	0.3	0	Translocation	12:129973500
14	MTMR12_TMEM132D	12	129976500	MTMR12_TMEM132D (Breakpoint)	+:12:129976500|+:5:32253000	171	0.55	0	Translocation	5:32253000
14	MTMR12_TMEM132D	5	32253000	MTMR12_TMEM132D (Breakpoint)	+:5:32253000|+:12:129973500	171	0.3	0	Translocation	12:129973500
14	MYL2	12	111355500	MYL2 (Breakpoint)	+:12:111355500|+:12:112842000	165	0.23	0	PossibleInversion	12:112842000
14	MYL2	12	112843500	MYL2 (Breakpoint)	+:12:112843500|+:12:111357000	101	0.25	0	PossibleInversion	12:111357000
14	MYL2_RPL6	12	112843500	MYL2_RPL6 (Breakpoint)	+:12:112843500|+:12:111357000	101	0.25	0	PossibleInversion	12:111357000
14	MYRFL	12	70221000	MYRFL (Breakpoint)	-:12:71169000|-:12:70221000	407	0.19	0	PossibleInversion	12:71169000
14	MYRFL	12	71167500	MYRFL (Breakpoint)	-:12:70221000|-:12:71167500	361	0.23	0	PossibleInversion	12:70221000
14	MYRFL	12	70266000	MYRFL (Breakpoint)	-:12:72678000|+:12:70266000	648	0.4	0	PossibleLargeIndel	12:72678000
14	MYRFL	12	70269000	MYRFL (Breakpoint)	-:12:67317000|-:12:70269000	161	0.12	0	PossibleInversion	12:67317000
14	MYRFL	12	70294500	MYRFL (Breakpoint)	+:12:70294500|-:12:69975000	304	0.21	0	PossibleLargeIndel	12:69975000
14	MYRFL	12	70288500	MYRFL (Breakpoint)	-:12:57034500|+:12:70288500	249	0.36	0	PossibleLargeIndel	12:57034500
14	MYRFL	12	70365000	MYRFL (Breakpoint)	-:12:70288500|+:12:70365000	241	0.12	0	PossibleLargeIndel	12:70288500
14	MYRFL	12	71251500	MYRFL (Breakpoint)	+:12:71251500|-:12:70281000	170	0.27	0	PossibleLargeIndel	12:70281000
14	MYRFL	12	57160500	MYRFL (Breakpoint)	+:12:57160500|+:12:70272000	89	0.16	0	PossibleInversion	12:70272000
14	MYRFL	12	62809500	MYRFL (Breakpoint)	+:12:62809500|-:12:70294500	149	0.28	0	PossibleLargeIndel	12:70294500
14	MYRFL	12	70267500	MYRFL (Breakpoint)	+:12:70267500|-:12:72681000	57	0.1	0	PossibleLargeIndel	12:72681000
14	MYRFL	12	70290000	MYRFL (Breakpoint)	+:12:70290000|-:12:57037500	42	0.14	0	PossibleLargeIndel	12:57037500
14	MYRFL_ATP5B	12	70288500	MYRFL_ATP5B (Breakpoint)	-:12:57034500|+:12:70288500	249	0.36	0	PossibleLargeIndel	12:57034500
14	MYRFL_HSD17B6	12	57160500	MYRFL_HSD17B6 (Breakpoint)	+:12:57160500|+:12:70272000	89	0.16	0	PossibleInversion	12:70272000
14	MYRFL_PTPRR	12	71251500	MYRFL_PTPRR (Breakpoint)	+:12:71251500|-:12:70281000	170	0.27	0	PossibleLargeIndel	12:70281000
14	MYRFL_TRHDE	12	70266000	MYRFL_TRHDE (Breakpoint)	-:12:72678000|+:12:70266000	648	0.4	0	PossibleLargeIndel	12:72678000
14	MYRFL_USP15	12	62809500	MYRFL_USP15 (Breakpoint)	+:12:62809500|-:12:70294500	149	0.28	0	PossibleLargeIndel	12:70294500
14	NAV3	12	78328500	NAV3 (Breakpoint)	-:12:61153500|+:12:78328500	136	0.1	0	PossibleLargeIndel	12:61153500
14	NCOR2	12	129075000	NCOR2 (Breakpoint)	+:12:129075000|-:12:124878000	359	0.24	0	PossibleLargeIndel	12:124878000
14	NCOR2	12	125014500	NCOR2 (Breakpoint)	+:12:125014500|-:5:38121000	298	0.21	0	Translocation	5:38121000
14	NCOR2	20	48604500	NCOR2 (Breakpoint)	-:12:124956000|-:20:48604500	176	0.11	0	Translocation	12:124956000
14	NCOR2_SNAI1	20	48604500	NCOR2_SNAI1 (Breakpoint)	-:12:124956000|-:20:48604500	176	0.11	0	Translocation	12:124956000
14	NCOR2_TMEM132C	12	129075000	NCOR2_TMEM132C (Breakpoint)	+:12:129075000|-:12:124878000	359	0.24	0	PossibleLargeIndel	12:124878000
14	NFATC2	12	128890500	NFATC2 (Breakpoint)	+:12:128890500|-:20:50047500	377	0.12	0	Translocation	20:50047500
14	NFATC2	12	125229000	NFATC2 (Breakpoint)	-:20:50014500|+:12:125229000	270	0.1	0	Translocation	20:50014500
14	NFATC2	20	50146500	NFATC2 (Breakpoint)	+:20:50146500|-:12:69448500	291	0.13	0	Translocation	12:69448500
14	NFATC2_TMEM132C	12	128890500	NFATC2_TMEM132C (Breakpoint)	+:12:128890500|-:20:50047500	377	0.12	0	Translocation	20:50047500
14	NKAIN4	12	126978000	NKAIN4 (Breakpoint)	-:20:61873500|+:12:126978000	179	0.4	0	Translocation	20:61873500
14	NUP107	12	69085500	NUP107 (Breakpoint)	+:12:69085500|-:12:64320000	291	0.15	0	PossibleLargeIndel	12:64320000
14	NUP107	12	69099000	NUP107 (Breakpoint)	+:12:69099000|-:12:72105000	116	0.1	0	PossibleLargeIndel	12:72105000
14	NUP107	12	69069000	NUP107 (Breakpoint)	+:12:69069000|-:12:69087000	83	0.11	0	PossibleLargeIndel	12:69087000
14	NUP107_SRGAP1	12	69085500	NUP107_SRGAP1 (Breakpoint)	+:12:69085500|-:12:64320000	291	0.15	0	PossibleLargeIndel	12:64320000
14	NUP155	5	37315500	NUP155 (Breakpoint)	-:12:65272500|-:5:37315500	724	0.24	0	Translocation	12:65272500
14	NUP155	12	65271000	NUP155 (Breakpoint)	-:5:37315500|-:12:65271000	384	0.3	0	Translocation	5:37315500
14	NUP155	5	37320000	NUP155 (Breakpoint)	+:5:37320000|+:12:72145500	253	0.1	0	Translocation	12:72145500
14	NUP155	5	37369500	NUP155 (Breakpoint)	+:5:37369500|+:12:61767000	216	0.13	0	Translocation	12:61767000
14	NUP155	12	56394000	NUP155 (Breakpoint)	-:5:37341000|+:12:56394000	239	0.1	0	Translocation	5:37341000
14	NUP155_SUOX	12	56394000	NUP155_SUOX (Breakpoint)	-:5:37341000|+:12:56394000	239	0.1	0	Translocation	5:37341000
14	NUP155_TBC1D30	5	37315500	NUP155_TBC1D30 (Breakpoint)	-:12:65272500|-:5:37315500	724	0.24	0	Translocation	12:65272500
14	NUP155_TBC1D30	12	65271000	NUP155_TBC1D30 (Breakpoint)	-:5:37315500|-:12:65271000	384	0.3	0	Translocation	5:37315500
14	ORAI1	12	112272000	ORAI1 (Breakpoint)	+:12:112272000|+:12:122065500	345	0.26	0	PossibleInversion	12:122065500
14	ORAI1	12	81783000	ORAI1 (Breakpoint)	-:12:122065500|-:12:81783000	314	0.19	0	PossibleInversion	12:122065500
14	ORAI1	12	122067000	ORAI1 (Breakpoint)	-:12:81784500|-:12:122067000	200	0.11	0	PossibleInversion	12:81784500
14	ORAI1_PPFIA2	12	81783000	ORAI1_PPFIA2 (Breakpoint)	-:12:122065500|-:12:81783000	314	0.19	0	PossibleInversion	12:122065500
14	ORAI1_PPFIA2	12	122067000	ORAI1_PPFIA2 (Breakpoint)	-:12:81784500|-:12:122067000	200	0.11	0	PossibleInversion	12:81784500
14	OS9	12	64354500	OS9 (Breakpoint)	-:12:58099500|+:12:64354500	683	0.35	0	PossibleLargeIndel	12:58099500
14	OS9_SRGAP1	12	64354500	OS9_SRGAP1 (Breakpoint)	-:12:58099500|+:12:64354500	683	0.35	0	PossibleLargeIndel	12:58099500
14	OSMR	5	38895000	OSMR (Breakpoint)	-:12:61344000|+:5:38895000	111	0.13	0	Translocation	12:61344000
14	PDZD2	5	32005500	PDZD2 (Breakpoint)	-:5:32005500|-:5:1992000	176	0.37	0	PossibleInversion	5:1992000
14	PDZD2	5	31788000	PDZD2 (Breakpoint)	-:5:31788000|-:12:132601500	166	0.12	0	Translocation	12:132601500
14	PDZD2	5	31812000	PDZD2 (Breakpoint)	+:5:31812000|+:5:1686000	149	0.47	0	PossibleInversion	5:1686000
14	PDZD2	5	1684500	PDZD2 (Breakpoint)	+:5:1684500|+:5:31810500	146	0.25	0	PossibleInversion	5:31810500
14	PDZD2	5	31812000	PDZD2 (Breakpoint)	-:12:131554500|-:5:31812000	136	0.4	0	Translocation	12:131554500
14	PDZD2	5	32020500	PDZD2 (Breakpoint)	-:5:34705500|+:5:32020500	260	0.44	0	PossibleLargeIndel	5:34705500
14	PDZD2	5	34441500	PDZD2 (Breakpoint)	+:5:34441500|-:5:32020500	233	0.34	0	PossibleLargeIndel	5:32020500
14	PDZD2	12	132598500	PDZD2 (Breakpoint)	-:5:31786500|-:12:132598500	108	0.16	0	Translocation	5:31786500
14	PDZD2	5	31785000	PDZD2 (Breakpoint)	-:12:132600000|-:5:31785000	108	0.16	0	Translocation	12:132600000
14	PDZD2	12	131553000	PDZD2 (Breakpoint)	-:5:31812000|-:12:131553000	98	0.33	0	Translocation	5:31812000
14	PDZD2	5	32026500	PDZD2 (Breakpoint)	+:5:32026500|+:5:32362500	97	0.17	0	PossibleInversion	5:32362500
14	PDZD2	5	32364000	PDZD2 (Breakpoint)	+:5:32364000|+:5:32025000	91	0.2	0	PossibleInversion	5:32025000
14	PDZD2	5	31827000	PDZD2 (Breakpoint)	+:5:31827000|+:5:1332000	88	0.36	0	PossibleInversion	5:1332000
14	PDZD2	5	31809000	PDZD2 (Breakpoint)	-:12:58285500|+:5:31809000	86	0.11	0	Translocation	12:58285500
14	PDZD2	5	32010000	PDZD2 (Breakpoint)	-:12:64048500|+:5:32010000	115	0.18	0	Translocation	12:64048500
14	PDZD2	5	31812000	PDZD2 (Breakpoint)	+:5:31812000|-:12:58288500	72	0.28	0	Translocation	12:58288500
14	PDZD2	5	32004000	PDZD2 (Breakpoint)	-:5:32026500|+:5:32004000	92	0.29	0	PossibleLargeIndel	5:32026500
14	PDZD2	5	32031000	PDZD2 (Breakpoint)	+:5:32031000|+:5:34461000	55	0.2	0	PossibleInversion	5:34461000
14	PDZD2	5	34456500	PDZD2 (Breakpoint)	-:5:34456500|-:5:32031000	30	0.16	0	PossibleInversion	5:32031000
14	PDZD2	12	71623500	PDZD2 (Breakpoint)	-:5:32008500|+:12:71623500	96	0.19	0	Translocation	5:32008500
14	PDZD2	5	2745000	PDZD2 (Breakpoint)	+:5:2745000|-:5:32001000	54	0.18	0	PossibleLargeIndel	5:32001000
14	PDZD2	5	2748000	PDZD2 (Breakpoint)	-:5:32002500|+:5:2748000	50	0.25	0	PossibleLargeIndel	5:32002500
14	PDZD2	5	34461000	PDZD2 (Breakpoint)	+:5:34461000|+:5:32029500	48	0.16	0	PossibleInversion	5:32029500
14	PDZD2	5	32365500	PDZD2 (Breakpoint)	+:5:32365500|+:5:32028000	44	0.21	0	PossibleInversion	5:32028000
14	PDZD2	5	32005500	PDZD2 (Breakpoint)	+:5:32005500|-:5:32029500	31	0.11	0	PossibleLargeIndel	5:32029500
14	PDZD2	5	31827000	PDZD2 (Breakpoint)	+:5:31827000|-:5:1669500	44	0.14	0	PossibleLargeIndel	5:1669500
14	PDZD2	5	34462500	PDZD2 (Breakpoint)	+:5:34462500|+:5:32032500	22	0.1	0	PossibleInversion	5:32032500
14	PDZD2_CLPTM1L	5	31827000	PDZD2_CLPTM1L (Breakpoint)	+:5:31827000|+:5:1332000	88	0.36	0	PossibleInversion	5:1332000
14	PDZD2_DPY19L2	5	32010000	PDZD2_DPY19L2 (Breakpoint)	-:12:64048500|+:5:32010000	115	0.18	0	Translocation	12:64048500
14	PDZD2_EP400NL	5	31788000	PDZD2_EP400NL (Breakpoint)	-:5:31788000|-:12:132601500	166	0.12	0	Translocation	12:132601500
14	PDZD2_EP400NL	12	132598500	PDZD2_EP400NL (Breakpoint)	-:5:31786500|-:12:132598500	108	0.16	0	Translocation	5:31786500
14	PDZD2_GPR133	5	31812000	PDZD2_GPR133 (Breakpoint)	-:12:131554500|-:5:31812000	136	0.4	0	Translocation	12:131554500
14	PDZD2_GPR133	12	131553000	PDZD2_GPR133 (Breakpoint)	-:5:31812000|-:12:131553000	98	0.33	0	Translocation	5:31812000
14	PDZD2_IRX2	5	2748000	PDZD2_IRX2 (Breakpoint)	-:5:32002500|+:5:2748000	50	0.25	0	PossibleLargeIndel	5:32002500
14	PDZD2_RAI14	5	32020500	PDZD2_RAI14 (Breakpoint)	-:5:34705500|+:5:32020500	260	0.44	0	PossibleLargeIndel	5:34705500
14	PDZD2_TSPAN8	12	71623500	PDZD2_TSPAN8 (Breakpoint)	-:5:32008500|+:12:71623500	96	0.19	0	Translocation	5:32008500
14	PDZD2_ZFR	5	32026500	PDZD2_ZFR (Breakpoint)	+:5:32026500|+:5:32362500	97	0.17	0	PossibleInversion	5:32362500
14	PDZD2_ZFR	5	32364000	PDZD2_ZFR (Breakpoint)	+:5:32364000|+:5:32025000	91	0.2	0	PossibleInversion	5:32025000
14	PLCXD3	5	41493000	PLCXD3 (Breakpoint)	+:5:41493000|-:12:123900000	68	0.2	0	Translocation	12:123900000
14	PLCXD3	5	41496000	PLCXD3 (Breakpoint)	-:12:123901500|+:5:41496000	58	0.21	0	Translocation	12:123901500
14	PLCXD3_RILPL2	5	41493000	PLCXD3_RILPL2 (Breakpoint)	+:5:41493000|-:12:123900000	68	0.2	0	Translocation	12:123900000
14	POLN	4	2140500	POLN (Breakpoint)	+:4:2140500|+:4:12079500	62	0.26	0	PossibleInversion	4:12079500
14	POLN	4	12081000	POLN (Breakpoint)	+:4:12081000|+:4:2139000	62	0.24	0	PossibleInversion	4:2139000
14	PPFIA2	12	81783000	PPFIA2 (Breakpoint)	-:12:122065500|-:12:81783000	314	0.19	0	PossibleInversion	12:122065500
14	PPFIA2	12	81894000	PPFIA2 (Breakpoint)	-:12:114022500|+:12:81894000	410	0.11	0	PossibleLargeIndel	12:114022500
14	PPFIA2	12	122067000	PPFIA2 (Breakpoint)	-:12:81784500|-:12:122067000	200	0.11	0	PossibleInversion	12:81784500
14	PPFIA2	12	85645500	PPFIA2 (Breakpoint)	+:12:85645500|-:12:81834000	391	0.12	0	PossibleLargeIndel	12:81834000
14	PPFIA2	12	82083000	PPFIA2 (Breakpoint)	-:12:125056500|+:12:82083000	320	0.12	0	PossibleLargeIndel	12:125056500
14	PPFIA2_LRRIQ1	12	85645500	PPFIA2_LRRIQ1 (Breakpoint)	+:12:85645500|-:12:81834000	391	0.12	0	PossibleLargeIndel	12:81834000
14	PPFIA2_ORAI1	12	81783000	PPFIA2_ORAI1 (Breakpoint)	-:12:122065500|-:12:81783000	314	0.19	0	PossibleInversion	12:122065500
14	PPFIA2_ORAI1	12	122067000	PPFIA2_ORAI1 (Breakpoint)	-:12:81784500|-:12:122067000	200	0.11	0	PossibleInversion	12:81784500
14	PPM1H	12	67477500	PPM1H (Breakpoint)	+:12:67477500|+:12:63321000	181	0.32	0	PossibleInversion	12:63321000
14	PPM1H	12	69756000	PPM1H (Breakpoint)	-:12:63313500|+:12:69756000	148	0.14	0	PossibleLargeIndel	12:63313500
14	PPM1H	12	63321000	PPM1H (Breakpoint)	+:12:63321000|+:12:67476000	144	0.22	0	PossibleInversion	12:67476000
14	PPM1H	12	69754500	PPM1H (Breakpoint)	+:12:69754500|-:12:63312000	142	0.16	0	PossibleLargeIndel	12:63312000
14	PPM1H_YEATS4	12	69756000	PPM1H_YEATS4 (Breakpoint)	-:12:63313500|+:12:69756000	148	0.14	0	PossibleLargeIndel	12:63313500
14	PRIM1	12	57141000	PRIM1 (Breakpoint)	-:12:57141000|-:12:71254500	154	0.2	0	PossibleInversion	12:71254500
14	PRIM1_PTPRR	12	57141000	PRIM1_PTPRR (Breakpoint)	-:12:57141000|-:12:71254500	154	0.2	0	PossibleInversion	12:71254500
14	PRLR	5	35079000	PRLR (Breakpoint)	+:5:35079000|-:5:18148500	36	0.15	0	PossibleLargeIndel	5:18148500
14	PRLR	5	35077500	PRLR (Breakpoint)	-:5:18145500|+:5:35077500	45	0.17	0	PossibleLargeIndel	5:18145500
14	PTGIS	20	48132000	PTGIS (Breakpoint)	-:12:62769000|+:20:48132000	105	0.27	0	Translocation	12:62769000
14	PTGIS	20	48133500	PTGIS (Breakpoint)	+:20:48133500|-:12:62772000	50	0.15	0	Translocation	12:62772000
14	PTGIS_USP15	20	48132000	PTGIS_USP15 (Breakpoint)	-:12:62769000|+:20:48132000	105	0.27	0	Translocation	12:62769000
14	PTPN11	12	112887000	PTPN11 (Breakpoint)	+:12:112887000|-:12:124291500	70	0.19	0	PossibleLargeIndel	12:124291500
14	PTPN11	12	112887000	PTPN11 (Breakpoint)	-:12:112887000|-:12:74260500	38	0.1	0	PossibleInversion	12:74260500
14	PTPN11_DNAH10	12	112887000	PTPN11_DNAH10 (Breakpoint)	+:12:112887000|-:12:124291500	70	0.19	0	PossibleLargeIndel	12:124291500
14	PTPRB	12	70933500	PTPRB (Breakpoint)	+:12:70933500|-:12:112593000	230	0.17	0	PossibleLargeIndel	12:112593000
14	PTPRB	12	70936500	PTPRB (Breakpoint)	-:12:112594500|+:12:70936500	124	0.12	0	PossibleLargeIndel	12:112594500
14	PTPRB	12	71028000	PTPRB (Breakpoint)	-:12:129349500|+:12:71028000	137	0.1	0	PossibleLargeIndel	12:129349500
14	PTPRB_GLT1D1	12	71028000	PTPRB_GLT1D1 (Breakpoint)	-:12:129349500|+:12:71028000	137	0.1	0	PossibleLargeIndel	12:129349500
14	PTPRQ	12	122092500	PTPRQ (Breakpoint)	-:12:80848500|-:12:122092500	46	0.13	0	PossibleInversion	12:80848500
14	PTPRQ	12	80847000	PTPRQ (Breakpoint)	-:12:122092500|-:12:80847000	31	0.15	0	PossibleInversion	12:122092500
14	PTPRQ_MORN3	12	122092500	PTPRQ_MORN3 (Breakpoint)	-:12:80848500|-:12:122092500	46	0.13	0	PossibleInversion	12:80848500
14	PTPRQ_MORN3	12	80847000	PTPRQ_MORN3 (Breakpoint)	-:12:122092500|-:12:80847000	31	0.15	0	PossibleInversion	12:122092500
14	PTPRR	12	70221000	PTPRR (Breakpoint)	-:12:71169000|-:12:70221000	407	0.19	0	PossibleInversion	12:71169000
14	PTPRR	12	71167500	PTPRR (Breakpoint)	-:12:70221000|-:12:71167500	361	0.23	0	PossibleInversion	12:70221000
14	PTPRR	12	70215000	PTPRR (Breakpoint)	+:12:70215000|+:12:71170500	288	0.11	0	PossibleInversion	12:71170500
14	PTPRR	12	57141000	PTPRR (Breakpoint)	-:12:57141000|-:12:71254500	154	0.2	0	PossibleInversion	12:71254500
14	PTPRR	12	56538000	PTPRR (Breakpoint)	+:12:56538000|-:12:71224500	277	0.26	0	PossibleLargeIndel	12:71224500
14	PTPRR	12	71193000	PTPRR (Breakpoint)	+:12:71193000|+:12:71166000	150	0.16	0	PossibleInversion	12:71166000
14	PTPRR	12	71257500	PTPRR (Breakpoint)	+:12:71257500|-:12:69750000	245	0.18	0	PossibleLargeIndel	12:69750000
14	PTPRR	12	71226000	PTPRR (Breakpoint)	-:12:87280500|+:12:71226000	288	0.27	0	PossibleLargeIndel	12:87280500
14	PTPRR	12	71188500	PTPRR (Breakpoint)	-:12:68301000|-:12:71188500	143	0.1	0	PossibleInversion	12:68301000
14	PTPRR	12	87273000	PTPRR (Breakpoint)	+:12:87273000|-:12:71302500	184	0.22	0	PossibleLargeIndel	12:71302500
14	PTPRR	12	62905500	PTPRR (Breakpoint)	+:12:62905500|-:12:71239500	229	0.37	0	PossibleLargeIndel	12:71239500
14	PTPRR	12	71304000	PTPRR (Breakpoint)	-:12:71164500|+:12:71304000	184	0.26	0	PossibleLargeIndel	12:71164500
14	PTPRR	12	71251500	PTPRR (Breakpoint)	+:12:71251500|-:12:70281000	170	0.27	0	PossibleLargeIndel	12:70281000
14	PTPRR	12	72114000	PTPRR (Breakpoint)	+:12:72114000|+:12:71227500	109	0.23	0	PossibleInversion	12:71227500
14	PTPRR	12	71229000	PTPRR (Breakpoint)	+:12:71229000|+:12:72112500	107	0.15	0	PossibleInversion	12:72112500
14	PTPRR	12	87276000	PTPRR (Breakpoint)	-:12:71304000|+:12:87276000	95	0.1	0	PossibleLargeIndel	12:71304000
14	PTPRR	12	57022500	PTPRR (Breakpoint)	+:12:57022500|-:12:71194500	51	0.1	0	PossibleLargeIndel	12:71194500
14	PTPRR_BAZ2A	12	57022500	PTPRR_BAZ2A (Breakpoint)	+:12:57022500|-:12:71194500	51	0.1	0	PossibleLargeIndel	12:71194500
14	PTPRR_ESYT1	12	56538000	PTPRR_ESYT1 (Breakpoint)	+:12:56538000|-:12:71224500	277	0.26	0	PossibleLargeIndel	12:71224500
14	PTPRR_MON2	12	62905500	PTPRR_MON2 (Breakpoint)	+:12:62905500|-:12:71239500	229	0.37	0	PossibleLargeIndel	12:71239500
14	PTPRR_MYRFL	12	71251500	PTPRR_MYRFL (Breakpoint)	+:12:71251500|-:12:70281000	170	0.27	0	PossibleLargeIndel	12:70281000
14	PTPRR_PRIM1	12	57141000	PTPRR_PRIM1 (Breakpoint)	-:12:57141000|-:12:71254500	154	0.2	0	PossibleInversion	12:71254500
14	RAB3IP	12	70215000	RAB3IP (Breakpoint)	+:12:70215000|+:12:71170500	288	0.11	0	PossibleInversion	12:71170500
14	RAI14	5	34752000	RAI14 (Breakpoint)	+:5:34752000|-:5:1338000	170	0.56	0	PossibleLargeIndel	5:1338000
14	RAI14	5	32020500	RAI14 (Breakpoint)	-:5:34705500|+:5:32020500	260	0.44	0	PossibleLargeIndel	5:34705500
14	RAI14	5	34755000	RAI14 (Breakpoint)	-:5:1339500|+:5:34755000	98	0.52	0	PossibleLargeIndel	5:1339500
14	RAI14	5	34752000	RAI14 (Breakpoint)	-:12:131556000|-:5:34752000	89	0.18	0	Translocation	12:131556000
14	RAI14	5	18166500	RAI14 (Breakpoint)	-:5:34764000|+:5:18166500	118	0.35	0	PossibleLargeIndel	5:34764000
14	RAI14	5	35947500	RAI14 (Breakpoint)	+:5:35947500|+:5:34831500	56	0.17	0	PossibleInversion	5:34831500
14	RAI14	12	131554500	RAI14 (Breakpoint)	-:5:34753500|-:12:131554500	34	0.16	0	Translocation	5:34753500
14	RAI14	12	132042000	RAI14 (Breakpoint)	+:12:132042000|-:5:34752000	29	0.17	0	Translocation	5:34752000
14	RAI14	5	34719000	RAI14 (Breakpoint)	-:5:2592000|+:5:34719000	46	0.21	0	PossibleLargeIndel	5:2592000
14	RAI14_CLPTM1L	5	34752000	RAI14_CLPTM1L (Breakpoint)	+:5:34752000|-:5:1338000	170	0.56	0	PossibleLargeIndel	5:1338000
14	RAI14_GPR133	5	34752000	RAI14_GPR133 (Breakpoint)	-:12:131556000|-:5:34752000	89	0.18	0	Translocation	12:131556000
14	RAI14_GPR133	12	131554500	RAI14_GPR133 (Breakpoint)	-:5:34753500|-:12:131554500	34	0.16	0	Translocation	5:34753500
14	RAI14_PDZD2	5	32020500	RAI14_PDZD2 (Breakpoint)	-:5:34705500|+:5:32020500	260	0.44	0	PossibleLargeIndel	5:34705500
14	RAP1B	12	69015000	RAP1B (Breakpoint)	-:12:69015000|-:12:71625000	374	0.16	0	PossibleInversion	12:71625000
14	RAP1B_TSPAN8	12	69015000	RAP1B_TSPAN8 (Breakpoint)	-:12:69015000|-:12:71625000	374	0.16	0	PossibleInversion	12:71625000
14	RBM19	12	114397500	RBM19 (Breakpoint)	+:12:114397500|-:12:114409500	201	0.26	0	PossibleLargeIndel	12:114409500
14	RBMS2	12	69621000	RBMS2 (Breakpoint)	+:12:69621000|-:12:56970000	135	0.26	0	PossibleLargeIndel	12:56970000
14	RBMS2	12	68194500	RBMS2 (Breakpoint)	-:12:56970000|+:12:68194500	85	0.15	0	PossibleLargeIndel	12:56970000
14	RFC1	4	39225000	RFC1 (Breakpoint)	+:4:39225000|-:4:39303000	30	0.1	0	PossibleLargeIndel	4:39303000
14	RFC1_WDR19	4	39225000	RFC1_WDR19 (Breakpoint)	+:4:39225000|-:4:39303000	30	0.1	0	PossibleLargeIndel	4:39303000
14	RILPL2	5	41493000	RILPL2 (Breakpoint)	+:5:41493000|-:12:123900000	68	0.2	0	Translocation	12:123900000
14	RILPL2	5	41496000	RILPL2 (Breakpoint)	-:12:123901500|+:5:41496000	58	0.21	0	Translocation	12:123901500
14	RILPL2	12	123910500	RILPL2 (Breakpoint)	+:12:123910500|-:12:123162000	108	0.34	0	PossibleLargeIndel	12:123162000
14	RILPL2_HCAR1	12	123910500	RILPL2_HCAR1 (Breakpoint)	+:12:123910500|-:12:123162000	108	0.34	0	PossibleLargeIndel	12:123162000
14	RILPL2_PLCXD3	5	41493000	RILPL2_PLCXD3 (Breakpoint)	+:5:41493000|-:12:123900000	68	0.2	0	Translocation	12:123900000
14	RNF4	4	2490000	RNF4 (Breakpoint)	-:4:12090000|+:4:2490000	26	0.1	0	PossibleLargeIndel	4:12090000
14	RPL6	12	112843500	RPL6 (Breakpoint)	+:12:112843500|+:12:111357000	101	0.25	0	PossibleInversion	12:111357000
14	RPL6_MYL2	12	112843500	RPL6_MYL2 (Breakpoint)	+:12:112843500|+:12:111357000	101	0.25	0	PossibleInversion	12:111357000
14	SLC15A4	12	81456000	SLC15A4 (Breakpoint)	+:12:81456000|-:12:129307500	266	0.35	0	PossibleLargeIndel	12:129307500
14	SLC15A4	12	81454500	SLC15A4 (Breakpoint)	-:12:129304500|+:12:81454500	307	0.36	0	PossibleLargeIndel	12:129304500
14	SLC15A4_ACSS3	12	81456000	SLC15A4_ACSS3 (Breakpoint)	+:12:81456000|-:12:129307500	266	0.35	0	PossibleLargeIndel	12:129307500
14	SLC35E3	12	69154500	SLC35E3 (Breakpoint)	-:12:61156500|-:12:69154500	242	0.1	0	PossibleInversion	12:61156500
14	SLC6A18	12	87780000	SLC6A18 (Breakpoint)	-:5:1236000|+:12:87780000	250	0.35	0	Translocation	5:1236000
14	SLC9A3	5	474000	SLC9A3 (Breakpoint)	-:12:78114000|-:5:474000	120	0.14	0	Translocation	12:78114000
14	SLC9A3	5	496500	SLC9A3 (Breakpoint)	+:5:496500|+:12:88435500	107	0.3	0	Translocation	12:88435500
14	SLC9A3	12	88435500	SLC9A3 (Breakpoint)	+:12:88435500|+:5:495000	66	0.19	0	Translocation	5:495000
14	SLC9A3	12	88437000	SLC9A3 (Breakpoint)	+:12:88437000|+:5:498000	26	0.22	0	Translocation	5:498000
14	SLC9A3_C12orf29	5	496500	SLC9A3_C12orf29 (Breakpoint)	+:5:496500|+:12:88435500	107	0.3	0	Translocation	12:88435500
14	SLC9A3_C12orf29	12	88435500	SLC9A3_C12orf29 (Breakpoint)	+:12:88435500|+:5:495000	66	0.19	0	Translocation	5:495000
14	SNAI1	20	48604500	SNAI1 (Breakpoint)	-:12:124956000|-:20:48604500	176	0.11	0	Translocation	12:124956000
14	SNAI1_NCOR2	20	48604500	SNAI1_NCOR2 (Breakpoint)	-:12:124956000|-:20:48604500	176	0.11	0	Translocation	12:124956000
14	SPEF2	5	35799000	SPEF2 (Breakpoint)	-:12:126976500|+:5:35799000	197	0.43	0	Translocation	12:126976500
14	SPEF2	5	35776500	SPEF2 (Breakpoint)	-:12:74356500|-:5:35776500	98	0.21	0	Translocation	12:74356500
14	SPEF2	5	35775000	SPEF2 (Breakpoint)	+:5:35775000|+:12:120294000	81	0.21	0	Translocation	12:120294000
14	SPEF2	12	74355000	SPEF2 (Breakpoint)	-:5:35776500|-:12:74355000	71	0.23	0	Translocation	5:35776500
14	SPEF2	5	35800500	SPEF2 (Breakpoint)	+:5:35800500|-:12:126979500	45	0.27	0	Translocation	12:126979500
14	SPEF2_CIT	5	35775000	SPEF2_CIT (Breakpoint)	+:5:35775000|+:12:120294000	81	0.21	0	Translocation	12:120294000
14	SRGAP1	12	64354500	SRGAP1 (Breakpoint)	-:12:58099500|+:12:64354500	683	0.35	0	PossibleLargeIndel	12:58099500
14	SRGAP1	12	71644500	SRGAP1 (Breakpoint)	+:12:71644500|-:12:64516500	441	0.25	0	PossibleLargeIndel	12:64516500
14	SRGAP1	12	64359000	SRGAP1 (Breakpoint)	+:12:64359000|-:12:66196500	277	0.13	0	PossibleLargeIndel	12:66196500
14	SRGAP1	12	64366500	SRGAP1 (Breakpoint)	-:12:68319000|+:12:64366500	378	0.26	0	PossibleLargeIndel	12:68319000
14	SRGAP1	12	69222000	SRGAP1 (Breakpoint)	-:12:64359000|+:12:69222000	315	0.22	0	PossibleLargeIndel	12:64359000
14	SRGAP1	12	56536500	SRGAP1 (Breakpoint)	-:12:64369500|-:12:56536500	154	0.3	0	PossibleInversion	12:64369500
14	SRGAP1	12	64368000	SRGAP1 (Breakpoint)	-:12:56536500|-:12:64368000	152	0.3	0	PossibleInversion	12:56536500
14	SRGAP1	12	69085500	SRGAP1 (Breakpoint)	+:12:69085500|-:12:64320000	291	0.15	0	PossibleLargeIndel	12:64320000
14	SRGAP1	12	64368000	SRGAP1 (Breakpoint)	+:12:64368000|-:12:64215000	206	0.14	0	PossibleLargeIndel	12:64215000
14	SRGAP1	12	58279500	SRGAP1 (Breakpoint)	+:12:58279500|-:12:64362000	227	0.27	0	PossibleLargeIndel	12:64362000
14	SRGAP1	12	72682500	SRGAP1 (Breakpoint)	-:12:64363500|-:12:72682500	95	0.13	0	PossibleInversion	12:64363500
14	SRGAP1	12	64356000	SRGAP1 (Breakpoint)	+:12:64356000|-:12:69621000	161	0.22	0	PossibleLargeIndel	12:69621000
14	SRGAP1	12	64357500	SRGAP1 (Breakpoint)	+:12:64357500|-:12:68194500	57	0.12	0	PossibleLargeIndel	12:68194500
14	SRGAP1	12	64371000	SRGAP1 (Breakpoint)	+:12:64371000|-:12:58308000	22	0.1	0	PossibleLargeIndel	12:58308000
14	SRGAP1_ESYT1	12	56536500	SRGAP1_ESYT1 (Breakpoint)	-:12:64369500|-:12:56536500	154	0.3	0	PossibleInversion	12:64369500
14	SRGAP1_ESYT1	12	64368000	SRGAP1_ESYT1 (Breakpoint)	-:12:56536500|-:12:64368000	152	0.3	0	PossibleInversion	12:56536500
14	SRGAP1_MDM2	12	69222000	SRGAP1_MDM2 (Breakpoint)	-:12:64359000|+:12:69222000	315	0.22	0	PossibleLargeIndel	12:64359000
14	SRGAP1_NUP107	12	69085500	SRGAP1_NUP107 (Breakpoint)	+:12:69085500|-:12:64320000	291	0.15	0	PossibleLargeIndel	12:64320000
14	SRGAP1_OS9	12	64354500	SRGAP1_OS9 (Breakpoint)	-:12:58099500|+:12:64354500	683	0.35	0	PossibleLargeIndel	12:58099500
14	SRGAP1_TRHDE	12	72682500	SRGAP1_TRHDE (Breakpoint)	-:12:64363500|-:12:72682500	95	0.13	0	PossibleInversion	12:64363500
14	SRGAP1_TSPAN8	12	71644500	SRGAP1_TSPAN8 (Breakpoint)	+:12:71644500|-:12:64516500	441	0.25	0	PossibleLargeIndel	12:64516500
14	SSH1	12	90634500	SSH1 (Breakpoint)	+:12:90634500|-:12:109219500	72	0.14	0	PossibleLargeIndel	12:109219500
14	SSH1	12	90633000	SSH1 (Breakpoint)	-:12:109216500|+:12:90633000	67	0.21	0	PossibleLargeIndel	12:109216500
14	STAB2	12	95782500	STAB2 (Breakpoint)	+:12:95782500|-:12:104103000	143	0.32	0	PossibleLargeIndel	12:104103000
14	STAB2	12	110893500	STAB2 (Breakpoint)	+:12:110893500|+:12:104137500	67	0.19	0	PossibleInversion	12:104137500
14	STAB2	12	104139000	STAB2 (Breakpoint)	+:12:104139000|+:12:110895000	60	0.29	0	PossibleInversion	12:110895000
14	STAB2_GPN3	12	110893500	STAB2_GPN3 (Breakpoint)	+:12:110893500|+:12:104137500	67	0.19	0	PossibleInversion	12:104137500
14	STAB2_GPN3	12	104139000	STAB2_GPN3 (Breakpoint)	+:12:104139000|+:12:110895000	60	0.29	0	PossibleInversion	12:110895000
14	STAT6	12	111270000	STAT6 (Breakpoint)	+:12:111270000|+:12:57499500	418	0.26	0	PossibleInversion	12:57499500
14	STAT6	12	57493500	STAT6 (Breakpoint)	-:12:111301500|-:12:57493500	288	0.17	0	PossibleInversion	12:111301500
14	STAT6	12	111300000	STAT6 (Breakpoint)	-:12:57493500|-:12:111300000	273	0.28	0	PossibleInversion	12:57493500
14	STAT6_CCDC63	12	57493500	STAT6_CCDC63 (Breakpoint)	-:12:111301500|-:12:57493500	288	0.17	0	PossibleInversion	12:111301500
14	STAT6_CCDC63	12	111300000	STAT6_CCDC63 (Breakpoint)	-:12:57493500|-:12:111300000	273	0.28	0	PossibleInversion	12:57493500
14	SUOX	12	56397000	SUOX (Breakpoint)	-:12:71380500|+:12:56397000	680	0.42	0	PossibleLargeIndel	12:71380500
14	SUOX	12	56397000	SUOX (Breakpoint)	-:12:56397000|-:12:70120500	264	0.13	0	PossibleInversion	12:70120500
14	SUOX	12	56394000	SUOX (Breakpoint)	-:5:37341000|+:12:56394000	239	0.1	0	Translocation	5:37341000
14	SUOX	12	62808000	SUOX (Breakpoint)	-:12:56391000|+:12:62808000	70	0.1	0	PossibleLargeIndel	12:56391000
14	SUOX_NUP155	12	56394000	SUOX_NUP155 (Breakpoint)	-:5:37341000|+:12:56394000	239	0.1	0	Translocation	5:37341000
14	SUOX_USP15	12	62808000	SUOX_USP15 (Breakpoint)	-:12:56391000|+:12:62808000	70	0.1	0	PossibleLargeIndel	12:56391000
14	TAOK3	12	121815000	TAOK3 (Breakpoint)	+:12:121815000|+:12:118806000	77	0.3	0	PossibleInversion	12:118806000
14	TAOK3	12	118807500	TAOK3 (Breakpoint)	+:12:118807500|+:12:121816500	43	0.27	0	PossibleInversion	12:121816500
14	TAOK3	12	118806000	TAOK3 (Breakpoint)	+:12:118806000|+:12:121813500	36	0.16	0	PossibleInversion	12:121813500
14	TAOK3_ANAPC5	12	121815000	TAOK3_ANAPC5 (Breakpoint)	+:12:121815000|+:12:118806000	77	0.3	0	PossibleInversion	12:118806000
14	TAOK3_ANAPC5	12	118807500	TAOK3_ANAPC5 (Breakpoint)	+:12:118807500|+:12:121816500	43	0.27	0	PossibleInversion	12:121816500
14	TBC1D14	4	6222000	TBC1D14 (Breakpoint)	+:4:6222000|-:4:6975000	75	0.21	0	PossibleLargeIndel	4:6975000
14	TBC1D30	5	37315500	TBC1D30 (Breakpoint)	-:12:65272500|-:5:37315500	724	0.24	0	Translocation	12:65272500
14	TBC1D30	12	65271000	TBC1D30 (Breakpoint)	-:5:37315500|-:12:65271000	384	0.3	0	Translocation	5:37315500
14	TBC1D30_NUP155	5	37315500	TBC1D30_NUP155 (Breakpoint)	-:12:65272500|-:5:37315500	724	0.24	0	Translocation	12:65272500
14	TBC1D30_NUP155	12	65271000	TBC1D30_NUP155 (Breakpoint)	-:5:37315500|-:12:65271000	384	0.3	0	Translocation	5:37315500
14	TBK1	12	64848000	TBK1 (Breakpoint)	+:12:64848000|+:12:66339000	263	0.12	0	PossibleInversion	12:66339000
14	TBK1	12	69897000	TBK1 (Breakpoint)	-:12:64866000|-:12:69897000	258	0.15	0	PossibleInversion	12:64866000
14	TBK1	12	64869000	TBK1 (Breakpoint)	-:12:69991500|+:12:64869000	460	0.22	0	PossibleLargeIndel	12:69991500
14	TBK1	12	64864500	TBK1 (Breakpoint)	-:12:69897000|-:12:64864500	245	0.23	0	PossibleInversion	12:69897000
14	TBK1	12	66340500	TBK1 (Breakpoint)	+:12:66340500|+:12:64846500	204	0.11	0	PossibleInversion	12:64846500
14	TBK1	12	64849500	TBK1 (Breakpoint)	+:12:64849500|+:12:66342000	191	0.33	0	PossibleInversion	12:66342000
14	TBK1	12	62806500	TBK1 (Breakpoint)	-:12:64861500|+:12:62806500	114	0.21	0	PossibleLargeIndel	12:64861500
14	TBK1	12	64863000	TBK1 (Breakpoint)	+:12:64863000|-:12:69892500	172	0.16	0	PossibleLargeIndel	12:69892500
14	TBK1	12	62808000	TBK1 (Breakpoint)	+:12:62808000|-:12:64864500	87	0.16	0	PossibleLargeIndel	12:64864500
14	TBK1_CCT2	12	64869000	TBK1_CCT2 (Breakpoint)	-:12:69991500|+:12:64869000	460	0.22	0	PossibleLargeIndel	12:69991500
14	TBK1_FRS2	12	69897000	TBK1_FRS2 (Breakpoint)	-:12:64866000|-:12:69897000	258	0.15	0	PossibleInversion	12:64866000
14	TBK1_FRS2	12	64864500	TBK1_FRS2 (Breakpoint)	-:12:69897000|-:12:64864500	245	0.23	0	PossibleInversion	12:69897000
14	TBK1_HMGA2	12	64848000	TBK1_HMGA2 (Breakpoint)	+:12:64848000|+:12:66339000	263	0.12	0	PossibleInversion	12:66339000
14	TBK1_HMGA2	12	66340500	TBK1_HMGA2 (Breakpoint)	+:12:66340500|+:12:64846500	204	0.11	0	PossibleInversion	12:64846500
14	TBK1_USP15	12	62806500	TBK1_USP15 (Breakpoint)	-:12:64861500|+:12:62806500	114	0.21	0	PossibleLargeIndel	12:64861500
14	TIMELESS	12	71386500	TIMELESS (Breakpoint)	+:12:71386500|+:12:56811000	68	0.21	0	PossibleInversion	12:56811000
14	TMBIM4	12	66549000	TMBIM4 (Breakpoint)	-:20:50373000|-:12:66549000	404	0.12	0	Translocation	20:50373000
14	TMBIM4	20	50371500	TMBIM4 (Breakpoint)	-:12:66549000|-:20:50371500	257	0.1	0	Translocation	12:66549000
14	TMBIM4_ATP9A	12	66549000	TMBIM4_ATP9A (Breakpoint)	-:20:50373000|-:12:66549000	404	0.12	0	Translocation	20:50373000
14	TMBIM4_ATP9A	20	50371500	TMBIM4_ATP9A (Breakpoint)	-:12:66549000|-:20:50371500	257	0.1	0	Translocation	12:66549000
14	TMEM132C	12	128986500	TMEM132C (Breakpoint)	-:20:49006500|+:12:128986500	598	0.2	0	Translocation	20:49006500
14	TMEM132C	12	128988000	TMEM132C (Breakpoint)	+:12:128988000|-:20:49009500	410	0.18	0	Translocation	20:49009500
14	TMEM132C	12	129121500	TMEM132C (Breakpoint)	+:12:129121500|-:12:61854000	578	0.26	0	PossibleLargeIndel	12:61854000
14	TMEM132C	12	70000500	TMEM132C (Breakpoint)	+:12:70000500|-:12:129105000	321	0.15	0	PossibleLargeIndel	12:129105000
14	TMEM132C	12	70003500	TMEM132C (Breakpoint)	-:12:129106500|+:12:70003500	245	0.12	0	PossibleLargeIndel	12:129106500
14	TMEM132C	12	129186000	TMEM132C (Breakpoint)	+:12:129186000|+:12:61557000	236	0.19	0	PossibleInversion	12:61557000
14	TMEM132C	12	61558500	TMEM132C (Breakpoint)	+:12:61558500|+:12:129184500	235	0.16	0	PossibleInversion	12:129184500
14	TMEM132C	12	128890500	TMEM132C (Breakpoint)	+:12:128890500|-:20:50047500	377	0.12	0	Translocation	20:50047500
14	TMEM132C	12	61012500	TMEM132C (Breakpoint)	+:12:61012500|-:12:129040500	379	0.18	0	PossibleLargeIndel	12:129040500
14	TMEM132C	12	129075000	TMEM132C (Breakpoint)	+:12:129075000|-:12:124878000	359	0.24	0	PossibleLargeIndel	12:124878000
14	TMEM132C	12	67272000	TMEM132C (Breakpoint)	+:12:67272000|+:12:129099000	184	0.14	0	PossibleInversion	12:129099000
14	TMEM132C	12	129100500	TMEM132C (Breakpoint)	+:12:129100500|+:12:67270500	182	0.12	0	PossibleInversion	12:67270500
14	TMEM132C	12	62904000	TMEM132C (Breakpoint)	-:12:129099000|+:12:62904000	358	0.27	0	PossibleLargeIndel	12:129099000
14	TMEM132C	5	38292000	TMEM132C (Breakpoint)	-:12:128880000|-:5:38292000	178	0.12	0	Translocation	12:128880000
14	TMEM132C	5	38257500	TMEM132C (Breakpoint)	-:12:128805000|+:5:38257500	310	0.22	0	Translocation	12:128805000
14	TMEM132C	12	128871000	TMEM132C (Breakpoint)	-:12:115512000|+:12:128871000	135	0.1	0	PossibleLargeIndel	12:115512000
14	TMEM132C	12	129000000	TMEM132C (Breakpoint)	-:12:61027500|+:12:129000000	118	0.12	0	PossibleLargeIndel	12:61027500
14	TMEM132C	20	48933000	TMEM132C (Breakpoint)	+:20:48933000|-:12:129006000	133	0.11	0	Translocation	12:129006000
14	TMEM132C_EGFLAM	5	38292000	TMEM132C_EGFLAM (Breakpoint)	-:12:128880000|-:5:38292000	178	0.12	0	Translocation	12:128880000
14	TMEM132C_LRRC10	12	70003500	TMEM132C_LRRC10 (Breakpoint)	-:12:129106500|+:12:70003500	245	0.12	0	PossibleLargeIndel	12:129106500
14	TMEM132C_MON2	12	62904000	TMEM132C_MON2 (Breakpoint)	-:12:129099000|+:12:62904000	358	0.27	0	PossibleLargeIndel	12:129099000
14	TMEM132C_NCOR2	12	129075000	TMEM132C_NCOR2 (Breakpoint)	+:12:129075000|-:12:124878000	359	0.24	0	PossibleLargeIndel	12:124878000
14	TMEM132C_NFATC2	12	128890500	TMEM132C_NFATC2 (Breakpoint)	+:12:128890500|-:20:50047500	377	0.12	0	Translocation	20:50047500
14	TMEM132D	12	129954000	TMEM132D (Breakpoint)	-:12:132606000|+:12:129954000	456	0.35	0	PossibleLargeIndel	12:132606000
14	TMEM132D	12	83908500	TMEM132D (Breakpoint)	-:12:83908500|-:12:129685500	305	0.16	0	PossibleInversion	12:129685500
14	TMEM132D	12	129900000	TMEM132D (Breakpoint)	+:12:129900000|+:12:129520500	311	0.13	0	PossibleInversion	12:129520500
14	TMEM132D	12	129973500	TMEM132D (Breakpoint)	-:12:132585000|-:12:129973500	254	0.23	0	PossibleInversion	12:132585000
14	TMEM132D	12	132652500	TMEM132D (Breakpoint)	+:12:132652500|+:12:129925500	206	0.25	0	PossibleInversion	12:129925500
14	TMEM132D	12	132588000	TMEM132D (Breakpoint)	+:12:132588000|-:12:129927000	385	0.43	0	PossibleLargeIndel	12:129927000
14	TMEM132D	12	132586500	TMEM132D (Breakpoint)	-:12:129975000|-:12:132586500	190	0.2	0	PossibleInversion	12:129975000
14	TMEM132D	12	129955500	TMEM132D (Breakpoint)	+:12:129955500|-:12:132609000	179	0.18	0	PossibleLargeIndel	12:132609000
14	TMEM132D	12	129976500	TMEM132D (Breakpoint)	+:12:129976500|+:5:32253000	171	0.55	0	Translocation	5:32253000
14	TMEM132D	5	32253000	TMEM132D (Breakpoint)	+:5:32253000|+:12:129973500	171	0.3	0	Translocation	12:129973500
14	TMEM132D	12	129925500	TMEM132D (Breakpoint)	+:12:129925500|+:12:132651000	166	0.14	0	PossibleInversion	12:132651000
14	TMEM132D	12	132583500	TMEM132D (Breakpoint)	-:12:129973500|-:12:132583500	58	0.11	0	PossibleInversion	12:129973500
14	TMEM132D	12	129927000	TMEM132D (Breakpoint)	+:12:129927000|+:12:132654000	41	0.16	0	PossibleInversion	12:132654000
14	TMEM132D_EP400NL	12	129954000	TMEM132D_EP400NL (Breakpoint)	-:12:132606000|+:12:129954000	456	0.35	0	PossibleLargeIndel	12:132606000
14	TMEM132D_EP400NL	12	132588000	TMEM132D_EP400NL (Breakpoint)	+:12:132588000|-:12:129927000	385	0.43	0	PossibleLargeIndel	12:129927000
14	TMEM132D_MTMR12	12	129976500	TMEM132D_MTMR12 (Breakpoint)	+:12:129976500|+:5:32253000	171	0.55	0	Translocation	5:32253000
14	TMEM132D_MTMR12	5	32253000	TMEM132D_MTMR12 (Breakpoint)	+:5:32253000|+:12:129973500	171	0.3	0	Translocation	12:129973500
14	TMEM189	20	49099500	TMEM189 (Breakpoint)	+:20:49099500|+:20:48747000	388	0.14	0	PossibleInversion	20:48747000
14	TMEM189	20	48748500	TMEM189 (Breakpoint)	+:20:48748500|+:20:49101000	163	0.1	0	PossibleInversion	20:49101000
14	TMEM189-UBE2V1	20	49099500	TMEM189-UBE2V1 (Breakpoint)	+:20:49099500|+:20:48747000	388	0.14	0	PossibleInversion	20:48747000
14	TMEM189-UBE2V1	20	48748500	TMEM189-UBE2V1 (Breakpoint)	+:20:48748500|+:20:49101000	163	0.1	0	PossibleInversion	20:49101000
14	TMEM5	12	67353000	TMEM5 (Breakpoint)	-:12:64200000|+:12:67353000	399	0.19	0	PossibleLargeIndel	12:64200000
14	TMEM5	12	64203000	TMEM5 (Breakpoint)	-:12:58278000|+:12:64203000	274	0.19	0	PossibleLargeIndel	12:58278000
14	TMEM5	12	67453500	TMEM5 (Breakpoint)	+:12:67453500|-:12:64198500	270	0.17	0	PossibleLargeIndel	12:64198500
14	TMEM5	12	64198500	TMEM5 (Breakpoint)	+:12:64198500|-:12:69952500	193	0.11	0	PossibleLargeIndel	12:69952500
14	TMEM5_FRS2	12	64198500	TMEM5_FRS2 (Breakpoint)	+:12:64198500|-:12:69952500	193	0.11	0	PossibleLargeIndel	12:69952500
14	TPH2	12	72340500	TPH2 (Breakpoint)	-:12:58135500|-:12:72340500	207	0.12	0	PossibleInversion	12:58135500
14	TPH2	12	72468000	TPH2 (Breakpoint)	+:12:72468000|-:12:69451500	181	0.12	0	PossibleLargeIndel	12:69451500
14	TPH2	12	81235500	TPH2 (Breakpoint)	+:12:81235500|-:12:72564000	165	0.25	0	PossibleLargeIndel	12:72564000
14	TPH2	12	72576000	TPH2 (Breakpoint)	-:12:81093000|+:12:72576000	74	0.17	0	PossibleLargeIndel	12:81093000
14	TPH2	12	72574500	TPH2 (Breakpoint)	+:12:72574500|-:12:81091500	59	0.18	0	PossibleLargeIndel	12:81091500
14	TRHDE	12	70266000	TRHDE (Breakpoint)	-:12:72678000|+:12:70266000	648	0.4	0	PossibleLargeIndel	12:72678000
14	TRHDE	12	72733500	TRHDE (Breakpoint)	-:12:64132500|-:12:72733500	323	0.19	0	PossibleInversion	12:64132500
14	TRHDE	12	72691500	TRHDE (Breakpoint)	-:12:58281000|+:12:72691500	383	0.59	0	PossibleLargeIndel	12:58281000
14	TRHDE	12	87276000	TRHDE (Breakpoint)	-:12:87276000|-:12:72691500	184	0.21	0	PossibleInversion	12:72691500
14	TRHDE	12	72681000	TRHDE (Breakpoint)	-:12:58306500|+:12:72681000	160	0.23	0	PossibleLargeIndel	12:58306500
14	TRHDE	12	81235500	TRHDE (Breakpoint)	+:12:81235500|-:12:72564000	165	0.25	0	PossibleLargeIndel	12:72564000
14	TRHDE	12	72681000	TRHDE (Breakpoint)	-:12:58296000|+:12:72681000	195	0.2	0	PossibleLargeIndel	12:58296000
14	TRHDE	12	58279500	TRHDE (Breakpoint)	+:12:58279500|+:12:72682500	95	0.15	0	PossibleInversion	12:72682500
14	TRHDE	12	72682500	TRHDE (Breakpoint)	-:12:64363500|-:12:72682500	95	0.13	0	PossibleInversion	12:64363500
14	TRHDE	12	72681000	TRHDE (Breakpoint)	+:12:72681000|+:12:64701000	81	0.16	0	PossibleInversion	12:64701000
14	TRHDE	12	72576000	TRHDE (Breakpoint)	-:12:81093000|+:12:72576000	74	0.17	0	PossibleLargeIndel	12:81093000
14	TRHDE	12	72574500	TRHDE (Breakpoint)	+:12:72574500|-:12:81091500	59	0.18	0	PossibleLargeIndel	12:81091500
14	TRHDE	12	64702500	TRHDE (Breakpoint)	+:12:64702500|+:12:72682500	58	0.2	0	PossibleInversion	12:72682500
14	TRHDE	12	70267500	TRHDE (Breakpoint)	+:12:70267500|-:12:72681000	57	0.1	0	PossibleLargeIndel	12:72681000
14	TRHDE	12	72682500	TRHDE (Breakpoint)	+:12:72682500|-:12:58309500	55	0.21	0	PossibleLargeIndel	12:58309500
14	TRHDE_C12orf56	12	72681000	TRHDE_C12orf56 (Breakpoint)	+:12:72681000|+:12:64701000	81	0.16	0	PossibleInversion	12:64701000
14	TRHDE_C12orf56	12	64702500	TRHDE_C12orf56 (Breakpoint)	+:12:64702500|+:12:72682500	58	0.2	0	PossibleInversion	12:72682500
14	TRHDE_MYRFL	12	70266000	TRHDE_MYRFL (Breakpoint)	-:12:72678000|+:12:70266000	648	0.4	0	PossibleLargeIndel	12:72678000
14	TRHDE_SRGAP1	12	72682500	TRHDE_SRGAP1 (Breakpoint)	-:12:64363500|-:12:72682500	95	0.13	0	PossibleInversion	12:64363500
14	TSPAN31	12	72340500	TSPAN31 (Breakpoint)	-:12:58135500|-:12:72340500	207	0.12	0	PossibleInversion	12:58135500
14	TSPAN8	12	69015000	TSPAN8 (Breakpoint)	-:12:69015000|-:12:71625000	374	0.16	0	PossibleInversion	12:71625000
14	TSPAN8	12	71644500	TSPAN8 (Breakpoint)	+:12:71644500|-:12:64516500	441	0.25	0	PossibleLargeIndel	12:64516500
14	TSPAN8	12	71623500	TSPAN8 (Breakpoint)	-:5:32008500|+:12:71623500	96	0.19	0	Translocation	5:32008500
14	TSPAN8	20	48420000	TSPAN8 (Breakpoint)	-:12:71760000|+:20:48420000	69	0.14	0	Translocation	12:71760000
14	TSPAN8	12	71590500	TSPAN8 (Breakpoint)	-:12:63877500|+:12:71590500	44	0.13	0	PossibleLargeIndel	12:63877500
14	TSPAN8_PDZD2	12	71623500	TSPAN8_PDZD2 (Breakpoint)	-:5:32008500|+:12:71623500	96	0.19	0	Translocation	5:32008500
14	TSPAN8_RAP1B	12	69015000	TSPAN8_RAP1B (Breakpoint)	-:12:69015000|-:12:71625000	374	0.16	0	PossibleInversion	12:71625000
14	TSPAN8_SRGAP1	12	71644500	TSPAN8_SRGAP1 (Breakpoint)	+:12:71644500|-:12:64516500	441	0.25	0	PossibleLargeIndel	12:64516500
14	UBE3B	12	118540500	UBE3B (Breakpoint)	+:12:118540500|+:12:109966500	73	0.18	0	PossibleInversion	12:109966500
14	UBE3B	12	133402500	UBE3B (Breakpoint)	-:12:109954500|-:12:133402500	69	0.18	0	PossibleInversion	12:109954500
14	UBE3B	12	109956000	UBE3B (Breakpoint)	-:12:133404000|-:12:109956000	64	0.15	0	PossibleInversion	12:133404000
14	UBE3B_VSIG10	12	118540500	UBE3B_VSIG10 (Breakpoint)	+:12:118540500|+:12:109966500	73	0.18	0	PossibleInversion	12:109966500
14	USP15	12	62706000	USP15 (Breakpoint)	-:12:62706000|-:12:66574500	162	0.1	0	PossibleInversion	12:66574500
14	USP15	12	62712000	USP15 (Breakpoint)	+:12:62712000|-:12:67053000	240	0.22	0	PossibleLargeIndel	12:67053000
14	USP15	12	66228000	USP15 (Breakpoint)	+:12:66228000|-:12:62809500	239	0.14	0	PossibleLargeIndel	12:62809500
14	USP15	12	62806500	USP15 (Breakpoint)	-:12:64861500|+:12:62806500	114	0.21	0	PossibleLargeIndel	12:64861500
14	USP15	12	62808000	USP15 (Breakpoint)	+:12:62808000|-:12:64864500	87	0.16	0	PossibleLargeIndel	12:64864500
14	USP15	12	62655000	USP15 (Breakpoint)	+:12:62655000|+:12:66577500	81	0.1	0	PossibleInversion	12:66577500
14	USP15	20	48132000	USP15 (Breakpoint)	-:12:62769000|+:20:48132000	105	0.27	0	Translocation	12:62769000
14	USP15	12	62809500	USP15 (Breakpoint)	+:12:62809500|-:12:70294500	149	0.28	0	PossibleLargeIndel	12:70294500
14	USP15	20	48133500	USP15 (Breakpoint)	+:20:48133500|-:12:62772000	50	0.15	0	Translocation	12:62772000
14	USP15	12	62808000	USP15 (Breakpoint)	-:12:56391000|+:12:62808000	70	0.1	0	PossibleLargeIndel	12:56391000
14	USP15_GRIP1	12	62712000	USP15_GRIP1 (Breakpoint)	+:12:62712000|-:12:67053000	240	0.22	0	PossibleLargeIndel	12:67053000
14	USP15_HMGA2	12	66228000	USP15_HMGA2 (Breakpoint)	+:12:66228000|-:12:62809500	239	0.14	0	PossibleLargeIndel	12:62809500
14	USP15_MYRFL	12	62809500	USP15_MYRFL (Breakpoint)	+:12:62809500|-:12:70294500	149	0.28	0	PossibleLargeIndel	12:70294500
14	USP15_PTGIS	20	48132000	USP15_PTGIS (Breakpoint)	-:12:62769000|+:20:48132000	105	0.27	0	Translocation	12:62769000
14	USP15_SUOX	12	62808000	USP15_SUOX (Breakpoint)	-:12:56391000|+:12:62808000	70	0.1	0	PossibleLargeIndel	12:56391000
14	USP15_TBK1	12	62806500	USP15_TBK1 (Breakpoint)	-:12:64861500|+:12:62806500	114	0.21	0	PossibleLargeIndel	12:64861500
14	VSIG10	12	118540500	VSIG10 (Breakpoint)	+:12:118540500|+:12:109966500	73	0.18	0	PossibleInversion	12:109966500
14	VSIG10	12	118539000	VSIG10 (Breakpoint)	-:5:32208000|-:12:118539000	55	0.17	0	Translocation	5:32208000
14	VSIG10	12	118915500	VSIG10 (Breakpoint)	-:12:118543500|-:12:118915500	38	0.13	0	PossibleInversion	12:118543500
14	VSIG10	12	118542000	VSIG10 (Breakpoint)	-:12:118917000|-:12:118542000	30	0.1	0	PossibleInversion	12:118917000
14	VSIG10_UBE3B	12	118540500	VSIG10_UBE3B (Breakpoint)	+:12:118540500|+:12:109966500	73	0.18	0	PossibleInversion	12:109966500
14	WDR19	4	39225000	WDR19 (Breakpoint)	+:4:39225000|-:4:39303000	30	0.1	0	PossibleLargeIndel	4:39303000
14	WDR19_RFC1	4	39225000	WDR19_RFC1 (Breakpoint)	+:4:39225000|-:4:39303000	30	0.1	0	PossibleLargeIndel	4:39303000
14	WDR70	5	37680000	WDR70 (Breakpoint)	+:5:37680000|+:12:85053000	419	0.16	0	Translocation	12:85053000
14	WDR70	5	37594500	WDR70 (Breakpoint)	-:5:37594500|-:12:115549500	313	0.15	0	Translocation	12:115549500
14	WDR70	5	37408500	WDR70 (Breakpoint)	+:5:37408500|-:12:129498000	374	0.17	0	Translocation	12:129498000
14	WDR70	5	38128500	WDR70 (Breakpoint)	-:5:38128500|-:5:37569000	216	0.12	0	PossibleInversion	5:37569000
14	WDR70	5	37411500	WDR70 (Breakpoint)	-:12:129499500|+:5:37411500	193	0.1	0	Translocation	12:129499500
14	WDR70	5	37576500	WDR70 (Breakpoint)	+:5:37576500|+:12:68826000	139	0.12	0	Translocation	12:68826000
14	WDR70	5	37576500	WDR70 (Breakpoint)	+:5:37576500|-:20:48904500	237	0.17	0	Translocation	20:48904500
14	WIBG	12	78901500	WIBG (Breakpoint)	+:12:78901500|-:12:56311500	126	0.19	0	PossibleLargeIndel	12:56311500
14	YEATS4	12	69756000	YEATS4 (Breakpoint)	-:12:63313500|+:12:69756000	148	0.14	0	PossibleLargeIndel	12:63313500
14	YEATS4	12	69754500	YEATS4 (Breakpoint)	+:12:69754500|-:12:63312000	142	0.16	0	PossibleLargeIndel	12:63312000
14	YEATS4_PPM1H	12	69756000	YEATS4_PPM1H (Breakpoint)	-:12:63313500|+:12:69756000	148	0.14	0	PossibleLargeIndel	12:63313500
14	ZFP64	20	50340000	ZFP64 (Breakpoint)	-:20:50739000|+:20:50340000	890	0.18	0	PossibleLargeIndel	20:50739000
14	ZFP64_ATP9A	20	50340000	ZFP64_ATP9A (Breakpoint)	-:20:50739000|+:20:50340000	890	0.18	0	PossibleLargeIndel	20:50739000
14	ZFR	5	32026500	ZFR (Breakpoint)	+:5:32026500|+:5:32362500	97	0.17	0	PossibleInversion	5:32362500
14	ZFR	5	32364000	ZFR (Breakpoint)	+:5:32364000|+:5:32025000	91	0.2	0	PossibleInversion	5:32025000
14	ZFR	5	32365500	ZFR (Breakpoint)	+:5:32365500|+:5:32028000	44	0.21	0	PossibleInversion	5:32028000
14	ZFR_PDZD2	5	32026500	ZFR_PDZD2 (Breakpoint)	+:5:32026500|+:5:32362500	97	0.17	0	PossibleInversion	5:32362500
14	ZFR_PDZD2	5	32364000	ZFR_PDZD2 (Breakpoint)	+:5:32364000|+:5:32025000	91	0.2	0	PossibleInversion	5:32025000
14	ZFYVE28	4	2298000	ZFYVE28 (Breakpoint)	-:4:4131000|+:4:2298000	75	0.24	0	PossibleLargeIndel	4:4131000
14	ZNF516	18	74080500	ZNF516 (Breakpoint)	-:18:63615000|-:18:74080500	38	0.25	0	PossibleInversion	18:63615000
14	ZNF516	18	63613500	ZNF516 (Breakpoint)	-:18:74080500|-:18:63613500	33	0.28	0	PossibleInversion	18:74080500
17	ADCY2	5	7413000	ADCY2 (Breakpoint)	-:5:1323000|-:5:7413000	65	0.14	0	PossibleInversion	5:1323000
17	ADCY2	5	1324500	ADCY2 (Breakpoint)	-:5:7414500|-:5:1324500	56	0.12	0	PossibleInversion	5:7414500
17	ADCY2	1	12627000	ADCY2 (Breakpoint)	+:1:12627000|+:5:7413000	50	0.19	0	Translocation	5:7413000
17	ADCY2	5	7413000	ADCY2 (Breakpoint)	+:5:7413000|+:1:12625500	45	0.19	0	Translocation	1:12625500
17	ADCY2_CLPTM1L	5	7413000	ADCY2_CLPTM1L (Breakpoint)	-:5:1323000|-:5:7413000	65	0.14	0	PossibleInversion	5:1323000
17	ADCY2_CLPTM1L	5	1324500	ADCY2_CLPTM1L (Breakpoint)	-:5:7414500|-:5:1324500	56	0.12	0	PossibleInversion	5:7414500
17	ANKRD13C	1	70797000	ANKRD13C (Breakpoint)	+:1:70797000|-:1:8115000	41	0.1	0	PossibleLargeIndel	1:8115000
17	C1orf168	1	57234000	C1orf168 (Breakpoint)	-:1:7626000|+:1:57234000	55	0.19	0	PossibleLargeIndel	1:7626000
17	C1orf168_CAMTA1	1	57234000	C1orf168_CAMTA1 (Breakpoint)	-:1:7626000|+:1:57234000	55	0.19	0	PossibleLargeIndel	1:7626000
17	CAMTA1	1	53088000	CAMTA1 (Breakpoint)	+:1:53088000|-:1:7735500	111	0.2	0	PossibleLargeIndel	1:7735500
17	CAMTA1	1	7686000	CAMTA1 (Breakpoint)	+:1:7686000|+:5:33081000	74	0.22	0	Translocation	5:33081000
17	CAMTA1	5	33082500	CAMTA1 (Breakpoint)	+:5:33082500|+:1:7684500	74	0.23	0	Translocation	1:7684500
17	CAMTA1	5	1249500	CAMTA1 (Breakpoint)	-:1:7749000|-:5:1249500	72	0.15	0	Translocation	1:7749000
17	CAMTA1	1	7747500	CAMTA1 (Breakpoint)	-:5:1251000|-:1:7747500	71	0.13	0	Translocation	5:1251000
17	CAMTA1	1	7749000	CAMTA1 (Breakpoint)	+:1:7749000|+:1:45804000	64	0.1	0	PossibleInversion	1:45804000
17	CAMTA1	1	45805500	CAMTA1 (Breakpoint)	+:1:45805500|+:1:7747500	64	0.13	0	PossibleInversion	1:7747500
17	CAMTA1	1	53091000	CAMTA1 (Breakpoint)	-:1:7737000|+:1:53091000	63	0.15	0	PossibleLargeIndel	1:7737000
17	CAMTA1	1	57234000	CAMTA1 (Breakpoint)	-:1:7626000|+:1:57234000	55	0.19	0	PossibleLargeIndel	1:7626000
17	CAMTA1_C1orf168	1	57234000	CAMTA1_C1orf168 (Breakpoint)	-:1:7626000|+:1:57234000	55	0.19	0	PossibleLargeIndel	1:7626000
17	CAMTA1_MUTYH	1	7749000	CAMTA1_MUTYH (Breakpoint)	+:1:7749000|+:1:45804000	64	0.1	0	PossibleInversion	1:45804000
17	CHD5	1	6177000	CHD5 (Breakpoint)	-:5:2635500|+:1:6177000	55	0.22	0	Translocation	5:2635500
17	CLIC4	1	25150500	CLIC4 (Breakpoint)	+:1:25150500|+:1:48336000	31	0.1	0	PossibleInversion	1:48336000
17	CLIC4	1	48337500	CLIC4 (Breakpoint)	+:1:48337500|+:1:25149000	31	0.12	0	PossibleInversion	1:25149000
17	CLIC4_TRABD2B	1	25150500	CLIC4_TRABD2B (Breakpoint)	+:1:25150500|+:1:48336000	31	0.1	0	PossibleInversion	1:48336000
17	CLIC4_TRABD2B	1	48337500	CLIC4_TRABD2B (Breakpoint)	+:1:48337500|+:1:25149000	31	0.12	0	PossibleInversion	1:25149000
17	CLPTM1L	5	7413000	CLPTM1L (Breakpoint)	-:5:1323000|-:5:7413000	65	0.14	0	PossibleInversion	5:1323000
17	CLPTM1L	5	1324500	CLPTM1L (Breakpoint)	-:5:7414500|-:5:1324500	56	0.12	0	PossibleInversion	5:7414500
17	CLPTM1L	1	12627000	CLPTM1L (Breakpoint)	-:5:1321500|+:1:12627000	34	0.11	0	Translocation	5:1321500
17	CLPTM1L_ADCY2	5	7413000	CLPTM1L_ADCY2 (Breakpoint)	-:5:1323000|-:5:7413000	65	0.14	0	PossibleInversion	5:1323000
17	CLPTM1L_ADCY2	5	1324500	CLPTM1L_ADCY2 (Breakpoint)	-:5:7414500|-:5:1324500	56	0.12	0	PossibleInversion	5:7414500
17	CSF3R	1	36948000	CSF3R (Breakpoint)	-:1:36981000|-:1:36948000	49	0.18	0	PossibleInversion	1:36981000
17	CTNNBIP1	1	9966000	CTNNBIP1 (Breakpoint)	-:1:46665000|-:1:9966000	67	0.14	0	PossibleInversion	1:46665000
17	CTNNBIP1	1	46663500	CTNNBIP1 (Breakpoint)	-:1:9966000|-:1:46663500	35	0.1	0	PossibleInversion	1:9966000
17	CTNNBIP1_POMGNT1	1	9966000	CTNNBIP1_POMGNT1 (Breakpoint)	-:1:46665000|-:1:9966000	67	0.14	0	PossibleInversion	1:46665000
17	DHRS3	1	9691500	DHRS3 (Breakpoint)	+:1:9691500|-:1:12628500	27	0.13	0	PossibleLargeIndel	1:12628500
17	DNAJC11	1	8610000	DNAJC11 (Breakpoint)	+:1:8610000|-:1:6723000	116	0.28	0	PossibleLargeIndel	1:6723000
17	DNAJC11	1	6739500	DNAJC11 (Breakpoint)	-:1:51337500|+:1:6739500	85	0.14	0	PossibleLargeIndel	1:51337500
17	DNAJC11_FAF1	1	6739500	DNAJC11_FAF1 (Breakpoint)	-:1:51337500|+:1:6739500	85	0.14	0	PossibleLargeIndel	1:51337500
17	DNAJC11_RERE	1	8610000	DNAJC11_RERE (Breakpoint)	+:1:8610000|-:1:6723000	116	0.28	0	PossibleLargeIndel	1:6723000
17	EIF2B3	1	45331500	EIF2B3 (Breakpoint)	+:1:45331500|+:1:21967500	37	0.15	0	PossibleInversion	1:21967500
17	EIF2B3_RAP1GAP	1	45331500	EIF2B3_RAP1GAP (Breakpoint)	+:1:45331500|+:1:21967500	37	0.15	0	PossibleInversion	1:21967500
17	EPS15	1	51925500	EPS15 (Breakpoint)	-:1:51925500|-:1:56212500	71	0.18	0	PossibleInversion	1:56212500
17	FAF1	1	46468500	FAF1 (Breakpoint)	+:1:46468500|+:1:51339000	66	0.12	0	PossibleInversion	1:51339000
17	FAF1	1	51333000	FAF1 (Breakpoint)	+:1:51333000|-:1:8613000	67	0.13	0	PossibleLargeIndel	1:8613000
17	FAF1	1	51336000	FAF1 (Breakpoint)	-:1:8614500|+:1:51336000	61	0.13	0	PossibleLargeIndel	1:8614500
17	FAF1	1	51340500	FAF1 (Breakpoint)	+:1:51340500|+:1:46470000	60	0.14	0	PossibleInversion	1:46470000
17	FAF1	1	51313500	FAF1 (Breakpoint)	-:1:9741000|-:1:51313500	53	0.11	0	PossibleInversion	1:9741000
17	FAF1	1	6739500	FAF1 (Breakpoint)	-:1:51337500|+:1:6739500	85	0.14	0	PossibleLargeIndel	1:51337500
17	FAF1	1	9739500	FAF1 (Breakpoint)	-:1:51313500|-:1:9739500	42	0.11	0	PossibleInversion	1:51313500
17	FAF1	1	51282000	FAF1 (Breakpoint)	-:1:69082500|+:1:51282000	31	0.11	0	PossibleLargeIndel	1:69082500
17	FAF1_DNAJC11	1	6739500	FAF1_DNAJC11 (Breakpoint)	-:1:51337500|+:1:6739500	85	0.14	0	PossibleLargeIndel	1:51337500
17	FAF1_MAST2	1	46468500	FAF1_MAST2 (Breakpoint)	+:1:46468500|+:1:51339000	66	0.12	0	PossibleInversion	1:51339000
17	FAF1_MAST2	1	51340500	FAF1_MAST2 (Breakpoint)	+:1:51340500|+:1:46470000	60	0.14	0	PossibleInversion	1:46470000
17	FAF1_PIK3CD	1	51313500	FAF1_PIK3CD (Breakpoint)	-:1:9741000|-:1:51313500	53	0.11	0	PossibleInversion	1:9741000
17	FAF1_PIK3CD	1	9739500	FAF1_PIK3CD (Breakpoint)	-:1:51313500|-:1:9739500	42	0.11	0	PossibleInversion	1:51313500
17	FAF1_RERE	1	51333000	FAF1_RERE (Breakpoint)	+:1:51333000|-:1:8613000	67	0.13	0	PossibleLargeIndel	1:8613000
17	FAM159A	1	53103000	FAM159A (Breakpoint)	+:1:53103000|-:1:53092500	37	0.19	0	PossibleLargeIndel	1:53092500
17	FAM183A	1	30087000	FAM183A (Breakpoint)	+:1:30087000|-:1:43621500	25	0.1	0	PossibleLargeIndel	1:43621500
17	FGF10	1	8637000	FGF10 (Breakpoint)	+:1:8637000|+:5:44367000	64	0.19	0	Translocation	5:44367000
17	FGF10	5	1317000	FGF10 (Breakpoint)	-:5:44325000|+:5:1317000	89	0.26	0	PossibleLargeIndel	5:44325000
17	FGF10	5	44367000	FGF10 (Breakpoint)	+:5:44367000|+:1:8635500	37	0.1	0	Translocation	1:8635500
17	FGF10_RERE	1	8637000	FGF10_RERE (Breakpoint)	+:1:8637000|+:5:44367000	64	0.19	0	Translocation	5:44367000
17	FGF10_RERE	5	44367000	FGF10_RERE (Breakpoint)	+:5:44367000|+:1:8635500	37	0.1	0	Translocation	1:8635500
17	KIF1B	1	10344000	KIF1B (Breakpoint)	+:1:10344000|+:1:43563000	58	0.15	0	PossibleInversion	1:43563000
17	KIF1B	1	43564500	KIF1B (Breakpoint)	+:1:43564500|+:1:10345500	43	0.12	0	PossibleInversion	1:10345500
17	LRRC40	1	12451500	LRRC40 (Breakpoint)	+:1:12451500|-:1:70662000	60	0.12	0	PossibleLargeIndel	1:70662000
17	LRRC40_VPS13D	1	12451500	LRRC40_VPS13D (Breakpoint)	+:1:12451500|-:1:70662000	60	0.12	0	PossibleLargeIndel	1:70662000
17	LRRC7_SF3A3	1	38440500	LRRC7_SF3A3 (Breakpoint)	-:1:70486500|-:1:38440500	42	0.1	0	PossibleInversion	1:70486500
17	LZIC	1	9990000	LZIC (Breakpoint)	-:1:45789000|+:1:9990000	35	0.1	0	PossibleLargeIndel	1:45789000
17	MAST2	1	46468500	MAST2 (Breakpoint)	+:1:46468500|+:1:51339000	66	0.12	0	PossibleInversion	1:51339000
17	MAST2	1	51340500	MAST2 (Breakpoint)	+:1:51340500|+:1:46470000	60	0.14	0	PossibleInversion	1:46470000
17	MAST2	1	46465500	MAST2 (Breakpoint)	-:5:32838000|-:1:46465500	60	0.1	0	Translocation	5:32838000
17	MAST2_FAF1	1	46468500	MAST2_FAF1 (Breakpoint)	+:1:46468500|+:1:51339000	66	0.12	0	PossibleInversion	1:51339000
17	MAST2_FAF1	1	51340500	MAST2_FAF1 (Breakpoint)	+:1:51340500|+:1:46470000	60	0.14	0	PossibleInversion	1:46470000
17	MUTYH	1	7749000	MUTYH (Breakpoint)	+:1:7749000|+:1:45804000	64	0.1	0	PossibleInversion	1:45804000
17	MUTYH	1	45805500	MUTYH (Breakpoint)	+:1:45805500|+:1:7747500	64	0.13	0	PossibleInversion	1:7747500
17	MUTYH_CAMTA1	1	7749000	MUTYH_CAMTA1 (Breakpoint)	+:1:7749000|+:1:45804000	64	0.1	0	PossibleInversion	1:45804000
17	PIK3CD	1	51313500	PIK3CD (Breakpoint)	-:1:9741000|-:1:51313500	53	0.11	0	PossibleInversion	1:9741000
17	PIK3CD	1	9739500	PIK3CD (Breakpoint)	-:1:51313500|-:1:9739500	42	0.11	0	PossibleInversion	1:51313500
17	PIK3CD_FAF1	1	51313500	PIK3CD_FAF1 (Breakpoint)	-:1:9741000|-:1:51313500	53	0.11	0	PossibleInversion	1:9741000
17	PIK3CD_FAF1	1	9739500	PIK3CD_FAF1 (Breakpoint)	-:1:51313500|-:1:9739500	42	0.11	0	PossibleInversion	1:51313500
17	PIK3R3	1	8170500	PIK3R3 (Breakpoint)	+:1:8170500|-:1:46633500	74	0.19	0	PossibleLargeIndel	1:46633500
17	PIK3R3	1	8173500	PIK3R3 (Breakpoint)	-:1:46635000|+:1:8173500	69	0.18	0	PossibleLargeIndel	1:46635000
17	PIK3R3	5	7359000	PIK3R3 (Breakpoint)	+:5:7359000|+:1:46564500	44	0.15	0	Translocation	1:46564500
17	PIK3R3	1	46564500	PIK3R3 (Breakpoint)	+:1:46564500|+:5:7357500	39	0.12	0	Translocation	5:7357500
17	PLK3	5	2103000	PLK3 (Breakpoint)	-:1:45271500|+:5:2103000	84	0.18	0	Translocation	1:45271500
17	POMGNT1	5	9480000	POMGNT1 (Breakpoint)	+:5:9480000|+:1:46665000	73	0.18	0	Translocation	1:46665000
17	POMGNT1	1	9966000	POMGNT1 (Breakpoint)	-:1:46665000|-:1:9966000	67	0.14	0	PossibleInversion	1:46665000
17	POMGNT1	5	7387500	POMGNT1 (Breakpoint)	-:1:46666500|+:5:7387500	124	0.29	0	Translocation	1:46666500
17	POMGNT1	1	46665000	POMGNT1 (Breakpoint)	+:1:46665000|+:5:9478500	54	0.12	0	Translocation	5:9478500
17	POMGNT1	1	46668000	POMGNT1 (Breakpoint)	+:1:46668000|+:5:9664500	47	0.15	0	Translocation	5:9664500
17	POMGNT1	1	46663500	POMGNT1 (Breakpoint)	-:1:9966000|-:1:46663500	35	0.1	0	PossibleInversion	1:9966000
17	POMGNT1	1	46654500	POMGNT1 (Breakpoint)	+:1:46654500|-:5:7384500	40	0.16	0	Translocation	5:7384500
17	POMGNT1_CTNNBIP1	1	9966000	POMGNT1_CTNNBIP1 (Breakpoint)	-:1:46665000|-:1:9966000	67	0.14	0	PossibleInversion	1:46665000
17	POMGNT1_SEMA5A	5	9480000	POMGNT1_SEMA5A (Breakpoint)	+:5:9480000|+:1:46665000	73	0.18	0	Translocation	1:46665000
17	POMGNT1_SEMA5A	1	46665000	POMGNT1_SEMA5A (Breakpoint)	+:1:46665000|+:5:9478500	54	0.12	0	Translocation	5:9478500
17	POMGNT1_TAS2R1	1	46668000	POMGNT1_TAS2R1 (Breakpoint)	+:1:46668000|+:5:9664500	47	0.15	0	Translocation	5:9664500
17	PRDM16	5	2860500	PRDM16 (Breakpoint)	+:5:2860500|-:1:3058500	36	0.14	0	Translocation	1:3058500
17	RAP1GAP	1	45331500	RAP1GAP (Breakpoint)	+:1:45331500|+:1:21967500	37	0.15	0	PossibleInversion	1:21967500
17	RAP1GAP_EIF2B3	1	45331500	RAP1GAP_EIF2B3 (Breakpoint)	+:1:45331500|+:1:21967500	37	0.15	0	PossibleInversion	1:21967500
17	RERE	1	999000	RERE (Breakpoint)	-:1:8491500|+:1:999000	174	0.37	0	PossibleLargeIndel	1:8491500
17	RERE	1	8637000	RERE (Breakpoint)	+:1:8637000|+:5:44367000	64	0.19	0	Translocation	5:44367000
17	RERE	1	51333000	RERE (Breakpoint)	+:1:51333000|-:1:8613000	67	0.13	0	PossibleLargeIndel	1:8613000
17	RERE	1	51336000	RERE (Breakpoint)	-:1:8614500|+:1:51336000	61	0.13	0	PossibleLargeIndel	1:8614500
17	RERE	1	8610000	RERE (Breakpoint)	+:1:8610000|-:1:6723000	116	0.28	0	PossibleLargeIndel	1:6723000
17	RERE	5	44367000	RERE (Breakpoint)	+:5:44367000|+:1:8635500	37	0.1	0	Translocation	1:8635500
17	RERE_DNAJC11	1	8610000	RERE_DNAJC11 (Breakpoint)	+:1:8610000|-:1:6723000	116	0.28	0	PossibleLargeIndel	1:6723000
17	RERE_FAF1	1	51333000	RERE_FAF1 (Breakpoint)	+:1:51333000|-:1:8613000	67	0.13	0	PossibleLargeIndel	1:8613000
17	RERE_FGF10	1	8637000	RERE_FGF10 (Breakpoint)	+:1:8637000|+:5:44367000	64	0.19	0	Translocation	5:44367000
17	RERE_FGF10	5	44367000	RERE_FGF10 (Breakpoint)	+:5:44367000|+:1:8635500	37	0.1	0	Translocation	1:8635500
17	RUNX3	1	25291500	RUNX3 (Breakpoint)	-:1:38532000|+:1:25291500	38	0.1	0	PossibleLargeIndel	1:38532000
17	RUNX3	1	37759500	RUNX3 (Breakpoint)	+:1:37759500|-:1:25285500	56	0.18	0	PossibleLargeIndel	1:25285500
17	SEMA5A	5	9480000	SEMA5A (Breakpoint)	+:5:9480000|+:1:46665000	73	0.18	0	Translocation	1:46665000
17	SEMA5A	1	46665000	SEMA5A (Breakpoint)	+:1:46665000|+:5:9478500	54	0.12	0	Translocation	5:9478500
17	SEMA5A	1	52726500	SEMA5A (Breakpoint)	-:5:9477000|+:1:52726500	84	0.14	0	Translocation	5:9477000
17	SEMA5A	5	9346500	SEMA5A (Breakpoint)	-:5:9346500|-:1:9520500	34	0.13	0	Translocation	1:9520500
17	SEMA5A_POMGNT1	5	9480000	SEMA5A_POMGNT1 (Breakpoint)	+:5:9480000|+:1:46665000	73	0.18	0	Translocation	1:46665000
17	SEMA5A_POMGNT1	1	46665000	SEMA5A_POMGNT1 (Breakpoint)	+:1:46665000|+:5:9478500	54	0.12	0	Translocation	5:9478500
17	SEMA5A_ZFYVE9	1	52726500	SEMA5A_ZFYVE9 (Breakpoint)	-:5:9477000|+:1:52726500	84	0.14	0	Translocation	5:9477000
17	SF3A3	1	38440500	SF3A3 (Breakpoint)	-:1:70486500|-:1:38440500	42	0.1	0	PossibleInversion	1:70486500
17	SF3A3_LRRC7	1	38440500	SF3A3_LRRC7 (Breakpoint)	-:1:70486500|-:1:38440500	42	0.1	0	PossibleInversion	1:70486500
17	TAS2R1	1	46668000	TAS2R1 (Breakpoint)	+:1:46668000|+:5:9664500	47	0.15	0	Translocation	5:9664500
17	TAS2R1_POMGNT1	1	46668000	TAS2R1_POMGNT1 (Breakpoint)	+:1:46668000|+:5:9664500	47	0.15	0	Translocation	5:9664500
17	TCTEX1D4	5	2103000	TCTEX1D4 (Breakpoint)	-:1:45271500|+:5:2103000	84	0.18	0	Translocation	1:45271500
17	TERT	5	1282500	TERT (Breakpoint)	-:5:1290000|+:5:1282500	64	0.15	0	PossibleLargeIndel	5:1290000
17	TNFRSF9	1	71202000	TNFRSF9 (Breakpoint)	+:1:71202000|+:1:7983000	64	0.35	0	PossibleInversion	1:7983000
17	TOE1	1	45805500	TOE1 (Breakpoint)	+:1:45805500|+:1:7747500	64	0.13	0	PossibleInversion	1:7747500
17	TRABD2B	1	25150500	TRABD2B (Breakpoint)	+:1:25150500|+:1:48336000	31	0.1	0	PossibleInversion	1:48336000
17	TRABD2B	1	48337500	TRABD2B (Breakpoint)	+:1:48337500|+:1:25149000	31	0.12	0	PossibleInversion	1:25149000
17	TRABD2B_CLIC4	1	25150500	TRABD2B_CLIC4 (Breakpoint)	+:1:25150500|+:1:48336000	31	0.1	0	PossibleInversion	1:48336000
17	TRABD2B_CLIC4	1	48337500	TRABD2B_CLIC4 (Breakpoint)	+:1:48337500|+:1:25149000	31	0.12	0	PossibleInversion	1:25149000
17	VPS13D	1	12451500	VPS13D (Breakpoint)	+:1:12451500|-:1:70662000	60	0.12	0	PossibleLargeIndel	1:70662000
17	VPS13D_LRRC40	1	12451500	VPS13D_LRRC40 (Breakpoint)	+:1:12451500|-:1:70662000	60	0.12	0	PossibleLargeIndel	1:70662000
17	ZDHHC11	5	847500	ZDHHC11 (Breakpoint)	+:5:847500|-:1:45588000	49	0.13	0	Translocation	1:45588000
17	ZDHHC11	5	754500	ZDHHC11 (Breakpoint)	+:5:754500|-:1:45588000	42	0.1	0	Translocation	1:45588000
17	ZDHHC11_ZSWIM5	5	847500	ZDHHC11_ZSWIM5 (Breakpoint)	+:5:847500|-:1:45588000	49	0.13	0	Translocation	1:45588000
17	ZDHHC11B	5	754500	ZDHHC11B (Breakpoint)	+:5:754500|-:1:45588000	42	0.1	0	Translocation	1:45588000
17	ZFYVE9	1	52726500	ZFYVE9 (Breakpoint)	-:5:9477000|+:1:52726500	84	0.14	0	Translocation	5:9477000
17	ZFYVE9_SEMA5A	1	52726500	ZFYVE9_SEMA5A (Breakpoint)	-:5:9477000|+:1:52726500	84	0.14	0	Translocation	5:9477000
17	ZSWIM5	5	847500	ZSWIM5 (Breakpoint)	+:5:847500|-:1:45588000	49	0.13	0	Translocation	1:45588000
17	ZSWIM5	5	754500	ZSWIM5 (Breakpoint)	+:5:754500|-:1:45588000	42	0.1	0	Translocation	1:45588000
17	ZSWIM5	1	45570000	ZSWIM5 (Breakpoint)	+:1:45570000|-:1:43596000	34	0.12	0	PossibleLargeIndel	1:43596000
17	ZSWIM5	1	10675500	ZSWIM5 (Breakpoint)	+:1:10675500|-:1:45558000	20	0.11	0	PossibleLargeIndel	1:45558000
17	ZSWIM5_ZDHHC11	5	847500	ZSWIM5_ZDHHC11 (Breakpoint)	+:5:847500|-:1:45588000	49	0.13	0	Translocation	1:45588000
18	EGFR	7	55284600	EGFR (Breakpoint)	+:7:55284600|-:7:55288800	26	0.16	0	PossibleLargeIndel	7:55288800
20	AADACL3	1	22001000	AADACL3 (Breakpoint)	-:1:12779200|+:1:22001000	25	0.12	0	PossibleLargeIndel	1:12779200
20	AADACL3	1	22001000	AADACL3 (Breakpoint)	-:1:12779200|+:1:22001000	25	0.12	0	PossibleLargeIndel	1:12779200
20	ADAMTS17	15	100598400	ADAMTS17 (Breakpoint)	-:15:100353400|+:15:100598400	32	0.12	0	PossibleLargeIndel	15:100353400
20	ALPK1	4	113223600	ALPK1 (Breakpoint)	+:4:113223600|-:4:113232000	29	0.16	0	PossibleLargeIndel	4:113232000
20	ANKRD18A	9	38607800	ANKRD18A (Breakpoint)	-:9:136750600|-:9:38607800	26	0.1	0	PossibleInversion	9:136750600
20	ANKRD18A	9	38599400	ANKRD18A (Breakpoint)	+:9:38599400|-:9:33717600	24	0.12	0	PossibleLargeIndel	9:33717600
20	ANKRD18A	9	38607800	ANKRD18A (Breakpoint)	-:9:136750600|-:9:38607800	26	0.1	0	PossibleInversion	9:136750600
20	ANKRD18A	9	38599400	ANKRD18A (Breakpoint)	+:9:38599400|-:9:33717600	24	0.12	0	PossibleLargeIndel	9:33717600
20	ANKRD18A_VAV2	9	38607800	ANKRD18A_VAV2 (Breakpoint)	-:9:136750600|-:9:38607800	26	0.1	0	PossibleInversion	9:136750600
20	ANKRD18A_VAV2	9	38607800	ANKRD18A_VAV2 (Breakpoint)	-:9:136750600|-:9:38607800	26	0.1	0	PossibleInversion	9:136750600
20	ANKS1B	12	99792000	ANKS1B (Breakpoint)	+:12:99792000|-:12:99801800	25	0.22	0	PossibleLargeIndel	12:99801800
20	ARFGEF1	8	68154800	ARFGEF1 (Breakpoint)	+:8:68154800|-:8:68161800	58	0.18	0	PossibleLargeIndel	8:68161800
20	ATG10	5	81564000	ATG10 (Breakpoint)	+:5:81564000|-:5:81568200	26	0.18	0	PossibleLargeIndel	5:81568200
20	ATP13A4	3	193134200	ATP13A4 (Breakpoint)	-:3:193142600|+:3:193134200	27	0.18	0	PossibleLargeIndel	3:193142600
20	ATP13A4	3	193134200	ATP13A4 (Breakpoint)	-:3:193142600|+:3:193134200	43	0.27	0	PossibleLargeIndel	3:193142600
20	BAI3	6	70012600	BAI3 (Breakpoint)	+:6:70012600|-:6:70018200	37	0.18	0	PossibleLargeIndel	6:70018200
20	BAI3	6	70012600	BAI3 (Breakpoint)	+:6:70012600|-:6:70018200	29	0.13	0	PossibleLargeIndel	6:70018200
20	CALN1	7	71820000	CALN1 (Breakpoint)	+:7:71820000|-:7:71822800	29	0.21	0	PossibleLargeIndel	7:71822800
20	CCDC102B	18	66606400	CCDC102B (Breakpoint)	+:18:66606400|-:18:66514000	27	0.11	0	PossibleLargeIndel	18:66514000
20	CCDC102B	18	66606400	CCDC102B (Breakpoint)	+:18:66606400|-:18:66514000	32	0.15	0	PossibleLargeIndel	18:66514000
20	CD96	3	111242600	CD96 (Breakpoint)	+:3:111242600|-:3:111248200	26	0.24	0	PossibleLargeIndel	3:111248200
20	CLEC4C	12	7883400	CLEC4C (Breakpoint)	+:12:7883400|-:12:7886200	29	0.18	0	PossibleLargeIndel	12:7886200
20	CNBD1	6	40422200	CNBD1 (Breakpoint)	-:8:88506600|+:6:40422200	26	0.1	0	Translocation	8:88506600
20	CNBD1_LRFN2	6	40422200	CNBD1_LRFN2 (Breakpoint)	-:8:88506600|+:6:40422200	26	0.1	0	Translocation	8:88506600
20	CSMD1	8	3784200	CSMD1 (Breakpoint)	+:8:3784200|-:8:3789800	30	0.2	0	PossibleLargeIndel	8:3789800
20	CSMD1	8	3595200	CSMD1 (Breakpoint)	-:8:3488800|+:8:3595200	34	0.17	0	PossibleLargeIndel	8:3488800
20	CSMD1	8	3595200	CSMD1 (Breakpoint)	-:8:3488800|+:8:3595200	34	0.16	0	PossibleLargeIndel	8:3488800
20	EPHB2	1	91841400	EPHB2 (Breakpoint)	-:1:23174200|+:1:91841400	27	0.13	0	PossibleLargeIndel	1:23174200
20	EPHB2	1	91841400	EPHB2 (Breakpoint)	-:1:23174200|+:1:91841400	27	0.12	0	PossibleLargeIndel	1:23174200
20	EPHB2_HFM1	1	91841400	EPHB2_HFM1 (Breakpoint)	-:1:23174200|+:1:91841400	27	0.13	0	PossibleLargeIndel	1:23174200
20	EPHB2_HFM1	1	91841400	EPHB2_HFM1 (Breakpoint)	-:1:23174200|+:1:91841400	27	0.12	0	PossibleLargeIndel	1:23174200
20	FBXO16	8	28309400	FBXO16 (Breakpoint)	-:8:28312200|+:8:28309400	34	0.2	0	PossibleLargeIndel	8:28312200
20	FRMPD1	9	37667000	FRMPD1 (Breakpoint)	-:9:31707200|+:9:37667000	27	0.21	0	PossibleLargeIndel	9:31707200
20	FRMPD1	9	37667000	FRMPD1 (Breakpoint)	-:9:31707200|+:9:37667000	27	0.2	0	PossibleLargeIndel	9:31707200
20	GALNT18	11	11377800	GALNT18 (Breakpoint)	+:11:11377800|-:11:11380600	33	0.2	0	PossibleLargeIndel	11:11380600
20	GRHL2	8	102620000	GRHL2 (Breakpoint)	-:8:102625600|+:8:102620000	27	0.24	0	PossibleLargeIndel	8:102625600
20	GRHL3	1	76850200	GRHL3 (Breakpoint)	-:1:24649800|+:1:76850200	37	0.2	0	PossibleLargeIndel	1:24649800
20	GRHL3	1	76850200	GRHL3 (Breakpoint)	-:1:24649800|+:1:76850200	37	0.19	0	PossibleLargeIndel	1:24649800
20	GRHL3_ST6GALNAC3	1	76850200	GRHL3_ST6GALNAC3 (Breakpoint)	-:1:24649800|+:1:76850200	37	0.2	0	PossibleLargeIndel	1:24649800
20	GRHL3_ST6GALNAC3	1	76850200	GRHL3_ST6GALNAC3 (Breakpoint)	-:1:24649800|+:1:76850200	37	0.19	0	PossibleLargeIndel	1:24649800
20	HAT1	2	172831400	HAT1 (Breakpoint)	-:2:172839800|+:2:172831400	27	0.38	0	PossibleLargeIndel	2:172839800
20	HFM1	1	91841400	HFM1 (Breakpoint)	-:1:23174200|+:1:91841400	27	0.13	0	PossibleLargeIndel	1:23174200
20	HFM1	1	91841400	HFM1 (Breakpoint)	-:1:23174200|+:1:91841400	27	0.12	0	PossibleLargeIndel	1:23174200
20	HFM1_EPHB2	1	91841400	HFM1_EPHB2 (Breakpoint)	-:1:23174200|+:1:91841400	27	0.13	0	PossibleLargeIndel	1:23174200
20	HFM1_EPHB2	1	91841400	HFM1_EPHB2 (Breakpoint)	-:1:23174200|+:1:91841400	27	0.12	0	PossibleLargeIndel	1:23174200
20	KCNAB1	3	156090200	KCNAB1 (Breakpoint)	+:3:156090200|-:3:156093000	47	0.32	0	PossibleLargeIndel	3:156093000
20	KCNAB1	3	156090200	KCNAB1 (Breakpoint)	+:3:156090200|-:3:156093000	44	0.27	0	PossibleLargeIndel	3:156093000
20	KLHL1	1	105914200	KLHL1 (Breakpoint)	+:1:105914200|-:13:70519400	28	0.14	0	Translocation	13:70519400
20	KLHL1	1	105917000	KLHL1 (Breakpoint)	-:13:70520800|+:1:105917000	20	0.16	0	Translocation	13:70520800
20	KLHL1	1	105917000	KLHL1 (Breakpoint)	-:13:70520800|+:1:105917000	25	0.15	0	Translocation	13:70520800
20	LMBR1	7	156632000	LMBR1 (Breakpoint)	+:7:156632000|-:7:156643200	39	0.25	0	PossibleLargeIndel	7:156643200
20	LRFN2	6	40422200	LRFN2 (Breakpoint)	-:8:88506600|+:6:40422200	26	0.1	0	Translocation	8:88506600
20	LRFN2_CNBD1	6	40422200	LRFN2_CNBD1 (Breakpoint)	-:8:88506600|+:6:40422200	26	0.1	0	Translocation	8:88506600
20	MAP7	6	136850000	MAP7 (Breakpoint)	+:6:136850000|-:6:136852800	26	0.14	0	PossibleLargeIndel	6:136852800
20	MAP7	6	136850000	MAP7 (Breakpoint)	+:6:136850000|-:6:136852800	38	0.19	0	PossibleLargeIndel	6:136852800
20	MOV10	1	116096400	MOV10 (Breakpoint)	+:1:116096400|-:1:113233400	57	0.19	0	PossibleLargeIndel	1:113233400
20	MOV10	1	116096400	MOV10 (Breakpoint)	+:1:116096400|-:1:113233400	57	0.19	0	PossibleLargeIndel	1:113233400
20	MSR1	8	16199400	MSR1 (Breakpoint)	+:8:16199400|-:8:16206400	28	0.19	0	PossibleLargeIndel	8:16206400
20	MSR1	8	16199400	MSR1 (Breakpoint)	+:8:16199400|-:8:16206400	31	0.23	0	PossibleLargeIndel	8:16206400
20	NBPF3	1	21775600	NBPF3 (Breakpoint)	+:1:21775600|-:1:103069400	68	0.25	0	PossibleLargeIndel	1:103069400
20	NBPF3	1	21775600	NBPF3 (Breakpoint)	+:1:21775600|-:1:103069400	68	0.24	0	PossibleLargeIndel	1:103069400
20	NDST3	4	119124600	NDST3 (Breakpoint)	+:4:119124600|-:4:119130200	42	0.26	0	PossibleLargeIndel	4:119130200
20	NDUFB4	3	120316000	NDUFB4 (Breakpoint)	+:3:120316000|-:3:120318800	28	0.36	0	PossibleLargeIndel	3:120318800
20	NOD1	7	30478000	NOD1 (Breakpoint)	-:7:30483600|+:7:30478000	26	0.27	0	PossibleLargeIndel	7:30483600
20	PARK2	6	162401400	PARK2 (Breakpoint)	+:6:162401400|-:6:162404200	25	0.17	0	PossibleLargeIndel	6:162404200
20	PRKCH	14	61962600	PRKCH (Breakpoint)	+:14:61962600|-:14:61983600	31	0.21	0	PossibleLargeIndel	14:61983600
20	RBPJ	4	26289200	RBPJ (Breakpoint)	-:4:26294800|+:4:26289200	41	0.29	0	PossibleLargeIndel	4:26294800
20	SCN9A	2	167154400	SCN9A (Breakpoint)	-:2:167158600|+:2:167154400	32	0.23	0	PossibleLargeIndel	2:167158600
20	SCN9A	2	167154400	SCN9A (Breakpoint)	+:2:167154400|-:2:167158600	37	0.33	0	PossibleLargeIndel	2:167158600
20	SELP	1	169573600	SELP (Breakpoint)	+:1:169573600|-:1:169580600	26	0.17	0	PossibleLargeIndel	1:169580600
20	SELP	1	169576400	SELP (Breakpoint)	-:1:169582000|+:1:169576400	20	0.14	0	PossibleLargeIndel	1:169582000
20	SELP	1	169573600	SELP (Breakpoint)	+:1:169573600|-:1:169580600	31	0.18	0	PossibleLargeIndel	1:169580600
20	SLC25A12	2	172831400	SLC25A12 (Breakpoint)	-:2:172839800|+:2:172831400	27	0.38	0	PossibleLargeIndel	2:172839800
20	SLC39A11	17	70813400	SLC39A11 (Breakpoint)	+:17:70813400|-:17:70820400	29	0.21	0	PossibleLargeIndel	17:70820400
20	SLC4A10	2	162332800	SLC4A10 (Breakpoint)	+:2:162332800|-:2:162335600	31	0.28	0	PossibleLargeIndel	2:162335600
20	SMCO2	12	27647200	SMCO2 (Breakpoint)	-:12:27654200|+:12:27647200	31	0.28	0	PossibleLargeIndel	12:27654200
20	SPATA17	18	64979600	SPATA17 (Breakpoint)	+:18:64979600|-:1:217973000	28	0.14	0	Translocation	1:217973000
20	SPATA17	18	64979600	SPATA17 (Breakpoint)	-:1:217973000|+:18:64979600	27	0.18	0	Translocation	1:217973000
20	SPOCK3	4	168107800	SPOCK3 (Breakpoint)	+:4:168107800|-:4:168114800	34	0.2	0	PossibleLargeIndel	4:168114800
20	ST6GALNAC3	1	76850200	ST6GALNAC3 (Breakpoint)	-:1:24649800|+:1:76850200	37	0.2	0	PossibleLargeIndel	1:24649800
20	ST6GALNAC3	1	91959000	ST6GALNAC3 (Breakpoint)	+:1:91959000|-:1:76848800	21	0.11	0	PossibleLargeIndel	1:76848800
20	ST6GALNAC3	1	76850200	ST6GALNAC3 (Breakpoint)	-:1:24649800|+:1:76850200	37	0.19	0	PossibleLargeIndel	1:24649800
20	ST6GALNAC3	1	91959000	ST6GALNAC3 (Breakpoint)	+:1:91959000|-:1:76848800	21	0.1	0	PossibleLargeIndel	1:76848800
20	ST6GALNAC3_GRHL3	1	76850200	ST6GALNAC3_GRHL3 (Breakpoint)	-:1:24649800|+:1:76850200	37	0.2	0	PossibleLargeIndel	1:24649800
20	ST6GALNAC3_GRHL3	1	76850200	ST6GALNAC3_GRHL3 (Breakpoint)	-:1:24649800|+:1:76850200	37	0.19	0	PossibleLargeIndel	1:24649800
20	TNFSF13B	13	108945200	TNFSF13B (Breakpoint)	+:13:108945200|-:13:108950800	32	0.18	0	PossibleLargeIndel	13:108950800
20	TRAP1	16	3750600	TRAP1 (Breakpoint)	+:16:3750600|-:16:3753400	34	0.23	0	PossibleLargeIndel	16:3753400
20	TRPC6	11	101564400	TRPC6 (Breakpoint)	-:11:101574200|+:11:101564400	26	0.23	0	PossibleLargeIndel	11:101574200
20	TRPC6	11	101564400	TRPC6 (Breakpoint)	-:11:101574200|+:11:101564400	32	0.3	0	PossibleLargeIndel	11:101574200
20	TTC34	1	2709000	TTC34 (Breakpoint)	+:1:2709000|-:1:90571600	39	0.13	0	PossibleLargeIndel	1:90571600
20	TTC34	1	2709000	TTC34 (Breakpoint)	+:1:2709000|-:1:90571600	39	0.13	0	PossibleLargeIndel	1:90571600
20	UACA	15	71020600	UACA (Breakpoint)	-:15:71026200|+:15:71020600	32	0.35	0	PossibleLargeIndel	15:71026200
20	UACA	15	71022000	UACA (Breakpoint)	+:15:71022000|-:15:71029000	25	0.24	0	PossibleLargeIndel	15:71029000
20	UACA	15	71020600	UACA (Breakpoint)	-:15:71026200|+:15:71020600	42	0.39	0	PossibleLargeIndel	15:71026200
20	UACA	15	71022000	UACA (Breakpoint)	+:15:71022000|-:15:71029000	26	0.26	0	PossibleLargeIndel	15:71029000
20	UGT1A8	2	234542000	UGT1A8 (Breakpoint)	-:2:234544800|+:2:234542000	28	0.22	0	PossibleLargeIndel	2:234544800
20	USP48	1	90644400	USP48 (Breakpoint)	-:1:22054200|+:1:90644400	27	0.15	0	PossibleLargeIndel	1:22054200
20	USP48	1	90644400	USP48 (Breakpoint)	-:1:22054200|+:1:90644400	27	0.15	0	PossibleLargeIndel	1:22054200
20	VAV2	9	38607800	VAV2 (Breakpoint)	-:9:136750600|-:9:38607800	26	0.1	0	PossibleInversion	9:136750600
20	VAV2	9	38607800	VAV2 (Breakpoint)	-:9:136750600|-:9:38607800	26	0.1	0	PossibleInversion	9:136750600
20	VAV2_ANKRD18A	9	38607800	VAV2_ANKRD18A (Breakpoint)	-:9:136750600|-:9:38607800	26	0.1	0	PossibleInversion	9:136750600
20	VAV2_ANKRD18A	9	38607800	VAV2_ANKRD18A (Breakpoint)	-:9:136750600|-:9:38607800	26	0.1	0	PossibleInversion	9:136750600
20	ZSCAN5A	19	56865200	ZSCAN5A (Breakpoint)	-:19:56869400|+:19:56865200	34	0.25	0	PossibleLargeIndel	19:56869400
21	BTRC	10	103171600	BTRC (Breakpoint)	+:10:103171600|-:10:103157600	40	0.17	0	PossibleLargeIndel	10:103157600
21	CCPG1	15	55654200	CCPG1 (Breakpoint)	-:15:55657000|+:15:55654200	27	0.13	0	PossibleLargeIndel	15:55657000
21	CDH13	16	83669600	CDH13 (Breakpoint)	+:16:83669600|-:16:83676600	33	0.2	0	PossibleLargeIndel	16:83676600
21	EFCAB8	20	31523800	EFCAB8 (Breakpoint)	+:20:31523800|-:20:31529400	31	0.14	0	PossibleLargeIndel	20:31529400
21	ESR1	6	152388600	ESR1 (Breakpoint)	-:6:152391400|+:6:152388600	37	0.27	0	PossibleLargeIndel	6:152391400
21	HTR5A	7	154876400	HTR5A (Breakpoint)	-:7:154880600|+:7:154876400	41	0.14	0	PossibleLargeIndel	7:154880600
21	LDLRAD3	9	8750000	LDLRAD3 (Breakpoint)	-:11:36177400|+:9:8750000	28	0.15	0	Translocation	11:36177400
21	LDLRAD3_PTPRD	9	8750000	LDLRAD3_PTPRD (Breakpoint)	-:11:36177400|+:9:8750000	28	0.15	0	Translocation	11:36177400
21	NDST3	4	119124600	NDST3 (Breakpoint)	+:4:119124600|-:4:119130200	48	0.22	0	PossibleLargeIndel	4:119130200
21	PPP6C	9	127934800	PPP6C (Breakpoint)	+:9:127934800|-:9:90984600	30	0.17	0	PossibleLargeIndel	9:90984600
21	PRKAG2	7	151524800	PRKAG2 (Breakpoint)	+:7:151524800|-:7:151527600	42	0.15	0	PossibleLargeIndel	7:151527600
21	PRSS12	4	119242200	PRSS12 (Breakpoint)	+:4:119242200|-:4:119246400	38	0.18	0	PossibleLargeIndel	4:119246400
21	PTPRD	9	8750000	PTPRD (Breakpoint)	-:11:36177400|+:9:8750000	28	0.15	0	Translocation	11:36177400
21	PTPRD_LDLRAD3	9	8750000	PTPRD_LDLRAD3 (Breakpoint)	-:11:36177400|+:9:8750000	28	0.15	0	Translocation	11:36177400
21	QRFPR	4	122283000	QRFPR (Breakpoint)	+:4:122283000|-:4:122291400	27	0.15	0	PossibleLargeIndel	4:122291400
21	SPAG16	2	214873400	SPAG16 (Breakpoint)	+:2:214873400|-:2:214876200	40	0.2	0	PossibleLargeIndel	2:214876200
21	TM4SF20	2	228257400	TM4SF20 (Breakpoint)	+:2:228257400|-:2:228240600	58	0.16	0	PossibleLargeIndel	2:228240600
22	ACACA	17	35754600	ACACA (Breakpoint)	-:17:35758800|+:17:35754600	29	0.17	0	PossibleLargeIndel	17:35758800
22	ADCY2	5	3350200	ADCY2 (Breakpoint)	-:5:7464800|+:5:3350200	79	0.22	0	PossibleLargeIndel	5:7464800
22	ADCY2	5	7494200	ADCY2 (Breakpoint)	+:5:7494200|-:20:11548600	90	0.22	0	Translocation	20:11548600
22	ADCY2	5	3351600	ADCY2 (Breakpoint)	+:5:3351600|-:5:7467600	33	0.1	0	PossibleLargeIndel	5:7467600
22	ADCY2	5	7802200	ADCY2 (Breakpoint)	+:5:7802200|-:16:17298400	24	0.1	0	Translocation	16:17298400
22	ANKRD28	3	15843800	ANKRD28 (Breakpoint)	-:3:15846600|+:3:15843800	47	0.19	0	PossibleLargeIndel	3:15846600
22	CCDC50	3	191063600	CCDC50 (Breakpoint)	-:3:191070600|+:3:191063600	25	0.13	0	PossibleLargeIndel	3:191070600
22	CCPG1	15	55654200	CCPG1 (Breakpoint)	+:15:55654200|-:15:55657000	26	0.14	0	PossibleLargeIndel	15:55657000
22	CELF1	11	47524400	CELF1 (Breakpoint)	+:11:47524400|-:11:47527200	26	0.17	0	PossibleLargeIndel	11:47527200
22	CLNK	4	10612000	CLNK (Breakpoint)	+:4:10612000|-:12:69125000	63	0.22	0	Translocation	12:69125000
22	CLNK_NUP107	4	10612000	CLNK_NUP107 (Breakpoint)	+:4:10612000|-:12:69125000	63	0.22	0	Translocation	12:69125000
22	CPNE4	3	131987800	CPNE4 (Breakpoint)	+:3:131987800|-:3:131994800	28	0.17	0	PossibleLargeIndel	3:131994800
22	CTNND2	5	11359600	CTNND2 (Breakpoint)	+:5:11359600|+:5:2469600	33	0.1	0	PossibleInversion	5:2469600
22	CTNND2	5	2471000	CTNND2 (Breakpoint)	+:5:2471000|+:5:11358200	33	0.1	0	PossibleInversion	5:11358200
22	EPHA3	3	89392800	EPHA3 (Breakpoint)	-:3:89419400|+:3:89392800	31	0.15	0	PossibleLargeIndel	3:89419400
22	FAM172A	5	15780800	FAM172A (Breakpoint)	-:5:93422000|+:5:15780800	33	0.12	0	PossibleLargeIndel	5:93422000
22	FAM172A_FBXL7	5	15780800	FAM172A_FBXL7 (Breakpoint)	-:5:93422000|+:5:15780800	33	0.12	0	PossibleLargeIndel	5:93422000
22	FBXL7_FAM172A	5	15780800	FBXL7_FAM172A (Breakpoint)	-:5:93422000|+:5:15780800	33	0.12	0	PossibleLargeIndel	5:93422000
22	FHIT	3	60818800	FHIT (Breakpoint)	+:3:60818800|-:3:60824400	44	0.18	0	PossibleLargeIndel	3:60824400
22	HAGHL	7	5429200	HAGHL (Breakpoint)	+:7:5429200|-:16:785400	45	0.2	0	Translocation	16:785400
22	MAGI2	7	78391600	MAGI2 (Breakpoint)	+:7:78391600|-:7:78397200	28	0.1	0	PossibleLargeIndel	7:78397200
22	MYO10	5	16769200	MYO10 (Breakpoint)	-:5:4566800|-:5:16769200	43	0.11	0	PossibleInversion	5:4566800
22	MYO10	5	4568200	MYO10 (Breakpoint)	-:5:16770600|-:5:4568200	37	0.12	0	PossibleInversion	5:16770600
22	NARFL	7	5429200	NARFL (Breakpoint)	+:7:5429200|-:16:785400	45	0.2	0	Translocation	16:785400
22	NRXN3	14	80105200	NRXN3 (Breakpoint)	+:14:80105200|-:14:80115000	32	0.15	0	PossibleLargeIndel	14:80115000
22	NUP107	4	10612000	NUP107 (Breakpoint)	+:4:10612000|-:12:69125000	63	0.22	0	Translocation	12:69125000
22	NUP107_CLNK	4	10612000	NUP107_CLNK (Breakpoint)	+:4:10612000|-:12:69125000	63	0.22	0	Translocation	12:69125000
22	PAPD7	5	6756400	PAPD7 (Breakpoint)	-:5:21030800|+:5:6756400	41	0.11	0	PossibleLargeIndel	5:21030800
22	PAPD7	5	1737400	PAPD7 (Breakpoint)	-:5:6722800|+:5:1737400	36	0.1	0	PossibleLargeIndel	5:6722800
22	PDCD6	5	291200	PDCD6 (Breakpoint)	+:5:291200|-:5:4100600	36	0.14	0	PossibleLargeIndel	5:4100600
22	PKHD1	6	51801400	PKHD1 (Breakpoint)	+:6:51801400|-:6:51808400	25	0.13	0	PossibleLargeIndel	6:51808400
22	PLCB4	20	6151600	PLCB4 (Breakpoint)	+:20:6151600|-:20:9212000	26	0.1	0	PossibleLargeIndel	20:9212000
22	PPHLN1	12	42695800	PPHLN1 (Breakpoint)	+:12:42695800|-:12:42700000	36	0.21	0	PossibleLargeIndel	12:42700000
22	PSD3	8	18849600	PSD3 (Breakpoint)	-:8:18865000|+:8:18849600	37	0.2	0	PossibleLargeIndel	8:18865000
22	RASGRP3	2	33769400	RASGRP3 (Breakpoint)	-:2:33765200|-:2:33769400	25	0.19	0	PossibleInversion	2:33765200
22	RASGRP3	2	33763800	RASGRP3 (Breakpoint)	-:2:33768000|-:2:33763800	24	0.19	0	PossibleInversion	2:33768000
22	SSBP2	5	87123400	SSBP2 (Breakpoint)	+:5:87123400|-:5:80731000	39	0.11	0	PossibleLargeIndel	5:80731000
22	THSD4	15	71472800	THSD4 (Breakpoint)	+:15:71472800|-:15:71477000	28	0.16	0	PossibleLargeIndel	15:71477000
22	TNFSF13B	13	108945200	TNFSF13B (Breakpoint)	+:13:108945200|-:13:108950800	27	0.15	0	PossibleLargeIndel	13:108950800
22	TNRC18	7	5429200	TNRC18 (Breakpoint)	+:7:5429200|-:16:785400	45	0.2	0	Translocation	16:785400
22	XYLT1	5	7802200	XYLT1 (Breakpoint)	+:5:7802200|-:16:17298400	24	0.1	0	Translocation	16:17298400
24	ADAMTS15	11	130323200	ADAMTS15 (Breakpoint)	+:11:130323200|+:11:78286600	37	0.18	0	PossibleInversion	11:78286600
24	ADAMTS15	11	78288000	ADAMTS15 (Breakpoint)	+:11:78288000|+:11:130324600	36	0.19	0	PossibleInversion	11:130324600
24	ARHGAP20	11	127443400	ARHGAP20 (Breakpoint)	-:11:110462800|-:11:127443400	26	0.1	0	PossibleInversion	11:110462800
24	ARHGAP20	11	110525800	ARHGAP20 (Breakpoint)	-:11:127521800|+:11:110525800	32	0.14	0	PossibleLargeIndel	11:127521800
24	ARHGAP32	11	112680400	ARHGAP32 (Breakpoint)	-:11:128857400|-:11:112680400	29	0.15	0	PossibleInversion	11:128857400
24	ARHGAP32	11	128860200	ARHGAP32 (Breakpoint)	-:11:112681800|-:11:128860200	22	0.1	0	PossibleInversion	11:112681800
24	ARHGAP32	11	91810600	ARHGAP32 (Breakpoint)	+:11:91810600|-:11:129075800	33	0.11	0	PossibleLargeIndel	11:129075800
24	ARHGAP42	11	100692200	ARHGAP42 (Breakpoint)	-:11:100692200|+:11:101147200	57	0.11	0	PossibleTandemDup	11:101147200
24	ARHGAP42	11	100692200	ARHGAP42 (Breakpoint)	+:11:100692200|-:11:123530400	62	0.26	0	PossibleLargeIndel	11:123530400
24	ARHGAP42	11	100692200	ARHGAP42 (Breakpoint)	-:11:114616600|+:11:100692200	26	0.12	0	PossibleLargeIndel	11:114616600
24	ARHGAP42	11	134338400	ARHGAP42 (Breakpoint)	-:11:100692200|+:11:134338400	46	0.22	0	PossibleLargeIndel	11:100692200
24	ARHGAP42	11	98558600	ARHGAP42 (Breakpoint)	+:11:98558600|+:11:100692200	23	0.11	0	PossibleInversion	11:100692200
24	ARHGAP42	11	100692200	ARHGAP42 (Breakpoint)	-:11:110394200|+:11:100692200	23	0.11	0	PossibleLargeIndel	11:110394200
24	ATL3	11	87588200	ATL3 (Breakpoint)	-:11:63427000|+:11:87588200	43	0.16	0	PossibleLargeIndel	11:63427000
24	ATL3	11	63428400	ATL3 (Breakpoint)	+:11:63428400|+:11:107129400	29	0.1	0	PossibleInversion	11:107129400
24	ATL3	11	87589600	ATL3 (Breakpoint)	+:11:87589600|-:11:63429800	24	0.16	0	PossibleLargeIndel	11:63429800
24	ATL3	11	63428400	ATL3 (Breakpoint)	+:11:63428400|+:11:114741200	24	0.14	0	PossibleInversion	11:114741200
24	BTG4	11	75881400	BTG4 (Breakpoint)	+:11:75881400|+:11:111340600	38	0.2	0	PossibleInversion	11:111340600
24	BTG4	11	111340600	BTG4 (Breakpoint)	+:11:111340600|+:11:75880000	28	0.1	0	PossibleInversion	11:75880000
24	CADM1	11	78282400	CADM1 (Breakpoint)	-:11:115337600|-:11:78282400	39	0.1	0	PossibleInversion	11:115337600
24	CADM1_NARS2	11	78282400	CADM1_NARS2 (Breakpoint)	-:11:115337600|-:11:78282400	39	0.1	0	PossibleInversion	11:115337600
24	CAV2	7	115929800	CAV2 (Breakpoint)	+:7:115929800|-:7:115941000	25	0.14	0	PossibleLargeIndel	7:115941000
24	CD5	11	60880400	CD5 (Breakpoint)	+:11:60880400|+:11:97671000	38	0.15	0	PossibleInversion	11:97671000
24	CD96	3	111242600	CD96 (Breakpoint)	+:3:111242600|-:3:111248200	26	0.2	0	PossibleLargeIndel	3:111248200
24	CDH13	16	83669600	CDH13 (Breakpoint)	-:16:83676600|+:16:83669600	30	0.18	0	PossibleLargeIndel	16:83676600
24	CHD7	8	61496400	CHD7 (Breakpoint)	-:8:61601400|+:8:61496400	57	0.22	0	PossibleLargeIndel	8:61601400
24	CHD7	8	23408000	CHD7 (Breakpoint)	-:8:23408000|-:8:61605600	28	0.1	0	PossibleInversion	8:61605600
24	CHD7_RAB2A	8	61496400	CHD7_RAB2A (Breakpoint)	-:8:61601400|+:8:61496400	57	0.22	0	PossibleLargeIndel	8:61601400
24	CHD7_SLC25A37	8	23408000	CHD7_SLC25A37 (Breakpoint)	-:8:23408000|-:8:61605600	28	0.1	0	PossibleInversion	8:61605600
24	CNTN5	11	99432200	CNTN5 (Breakpoint)	-:11:88818800|-:11:99432200	50	0.25	0	PossibleInversion	11:88818800
24	CNTN5	11	99430800	CNTN5 (Breakpoint)	+:11:99430800|+:11:111959400	44	0.11	0	PossibleInversion	11:111959400
24	CNTN5	11	99745800	CNTN5 (Breakpoint)	-:11:99745800|-:11:109065600	25	0.16	0	PossibleInversion	11:109065600
24	CNTN5	11	99430800	CNTN5 (Breakpoint)	+:11:99430800|+:11:92701000	26	0.15	0	PossibleInversion	11:92701000
24	CNTN5	11	99430800	CNTN5 (Breakpoint)	-:11:114615200|+:11:99430800	33	0.2	0	PossibleLargeIndel	11:114615200
24	CNTN5	11	92702400	CNTN5 (Breakpoint)	+:11:92702400|+:11:99432200	20	0.13	0	PossibleInversion	11:99432200
24	CNTN5_SDHD	11	99430800	CNTN5_SDHD (Breakpoint)	+:11:99430800|+:11:111959400	44	0.11	0	PossibleInversion	11:111959400
24	COL24A1	1	86399600	COL24A1 (Breakpoint)	-:1:86403800|+:1:86399600	36	0.18	0	PossibleLargeIndel	1:86403800
24	DCUN1D5	11	78303400	DCUN1D5 (Breakpoint)	+:11:78303400|-:11:102942000	29	0.15	0	PossibleLargeIndel	11:102942000
24	DLG2	11	83193600	DLG2 (Breakpoint)	-:11:116025000|+:11:83193600	56	0.1	0	PossibleLargeIndel	11:116025000
24	DLG2	11	84078400	DLG2 (Breakpoint)	+:11:84078400|-:11:134038800	88	0.18	0	PossibleLargeIndel	11:134038800
24	DLG2	11	83195000	DLG2 (Breakpoint)	+:11:83195000|-:11:116027800	51	0.12	0	PossibleLargeIndel	11:116027800
24	DLG2	11	91813400	DLG2 (Breakpoint)	-:11:83827800|+:11:91813400	33	0.12	0	PossibleLargeIndel	11:83827800
24	DLG2	11	78178800	DLG2 (Breakpoint)	+:11:78178800|-:11:84677600	21	0.11	0	PossibleLargeIndel	11:84677600
24	DLG2_NCAPD3	11	84078400	DLG2_NCAPD3 (Breakpoint)	+:11:84078400|-:11:134038800	88	0.18	0	PossibleLargeIndel	11:134038800
24	DSCAML1	11	117653200	DSCAML1 (Breakpoint)	-:11:80431400|+:11:117653200	50	0.17	0	PossibleLargeIndel	11:80431400
24	EXPH5	11	126879200	EXPH5 (Breakpoint)	-:11:108427200|+:11:126879200	75	0.16	0	PossibleLargeIndel	11:108427200
24	EXPH5	11	108446800	EXPH5 (Breakpoint)	+:11:108446800|-:11:110394200	38	0.15	0	PossibleLargeIndel	11:110394200
24	EXPH5	11	108427200	EXPH5 (Breakpoint)	-:11:108445400|+:11:108427200	70	0.12	0	PossibleLargeIndel	11:108445400
24	EXPH5	11	108445400	EXPH5 (Breakpoint)	+:11:108445400|-:11:100889600	40	0.1	0	PossibleLargeIndel	11:100889600
24	FAM168A_ME3	11	86192400	FAM168A_ME3 (Breakpoint)	+:11:86192400|-:11:73245200	28	0.17	0	PossibleLargeIndel	11:73245200
24	FAT3	11	71307600	FAT3 (Breakpoint)	+:11:71307600|+:11:92513400	32	0.12	0	PossibleInversion	11:92513400
24	FAT3	11	106953000	FAT3 (Breakpoint)	-:11:92447600|+:11:106953000	54	0.17	0	PossibleLargeIndel	11:92447600
24	FAT3	11	79956800	FAT3 (Breakpoint)	-:11:92177400|+:11:79956800	21	0.12	0	PossibleLargeIndel	11:92177400
24	FBXL7	5	15717800	FBXL7 (Breakpoint)	+:5:15717800|-:5:15720600	41	0.2	0	PossibleLargeIndel	5:15720600
24	GAB2	11	77966000	GAB2 (Breakpoint)	+:11:77966000|-:11:129833200	87	0.24	0	PossibleLargeIndel	11:129833200
24	GAB2	11	86286200	GAB2 (Breakpoint)	+:11:86286200|-:11:78113000	26	0.17	0	PossibleLargeIndel	11:78113000
24	GAB2	11	78113000	GAB2 (Breakpoint)	-:11:92730400|+:11:78113000	20	0.15	0	PossibleLargeIndel	11:92730400
24	GAB2_ME3	11	86286200	GAB2_ME3 (Breakpoint)	+:11:86286200|-:11:78113000	26	0.17	0	PossibleLargeIndel	11:78113000
24	GAB2_PRDM10	11	77966000	GAB2_PRDM10 (Breakpoint)	+:11:77966000|-:11:129833200	87	0.24	0	PossibleLargeIndel	11:129833200
24	GHR	5	42627200	GHR (Breakpoint)	-:5:42630000|+:5:42627200	42	0.35	0	PossibleLargeIndel	5:42630000
24	GRAMD1B_PKNOX2	11	125112400	GRAMD1B_PKNOX2 (Breakpoint)	+:11:125112400|+:11:123446400	25	0.16	0	PossibleInversion	11:123446400
24	GRIA4	11	109477200	GRIA4 (Breakpoint)	-:11:105732200|+:11:109477200	56	0.19	0	PossibleLargeIndel	11:105732200
24	GRIK4	11	88818800	GRIK4 (Breakpoint)	+:11:88818800|+:11:120440600	235	0.63	0	PossibleInversion	11:120440600
24	GRIK4	11	120439200	GRIK4 (Breakpoint)	+:11:120439200|-:11:127202600	117	0.17	0	PossibleInversion	11:127202600
24	GRIK4	11	101148600	GRIK4 (Breakpoint)	-:11:101148600|+:11:120440600	34	0.12	0	PossibleTandemDup	11:120440600
24	GRIK4	11	120437800	GRIK4 (Breakpoint)	+:11:120437800|+:11:126879200	42	0.14	0	PossibleInversion	11:126879200
24	GRIK4	11	88202800	GRIK4 (Breakpoint)	+:11:88202800|-:11:120439200	41	0.15	0	PossibleLargeIndel	11:120439200
24	GRIK4	11	88204200	GRIK4 (Breakpoint)	-:11:120440600|+:11:88204200	40	0.25	0	PossibleLargeIndel	11:120440600
24	GRIK4	11	120439200	GRIK4 (Breakpoint)	-:11:120439200|-:11:111959400	54	0.11	0	PossibleInversion	11:111959400
24	GRIK4	11	120440600	GRIK4 (Breakpoint)	+:11:120440600|+:11:91813400	36	0.22	0	PossibleInversion	11:91813400
24	GRIK4	11	71279600	GRIK4 (Breakpoint)	+:11:71279600|-:11:120439200	55	0.19	0	PossibleLargeIndel	11:120439200
24	GRIK4	11	120439200	GRIK4 (Breakpoint)	-:11:83129200|+:11:120439200	53	0.15	0	PossibleLargeIndel	11:83129200
24	GRIK4	11	88839800	GRIK4 (Breakpoint)	+:11:88839800|+:11:120439200	32	0.15	0	PossibleInversion	11:120439200
24	GRIK4	11	81320400	GRIK4 (Breakpoint)	+:11:81320400|+:11:120439200	30	0.12	0	PossibleInversion	11:120439200
24	GRIK4	11	120439200	GRIK4 (Breakpoint)	-:11:87588200|+:11:120439200	38	0.17	0	PossibleLargeIndel	11:87588200
24	GRIK4	11	120439200	GRIK4 (Breakpoint)	-:11:80547600|+:11:120439200	29	0.1	0	PossibleLargeIndel	11:80547600
24	GRIK4	11	88799200	GRIK4 (Breakpoint)	-:11:88799200|-:11:120439200	21	0.11	0	PossibleInversion	11:120439200
24	GRIK4	11	81764200	GRIK4 (Breakpoint)	-:11:120437800|+:11:81764200	21	0.14	0	PossibleLargeIndel	11:120437800
24	GRIK4	11	120439200	GRIK4 (Breakpoint)	+:11:120439200|-:11:62928600	26	0.12	0	PossibleLargeIndel	11:62928600
24	GRIK4	11	109786600	GRIK4 (Breakpoint)	-:11:120439200|+:11:109786600	20	0.1	0	PossibleLargeIndel	11:120439200
24	GRIK4_KRTAP5-10	11	71279600	GRIK4_KRTAP5-10 (Breakpoint)	+:11:71279600|-:11:120439200	55	0.19	0	PossibleLargeIndel	11:120439200
24	GRIK4_SDHD	11	120439200	GRIK4_SDHD (Breakpoint)	-:11:120439200|-:11:111959400	54	0.11	0	PossibleInversion	11:111959400
24	GRIK4_SLC22A10	11	120439200	GRIK4_SLC22A10 (Breakpoint)	+:11:120439200|-:11:62928600	26	0.12	0	PossibleLargeIndel	11:62928600
24	GRM5	11	88799200	GRM5 (Breakpoint)	-:11:88799200|-:11:109064200	20	0.15	0	PossibleInversion	11:109064200
24	GRM5	11	88799200	GRM5 (Breakpoint)	+:11:88799200|-:11:126879200	28	0.1	0	PossibleInversion	11:126879200
24	GRM5	11	88799200	GRM5 (Breakpoint)	+:11:88799200|+:11:100875600	29	0.15	0	PossibleInversion	11:100875600
24	GRM5	11	107178400	GRM5 (Breakpoint)	-:11:88797800|-:11:107178400	25	0.13	0	PossibleInversion	11:88797800
24	GRM5	11	88799200	GRM5 (Breakpoint)	+:11:88799200|+:11:81319000	26	0.15	0	PossibleInversion	11:81319000
24	GRM5	11	88799200	GRM5 (Breakpoint)	+:11:88799200|-:11:92701000	23	0.14	0	PossibleLargeIndel	11:92701000
24	GRM5	11	88799200	GRM5 (Breakpoint)	+:11:88799200|-:11:114741200	20	0.14	0	PossibleLargeIndel	11:114741200
24	GRM5	11	88799200	GRM5 (Breakpoint)	+:11:88799200|-:11:134338400	23	0.14	0	PossibleLargeIndel	11:134338400
24	GRM5	11	88799200	GRM5 (Breakpoint)	-:11:88799200|-:11:120439200	21	0.11	0	PossibleInversion	11:120439200
24	GRM5	11	88799200	GRM5 (Breakpoint)	+:11:88799200|-:11:89084800	20	0.12	0	PossibleLargeIndel	11:89084800
24	HRASLS2	11	63327600	HRASLS2 (Breakpoint)	+:11:63327600|-:11:130369400	52	0.19	0	PossibleLargeIndel	11:130369400
24	IL18	11	112033600	IL18 (Breakpoint)	+:11:112033600|-:11:91810600	63	0.16	0	PossibleLargeIndel	11:91810600
24	IL18	11	123530400	IL18 (Breakpoint)	+:11:123530400|-:11:112033600	63	0.21	0	PossibleLargeIndel	11:112033600
24	IL18	11	109065600	IL18 (Breakpoint)	-:11:112033600|+:11:109065600	24	0.1	0	PossibleLargeIndel	11:112033600
24	INTS4	11	92981000	INTS4 (Breakpoint)	+:11:92981000|-:11:77683200	93	0.26	0	PossibleLargeIndel	11:77683200
24	INTS4	11	77686000	INTS4 (Breakpoint)	+:11:77686000|+:11:75418000	26	0.11	0	PossibleInversion	11:75418000
24	INTS4	11	75418000	INTS4 (Breakpoint)	-:11:77688800|+:11:75418000	25	0.13	0	PossibleLargeIndel	11:77688800
24	JAM3	11	133956200	JAM3 (Breakpoint)	+:11:133956200|+:11:102923800	48	0.2	0	PossibleInversion	11:102923800
24	JAM3	11	102925200	JAM3 (Breakpoint)	+:11:102925200|+:11:133957600	28	0.17	0	PossibleInversion	11:133957600
24	KIRREL3	11	126676200	KIRREL3 (Breakpoint)	+:11:126676200|+:11:127202600	58	0.1	0	PossibleInversion	11:127202600
24	KIRREL3	11	126670600	KIRREL3 (Breakpoint)	-:11:55476400|+:11:126670600	52	0.15	0	PossibleLargeIndel	11:55476400
24	KIRREL3	11	118164200	KIRREL3 (Breakpoint)	+:11:118164200|+:11:126673400	41	0.1	0	PossibleInversion	11:126673400
24	KIRREL3	11	126674800	KIRREL3 (Breakpoint)	+:11:126674800|+:11:118165600	37	0.13	0	PossibleInversion	11:118165600
24	KIRREL3	11	126676200	KIRREL3 (Breakpoint)	-:11:81320400|-:11:126676200	33	0.16	0	PossibleInversion	11:81320400
24	KIRREL3	11	126676200	KIRREL3 (Breakpoint)	-:11:126676200|-:11:126879200	39	0.12	0	PossibleInversion	11:126879200
24	KIRREL3	11	126676200	KIRREL3 (Breakpoint)	+:11:126676200|-:11:81764200	50	0.25	0	PossibleLargeIndel	11:81764200
24	KIRREL3	11	81321800	KIRREL3 (Breakpoint)	-:11:126677600|-:11:81321800	29	0.18	0	PossibleInversion	11:126677600
24	KIRREL3	11	126676200	KIRREL3 (Breakpoint)	-:11:126676200|-:11:134338400	24	0.12	0	PossibleInversion	11:134338400
24	KIRREL3	11	71041600	KIRREL3 (Breakpoint)	+:11:71041600|-:11:126676200	38	0.12	0	PossibleLargeIndel	11:126676200
24	KIRREL3	11	126676200	KIRREL3 (Breakpoint)	-:11:126676200|-:11:86196600	20	0.14	0	PossibleInversion	11:86196600
24	KIRREL3	11	92751400	KIRREL3 (Breakpoint)	+:11:92751400|-:11:126676200	30	0.12	0	PossibleLargeIndel	11:126676200
24	KIRREL3	11	71083600	KIRREL3 (Breakpoint)	-:11:126676200|+:11:71083600	35	0.18	0	PossibleLargeIndel	11:126676200
24	KIRREL3	11	75783400	KIRREL3 (Breakpoint)	-:11:126676200|+:11:75783400	32	0.15	0	PossibleLargeIndel	11:126676200
24	KIRREL3	11	126676200	KIRREL3 (Breakpoint)	+:11:126676200|-:11:83129200	32	0.11	0	PossibleLargeIndel	11:83129200
24	KIRREL3	11	100889600	KIRREL3 (Breakpoint)	-:11:126676200|+:11:100889600	20	0.12	0	PossibleLargeIndel	11:126676200
24	KIRREL3	11	126676200	KIRREL3 (Breakpoint)	+:11:126676200|-:11:114741200	24	0.14	0	PossibleLargeIndel	11:114741200
24	KIRREL3_UVRAG	11	75783400	KIRREL3_UVRAG (Breakpoint)	-:11:126676200|+:11:75783400	32	0.15	0	PossibleLargeIndel	11:126676200
24	KRTAP5-10	11	101147200	KRTAP5-10 (Breakpoint)	-:11:71279600|+:11:101147200	53	0.1	0	PossibleLargeIndel	11:71279600
24	KRTAP5-10	11	71279600	KRTAP5-10 (Breakpoint)	+:11:71279600|-:11:120439200	55	0.19	0	PossibleLargeIndel	11:120439200
24	KRTAP5-10_GRIK4	11	71279600	KRTAP5-10_GRIK4 (Breakpoint)	+:11:71279600|-:11:120439200	55	0.19	0	PossibleLargeIndel	11:120439200
24	KRTAP5-11	11	71307600	KRTAP5-11 (Breakpoint)	+:11:71307600|-:11:92751400	38	0.12	0	PossibleLargeIndel	11:92751400
24	KRTAP5-11	11	71307600	KRTAP5-11 (Breakpoint)	+:11:71307600|+:11:92513400	32	0.12	0	PossibleInversion	11:92513400
24	MAML2	11	95977000	MAML2 (Breakpoint)	+:11:95977000|+:11:118577200	54	0.3	0	PossibleInversion	11:118577200
24	ME3	11	75783400	ME3 (Breakpoint)	+:11:75783400|+:11:86286200	47	0.23	0	PossibleInversion	11:86286200
24	ME3	11	70911400	ME3 (Breakpoint)	-:11:70911400|-:11:86286200	40	0.15	0	PossibleInversion	11:86286200
24	ME3	11	126879200	ME3 (Breakpoint)	+:11:126879200|+:11:86286200	43	0.14	0	PossibleInversion	11:86286200
24	ME3	11	89084800	ME3 (Breakpoint)	-:11:89084800|-:11:86233000	25	0.13	0	PossibleInversion	11:86233000
24	ME3	11	86157400	ME3 (Breakpoint)	-:11:86157400|-:11:125112400	23	0.17	0	PossibleInversion	11:125112400
24	ME3	11	126676200	ME3 (Breakpoint)	-:11:126676200|-:11:86196600	20	0.14	0	PossibleInversion	11:86196600
24	ME3	11	86157400	ME3 (Breakpoint)	-:11:88839800|+:11:86157400	26	0.16	0	PossibleLargeIndel	11:88839800
24	ME3	11	86286200	ME3 (Breakpoint)	+:11:86286200|-:11:78113000	26	0.17	0	PossibleLargeIndel	11:78113000
24	ME3	11	86192400	ME3 (Breakpoint)	+:11:86192400|-:11:73245200	28	0.17	0	PossibleLargeIndel	11:73245200
24	ME3_FAM168A	11	86192400	ME3_FAM168A (Breakpoint)	+:11:86192400|-:11:73245200	28	0.17	0	PossibleLargeIndel	11:73245200
24	ME3_GAB2	11	86286200	ME3_GAB2 (Breakpoint)	+:11:86286200|-:11:78113000	26	0.17	0	PossibleLargeIndel	11:78113000
24	ME3_NOX4	11	89084800	ME3_NOX4 (Breakpoint)	-:11:89084800|-:11:86233000	25	0.13	0	PossibleInversion	11:86233000
24	ME3_SHANK2	11	70911400	ME3_SHANK2 (Breakpoint)	-:11:70911400|-:11:86286200	40	0.15	0	PossibleInversion	11:86286200
24	ME3_UVRAG	11	75783400	ME3_UVRAG (Breakpoint)	+:11:75783400|+:11:86286200	47	0.23	0	PossibleInversion	11:86286200
24	MS4A4A	11	91812000	MS4A4A (Breakpoint)	-:11:91812000|-:11:60071200	33	0.1	0	PossibleInversion	11:60071200
24	NARS2	11	78282400	NARS2 (Breakpoint)	-:11:115337600|-:11:78282400	39	0.1	0	PossibleInversion	11:115337600
24	NARS2	11	121079000	NARS2 (Breakpoint)	+:11:121079000|-:11:78272600	52	0.2	0	PossibleLargeIndel	11:78272600
24	NARS2	11	78178800	NARS2 (Breakpoint)	+:11:78178800|-:11:84677600	21	0.11	0	PossibleLargeIndel	11:84677600
24	NARS2_CADM1	11	78282400	NARS2_CADM1 (Breakpoint)	-:11:115337600|-:11:78282400	39	0.1	0	PossibleInversion	11:115337600
24	NCAPD3	11	84078400	NCAPD3 (Breakpoint)	+:11:84078400|-:11:134038800	88	0.18	0	PossibleLargeIndel	11:134038800
24	NCAPD3_DLG2	11	84078400	NCAPD3_DLG2 (Breakpoint)	+:11:84078400|-:11:134038800	88	0.18	0	PossibleLargeIndel	11:134038800
24	NOX4	11	89083400	NOX4 (Breakpoint)	+:11:89083400|-:11:111959400	54	0.12	0	PossibleLargeIndel	11:111959400
24	NOX4	11	89084800	NOX4 (Breakpoint)	-:11:91812000|+:11:89084800	39	0.11	0	PossibleLargeIndel	11:91812000
24	NOX4	11	107177000	NOX4 (Breakpoint)	+:11:107177000|-:11:89084800	55	0.17	0	PossibleLargeIndel	11:89084800
24	NOX4	11	89084800	NOX4 (Breakpoint)	-:11:89084800|-:11:86233000	25	0.13	0	PossibleInversion	11:86233000
24	NOX4	11	89086200	NOX4 (Breakpoint)	+:11:89086200|+:11:88204200	25	0.18	0	PossibleInversion	11:88204200
24	NOX4	11	89084800	NOX4 (Breakpoint)	+:11:89084800|-:11:71409800	29	0.19	0	PossibleLargeIndel	11:71409800
24	NOX4	11	89084800	NOX4 (Breakpoint)	+:11:89084800|-:11:75783400	22	0.11	0	PossibleLargeIndel	11:75783400
24	NOX4	11	88799200	NOX4 (Breakpoint)	+:11:88799200|-:11:89084800	20	0.12	0	PossibleLargeIndel	11:89084800
24	NOX4_ME3	11	89084800	NOX4_ME3 (Breakpoint)	-:11:89084800|-:11:86233000	25	0.13	0	PossibleInversion	11:86233000
24	NOX4_SDHD	11	89083400	NOX4_SDHD (Breakpoint)	+:11:89083400|-:11:111959400	54	0.12	0	PossibleLargeIndel	11:111959400
24	NRXN3	14	80105200	NRXN3 (Breakpoint)	+:14:80105200|-:14:80115000	40	0.22	0	PossibleLargeIndel	14:80115000
24	NTM	11	116193000	NTM (Breakpoint)	-:11:131290600|-:11:116193000	54	0.16	0	PossibleInversion	11:131290600
24	NTM	11	131297600	NTM (Breakpoint)	-:11:72934400|+:11:131297600	43	0.18	0	PossibleLargeIndel	11:72934400
24	NTM	11	131707800	NTM (Breakpoint)	+:11:131707800|-:11:65741200	40	0.1	0	PossibleLargeIndel	11:65741200
24	NTM	11	131299000	NTM (Breakpoint)	+:11:131299000|-:11:72937200	29	0.11	0	PossibleLargeIndel	11:72937200
24	NTM	11	131289200	NTM (Breakpoint)	-:11:116193000|-:11:131289200	28	0.11	0	PossibleInversion	11:116193000
24	NTM	11	131794600	NTM (Breakpoint)	+:11:131794600|-:11:72349200	24	0.14	0	PossibleLargeIndel	11:72349200
24	NTM_P2RY2	11	131297600	NTM_P2RY2 (Breakpoint)	-:11:72934400|+:11:131297600	43	0.18	0	PossibleLargeIndel	11:72934400
24	NTM_SART1	11	131707800	NTM_SART1 (Breakpoint)	+:11:131707800|-:11:65741200	40	0.1	0	PossibleLargeIndel	11:65741200
24	OPCML	11	55963600	OPCML (Breakpoint)	-:11:133190400|+:11:55963600	105	0.23	0	PossibleLargeIndel	11:133190400
24	OR52A1	11	5175800	OR52A1 (Breakpoint)	+:11:5175800|-:11:4639600	32	0.11	0	PossibleLargeIndel	11:4639600
24	P2RY2	11	131297600	P2RY2 (Breakpoint)	-:11:72934400|+:11:131297600	43	0.18	0	PossibleLargeIndel	11:72934400
24	P2RY2	11	131299000	P2RY2 (Breakpoint)	+:11:131299000|-:11:72937200	29	0.11	0	PossibleLargeIndel	11:72937200
24	P2RY2_NTM	11	131297600	P2RY2_NTM (Breakpoint)	-:11:72934400|+:11:131297600	43	0.18	0	PossibleLargeIndel	11:72934400
24	PBLD	10	70067200	PBLD (Breakpoint)	+:10:70067200|-:10:70070000	34	0.22	0	PossibleLargeIndel	10:70070000
24	PCCA	13	101157000	PCCA (Breakpoint)	-:13:101161200|+:13:101157000	29	0.16	0	PossibleLargeIndel	13:101161200
24	PCDHA1	5	140221200	PCDHA1 (Breakpoint)	-:5:140238000|+:5:140221200	26	0.18	0	PossibleLargeIndel	5:140238000
24	PCDHA10	5	140221200	PCDHA10 (Breakpoint)	-:5:140238000|+:5:140221200	26	0.18	0	PossibleLargeIndel	5:140238000
24	PCDHA2	5	140221200	PCDHA2 (Breakpoint)	-:5:140238000|+:5:140221200	26	0.18	0	PossibleLargeIndel	5:140238000
24	PCDHA3	5	140221200	PCDHA3 (Breakpoint)	-:5:140238000|+:5:140221200	26	0.18	0	PossibleLargeIndel	5:140238000
24	PCDHA4	5	140221200	PCDHA4 (Breakpoint)	-:5:140238000|+:5:140221200	26	0.18	0	PossibleLargeIndel	5:140238000
24	PCDHA5	5	140221200	PCDHA5 (Breakpoint)	-:5:140238000|+:5:140221200	26	0.18	0	PossibleLargeIndel	5:140238000
24	PCDHA6	5	140221200	PCDHA6 (Breakpoint)	-:5:140238000|+:5:140221200	26	0.18	0	PossibleLargeIndel	5:140238000
24	PCDHA7	5	140221200	PCDHA7 (Breakpoint)	-:5:140238000|+:5:140221200	26	0.18	0	PossibleLargeIndel	5:140238000
24	PCDHA8	5	140221200	PCDHA8 (Breakpoint)	-:5:140238000|+:5:140221200	26	0.18	0	PossibleLargeIndel	5:140238000
24	PCDHA9	5	140221200	PCDHA9 (Breakpoint)	-:5:140238000|+:5:140221200	26	0.18	0	PossibleLargeIndel	5:140238000
24	PDGFD	11	101011400	PDGFD (Breakpoint)	-:11:103986400|-:11:101011400	30	0.11	0	PossibleInversion	11:103986400
24	PDGFD	11	101164000	PDGFD (Breakpoint)	-:11:103780600|+:11:101164000	24	0.1	0	PossibleLargeIndel	11:103780600
24	PDK4	7	95200000	PDK4 (Breakpoint)	-:7:95222400|+:7:95200000	37	0.16	0	PossibleLargeIndel	7:95222400
24	PKNOX2	11	125112400	PKNOX2 (Breakpoint)	-:11:112779800|+:11:125112400	22	0.14	0	PossibleLargeIndel	11:112779800
24	PKNOX2	11	125112400	PKNOX2 (Breakpoint)	+:11:125112400|+:11:123446400	25	0.16	0	PossibleInversion	11:123446400
24	PKNOX2	11	86157400	PKNOX2 (Breakpoint)	-:11:86157400|-:11:125112400	23	0.17	0	PossibleInversion	11:125112400
24	PKNOX2	11	125301400	PKNOX2 (Breakpoint)	-:11:65679600|-:11:125301400	21	0.16	0	PossibleInversion	11:65679600
24	PKNOX2	11	68285000	PKNOX2 (Breakpoint)	-:11:125301400|+:11:68285000	29	0.13	0	PossibleLargeIndel	11:125301400
24	PKNOX2	11	125112400	PKNOX2 (Breakpoint)	-:11:134338400|+:11:125112400	22	0.13	0	PossibleLargeIndel	11:134338400
24	PKNOX2	11	115679200	PKNOX2 (Breakpoint)	+:11:115679200|-:11:125112400	22	0.15	0	PossibleLargeIndel	11:125112400
24	PKNOX2	11	98557200	PKNOX2 (Breakpoint)	+:11:98557200|-:11:125112400	20	0.12	0	PossibleLargeIndel	11:125112400
24	PKNOX2_GRAMD1B	11	125112400	PKNOX2_GRAMD1B (Breakpoint)	+:11:125112400|+:11:123446400	25	0.16	0	PossibleInversion	11:123446400
24	PKNOX2_PPP6R3	11	68285000	PKNOX2_PPP6R3 (Breakpoint)	-:11:125301400|+:11:68285000	29	0.13	0	PossibleLargeIndel	11:125301400
24	PPP6R3_PKNOX2	11	68285000	PPP6R3_PKNOX2 (Breakpoint)	-:11:125301400|+:11:68285000	29	0.13	0	PossibleLargeIndel	11:125301400
24	PRDM10	11	77966000	PRDM10 (Breakpoint)	+:11:77966000|-:11:129833200	87	0.24	0	PossibleLargeIndel	11:129833200
24	PRDM10_GAB2	11	77966000	PRDM10_GAB2 (Breakpoint)	+:11:77966000|-:11:129833200	87	0.24	0	PossibleLargeIndel	11:129833200
24	PRSS23	11	86563400	PRSS23 (Breakpoint)	+:11:86563400|-:11:121079000	31	0.16	0	PossibleLargeIndel	11:121079000
24	RAB2A	8	61496400	RAB2A (Breakpoint)	-:8:61601400|+:8:61496400	57	0.22	0	PossibleLargeIndel	8:61601400
24	RAB2A_CHD7	8	61496400	RAB2A_CHD7 (Breakpoint)	-:8:61601400|+:8:61496400	57	0.22	0	PossibleLargeIndel	8:61601400
24	REEP5	5	112222600	REEP5 (Breakpoint)	+:5:112222600|-:5:112226800	51	0.26	0	PossibleLargeIndel	5:112226800
24	SART1	11	131707800	SART1 (Breakpoint)	+:11:131707800|-:11:65741200	40	0.1	0	PossibleLargeIndel	11:65741200
24	SART1_NTM	11	131707800	SART1_NTM (Breakpoint)	+:11:131707800|-:11:65741200	40	0.1	0	PossibleLargeIndel	11:65741200
24	SDHD	11	88818800	SDHD (Breakpoint)	+:11:88818800|-:11:111960800	421	0.61	0	PossibleLargeIndel	11:111960800
24	SDHD	11	111959400	SDHD (Breakpoint)	-:11:111959400|-:11:88817400	298	0.1	0	PossibleInversion	11:88817400
24	SDHD	11	111959400	SDHD (Breakpoint)	-:11:111959400|-:11:127202600	212	0.22	0	PossibleInversion	11:127202600
24	SDHD	11	111959400	SDHD (Breakpoint)	+:11:111959400|-:11:101147200	121	0.15	0	PossibleInversion	11:101147200
24	SDHD	11	91810600	SDHD (Breakpoint)	-:11:91810600|+:11:111959400	71	0.12	0	PossibleInversion	11:111959400
24	SDHD	11	91812000	SDHD (Breakpoint)	+:11:91812000|-:11:111959400	90	0.15	0	PossibleLargeIndel	11:111959400
24	SDHD	11	89083400	SDHD (Breakpoint)	+:11:89083400|-:11:111959400	54	0.12	0	PossibleLargeIndel	11:111959400
24	SDHD	11	111960800	SDHD (Breakpoint)	+:11:111960800|-:11:98560000	51	0.16	0	PossibleLargeIndel	11:98560000
24	SDHD	11	111959400	SDHD (Breakpoint)	+:11:111959400|+:11:134338400	65	0.14	0	PossibleInversion	11:134338400
24	SDHD	11	126879200	SDHD (Breakpoint)	+:11:126879200|+:11:111959400	55	0.1	0	PossibleInversion	11:111959400
24	SDHD	11	88902800	SDHD (Breakpoint)	+:11:88902800|+:11:111959400	69	0.1	0	PossibleInversion	11:111959400
24	SDHD	11	120439200	SDHD (Breakpoint)	-:11:120439200|-:11:111959400	54	0.11	0	PossibleInversion	11:111959400
24	SDHD	11	99430800	SDHD (Breakpoint)	+:11:99430800|+:11:111959400	44	0.11	0	PossibleInversion	11:111959400
24	SDHD	11	112033600	SDHD (Breakpoint)	+:11:112033600|-:11:91810600	63	0.16	0	PossibleLargeIndel	11:91810600
24	SDHD	11	123530400	SDHD (Breakpoint)	+:11:123530400|-:11:112033600	63	0.21	0	PossibleLargeIndel	11:112033600
24	SDHD	11	88975600	SDHD (Breakpoint)	+:11:88975600|-:11:111959400	39	0.1	0	PossibleLargeIndel	11:111959400
24	SDHD	11	110394200	SDHD (Breakpoint)	-:11:110394200|-:11:111959400	46	0.1	0	PossibleInversion	11:111959400
24	SDHD	11	87588200	SDHD (Breakpoint)	+:11:87588200|-:11:111994400	54	0.16	0	PossibleLargeIndel	11:111994400
24	SDHD	11	107179800	SDHD (Breakpoint)	-:11:111960800|-:11:107179800	27	0.1	0	PossibleInversion	11:111960800
24	SDHD	11	111959400	SDHD (Breakpoint)	+:11:111959400|-:11:71083600	47	0.11	0	PossibleLargeIndel	11:71083600
24	SDHD	11	81785200	SDHD (Breakpoint)	-:11:81785200|-:11:111959400	41	0.1	0	PossibleInversion	11:111959400
24	SDHD	11	111995800	SDHD (Breakpoint)	-:11:81319000|+:11:111995800	31	0.1	0	PossibleLargeIndel	11:81319000
24	SDHD	11	111995800	SDHD (Breakpoint)	+:11:111995800|-:11:71409800	25	0.1	0	PossibleLargeIndel	11:71409800
24	SDHD	11	109065600	SDHD (Breakpoint)	-:11:112033600|+:11:109065600	24	0.1	0	PossibleLargeIndel	11:112033600
24	SDHD_CNTN5	11	99430800	SDHD_CNTN5 (Breakpoint)	+:11:99430800|+:11:111959400	44	0.11	0	PossibleInversion	11:111959400
24	SDHD_GRIK4	11	120439200	SDHD_GRIK4 (Breakpoint)	-:11:120439200|-:11:111959400	54	0.11	0	PossibleInversion	11:111959400
24	SDHD_NOX4	11	89083400	SDHD_NOX4 (Breakpoint)	+:11:89083400|-:11:111959400	54	0.12	0	PossibleLargeIndel	11:111959400
24	SDHD_TYR	11	88975600	SDHD_TYR (Breakpoint)	+:11:88975600|-:11:111959400	39	0.1	0	PossibleLargeIndel	11:111959400
24	SHANK2	11	126879200	SHANK2 (Breakpoint)	-:11:70911400|+:11:126879200	144	0.28	0	PossibleLargeIndel	11:70911400
24	SHANK2	11	70911400	SHANK2 (Breakpoint)	-:11:70911400|-:11:86286200	40	0.15	0	PossibleInversion	11:86286200
24	SHANK2_ME3	11	70911400	SHANK2_ME3 (Breakpoint)	-:11:70911400|-:11:86286200	40	0.15	0	PossibleInversion	11:86286200
24	SLC22A10	11	100875600	SLC22A10 (Breakpoint)	+:11:100875600|+:11:62927200	33	0.17	0	PossibleInversion	11:62927200
24	SLC22A10	11	62927200	SLC22A10 (Breakpoint)	+:11:62927200|-:11:123530400	30	0.16	0	PossibleLargeIndel	11:123530400
24	SLC22A10	11	120439200	SLC22A10 (Breakpoint)	+:11:120439200|-:11:62928600	26	0.12	0	PossibleLargeIndel	11:62928600
24	SLC22A10	11	62927200	SLC22A10 (Breakpoint)	+:11:62927200|-:11:114616600	26	0.12	0	PossibleLargeIndel	11:114616600
24	SLC22A10_GRIK4	11	120439200	SLC22A10_GRIK4 (Breakpoint)	+:11:120439200|-:11:62928600	26	0.12	0	PossibleLargeIndel	11:62928600
24	SLC25A37	8	23408000	SLC25A37 (Breakpoint)	-:8:23408000|-:8:61605600	28	0.1	0	PossibleInversion	8:61605600
24	SLC25A37_CHD7	8	23408000	SLC25A37_CHD7 (Breakpoint)	-:8:23408000|-:8:61605600	28	0.1	0	PossibleInversion	8:61605600
24	SLC4A10	2	162332800	SLC4A10 (Breakpoint)	+:2:162332800|-:2:162335600	32	0.23	0	PossibleLargeIndel	2:162335600
24	TENM4	11	78806000	TENM4 (Breakpoint)	-:11:123702600|-:11:78806000	27	0.1	0	PossibleInversion	11:123702600
24	TENM4	11	114616600	TENM4 (Breakpoint)	-:11:78729000|+:11:114616600	40	0.18	0	PossibleLargeIndel	11:78729000
24	TRPM1	15	31361400	TRPM1 (Breakpoint)	-:15:31365600|+:15:31361400	56	0.29	0	PossibleLargeIndel	15:31365600
24	TSPAN8	12	71789200	TSPAN8 (Breakpoint)	+:12:71789200|-:12:71797600	37	0.19	0	PossibleLargeIndel	12:71797600
24	TYR	11	88975600	TYR (Breakpoint)	+:11:88975600|-:11:111959400	39	0.1	0	PossibleLargeIndel	11:111959400
24	TYR	11	88975600	TYR (Breakpoint)	+:11:88975600|-:11:80547600	25	0.11	0	PossibleLargeIndel	11:80547600
24	TYR_SDHD	11	88975600	TYR_SDHD (Breakpoint)	+:11:88975600|-:11:111959400	39	0.1	0	PossibleLargeIndel	11:111959400
24	UVRAG	11	91810600	UVRAG (Breakpoint)	+:11:91810600|+:11:75783400	74	0.2	0	PossibleInversion	11:75783400
24	UVRAG	11	75784800	UVRAG (Breakpoint)	+:11:75784800|+:11:91813400	52	0.27	0	PossibleInversion	11:91813400
24	UVRAG	11	75783400	UVRAG (Breakpoint)	+:11:75783400|+:11:86286200	47	0.23	0	PossibleInversion	11:86286200
24	UVRAG	11	129385200	UVRAG (Breakpoint)	+:11:129385200|-:11:75783400	70	0.16	0	PossibleLargeIndel	11:75783400
24	UVRAG	11	75783400	UVRAG (Breakpoint)	-:11:114804200|+:11:75783400	63	0.19	0	PossibleLargeIndel	11:114804200
24	UVRAG	11	75612600	UVRAG (Breakpoint)	-:11:75612600|+:11:126879200	43	0.12	0	PossibleInversion	11:126879200
24	UVRAG	11	71041600	UVRAG (Breakpoint)	+:11:71041600|-:11:75783400	48	0.14	0	PossibleLargeIndel	11:75783400
24	UVRAG	11	75612600	UVRAG (Breakpoint)	+:11:75612600|-:11:98558600	50	0.18	0	PossibleLargeIndel	11:98558600
24	UVRAG	11	112779800	UVRAG (Breakpoint)	+:11:112779800|+:11:75783400	21	0.11	0	PossibleInversion	11:75783400
24	UVRAG	11	100875600	UVRAG (Breakpoint)	-:11:75783400|+:11:100875600	34	0.15	0	PossibleLargeIndel	11:75783400
24	UVRAG	11	75783400	UVRAG (Breakpoint)	-:11:126676200|+:11:75783400	32	0.15	0	PossibleLargeIndel	11:126676200
24	UVRAG	11	89084800	UVRAG (Breakpoint)	+:11:89084800|-:11:75783400	22	0.11	0	PossibleLargeIndel	11:75783400
24	UVRAG	11	75612600	UVRAG (Breakpoint)	-:11:75878600|+:11:75612600	25	0.11	0	PossibleLargeIndel	11:75878600
24	UVRAG	11	109065600	UVRAG (Breakpoint)	+:11:109065600|-:11:75783400	28	0.15	0	PossibleLargeIndel	11:75783400
24	UVRAG	11	75783400	UVRAG (Breakpoint)	-:11:75612600|+:11:75783400	27	0.11	0	PossibleLargeIndel	11:75612600
24	UVRAG	11	75783400	UVRAG (Breakpoint)	-:11:81905600|+:11:75783400	26	0.15	0	PossibleLargeIndel	11:81905600
24	UVRAG	11	75783400	UVRAG (Breakpoint)	-:11:134338400|+:11:75783400	22	0.11	0	PossibleLargeIndel	11:134338400
24	UVRAG	11	87588200	UVRAG (Breakpoint)	-:11:75783400|+:11:87588200	24	0.13	0	PossibleLargeIndel	11:75783400
24	UVRAG	11	75612600	UVRAG (Breakpoint)	+:11:75612600|-:11:112351400	20	0.1	0	PossibleLargeIndel	11:112351400
24	UVRAG_KIRREL3	11	75783400	UVRAG_KIRREL3 (Breakpoint)	-:11:126676200|+:11:75783400	32	0.15	0	PossibleLargeIndel	11:126676200
24	UVRAG_ME3	11	75783400	UVRAG_ME3 (Breakpoint)	+:11:75783400|+:11:86286200	47	0.23	0	PossibleInversion	11:86286200
24	XRRA1	11	123313400	XRRA1 (Breakpoint)	+:11:123313400|-:11:74564000	45	0.19	0	PossibleLargeIndel	11:74564000
24	XRRA1	11	123316200	XRRA1 (Breakpoint)	-:11:74565400|+:11:123316200	21	0.1	0	PossibleLargeIndel	11:74565400
24	ZC3H18	16	88636800	ZC3H18 (Breakpoint)	-:16:88641000|+:16:88636800	27	0.16	0	PossibleLargeIndel	16:88641000
24	ZNF438	10	31245200	ZNF438 (Breakpoint)	-:10:31250800|+:10:31245200	36	0.2	0	PossibleLargeIndel	10:31250800
24	ZSCAN5A	19	56865200	ZSCAN5A (Breakpoint)	-:19:56869400|+:19:56865200	34	0.2	0	PossibleLargeIndel	19:56869400
26	ADCY2	14	73362800	ADCY2 (Breakpoint)	-:5:7746200|+:14:73362800	67	0.24	0	Translocation	5:7746200
26	ADCY2	14	73364200	ADCY2 (Breakpoint)	+:14:73364200|-:5:7749000	49	0.14	0	Translocation	5:7749000
26	ADCY2	5	7798000	ADCY2 (Breakpoint)	+:5:7798000|+:5:1331400	40	0.11	0	PossibleInversion	5:1331400
26	ADCY2_CLPTM1L	5	7798000	ADCY2_CLPTM1L (Breakpoint)	+:5:7798000|+:5:1331400	40	0.11	0	PossibleInversion	5:1331400
26	AGAP1	2	236502000	AGAP1 (Breakpoint)	+:2:236502000|-:4:182824600	36	0.2	0	Translocation	4:182824600
26	AGAP1	4	182674800	AGAP1 (Breakpoint)	+:4:182674800|-:2:236619600	22	0.13	0	Translocation	2:236619600
26	ANKRD28	3	15843800	ANKRD28 (Breakpoint)	-:3:15846600|+:3:15843800	38	0.16	0	PossibleLargeIndel	3:15846600
26	APC	5	114685200	APC (Breakpoint)	+:5:114685200|-:5:112140000	95	0.12	0	PossibleLargeIndel	5:112140000
26	BASP1	5	17141600	BASP1 (Breakpoint)	-:5:11267200|-:5:17141600	54	0.16	0	PossibleInversion	5:11267200
26	BASP1	5	17168200	BASP1 (Breakpoint)	-:14:62085800|+:5:17168200	90	0.24	0	Translocation	14:62085800
26	BASP1	5	11265800	BASP1 (Breakpoint)	-:5:17141600|-:5:11265800	48	0.2	0	PossibleInversion	5:17141600
26	BASP1_CTNND2	5	17141600	BASP1_CTNND2 (Breakpoint)	-:5:11267200|-:5:17141600	54	0.16	0	PossibleInversion	5:11267200
26	BASP1_CTNND2	5	11265800	BASP1_CTNND2 (Breakpoint)	-:5:17141600|-:5:11265800	48	0.2	0	PossibleInversion	5:17141600
26	C14orf37	14	74069800	C14orf37 (Breakpoint)	+:14:74069800|-:14:58514400	33	0.1	0	PossibleLargeIndel	14:58514400
26	C5orf22	5	31994200	C5orf22 (Breakpoint)	+:5:31994200|-:5:31551800	126	0.27	0	PossibleLargeIndel	5:31551800
26	C5orf22	5	24865400	C5orf22 (Breakpoint)	+:5:24865400|+:5:31551800	47	0.15	0	PossibleInversion	5:31551800
26	C5orf22_PDZD2	5	31994200	C5orf22_PDZD2 (Breakpoint)	+:5:31994200|-:5:31551800	126	0.27	0	PossibleLargeIndel	5:31551800
26	CHPT1	12	102100600	CHPT1 (Breakpoint)	+:12:102100600|-:12:102106200	37	0.17	0	PossibleLargeIndel	12:102106200
26	CLPTM1L	5	7798000	CLPTM1L (Breakpoint)	+:5:7798000|+:5:1331400	40	0.11	0	PossibleInversion	5:1331400
26	CLPTM1L_ADCY2	5	7798000	CLPTM1L_ADCY2 (Breakpoint)	+:5:7798000|+:5:1331400	40	0.11	0	PossibleInversion	5:1331400
26	CNIH1	5	28579600	CNIH1 (Breakpoint)	-:14:54902400|+:5:28579600	84	0.17	0	Translocation	14:54902400
26	CNIH1	5	28581000	CNIH1 (Breakpoint)	+:5:28581000|-:14:54905200	50	0.11	0	Translocation	14:54905200
26	CNIH1	5	18788000	CNIH1 (Breakpoint)	-:14:54896800|-:5:18788000	32	0.11	0	Translocation	14:54896800
26	CPNE4	3	131987800	CPNE4 (Breakpoint)	+:3:131987800|-:3:131994800	42	0.27	0	PossibleLargeIndel	3:131994800
26	CSNK1G3	5	117898200	CSNK1G3 (Breakpoint)	-:5:122946600|+:5:117898200	192	0.25	0	PossibleLargeIndel	5:122946600
26	CTNND2	5	17141600	CTNND2 (Breakpoint)	-:5:11267200|-:5:17141600	54	0.16	0	PossibleInversion	5:11267200
26	CTNND2	5	11356800	CTNND2 (Breakpoint)	+:5:11356800|-:14:79353400	107	0.27	0	Translocation	14:79353400
26	CTNND2	5	11265800	CTNND2 (Breakpoint)	-:5:17141600|-:5:11265800	48	0.2	0	PossibleInversion	5:17141600
26	CTNND2	5	11356800	CTNND2 (Breakpoint)	+:5:11356800|+:5:9927400	28	0.13	0	PossibleInversion	5:9927400
26	CTNND2	5	9928800	CTNND2 (Breakpoint)	+:5:9928800|+:5:11358200	25	0.17	0	PossibleInversion	5:11358200
26	CTNND2_BASP1	5	17141600	CTNND2_BASP1 (Breakpoint)	-:5:11267200|-:5:17141600	54	0.16	0	PossibleInversion	5:11267200
26	CTNND2_BASP1	5	11265800	CTNND2_BASP1 (Breakpoint)	-:5:17141600|-:5:11265800	48	0.2	0	PossibleInversion	5:17141600
26	CTNND2_NRXN3	5	11356800	CTNND2_NRXN3 (Breakpoint)	+:5:11356800|-:14:79353400	107	0.27	0	Translocation	14:79353400
26	DCAF4	14	78685600	DCAF4 (Breakpoint)	+:14:78685600|-:14:73409000	43	0.13	0	PossibleLargeIndel	14:73409000
26	DCAF4	5	4981200	DCAF4 (Breakpoint)	+:5:4981200|+:14:73395000	37	0.13	0	Translocation	14:73395000
26	DCAF4	14	78688400	DCAF4 (Breakpoint)	-:14:73410400|+:14:78688400	36	0.14	0	PossibleLargeIndel	14:73410400
26	DCAF4	14	73396400	DCAF4 (Breakpoint)	+:14:73396400|+:5:4979800	35	0.12	0	Translocation	5:4979800
26	DCDC2	6	24323600	DCDC2 (Breakpoint)	+:6:24323600|-:6:24327800	38	0.18	0	PossibleLargeIndel	6:24327800
26	DLG1	3	196932400	DLG1 (Breakpoint)	+:3:196932400|-:3:196938000	52	0.27	0	PossibleLargeIndel	3:196938000
26	DNAAF2	14	50099000	DNAAF2 (Breakpoint)	-:5:8741600|+:14:50099000	104	0.25	0	Translocation	5:8741600
26	DPF3	14	74440800	DPF3 (Breakpoint)	-:14:73220000|+:14:74440800	57	0.23	0	PossibleLargeIndel	14:73220000
26	DPF3	14	74442200	DPF3 (Breakpoint)	+:14:74442200|-:14:73222800	37	0.22	0	PossibleLargeIndel	14:73222800
26	DPF3_ENTPD5	14	74440800	DPF3_ENTPD5 (Breakpoint)	-:14:73220000|+:14:74440800	57	0.23	0	PossibleLargeIndel	14:73220000
26	EFCAB11	5	9496200	EFCAB11 (Breakpoint)	-:14:90365800|+:5:9496200	90	0.26	0	Translocation	14:90365800
26	EFCAB11	5	9497600	EFCAB11 (Breakpoint)	+:5:9497600|-:14:90368600	55	0.29	0	Translocation	14:90368600
26	EFCAB11	14	90308400	EFCAB11 (Breakpoint)	-:14:90767600|+:14:90308400	87	0.34	0	PossibleLargeIndel	14:90767600
26	EFCAB11	14	90809600	EFCAB11 (Breakpoint)	+:14:90809600|-:14:90308400	49	0.32	0	PossibleLargeIndel	14:90308400
26	EFCAB11	14	90367200	EFCAB11 (Breakpoint)	+:14:90367200|+:5:974400	20	0.12	0	Translocation	5:974400
26	EFCAB11_NRDE2	14	90308400	EFCAB11_NRDE2 (Breakpoint)	-:14:90767600|+:14:90308400	87	0.34	0	PossibleLargeIndel	14:90767600
26	EFCAB11_SEMA5A	5	9496200	EFCAB11_SEMA5A (Breakpoint)	-:14:90365800|+:5:9496200	90	0.26	0	Translocation	14:90365800
26	EGLN3	14	34825000	EGLN3 (Breakpoint)	-:14:34837600|+:14:34825000	33	0.12	0	PossibleLargeIndel	14:34837600
26	ELMSAN1	14	80071600	ELMSAN1 (Breakpoint)	+:14:80071600|+:14:74212600	38	0.15	0	PossibleInversion	14:74212600
26	ELMSAN1_NRXN3	14	80071600	ELMSAN1_NRXN3 (Breakpoint)	+:14:80071600|+:14:74212600	38	0.15	0	PossibleInversion	14:74212600
26	ENTPD5	14	74440800	ENTPD5 (Breakpoint)	-:14:73220000|+:14:74440800	57	0.23	0	PossibleLargeIndel	14:73220000
26	ENTPD5	14	74442200	ENTPD5 (Breakpoint)	+:14:74442200|-:14:73222800	37	0.22	0	PossibleLargeIndel	14:73222800
26	ENTPD5_DPF3	14	74440800	ENTPD5_DPF3 (Breakpoint)	-:14:73220000|+:14:74440800	57	0.23	0	PossibleLargeIndel	14:73220000
26	EYA3	4	154067200	EYA3 (Breakpoint)	-:4:154067200|-:1:28347200	27	0.13	0	Translocation	1:28347200
26	EYS	6	64666000	EYS (Breakpoint)	-:6:64668800|+:6:64666000	30	0.16	0	PossibleLargeIndel	6:64668800
26	FAM160A1	4	152551000	FAM160A1 (Breakpoint)	+:4:152551000|-:4:152542600	30	0.11	0	PossibleLargeIndel	4:152542600
26	FAM161B_NRXN3	14	79209200	FAM161B_NRXN3 (Breakpoint)	-:14:74404400|+:14:79209200	32	0.15	0	PossibleLargeIndel	14:74404400
26	FER	5	131418000	FER (Breakpoint)	-:5:131418000|-:5:108434200	88	0.12	0	PossibleInversion	5:108434200
26	FER	5	113754200	FER (Breakpoint)	+:5:113754200|+:5:108280200	76	0.1	0	PossibleInversion	5:108280200
26	FER	5	108340400	FER (Breakpoint)	-:5:113754200|-:5:108340400	68	0.12	0	PossibleInversion	5:113754200
26	FER	5	124434800	FER (Breakpoint)	+:5:124434800|-:5:108372600	91	0.13	0	PossibleLargeIndel	5:108372600
26	FER_KCNN2	5	113754200	FER_KCNN2 (Breakpoint)	+:5:113754200|+:5:108280200	76	0.1	0	PossibleInversion	5:108280200
26	FER_KCNN2	5	108340400	FER_KCNN2 (Breakpoint)	-:5:113754200|-:5:108340400	68	0.12	0	PossibleInversion	5:113754200
26	GRAMD3	5	103388600	GRAMD3 (Breakpoint)	-:5:125736800|-:5:103388600	94	0.11	0	PossibleInversion	5:125736800
26	HCN1	5	45539200	HCN1 (Breakpoint)	-:14:29394400|+:5:45539200	140	0.34	0	Translocation	14:29394400
26	HCN1	5	45540600	HCN1 (Breakpoint)	+:5:45540600|-:14:29397200	98	0.16	0	Translocation	14:29397200
26	HSD17B4	5	118955200	HSD17B4 (Breakpoint)	-:5:118960800|+:5:118955200	407	0.47	0	PossibleLargeIndel	5:118960800
26	HSD17B4	5	118956600	HSD17B4 (Breakpoint)	+:5:118956600|-:5:118963600	125	0.17	0	PossibleLargeIndel	5:118963600
26	IER3IP1	18	44683800	IER3IP1 (Breakpoint)	+:18:44683800|-:18:44699200	33	0.17	0	PossibleLargeIndel	18:44699200
26	KCNK13	14	90533800	KCNK13 (Breakpoint)	-:5:34391000|-:14:90533800	27	0.13	0	Translocation	5:34391000
26	KCNN2	5	36150800	KCNN2 (Breakpoint)	-:5:113765400|+:5:36150800	403	0.32	0	PossibleLargeIndel	5:113765400
26	KCNN2	5	113754200	KCNN2 (Breakpoint)	+:5:113754200|+:5:108280200	76	0.1	0	PossibleInversion	5:108280200
26	KCNN2	5	108340400	KCNN2 (Breakpoint)	-:5:113754200|-:5:108340400	68	0.12	0	PossibleInversion	5:113754200
26	KCNN2	5	131384400	KCNN2 (Breakpoint)	-:5:113712200|+:5:131384400	31	0.11	0	PossibleLargeIndel	5:113712200
26	KCNN2_FER	5	113754200	KCNN2_FER (Breakpoint)	+:5:113754200|+:5:108280200	76	0.1	0	PossibleInversion	5:108280200
26	KCNN2_FER	5	108340400	KCNN2_FER (Breakpoint)	-:5:113754200|-:5:108340400	68	0.12	0	PossibleInversion	5:113754200
26	KCNN2_LMBRD2	5	36150800	KCNN2_LMBRD2 (Breakpoint)	-:5:113765400|+:5:36150800	403	0.32	0	PossibleLargeIndel	5:113765400
26	KIAA0586	14	59008600	KIAA0586 (Breakpoint)	-:14:50569400|+:14:59008600	42	0.12	0	PossibleLargeIndel	14:50569400
26	LAMA3	18	21533400	LAMA3 (Breakpoint)	+:18:21533400|-:18:21477400	34	0.12	0	PossibleLargeIndel	18:21477400
26	LMBRD2	5	36150800	LMBRD2 (Breakpoint)	-:5:113765400|+:5:36150800	403	0.32	0	PossibleLargeIndel	5:113765400
26	LMBRD2_KCNN2	5	36150800	LMBRD2_KCNN2 (Breakpoint)	-:5:113765400|+:5:36150800	403	0.32	0	PossibleLargeIndel	5:113765400
26	LRFN5	5	36395800	LRFN5 (Breakpoint)	-:14:42211400|-:5:36395800	56	0.1	0	Translocation	14:42211400
26	LRP2	2	170104200	LRP2 (Breakpoint)	-:2:170109800|+:2:170104200	27	0.33	0	PossibleLargeIndel	2:170109800
26	LRRC9	5	8986600	LRRC9 (Breakpoint)	+:5:8986600|+:14:60390400	60	0.15	0	Translocation	14:60390400
26	MDGA2	5	35378000	MDGA2 (Breakpoint)	-:5:35378000|-:14:47759600	107	0.17	0	Translocation	14:47759600
26	MDGA2	5	114690800	MDGA2 (Breakpoint)	-:14:48105400|+:5:114690800	146	0.15	0	Translocation	14:48105400
26	MDGA2	14	47646200	MDGA2 (Breakpoint)	-:5:28324800|+:14:47646200	31	0.17	0	Translocation	5:28324800
26	MDGA2	14	47328400	MDGA2 (Breakpoint)	+:14:47328400|-:14:30128000	52	0.14	0	PossibleLargeIndel	14:30128000
26	MDGA2	14	47647600	MDGA2 (Breakpoint)	+:14:47647600|-:5:28324800	26	0.17	0	Translocation	5:28324800
26	MDGA2_PRKD1	14	47328400	MDGA2_PRKD1 (Breakpoint)	+:14:47328400|-:14:30128000	52	0.14	0	PossibleLargeIndel	14:30128000
26	NNT	5	43619800	NNT (Breakpoint)	+:5:43619800|+:5:117126800	101	0.11	0	PossibleInversion	5:117126800
26	NNT	5	117128200	NNT (Breakpoint)	+:5:117128200|+:5:43621200	92	0.14	0	PossibleInversion	5:43621200
26	NNT	5	114969400	NNT (Breakpoint)	+:5:114969400|+:5:43663200	61	0.13	0	PossibleInversion	5:43663200
26	NPAS3	14	33607000	NPAS3 (Breakpoint)	-:14:44807000|+:14:33607000	78	0.14	0	PossibleLargeIndel	14:44807000
26	NPAS3	14	33588800	NPAS3 (Breakpoint)	-:5:31992800|-:14:33588800	60	0.11	0	Translocation	5:31992800
26	NPAS3	14	33556600	NPAS3 (Breakpoint)	+:14:33556600|-:14:32110400	76	0.21	0	PossibleLargeIndel	14:32110400
26	NPAS3	14	44724400	NPAS3 (Breakpoint)	-:14:33546800|+:14:44724400	50	0.11	0	PossibleLargeIndel	14:33546800
26	NPAS3_NUBPL	14	33556600	NPAS3_NUBPL (Breakpoint)	+:14:33556600|-:14:32110400	76	0.21	0	PossibleLargeIndel	14:32110400
26	NPAS3_PDZD2	14	33588800	NPAS3_PDZD2 (Breakpoint)	-:5:31992800|-:14:33588800	60	0.11	0	Translocation	5:31992800
26	NRDE2	14	90308400	NRDE2 (Breakpoint)	-:14:90767600|+:14:90308400	87	0.34	0	PossibleLargeIndel	14:90767600
26	NRDE2	14	90778800	NRDE2 (Breakpoint)	-:5:973000|+:14:90778800	47	0.22	0	Translocation	5:973000
26	NRDE2	14	90780200	NRDE2 (Breakpoint)	+:14:90780200|-:5:975800	33	0.25	0	Translocation	5:975800
26	NRDE2	5	6673800	NRDE2 (Breakpoint)	+:5:6673800|+:14:90764800	30	0.16	0	Translocation	14:90764800
26	NRDE2_EFCAB11	14	90308400	NRDE2_EFCAB11 (Breakpoint)	-:14:90767600|+:14:90308400	87	0.34	0	PossibleLargeIndel	14:90767600
26	NREP	14	29412600	NREP (Breakpoint)	+:14:29412600|+:5:111140400	102	0.14	0	Translocation	5:111140400
26	NRXN3	5	11356800	NRXN3 (Breakpoint)	+:5:11356800|-:14:79353400	107	0.27	0	Translocation	14:79353400
26	NRXN3	14	80071600	NRXN3 (Breakpoint)	+:14:80071600|+:14:74212600	38	0.15	0	PossibleInversion	14:74212600
26	NRXN3	14	79209200	NRXN3 (Breakpoint)	-:14:74404400|+:14:79209200	32	0.15	0	PossibleLargeIndel	14:74404400
26	NRXN3_CTNND2	5	11356800	NRXN3_CTNND2 (Breakpoint)	+:5:11356800|-:14:79353400	107	0.27	0	Translocation	14:79353400
26	NRXN3_ELMSAN1	14	80071600	NRXN3_ELMSAN1 (Breakpoint)	+:14:80071600|+:14:74212600	38	0.15	0	PossibleInversion	14:74212600
26	NRXN3_FAM161B	14	79209200	NRXN3_FAM161B (Breakpoint)	-:14:74404400|+:14:79209200	32	0.15	0	PossibleLargeIndel	14:74404400
26	NUBPL	14	33556600	NUBPL (Breakpoint)	+:14:33556600|-:14:32110400	76	0.21	0	PossibleLargeIndel	14:32110400
26	NUBPL	14	32130000	NUBPL (Breakpoint)	+:14:32130000|+:14:41637400	28	0.11	0	PossibleInversion	14:41637400
26	NUBPL_NPAS3	14	33556600	NUBPL_NPAS3 (Breakpoint)	+:14:33556600|-:14:32110400	76	0.21	0	PossibleLargeIndel	14:32110400
26	PCDHA1	5	140221200	PCDHA1 (Breakpoint)	+:5:140221200|-:5:140238000	25	0.33	0	PossibleLargeIndel	5:140238000
26	PCDHA10	5	140221200	PCDHA10 (Breakpoint)	+:5:140221200|-:5:140238000	25	0.33	0	PossibleLargeIndel	5:140238000
26	PCDHA2	5	140221200	PCDHA2 (Breakpoint)	+:5:140221200|-:5:140238000	25	0.33	0	PossibleLargeIndel	5:140238000
26	PCDHA3	5	140221200	PCDHA3 (Breakpoint)	+:5:140221200|-:5:140238000	25	0.33	0	PossibleLargeIndel	5:140238000
26	PCDHA4	5	140221200	PCDHA4 (Breakpoint)	+:5:140221200|-:5:140238000	25	0.33	0	PossibleLargeIndel	5:140238000
26	PCDHA5	5	140221200	PCDHA5 (Breakpoint)	+:5:140221200|-:5:140238000	25	0.33	0	PossibleLargeIndel	5:140238000
26	PCDHA6	5	140221200	PCDHA6 (Breakpoint)	+:5:140221200|-:5:140238000	25	0.33	0	PossibleLargeIndel	5:140238000
26	PCDHA7	5	140221200	PCDHA7 (Breakpoint)	+:5:140221200|-:5:140238000	25	0.33	0	PossibleLargeIndel	5:140238000
26	PCDHA8	5	140221200	PCDHA8 (Breakpoint)	+:5:140221200|-:5:140238000	25	0.33	0	PossibleLargeIndel	5:140238000
26	PCDHA9	5	140221200	PCDHA9 (Breakpoint)	+:5:140221200|-:5:140238000	25	0.33	0	PossibleLargeIndel	5:140238000
26	PDZD2	5	31994200	PDZD2 (Breakpoint)	+:5:31994200|-:5:31551800	126	0.27	0	PossibleLargeIndel	5:31551800
26	PDZD2	14	33588800	PDZD2 (Breakpoint)	-:5:31992800|-:14:33588800	60	0.11	0	Translocation	5:31992800
26	PDZD2	5	6304200	PDZD2 (Breakpoint)	-:5:32005400|+:5:6304200	52	0.15	0	PossibleLargeIndel	5:32005400
26	PDZD2	5	31648400	PDZD2 (Breakpoint)	-:14:42821800|+:5:31648400	31	0.11	0	Translocation	14:42821800
26	PDZD2_C5orf22	5	31994200	PDZD2_C5orf22 (Breakpoint)	+:5:31994200|-:5:31551800	126	0.27	0	PossibleLargeIndel	5:31551800
26	PDZD2_NPAS3	14	33588800	PDZD2_NPAS3 (Breakpoint)	-:5:31992800|-:14:33588800	60	0.11	0	Translocation	5:31992800
26	PELI2	14	56751800	PELI2 (Breakpoint)	+:14:56751800|+:14:46153800	64	0.13	0	PossibleInversion	14:46153800
26	PELI2	14	53968600	PELI2 (Breakpoint)	-:14:53968600|-:14:56624400	61	0.14	0	PossibleInversion	14:56624400
26	PPARA	22	46562600	PPARA (Breakpoint)	+:22:46562600|-:22:46566800	28	0.22	0	PossibleLargeIndel	22:46566800
26	PPFIA2	12	82138000	PPFIA2 (Breakpoint)	+:12:82138000|-:12:82143600	32	0.16	0	PossibleLargeIndel	12:82143600
26	PPIP5K2	5	102517800	PPIP5K2 (Breakpoint)	-:5:120953000|+:5:102517800	130	0.17	0	PossibleLargeIndel	5:120953000
26	PRKD1	14	30126600	PRKD1 (Breakpoint)	+:14:30126600|+:14:51949800	31	0.11	0	PossibleInversion	14:51949800
26	PRKD1	14	47328400	PRKD1 (Breakpoint)	+:14:47328400|-:14:30128000	52	0.14	0	PossibleLargeIndel	14:30128000
26	PRKD1	14	51951200	PRKD1 (Breakpoint)	+:14:51951200|+:14:30128000	25	0.11	0	PossibleInversion	14:30128000
26	PRKD1_MDGA2	14	47328400	PRKD1_MDGA2 (Breakpoint)	+:14:47328400|-:14:30128000	52	0.14	0	PossibleLargeIndel	14:30128000
26	PRLR	5	35123200	PRLR (Breakpoint)	+:5:35123200|-:14:51948400	30	0.1	0	Translocation	14:51948400
26	RTN1	14	60305000	RTN1 (Breakpoint)	-:14:60305000|-:5:35288400	66	0.2	0	Translocation	5:35288400
26	SAMD4A	14	55104000	SAMD4A (Breakpoint)	-:5:25274200|+:14:55104000	42	0.12	0	Translocation	5:25274200
26	SEMA5A	5	9496200	SEMA5A (Breakpoint)	-:14:90365800|+:5:9496200	90	0.26	0	Translocation	14:90365800
26	SEMA5A	5	9497600	SEMA5A (Breakpoint)	+:5:9497600|-:14:90368600	55	0.29	0	Translocation	14:90368600
26	SEMA5A	14	82931800	SEMA5A (Breakpoint)	-:5:9097200|-:14:82931800	31	0.1	0	Translocation	5:9097200
26	SEMA5A_EFCAB11	5	9496200	SEMA5A_EFCAB11 (Breakpoint)	-:14:90365800|+:5:9496200	90	0.26	0	Translocation	14:90365800
26	SRFBP1	5	121395400	SRFBP1 (Breakpoint)	-:5:96640600|+:5:121395400	115	0.19	0	PossibleLargeIndel	5:96640600
26	SRFBP1	5	121396800	SRFBP1 (Breakpoint)	+:5:121396800|-:5:96643400	71	0.11	0	PossibleLargeIndel	5:96643400
26	TBCD	17	80712800	TBCD (Breakpoint)	+:17:80712800|-:17:80718400	29	0.19	0	PossibleLargeIndel	17:80718400
26	TDP1	14	90507200	TDP1 (Breakpoint)	+:14:90507200|-:14:51815400	29	0.1	0	PossibleLargeIndel	14:51815400
26	TNFSF13B	13	108945200	TNFSF13B (Breakpoint)	+:13:108945200|-:13:108950800	32	0.21	0	PossibleLargeIndel	13:108950800
26	TTC6	14	38479000	TTC6 (Breakpoint)	+:14:38479000|+:5:133760200	35	0.11	0	Translocation	5:133760200
26	VPS13B	8	100590000	VPS13B (Breakpoint)	+:8:100590000|-:8:100597000	28	0.14	0	PossibleLargeIndel	8:100597000
26	ZC3H12C	11	109985400	ZC3H12C (Breakpoint)	+:11:109985400|-:11:109991000	32	0.17	0	PossibleLargeIndel	11:109991000
27	ANO4	12	101390800	ANO4 (Breakpoint)	+:12:101390800|-:12:101395000	42	0.24	0	PossibleLargeIndel	12:101395000
27	CD36	7	80029600	CD36 (Breakpoint)	-:7:80211600|+:7:80029600	30	0.17	0	PossibleLargeIndel	7:80211600
27	CDH13	16	83669600	CDH13 (Breakpoint)	-:16:83676600|+:16:83669600	37	0.23	0	PossibleLargeIndel	16:83676600
27	CHPT1	12	102100600	CHPT1 (Breakpoint)	+:12:102100600|-:12:102106200	26	0.15	0	PossibleLargeIndel	12:102106200
27	COL24A1	1	86399600	COL24A1 (Breakpoint)	-:1:86403800|+:1:86399600	30	0.17	0	PossibleLargeIndel	1:86403800
27	ESR1	6	152388600	ESR1 (Breakpoint)	-:6:152391400|+:6:152388600	48	0.39	0	PossibleLargeIndel	6:152391400
27	FSTL1	3	120160600	FSTL1 (Breakpoint)	+:3:120160600|-:3:120164800	28	0.18	0	PossibleLargeIndel	3:120164800
27	FSTL4	5	132917400	FSTL4 (Breakpoint)	+:5:132917400|-:5:132924400	25	0.17	0	PossibleLargeIndel	5:132924400
27	NELL1	11	20843200	NELL1 (Breakpoint)	-:11:20848800|+:11:20843200	26	0.16	0	PossibleLargeIndel	11:20848800
27	PDE11A	2	178578400	PDE11A (Breakpoint)	-:2:178549000|+:2:178578400	28	0.11	0	PossibleLargeIndel	2:178549000
27	SLC24A2	9	19670000	SLC24A2 (Breakpoint)	+:9:19670000|-:9:19672800	25	0.13	0	PossibleLargeIndel	9:19672800
27	SLC4A10	2	162332800	SLC4A10 (Breakpoint)	+:2:162332800|-:2:162335600	30	0.24	0	PossibleLargeIndel	2:162335600
27	SPAG16	2	214873400	SPAG16 (Breakpoint)	+:2:214873400|-:2:214876200	32	0.21	0	PossibleLargeIndel	2:214876200
27	TNFSF13B	13	108945200	TNFSF13B (Breakpoint)	+:13:108945200|-:13:108950800	37	0.2	0	PossibleLargeIndel	13:108950800
28	ADAMTSL1	9	18803200	ADAMTSL1 (Breakpoint)	-:10:30721600|-:9:18803200	42	0.13	0	Translocation	10:30721600
28	APTX	6	18315200	APTX (Breakpoint)	+:6:18315200|-:9:33004800	33	0.16	0	Translocation	9:33004800
28	DEK	6	18257600	DEK (Breakpoint)	-:10:38737600|-:6:18257600	43	0.12	0	Translocation	10:38737600
28	DEK	10	38736000	DEK (Breakpoint)	-:6:18257600|-:10:38736000	20	0.1	0	Translocation	6:18257600
28	FREM1	9	14884800	FREM1 (Breakpoint)	-:6:18174400|+:9:14884800	94	0.38	0	Translocation	6:18174400
28	FREM1	6	31481600	FREM1 (Breakpoint)	-:9:14884800|-:6:31481600	28	0.16	0	Translocation	9:14884800
28	FREM1	9	14883200	FREM1 (Breakpoint)	-:6:31483200|-:9:14883200	27	0.12	0	Translocation	6:31483200
28	FREM1_KDM1B	9	14884800	FREM1_KDM1B (Breakpoint)	-:6:18174400|+:9:14884800	94	0.38	0	Translocation	6:18174400
28	HAUS6	9	19083200	HAUS6 (Breakpoint)	+:9:19083200|-:6:18179200	41	0.1	0	Translocation	6:18179200
28	HAUS6	9	19086400	HAUS6 (Breakpoint)	-:6:18180800|+:9:19086400	40	0.12	0	Translocation	6:18180800
28	HAUS6_KDM1B	9	19083200	HAUS6_KDM1B (Breakpoint)	+:9:19083200|-:6:18179200	41	0.1	0	Translocation	6:18179200
28	HCN1	5	27744000	HCN1 (Breakpoint)	+:5:27744000|-:5:45651200	28	0.17	0	PossibleLargeIndel	5:45651200
28	JARID2	6	15891200	JARID2 (Breakpoint)	+:6:15891200|+:6:15284800	39	0.12	0	PossibleInversion	6:15284800
28	KCNIP4	4	21756800	KCNIP4 (Breakpoint)	-:4:31969600|+:4:21756800	46	0.18	0	PossibleLargeIndel	4:31969600
28	KCNIP4	4	26006400	KCNIP4 (Breakpoint)	+:4:26006400|-:4:21755200	44	0.16	0	PossibleLargeIndel	4:21755200
28	KDM1B	9	14884800	KDM1B (Breakpoint)	-:6:18174400|+:9:14884800	94	0.38	0	Translocation	6:18174400
28	KDM1B	6	18190400	KDM1B (Breakpoint)	+:6:18190400|+:6:31496000	45	0.19	0	PossibleInversion	6:31496000
28	KDM1B	9	19083200	KDM1B (Breakpoint)	+:9:19083200|-:6:18179200	41	0.1	0	Translocation	6:18179200
28	KDM1B	9	19086400	KDM1B (Breakpoint)	-:6:18180800|+:9:19086400	40	0.12	0	Translocation	6:18180800
28	KDM1B_FREM1	9	14884800	KDM1B_FREM1 (Breakpoint)	-:6:18174400|+:9:14884800	94	0.38	0	Translocation	6:18174400
28	KDM1B_HAUS6	9	19083200	KDM1B_HAUS6 (Breakpoint)	+:9:19083200|-:6:18179200	41	0.1	0	Translocation	6:18179200
28	LDB2	4	16726400	LDB2 (Breakpoint)	-:5:2656000|+:4:16726400	31	0.13	0	Translocation	5:2656000
28	MAP3K8	10	30747200	MAP3K8 (Breakpoint)	+:10:30747200|-:9:28715200	62	0.23	0	Translocation	9:28715200
28	OFCC1	6	30184000	OFCC1 (Breakpoint)	-:6:30184000|-:6:9702400	35	0.16	0	PossibleInversion	6:9702400
28	RREB1_ZCCHC7	9	37355200	RREB1_ZCCHC7 (Breakpoint)	-:6:7208000|+:9:37355200	26	0.17	0	Translocation	6:7208000
28	SEMA5A	5	9280000	SEMA5A (Breakpoint)	-:4:14200000|+:5:9280000	73	0.23	0	Translocation	4:14200000
28	SEMA5A	5	7297600	SEMA5A (Breakpoint)	+:5:7297600|-:5:9267200	21	0.1	0	PossibleLargeIndel	5:9267200
28	ZCCHC7	9	37355200	ZCCHC7 (Breakpoint)	-:6:7208000|+:9:37355200	26	0.17	0	Translocation	6:7208000
28	ZCCHC7_RREB1	9	37355200	ZCCHC7_RREB1 (Breakpoint)	-:6:7208000|+:9:37355200	26	0.17	0	Translocation	6:7208000
28	ZNF622	5	16452800	ZNF622 (Breakpoint)	+:5:16452800|+:5:18752000	28	0.13	0	PossibleInversion	5:18752000
28	ZNF622	5	18753600	ZNF622 (Breakpoint)	+:5:18753600|+:5:16454400	21	0.11	0	PossibleInversion	5:16454400
29a	MARCH3	5	131743500	MARCH3 (Breakpoint)	-:5:126265500|+:5:131743500	31	0.12	0	PossibleLargeIndel	5:126265500
29a	MARCH3	5	131742000	MARCH3 (Breakpoint)	+:5:131742000|-:5:126264000	30	0.13	0	PossibleLargeIndel	5:126264000
29a	ACOT12	5	80646000	ACOT12 (Breakpoint)	+:5:80646000|+:5:79168500	59	0.12	0	PossibleInversion	5:79168500
29a	ACOT12	5	79170000	ACOT12 (Breakpoint)	+:5:79170000|+:5:80647500	31	0.11	0	PossibleInversion	5:80647500
29a	ADAMTS12	5	33850500	ADAMTS12 (Breakpoint)	-:7:2548500|+:5:33850500	53	0.12	0	Translocation	7:2548500
29a	ADAMTSL1	5	25420500	ADAMTSL1 (Breakpoint)	+:5:25420500|+:9:18892500	49	0.1	0	Translocation	9:18892500
29a	ADCY2	5	123892500	ADCY2 (Breakpoint)	-:5:7825500|+:5:123892500	108	0.29	0	PossibleLargeIndel	5:7825500
29a	ADCY2	5	116494500	ADCY2 (Breakpoint)	-:5:7480500|-:5:116494500	36	0.16	0	PossibleInversion	5:7480500
29a	ADCY2	5	7483500	ADCY2 (Breakpoint)	-:5:116496000|-:5:7483500	32	0.1	0	PossibleInversion	5:116496000
29a	ADCY2	5	7485000	ADCY2 (Breakpoint)	+:5:7485000|+:5:125362500	20	0.1	0	PossibleInversion	5:125362500
29a	ADCY2	5	6469500	ADCY2 (Breakpoint)	-:5:7690500|+:5:6469500	31	0.16	0	PossibleLargeIndel	5:7690500
29a	ADCY2	5	114241500	ADCY2 (Breakpoint)	-:5:7819500|+:5:114241500	20	0.1	0	PossibleLargeIndel	5:7819500
29a	ADCY2_UBE2QL1	5	6469500	ADCY2_UBE2QL1 (Breakpoint)	-:5:7690500|+:5:6469500	31	0.16	0	PossibleLargeIndel	5:7690500
29a	AFF4	5	132235500	AFF4 (Breakpoint)	+:5:132235500|-:5:96909000	82	0.16	0	PossibleLargeIndel	5:96909000
29a	AFF4	5	132238500	AFF4 (Breakpoint)	-:5:96910500|+:5:132238500	49	0.13	0	PossibleLargeIndel	5:96910500
29a	AGR2	7	16861500	AGR2 (Breakpoint)	-:7:12106500|-:7:16861500	73	0.12	0	PossibleInversion	7:12106500
29a	AGR2	7	12108000	AGR2 (Breakpoint)	-:7:16863000|-:7:12108000	66	0.12	0	PossibleInversion	7:16863000
29a	AGR2	7	16861500	AGR2 (Breakpoint)	+:7:16861500|-:7:20511000	88	0.14	0	PossibleLargeIndel	7:20511000
29a	ANKRD32	5	121570500	ANKRD32 (Breakpoint)	+:5:121570500|-:5:94023000	267	0.32	0	PossibleLargeIndel	5:94023000
29a	ATG10	5	120496500	ATG10 (Breakpoint)	-:5:81339000|-:5:120496500	32	0.13	0	PossibleInversion	5:81339000
29a	B4GALT1	5	41370000	B4GALT1 (Breakpoint)	-:9:33121500|+:5:41370000	106	0.23	0	Translocation	9:33121500
29a	B4GALT1	9	33132000	B4GALT1 (Breakpoint)	-:5:40035000|+:9:33132000	79	0.19	0	Translocation	5:40035000
29a	B4GALT1_PLCXD3	5	41370000	B4GALT1_PLCXD3 (Breakpoint)	-:9:33121500|+:5:41370000	106	0.23	0	Translocation	9:33121500
29a	BOLL	2	198627000	BOLL (Breakpoint)	+:2:198627000|-:2:198630000	28	0.18	0	PossibleLargeIndel	2:198630000
29a	C3orf67	2	160147500	C3orf67 (Breakpoint)	+:2:160147500|+:3:58771500	26	0.16	0	Translocation	3:58771500
29a	CAMK4	5	110766000	CAMK4 (Breakpoint)	+:5:110766000|+:5:109494000	69	0.12	0	PossibleInversion	5:109494000
29a	CAMK4	5	109495500	CAMK4 (Breakpoint)	+:5:109495500|+:5:110764500	68	0.1	0	PossibleInversion	5:110764500
29a	CARD11	5	4260000	CARD11 (Breakpoint)	+:5:4260000|+:7:2982000	39	0.11	0	Translocation	7:2982000
29a	CDC42SE2	9	8751000	CDC42SE2 (Breakpoint)	-:9:8751000|-:5:130585500	44	0.11	0	Translocation	5:130585500
29a	CDC42SE2	5	130713000	CDC42SE2 (Breakpoint)	+:5:130713000|-:5:111511500	111	0.15	0	PossibleLargeIndel	5:111511500
29a	CDC42SE2	5	130582500	CDC42SE2 (Breakpoint)	-:5:8595000|+:5:130582500	47	0.13	0	PossibleLargeIndel	5:8595000
29a	CDC42SE2_EPB41L4A	5	130713000	CDC42SE2_EPB41L4A (Breakpoint)	+:5:130713000|-:5:111511500	111	0.15	0	PossibleLargeIndel	5:111511500
29a	CDC42SE2_PTPRD	9	8751000	CDC42SE2_PTPRD (Breakpoint)	-:9:8751000|-:5:130585500	44	0.11	0	Translocation	5:130585500
29a	CDH18	5	15250500	CDH18 (Breakpoint)	-:5:19923000|+:5:15250500	50	0.14	0	PossibleLargeIndel	5:19923000
29a	CEP120	9	19602000	CEP120 (Breakpoint)	-:9:19602000|-:5:122740500	56	0.1	0	Translocation	5:122740500
29a	CEP120	5	122740500	CEP120 (Breakpoint)	-:5:89961000|+:5:122740500	43	0.11	0	PossibleLargeIndel	5:89961000
29a	CEP120_GPR98	5	122740500	CEP120_GPR98 (Breakpoint)	-:5:89961000|+:5:122740500	43	0.11	0	PossibleLargeIndel	5:89961000
29a	CEP120_SLC24A2	9	19602000	CEP120_SLC24A2 (Breakpoint)	-:9:19602000|-:5:122740500	56	0.1	0	Translocation	5:122740500
29a	CLPTM1L	5	1318500	CLPTM1L (Breakpoint)	-:5:6873000|+:5:1318500	69	0.26	0	PossibleLargeIndel	5:6873000
29a	CNTLN	5	40440000	CNTLN (Breakpoint)	+:5:40440000|-:9:17350500	133	0.21	0	Translocation	9:17350500
29a	CPNE4	3	131988000	CPNE4 (Breakpoint)	-:3:131994000|+:3:131988000	28	0.19	0	PossibleLargeIndel	3:131994000
29a	EPB41L4A	5	111726000	EPB41L4A (Breakpoint)	+:5:111726000|-:5:98971500	291	0.27	0	PossibleLargeIndel	5:98971500
29a	EPB41L4A	5	130713000	EPB41L4A (Breakpoint)	+:5:130713000|-:5:111511500	111	0.15	0	PossibleLargeIndel	5:111511500
29a	EPB41L4A_CDC42SE2	5	130713000	EPB41L4A_CDC42SE2 (Breakpoint)	+:5:130713000|-:5:111511500	111	0.15	0	PossibleLargeIndel	5:111511500
29a	FAM117A	17	47824500	FAM117A (Breakpoint)	+:17:47824500|-:17:47827500	28	0.13	0	PossibleLargeIndel	17:47827500
29a	FER	5	108193500	FER (Breakpoint)	+:5:108193500|-:5:88342500	154	0.23	0	PossibleLargeIndel	5:88342500
29a	FSTL4	5	132918000	FSTL4 (Breakpoint)	-:5:132924000|+:5:132918000	26	0.32	0	PossibleLargeIndel	5:132924000
29a	GFRA3	9	12481500	GFRA3 (Breakpoint)	-:5:137589000|+:9:12481500	44	0.1	0	Translocation	5:137589000
29a	GHR	5	42627000	GHR (Breakpoint)	-:5:42630000|+:5:42627000	39	0.26	0	PossibleLargeIndel	5:42630000
29a	GLIS3	9	4095000	GLIS3 (Breakpoint)	+:9:4095000|-:5:96352500	60	0.19	0	Translocation	5:96352500
29a	GLIS3	9	1074000	GLIS3 (Breakpoint)	+:9:1074000|-:9:4078500	33	0.2	0	PossibleLargeIndel	9:4078500
[truncated: 800 more rows]

## Sheet: SuppTableS7
Supplementary Table 6
Consensus somatic CNVs
LIWG=long insert whole genome
Count	Event	Chromosomal location	Peak Limits	Q-value	Selected genes
1	exome deletion peak 1	1p22.1	chr1:72748201-113217199	0.02902	ABCA4, ATP5F1, CD53, GNAI3, GNAT2, GNG5, MSH4, PRKACB, RABGGTB, RAP1A, CDC7, WNT2B, BCL10
2	exome deletion peak 2	1q31.2	chr1:1-249250621	0.049716	ABCA4, ABL2, PARP1, APOA2, BCL9, CD34, CDKN2C, GNAI3, GLUL, H3F3A, HDAC1, JAK1, JUN, IL10, IL6R, NRAS, SDHB, SDHC, TP53BP2, WNT2B, ARID1A, HIST3H3, HIST2H4A, BCL10, SETDB1
3	exome deletion peak 3	2p14	chr2:67211551-68358149	0.025106	C1D, ETAA1
4	exome deletion peak 4	2q31.1	chr2:177054901-177465899	0.036405	MTX2
5	LIWG deletion peak 1	2q37.3	chr2:232250201-243199373	0.044142	ALPP, KIF1A, GBX2, NDUFA10, PDCD1, PER2, STK25, SCLY, RAB17, ING5
	exome deletion peak 5	2q37.3	chr2:238280051-243199373	0.0023004	KIF1A, GPC1, NDUFA10, PDCD1, HDAC4, STK25, RAB17, ING5, TWIST2, UBE2F
6	exome deletion peak 6	3p25.1	chr3:15687051-15915299	0.031519	ANKRD28
7	exome deletion peak 7	3q13.2	chr3:112218301-112281949	0.019189	ATG3
8	exome deletion peak 9	4p15.33	chr4:13339901-13571749	0.0023327	NKX3-2, RAB28
9	exome deletion peak 8	4p16.3	chr4:248701-420049	0.043897	ZNF141, ZNF732
10	LIWG amplification peak 5	5p12	chr5:44599801-44691299	0.012943
11	exome amplification peak 2	5p13.2	chr5:35628351-35807499	0.0028144	SPEF2
	LIWG amplification peak 4	5p13.2	chr5:35620001-35827399	1.2733e-05	SPEF2
12	LIWG amplification peak 3	5p13.3	chr5:32099501-32269299	0.00065235	PDZD2, MTMR12, GOLPH3
13	LIWG amplification peak 2	5p15.1	chr5:16994901-17007599	0.01581
14	exome amplification peak 1	5p15.33	chr5:1254701-1322699	1.0405e-07	TERT, CLPTM1L, MIR4457
	LIWG amplification peak 1	5p15.33	chr5:1309001-1370899	0.0001546	CLPTM1L, MIR4457
15	LIWG deletion peak 2	5p15.33	chr5:1-33527399	0.02255	ADCY2, CTNND2, NUDFS6, CDH6, CDH9, CDH10, CDH12, CDH18, SDHA, PDZD2, TERT
16	exome deletion peak 10	6q13	chr6:57075101-147122899	0.02902	FYN, HDAC2, GRM1, PTPRK, MAP3K7, CDK19, RSPO3,
17	LIWG deletion peak 3	6q25.1	chr6:73908301-171115067	0.0109	ACAT2, PRDM1, ESR1, HDAC2, MLLT4, MYB, MAP3K4, MAP3K5, SOD2, MAP3K7, FBXO5, NDUFAF4, IL20RA, ARID1B
18	exome deletion peak 11	6q27	chr6:146875901-171115067	0.0030576	MLLT4, MAP3K4, PDCD2, ESR1, GPR31, IGF2R, ARID1B, FBXO5, SOD2
19	exome deletion peak 12	7q21.12	chr7:87229351-87505749	0.034402	SLC25A40, RUNDC3B
20	exome deletion peak 14	8p12	chr8:30669751-30853899	0.036073	TEX15
21	exome deletion peak 13	8p23.1	chr8:7217101-7305599	0.035273	DEFB4B, DEFB103A
22	exome deletion peak 17	9p11.2	chr9:43626551-45080299	0.0056734	CNTNAP3B, FAM27C
23	LIWG deletion peak 5	9p21.3	chr9:21821201-22447899	1.3458e-08	CDKN2A, CDKN2B, C9orf53
	exome deletion peak 16	9p21.3	chr9:21862201-22005699	3.7811e-14	CDKN2A, C9orf53
24	exome deletion peak 15	9p24.1	chr9:4860401-5231449	0.0022581
25	LIWG deletion peak 4	9p24.2	chr9:1-4986599	0.012671	SMARCA2, DMRT2, SLC1A1, DOCK8, GLIS3
26	exome deletion peak 19	10p11.1	chr10:35930351-38240799	0.02902
27	exome deletion peak 18	10p12.33	chr10:18087351-18241949	4.0103e-06	miRs
28	exome deletion peak 20	10q11.23	chr10:51225951-51549699	0.036405	ASAH2
29	exome deletion peak 21	10q11.23	chr10:51885201-52066599	0.018221	AGAP7
30	exome deletion peak 22	10q24.31	chr10:89505801-117823599	4.9319e-05
31	exome deletion peak 23	10q24.33	chr10:105048401-105151699	0.02902	TAF5, PCGF6
32	exome deletion peak 24	11q12.2	chr11:57996301-65729299	0.018221	ARL2, BAD, CD5, CD6, MS4A1, MS4A3, MAP3K11, RAB3IL1, STX3, STX5, VEGFB, RPS6KA4, HRASLS2, SDHAF2
33	LIWG deletion peak 6	11q13.1	chr11:58035301-65808299	0.04769	BAD, CD5, CD6, FEN1, GNG3, MS4A2, MAP4K2, FOSL1, VEGFB, EML3, NEAT1, SLC22A24
34	exome amplification peak 3	11q14.1	chr11:76637601-82444249	0.00061178	hsa-mir-4300, hsa-mir-708, CAPN5, CLNS1A, MYO7A, NDUFC2, OMP, PAK1, THRSP, GAB2, ODZ4, C11orf67, RSF1, ACER3, USP35, KCTD14, ALG8, NARS2, INTS4, B3GNT6, GDPD4, FAM181B, AQP11, KCTD21, MIR708, MIR4300, NDUFC2-KCTD14
	LIWG amplification peak 6	11q14.1	chr11:76598101-79157999	0.0020608	CAPN5, GAB2, PAK1, ACER3, USP35, INTS4, NARS2
35	exome deletion peak 25	11q21	chr11:94964001-95523649	0.014796	FAM76B
36	LIWG deletion peak 7	11q24.1	chr11:103909201-135006516	0.0109	ACAT1, APOA1, APOC3, ATM, CXCR5, CBL, CHEK1, H2AFX, IL18, SDHD, SORL1, RAB39A, BCL9L
37	exome deletion peak 26	11q24.2	chr11:101375601-135006516	0.0097715	BIRC2, BIRC3, ATM, CHEK1, CBL, MLL, IL18, IL10RA, HTR3A, H2AFX, SDHD, SORL1, APOA5
38	LIWG deletion peak 8	12q12	chr12:34181201-52348799	0.03919	ADCY6, ARF3, ATF1, CNTN1, GPD1, PRKAG1, WNT1, WNT10B, MLL2, HDAC7
39	exome amplification peak 4	12q14.1	chr12:58088201-59267849	0.028136	CDK4, CYP27B1, METTL1, TSPAN31, TSFM, CTDSP2, AVIL, OS9, METTL21B, XRCC6BP1, MARCH6, AGAP2, LRIG3
40	exome amplification peak 5	12q15	chr12:69202201-70091499	0.0033884	CPM, LYZ, MDM2, YEATS4, CCT2, FRS2, CPSF6, BEST3, LRRC10
	LIWG amplification peak 7	12q15	chr12:69213201-70120099	0.011739	LYZ, MDM2, FRS2, BEST3, LRRC10
41	exome deletion peak 27	12q21.31	chr12:78604301-88442799	0.015397	SLC6A15, PTPRQ, RASSF9, ACSS3
42	LIWG deletion peak 9	12q22	chr12:83527801-95365199	0.0109	ATP2B1, SOCS2, RASSF9, TSPAN19
43	exome deletion peak 28	12q23.2	chr12:102512201-102873849	0.01045	IGF1, PARPBP
44	exome deletion peak 29	14q21.2	chr14:20586501-93813299	0.039572	ARF6, BMP4, BCL2L2, FOS, MAP3K9, MYH6, MTHFD1, PAX9, PRKCH, PRKD1, NPKBIA, RAD51B, SOS2, MLH3, ATP5S, RAB2B, ADCY4, EML5, RAB15
45	exome deletion peak 30	14q32.33	chr14:102965801-107349540	0.014796	AKT1, EIF5, XRCC3, TRAF3, APOPT1, CRIP1, CRIP2
46	LIWG deletion peak 10	15q14	chr15:31662501-43575099	0.010999	ACTC1, BUB1B, RAD51, SNAP23, MAPKBP1, PAK6, SPRED1, UBR1, JMJD7
	exome deletion peak 31	15q14	chr15:1-62939649	0.02902	B2M, FGF7, BUB1B, MAPK6, RAB27A, MAPKBP1, PAK6, SPRED1, UBR1, JMJD7
47	LIWG deletion peak 11	16p13.3	chr16:5137801-7764099	0.0109	RBFOX1
48	LIWG deletion peak 12	17q11.2	chr17:29326501-29733999	0.036272	EVI2A, EVI2B, NF1, OMG

## Sheet: SuppTableS8
Supplementary Table 7
RNA fusions
Patient	Gene 1 chr: position	Gene 2 chr: position	Fusion	Corresponding SV called?
1	11:72141355	11:103780546	CLPB_PDGFD	Y
1	11:95724650	11:103029755	MAML2_DYNC2H1	N
1	17:37360251	17:37914217	RPL19_IKZF3	Y
1	20:4913100	20:5109475	SLC23A2_CDS2	Y
2	10:75006504	20:10594530	DNAJC9_C20orf94	N
3	17:1303340	17:1028701	YWHAE_ABR	N
3	2:46770326	2:50850752	RHOQ_NRXN1	N
3	22:22677324	22:23235963	LOC96610_IGLL5	N
3	3:78708835	3:47437632	ROBO1_PTPN23	N
3	5:60640354	9:16582980	ZSWIM6_BNC2	N
3	6:44218194	15:58984752	HSP90AB1_ADAM10	N
3	6:76596430	11:78270584	MYO6_NARS2	N
4	10:15210501	10:12214864	NMT2_NUDT5	N
4	12:116428824	12:43896207	MED13L_ADAMTS20	N
4	12:52370358	12:71158557	ACVR1B_PTPRR	N
4	12:69656341	5:10377909	CPSF6_MARCH6	N
4	12:69864309	12:71158557	FRS2_PTPRR	N
4	3:196533546	15:21937853	PAK2_LOC646214	N
6	1:91852787	11:65271764	HFM1_MALAT1	N
6	10:32873231	10:32832227	C10orf68_CCDC7	N
6	8:136637763	20:31424519	KHDRBS3_MAPRE1	N
7	7:104885196	19:5691385	SRPK2_RPL36	N
9	16:21968936	16:28975360	UQCRC2_NFATC2IP	N
9	3:47079155	3:46943255	SETD2_PTH1R	N
10	6:16239010	11:26660690	GMPR_ANO3	N
11	22:22677321	22:23235960	LOC96610_IGLL5	N
13	1:72740786	10:5808031	NEGR1_GDI2	N
13	15:63577477	15:27315121	APH1B_GABRG3	Y
14	12:109967876	12:118540974	UBE3B_VSIG10	Y
14	12:113612444	12:129456870	DDX54_GLT1D1	N
14	12:124882664	12:129056468	NCOR2_TMEM132C	Y
14	12:124955653	20:48604580	NCOR2_SNAI1	Y
14	12:62708696	12:67070613	USP15_GRIP1	Y
14	12:64197268	12:69992046	TMEM5_CCT2	N
14	12:64238662	12:58109542	SRGAP1_OS9	Y
14	12:64845966	12:66260733	TBK1_HMGA2	Y
14	12:64845966	12:69053059	TBK1_RAP1B	N
14	12:66549484	20:50372535	TMBIM4_ATP9A	Y
14	12:69203051	12:69991850	MDM2_CCT2	N
14	12:69290761	12:121454132	CPM_C12orf43	N
14	12:69925835	12:71171372	FRS2_PTPRR	N
14	12:70637259	12:64833023	CNOT2_XPOT	N
14	12:81794041	12:128781324	PPFIA2_TMEM132C	N
14	12:88389486	12:109221038	C12orf50_SSH1	N
14	20:50255881	5:17380618	ATP9A_LOC401177	N
14	5:17143879	5:17275316	LOC285696_BASP1	N
14	5:43313457	5:32010435	HMGCS1_PDZD2	N
15	7:147806212	22:18354602	CNTNAP2_MICAL3	N
16	22:22677324	22:23235963	LOC96610_IGLL5	N
17	1:12027147	1:37319322	PLOD1_GRIK3	N
17	1:38442555	1:70486687	SF3A3_LRRC7	Y
17	1:46124232	1:47748130	GPBP1L1_STIL	N
17	1:46425148	1:10067627	MAST2_RBP7	N
17	1:51910560	5:11236934	EPS15_CTNND2	N
17	1:7870626	1:52281994	PER3_NRD1	N
17	10:89705774	1:24021235	PTEN_RPL11	N
17	5:1322991	1:7750658	CLPTM1L_CAMTA1	N
17	5:14399178	1:51938619	TRIO_EPS15	N
19	11:35160916	11:36620400	CD44_C11orf74	N
19	3:56694758	5:151133233	FAM208A_ATOX1	N
19	8:59487164	11:40529655	SDCBP_LRRC4C	N
21	6:116360954	12:6979606	FRK_TPI1	N
22	12:69222710	12:65146536	MDM2_GNS	N
22	15:52820976	15:50955242	MYO5A_TRPM7	N
22	16:24741166	16:23359912	TNRC6A_SCNN1B	N
22	16:786265	7:5428966	NARFL_TNRC18	N
22	2:112698313	14:52458096	MERTK_C14orf166	N
22	22:22677321	22:23235960	LOC96610_IGLL5	N
22	4:15656826	7:21956511	FBXL5_CDCA7L	N
22	4:7668939	12:65078566	SORCS2_RASSF3	N
22	5:6633981	5:16783577	SRD5A1_MYO10	N
22	6:131505531	11:65116355	AKAP7_DPF2	N
22	7:26235466	7:16298636	HNRNPA2B1_ISPD	N
23	22:38149640	22:38355459	TRIOBP_POLR2F	N
24	17:41154945	7:130927701	RPL27_MKLN1	N
28	10:30748429	6:18258635	MAP3K8_DEK	N
28	17:28030079	17:28256955	SSH2_EFCAB5	N
28	4:13462322	4:16673105	RAB28_LDB2	N
28	6:20404062	6:20649523	E2F3_CDKAL1	N
28	X:119418981	X:119246823	FAM70A_RHOXF1	N
28	X:71379722	13:45912865	FLJ44635_TPT1	N
30	20:48330112	4:39739039	B4GALT5_UBE2K	N
30	9:13247633	9:20848621	MPDZ_FOCAD	N
31	13:31034701	13:26280168	HMGB1_ATP8A2	N
31	17:36918757	17:45438743	PSMB3_C17orf57	N
31	22:22677321	22:23235960	LOC96610_IGLL5	N
31	X:152954290	X:148055000	SLC6A8_AFF2	N
32	11:88033697	11:87883122	CTSC_RAB38	N
32	12:50899022	12:82796761	DIP2B_C12orf26	N
32	9:102768787	9:102713341	ERP44_STX17	N
25a	12:74565572	19:19387426	LOC100507377_SUGP1	N
29a	1:8926387	1:236647116	ENO1_EDARADD	N
29a	20:43533702	11:18512116	YWHAB_TSG101	N
29a	5:111512059	5:130714647	EPB41L4A_CDC42SE2	Y
29a	5:130970654	5:122365112	RAPGEF6_PPIC	N
29a	5:137589535	5:130925746	GFRA3_RAPGEF6	N
29a	5:6714811	5:7405098	PAPD7_ADCY2	N
29a	5:80494091	7:5110968	RASGRF2_RBAK-LOC389458	N
29a	5:80795363	9:5919414	SSBP2_KIAA2026	N
29a	7:11082440	7:18535884	PHF14_HDAC9	N
29a	7:18784862	5:106969359	HDAC9_EFNA5	N
29a	7:42959910	12:16056152	PSMA2_STRAP	N
29a	9:16727794	7:5110851	BNC2_RBAK-LOC389458	N
29a	9:6413642	9:26956012	UHRF2_IFT74	N
29c	16:2382590	19:39923905	ABCA3_RPS16	N
29c	5:80494091	7:5110968	RASGRF2_RBAK-LOC389458	N
